# Supplementary material for: Nickel-catalyzed reductive coupling of secondary alkyl bromides with alkynes to construct allylic difluoromethyl alkenes
Source: Royal Society of Chemistry journal article supplement (doi:10.1039/d5cc06347g), 2025-12-22

## Supporting Information

# Nickel-catalyzed Reductive Coupling of Secondary Alkyl Bromides with Alkynes to construct Allylic Difluoromethyl Alkenes

Jinxu Dong<sup>a‡</sup>, Xiaohong Wen<sup>a‡</sup>, Yihang Xu<sup>a</sup>, Jiaming Chen<sup>a</sup>, Yanli Yuan<sup>a</sup>, Xiaojun Zeng<sup>\*ab</sup>

<sup>a</sup> School of Chemistry and Chemical Engineering, Nanchang University, Nanchang, Jiangxi, 330031, China.

<sup>b</sup> Chongqing Research Institute of Nanchang University, Chongqing, 402660, China.

<sup>‡</sup> These authors contributed equally.

### Table of contents

|                                                                          |    |
|--------------------------------------------------------------------------|----|
| 1. General Information.....                                              | 2  |
| 2. General Procedure for the Preparation of Substrates.....              | 3  |
| 2.1 Commercial Materials .....                                           | 3  |
| 2.2 Prepared Materials .....                                             | 3  |
| 3. Optimization Studies.....                                             | 6  |
| 3.1 Screening of Reaction Conditions for the Cross-coupling Product..... | 6  |
| 4. Mechanism Studies .....                                               | 11 |
| 4.1 Radical Capture Experiment.....                                      | 11 |
| 4.2 Deuterium-Labeling Experiments .....                                 | 11 |
| 4.3 Proposed Mechanism.....                                              | 13 |
| 5. Synthetic Utility .....                                               | 13 |
| 5.1 Scale Reaction .....                                                 | 13 |
| 5.2 Synthesis of Diverse Difluoroalkylated Analogues.....                | 14 |
| 6. General Procedure for the Synthesis of the Product .....              | 17 |
| 7. Characterization of Products.....                                     | 18 |
| 8. References.....                                                       | 43 |
| 9. NMR Spectra .....                                                     | 44 |

## 1. General Information

Unless otherwise noted, all cross-coupling reactions were run under an N<sub>2</sub> atmosphere and all glassware was oven dried before use. Chemicals were purchased from Leyan, (cas 768-60-5, Ethynylanisole, Leyan, Shanghai) Adamas-beta®, Energy Chemical, bidepharm, and Macklin, were used without further purification. DMSO was purchased from Adamas-beta and dried with 4Å molecular sieves. GC/MS analysis was performed on a Thermo-Fischer Scientific ISQ QD single quadrupole mass spectrometer. Thin-layer chromatography (TLC) was performed on 0.20 mm silica gel F-254 plates, with resulting chromatograms visualized by fluorescence quenching or KMnO<sub>4</sub> stain. <sup>1</sup>H NMR, <sup>13</sup>C NMR, and <sup>19</sup>F NMR spectra were recorded at 297 K on a Bruker AVANCE AV 400 (400 MHz, 101MHz and 376 MHz) spectrometer. Data is reported in ppm using CDCl<sub>3</sub> as the solvent unless otherwise specified. Data is reported as: Chemical shifts (δ), multiplicity (s = singlet, d = doublet, t = triplet, q = quartet, m = multiplet, br = broad), coupling constants (Hz), integrated intensity.

## 2. General Procedure for the Preparation of Substrates

### 2.1 Commercial Materials

The following known starting materials (alkynes) were commercially available and used without further purification (Figure S1):

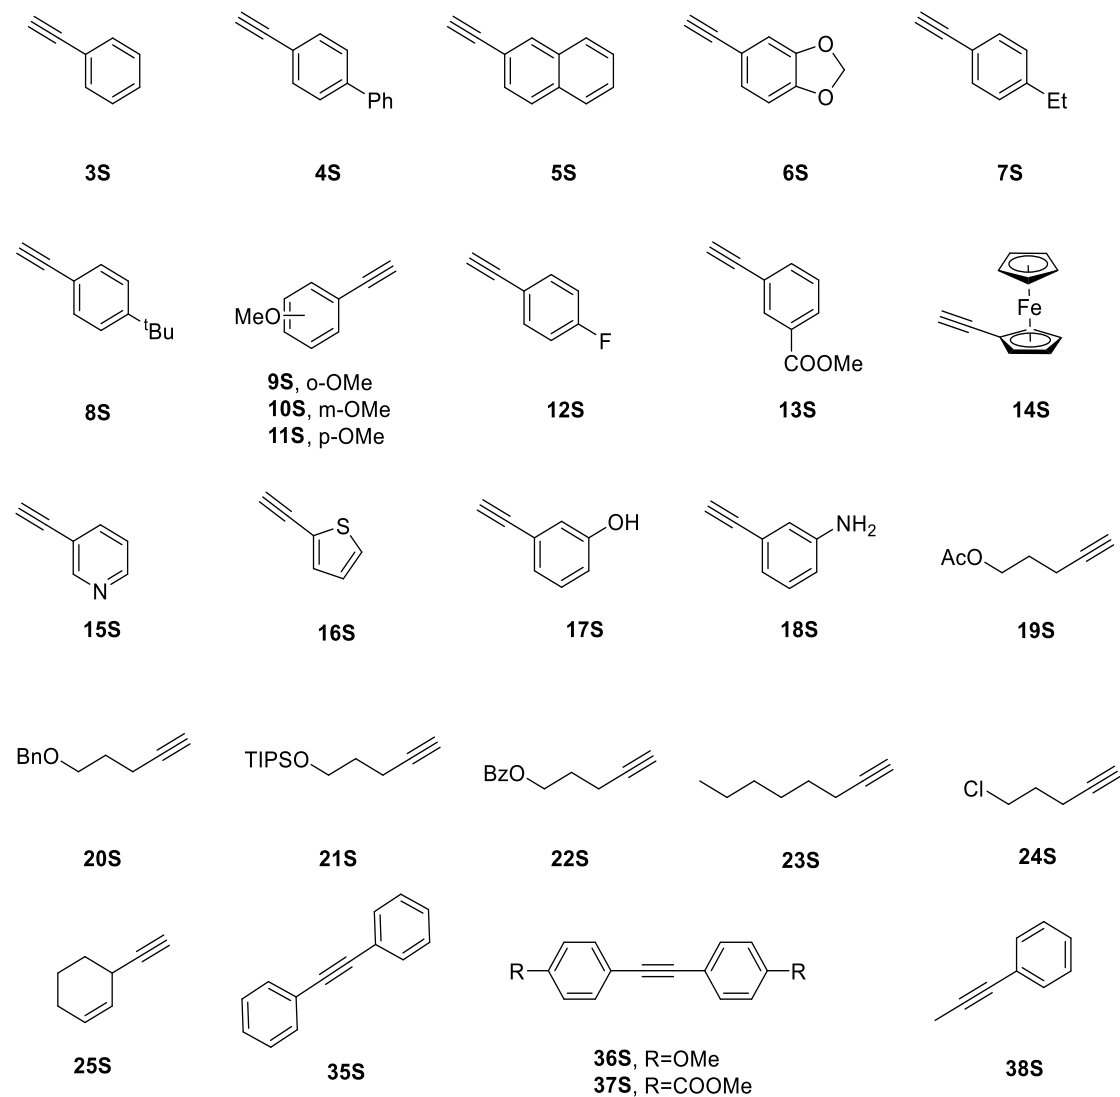

Figure S1. Structural formula of commercially available alkynes

### 2.2 Prepared Materials

The following known starting materials of Difluoromethyl bromide and Alkynes (Figure S2) were prepared according to the literature procedures: **26S-33S**, **39S**<sup>[1]</sup>, **40S**<sup>[2]</sup>, **41S**<sup>[3]</sup>, **42S**<sup>[4]</sup>.

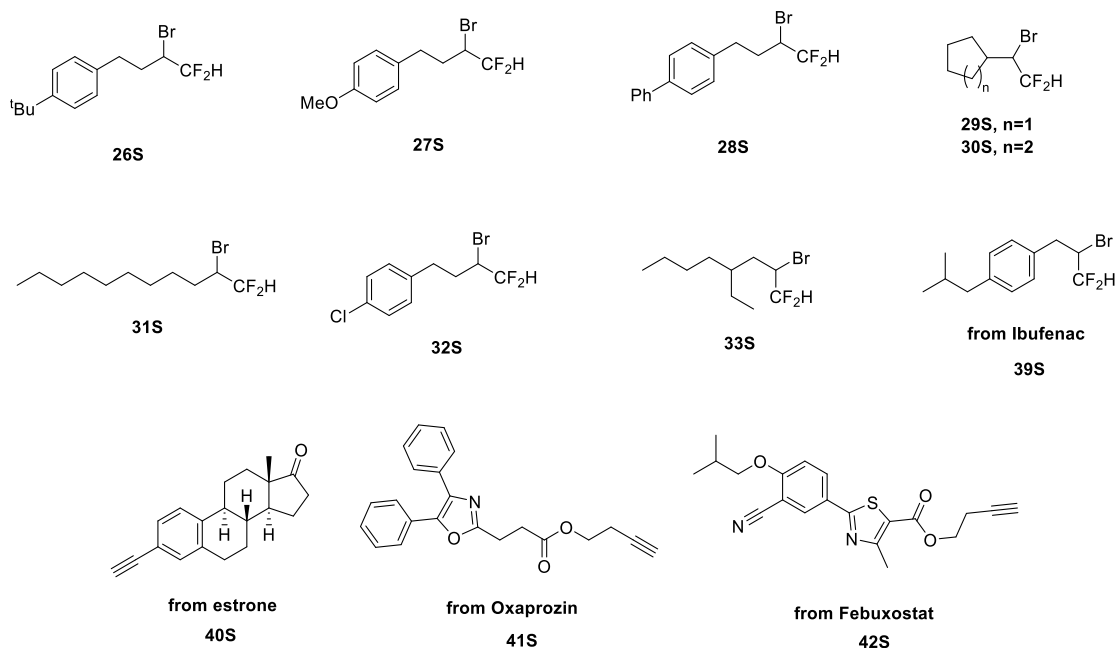

Figure S2. Structural formula of difluoromethyl bromide and alkynes

### General procedure of synthesis of substrate 34S.

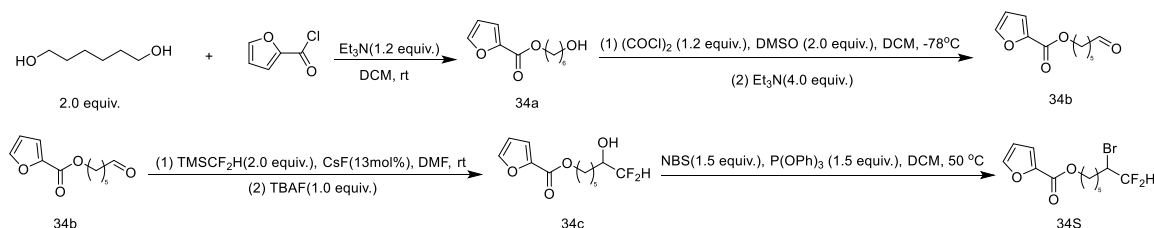

**Step 1:** In an oven-dried 100 mL round-bottom flask, 1.0 g (8.0 mmol) of 1,6-hexanediol and 16 mL of THF were added, and the mixture was cooled to 0 °C. Triethylamine (1.2 equiv.) was added to the system, followed by the dropwise addition of 520.0 mg (4.0 mmol) of 2-furoyl chloride. The resulting mixture was heated to 50 °C and stirred for 3 hours. The reaction mixture was then diluted with 15 mL of H<sub>2</sub>O and extracted with pentane (3 × 25 mL). The combined organic layers were dried over MgSO<sub>4</sub> and concentrated under reduced pressure. The crude product was purified by flash chromatography on silica gel to afford the desired product (**34a**).

**Step 2:** In an oven-dried 100 mL Schlenk flask, oxalyl chloride (453 mg, 1.2 equiv.) and dichloromethane (10 mL) were added in 1-(furan-2-yl)-6-hydroxyhexan-1-one (**34a**) (3.0 mmol, 1.0 equiv.), and the mixture was cooled to -78 °C. Dimethyl sulfoxide



(6 mmol, 2.0 equiv.) was then added dropwise, and the resulting mixture was stirred for 30 minutes. The alcohol was subsequently added dropwise to the reaction mixture and stirred for 1 h. Triethylamine (1.2 g, 4.0 equiv.) was then introduced, and the reaction was warmed to rt and stirred for 2 h. The reaction mixture was then diluted with 15 mL of H<sub>2</sub>O and extracted with pentane (3 × 25 mL). The combined organic layers were dried over MgSO<sub>4</sub> and concentrated under reduced pressure. The crude product was purified by flash chromatography on silica gel to afford the desired product (**34b**).

**Step 3:** Under N<sub>2</sub> atmosphere, CsF (47.2 mg, 0.13 equiv.) was added to a solution of 7-(furan-2-yl)-7-oxoheptanal (**34b**) (2.4 mmol, 1.0 equiv.) and Me<sub>3</sub>SiCF<sub>2</sub>H (1.2 g, 4.8 mmol, 2.0 equiv.) in 4 mL of DMF, then the mixture was stirred at room temperature overnight. A solution of TBAF (2.4 ml, 1 M in THF) was then added, and the whole mixture was stirred for another 1 h. After extraction with Et<sub>2</sub>O and H<sub>2</sub>O, the organic phase was washed with brine, and then dried over anhydrous Na<sub>2</sub>SO<sub>4</sub>. After the solution was filtered and the solvent was evaporated under vacuum, the residue was subjected to silica gel column chromatography to get 8,8-difluoro-1-(furan-2-yl)-7-hydroxyoctan-1-one (**34c**).

**Step 4:** Triphenylphosphite (2.34 g, 4.8 mmol, 1.5 equiv.) and 8,8-difluoro-1-(furan-2-yl)-7-hydroxyoctan-1-one (**34c**) was added over 5 min to a solution of NBS (N-bromosuccinimide) (1.34 g, 7.5 mmol, 1.5 equiv.) in CH<sub>2</sub>Cl<sub>2</sub> (15 mL) at 0 °C. Next, a solution of the alcohol (5 mmol, 1.0 equiv.) in CH<sub>2</sub>Cl<sub>2</sub> (10 mL) was added to the mixture at 0 °C. The reaction mixture was heated to 50 °C and then stirred for 6 h. Next, the solvent was evaporated, and the product (**34S**) was purified by flash chromatography on silica gel, yield: 23%, 373.6 mg.

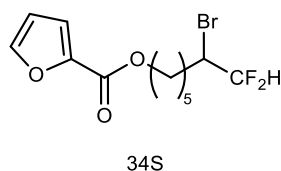

7-bromo-8,8-difluoro-1-(furan-2-yl)octan-1-one (**34S**); yellow oil.

R<sub>f</sub>=0.3 (petroleum ether: ethyl acetate, 20:1, v/v)

**<sup>1</sup>H NMR (400 MHz, CDCl<sub>3</sub>)** δ 7.57 (s, 1H), 7.17 (d, *J* = 3.5 Hz, 1H), 6.50 (dd, *J* = 3.6, 1.7 Hz, 1H), 5.83 (td, *J* = 55.9, 3.8 Hz, 1H), 4.31 (t, *J* = 6.6 Hz, 2H), 4.07 – 3.74 (m, 1H), 2.07 – 1.94 (m, 1H), 1.86 – 1.75 (m, 3H), 1.72 – 1.66 (m, 1H), 1.59 – 1.40 (m, 3H).

**<sup>13</sup>C NMR (101 MHz, CDCl<sub>3</sub>)** δ 158.9, 146.4, 144.9, 118.0, 114.9 (t, *J* = 279.3 Hz), 111.9, 64.8, 50.6 (t, *J* = 24.0 Hz), 30.8 (t, *J* = 2.8 Hz), 28.5, 26.6, 25.4.

**<sup>19</sup>F NMR (376 MHz, CDCl<sub>3</sub>)** δ -115.92 – -127.23 (m).

**HRMS (ESI)** *m/z* calcd for C<sub>12</sub>H<sub>16</sub>BrF<sub>2</sub>O<sub>3</sub>[(M+H)<sup>+</sup>]: 325.0245, found:325.0240.

### 3. Optimization Studies

#### 3.1 Screening of Reaction Conditions for the Cross-coupling Product

**General procedure:** In a nitrogen-filled glovebox, to an 8 mL vial equipped with a stir bar was added catalyst (0.01 mmol, 10 mol%), [N] ligand (0.01 mmol, 10 mol%), [P] ligand (0.01 mmol, 10 mol%), base (2.0 equiv.), then [Si-H] (2.0 equiv.) and solvent was added and stirred at rt for 10 min, after that difluoroalkyl bromides **1** (0.1 mmol, 1.0 equiv.) and alkynes (**2a**, 0.15 mmol, 1.5 equiv.) was added to the mixture and stirred for 12 h. After the reaction was completed, the mixture was diluted with EtOAc, the crude product was purified by flash chromatography.

**Table S1** The effects of solvent on the reaction <sup>a-b</sup>.

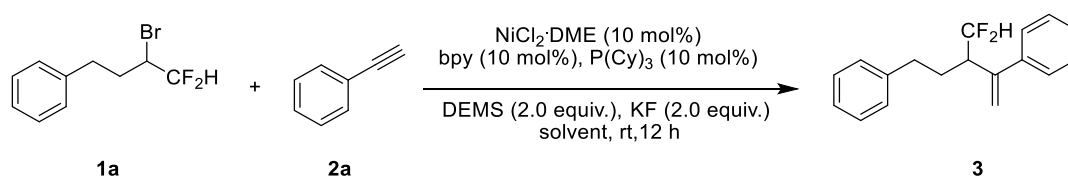

| entry | solvent     | Yield(%) <sup>b</sup> |
|-------|-------------|-----------------------|
| 1     | THF         | trace                 |
| 2     | DMF         | 83                    |
| 3     | 1,4-dioxane | 13                    |
| 4     | MeCN        | nd                    |
| 5     | NMP         | 22                    |

|   |      |       |
|---|------|-------|
| 6 | DMA  | 86    |
| 7 | DMSO | trace |

<sup>a</sup> Reaction conditions: secondary alkyl bromides **1a** (0.1 mmol), alkynes **2a** (0.15 mmol), Catalyst (10 mol%), Ligand (10 mol%), [Si-H] (2.0 equiv.), base (2.0 equiv.), solvent (0.5 mL), rt, 12 h. <sup>b</sup> Yields determined by <sup>19</sup>F NMR using PhCF<sub>3</sub> as internal standard.

**Table S2** The effects of catalysts on the reaction <sup>a-b</sup>.

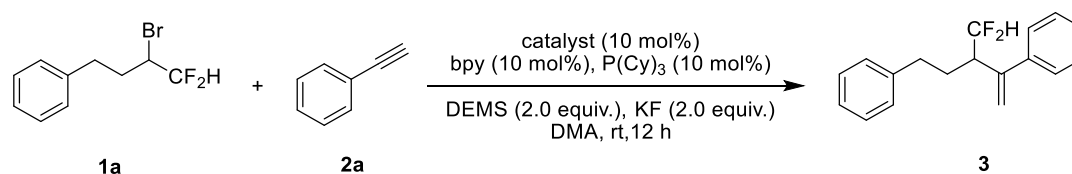

| entry | catalyst                             | Yield(%) <sup>b</sup> |
|-------|--------------------------------------|-----------------------|
| 1     | NiCl <sub>2</sub>                    | 37                    |
| 2     | NiBr <sub>2</sub> ·DME               | 57                    |
| 3     | NiCl <sub>2</sub> ·6H <sub>2</sub> O | 32                    |
| 4     | NiBr <sub>2</sub>                    | 40                    |
| 5     | NiCl <sub>2</sub> ·DME               | 86                    |
| 6     | Ni(acac) <sub>2</sub>                | nd                    |
| 7     | Ni(OAc) <sub>2</sub>                 | 11                    |
| 8     | Ni(OTf) <sub>2</sub>                 | nd                    |

<sup>a</sup> Reaction conditions: secondary alkyl bromides **1a** (0.1 mmol), alkynes **2a** (0.15 mmol), Catalyst (10 mol%), Ligand (10 mol%), [Si-H] (2.0 equiv.), base (2.0 equiv.), solvent (0.5 mL), rt, 12 h. <sup>b</sup> Yields determined by <sup>19</sup>F NMR using PhCF<sub>3</sub> as internal standard.

**Table S3** The effects of [N] ligand on the reaction <sup>a-b</sup>.

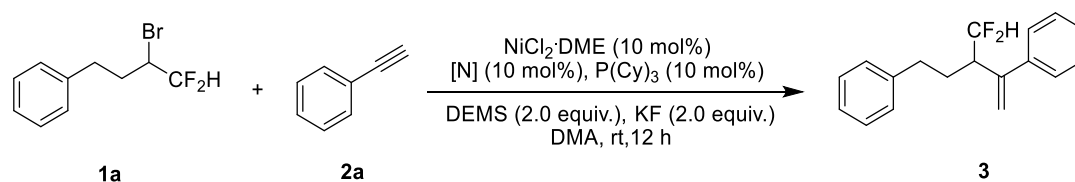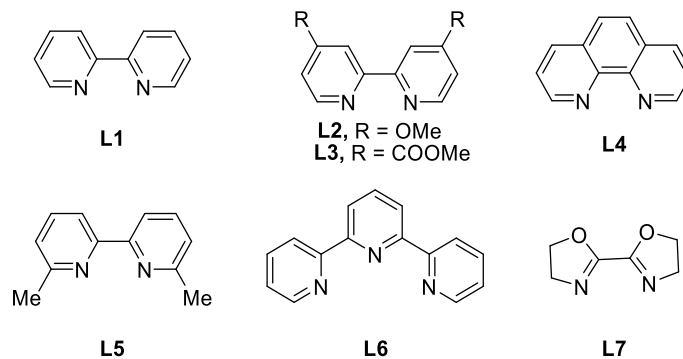

| entry | [N] ligand/ P(Cy) <sub>3</sub> | Yield(%) <sup>b</sup> |
|-------|--------------------------------|-----------------------|
| 1     | L1                             | 86                    |
| 2     | L2                             | 74                    |
| 3     | L3                             | 61                    |
| 4     | L4                             | Trace                 |
| 5     | L5                             | Trace                 |
| 6     | L6                             | nd                    |
| 7     | L7                             | nd                    |

<sup>a</sup> Reaction conditions: secondary alkyl bromides **1a** (0.1 mmol), alkynes **2a** (0.15 mmol), Catalyst (10 mol%), Ligand (10 mol%), [Si-H] (2.0 equiv.), base (2.0 equiv.), solvent (0.5 mL), rt, 12 h. <sup>b</sup> Yields determined by <sup>19</sup>F NMR using PhCF<sub>3</sub> as internal standard.

**Table S4** The effects of [P] ligand on the reaction<sup>a-b</sup>.

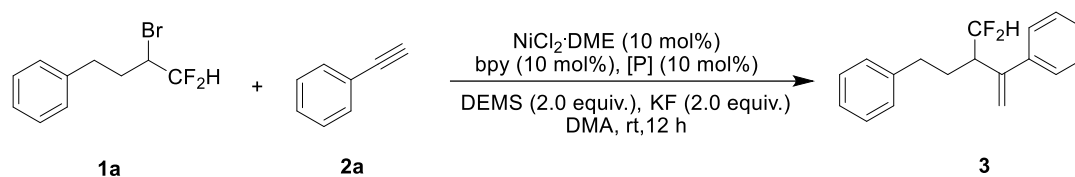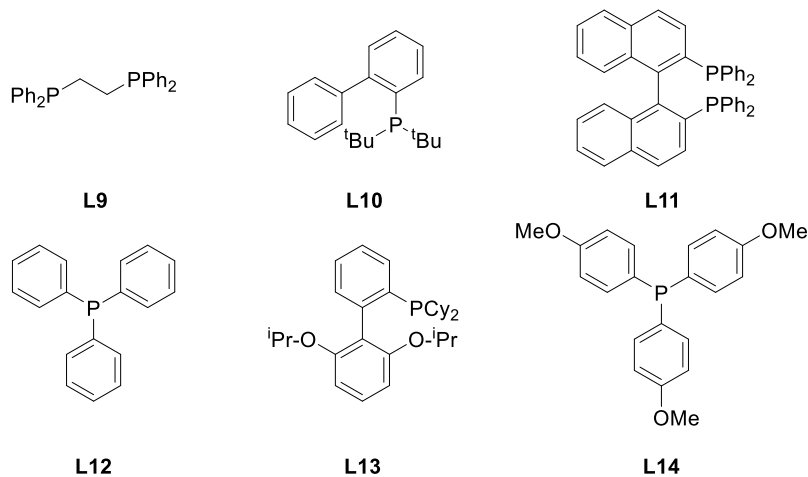

| entry | bpy/ [P] ligand | Yield(%) <sup>b</sup> |
|-------|-----------------|-----------------------|
| 1     | L9              | 21                    |
| 2     | L10             | 27                    |
| 3     | L11             | 51                    |
| 4     | L12             | 74                    |
| 5     | L13             | 53                    |
| 6     | L14             | 67                    |

<sup>a</sup> Reaction conditions: secondary alkyl bromides **1a** (0.1 mmol), alkynes **2a** (0.15 mmol), Catalyst (10 mol%), Ligand (10 mol%), [Si-H] (2.0 equiv.), base (2.0 equiv.), solvent (0.5 mL), rt, 12 h. <sup>b</sup> Yields determined by <sup>19</sup>F NMR using PhCF<sub>3</sub> as internal standard.

**Table S5** The effects of base on the reaction<sup>a-b</sup>.

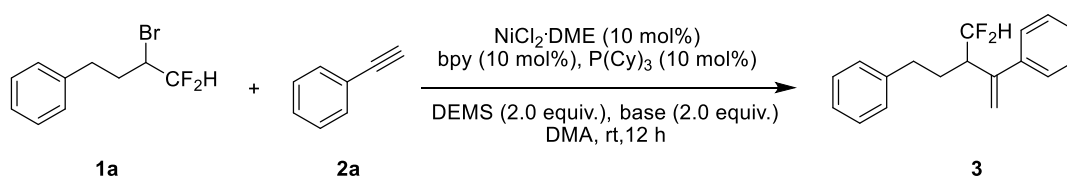

| entry | Base                                              | Yield(%) <sup>b</sup> |
|-------|---------------------------------------------------|-----------------------|
| 1     | Cs <sub>2</sub> CO <sub>3</sub>                   | 14                    |
| 2     | Na <sub>2</sub> CO <sub>3</sub>                   | nd                    |
| 3     | K <sub>2</sub> CO <sub>3</sub>                    | 22                    |
| 4     | KF                                                | 86                    |
| 5     | CsF                                               | 48                    |
| 6     | K <sub>3</sub> PO <sub>4</sub>                    | 26                    |
| 7     | K <sub>3</sub> PO <sub>4</sub> ·3H <sub>2</sub> O | nd                    |
| 8     | DABCO                                             | nd                    |

<sup>a</sup> Reaction conditions: secondary alkyl bromides **1a** (0.1 mmol), alkynes **2a** (0.15 mmol), Catalyst (10 mol%), Ligand (10 mol%), [Si-H] (2.0 equiv.), base (2.0 equiv.), solvent (0.5 mL), rt, 12 h. <sup>b</sup> Yields determined by <sup>19</sup>F NMR using PhCF<sub>3</sub> as internal standard.

**Table S6** The effects of Si-[H] on the reaction<sup>a-b</sup>.

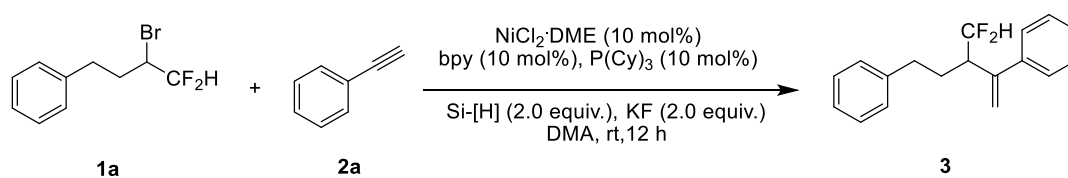

| entry <sup>a</sup> | Si-[H]                 | Yield(%) <sup>b</sup> |
|--------------------|------------------------|-----------------------|
| 1                  | Et <sub>3</sub> SiH    | 13                    |
| 2                  | Ph <sub>3</sub> SiH    | trace                 |
| 3                  | DEMS                   | 86                    |
| 4                  | (MeO) <sub>3</sub> SiH | 59                    |

<sup>a</sup> Reaction conditions: secondary alkyl bromides **1a** (0.1 mmol), alkynes **2a** (0.15 mmol), Catalyst (10 mol%), Ligand (10 mol%), [Si-H] (2.0 equiv.), base (2.0 equiv.),



1.5 equiv.), difluoromethyl alkyl bromide **2a** (48.0 mg, 0.2 mmol, 1.0 equiv.), DEMS (53.6 mg, 0.4 mmol, 2.0 equiv.), and N, N-dimethylacetamide (0.3 mL) were added via syringe. The reaction was stirred at room temperature for 12 hours.

Upon completion, the reaction mixture was diluted with ethyl acetate (20 mL) and filtered through a pad of celite. The filtrate was washed with brine (20 mL) and extracted with ethyl acetate (3 × 15 mL). The combined organic layers were dried over Na<sub>2</sub>SO<sub>4</sub>, filtered, and concentrated under reduced pressure. The crude product was analyzed by <sup>1</sup>H NMR spectroscopy. Deuterium incorporation was confirmed by the disappearance or change of the corresponding vinylic proton signal. Quantitative analysis based on the integration of this signal indicated a deuterium incorporation ratio of approximately 1:1.

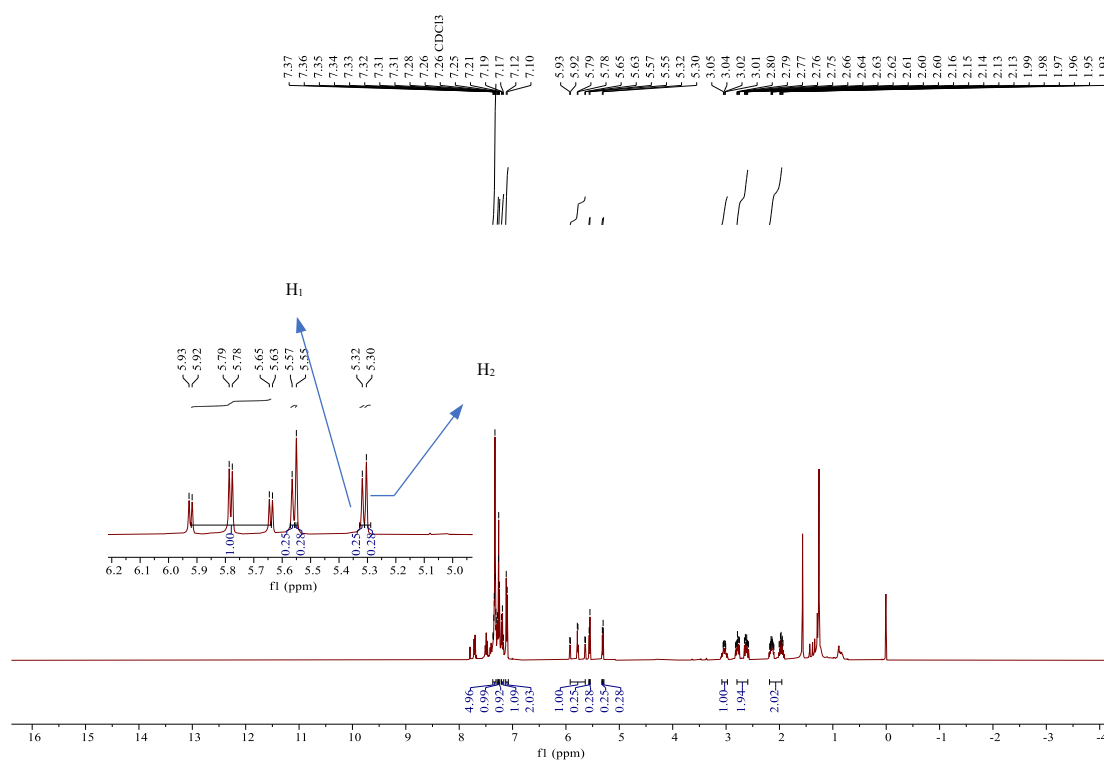



### 4.3 Proposed Mechanism<sup>[5]</sup>

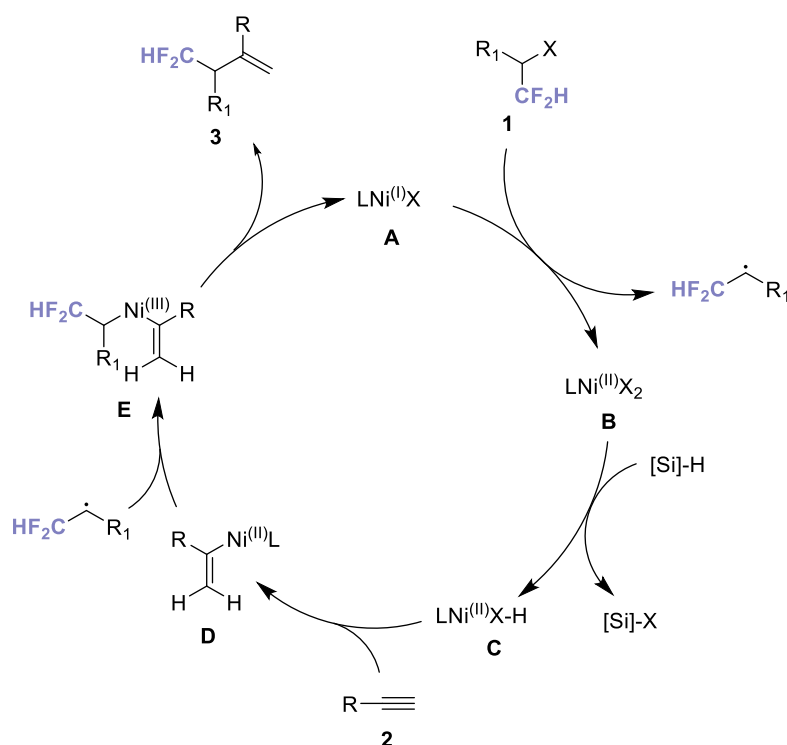

## 5. Synthetic Utility

### 5.1 Scale Reaction

Preparation of difluoroalkylated alkane

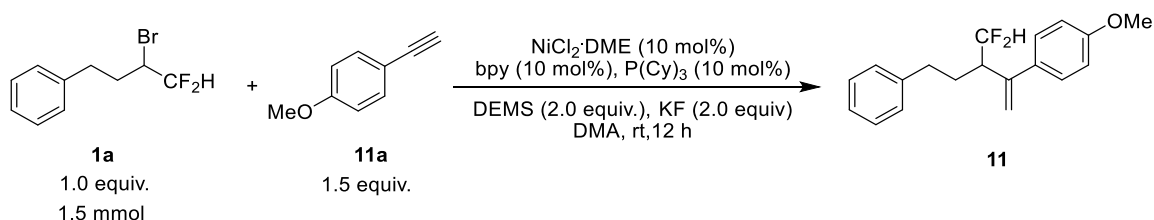

$\text{NiCl}_2 \cdot \text{DME}$  (33.1 mg, 0.15 mmol, 10 mol%),  $\text{bpy}$  (23.4 mg, 0.15 mmol, 10 mol%),  $\text{P}(\text{Cy})_3$  (42.0 mg, 0.15 mmol, 10 mol%) and  $\text{KF}$  (174.0 mg, 3.0 mmol, 2.0 equiv.) were firstly combined in a 20 mL oven-dried sealing tube. The vessel was evacuated and back filled with  $\text{N}_2$  (repeated for 3 times). 1-Ethynyl-4-methoxybenzene **11a** (297.4 mg, 2.25 mmol, 1.5 equiv.), difluoroalkyl bromide **1a** (372.6 mg, 1.5 mmol, 1.0 equiv.),  $\text{DEMS}$  (301.2 mg, 3.0 mmol, 2.0 equiv.) and  $\text{N,N}$ -Dimethylacetamide (6 mL) were added via syringe. The tube was sealed with a Teflon lined cap and stirred at 23 °C for 12 h. The reaction mixture was then diluted with ethyl acetate (20 mL) and filtered

through a pad of celite. The filtrate was added brine (20 mL) and extracted with ethyl acetate ( $3 \times 15$  mL), the combined organic layer was dried over  $\text{Na}_2\text{SO}_4$ , filtrated and concentrated under vacuum. The residue was then purified by flash column chromatography to give coupling product **11** in 71% yield (286 mg).

## 5.2 Synthesis of Diverse Difluoroalkylated Analogues

### Preparation of difluoromethylated alkane

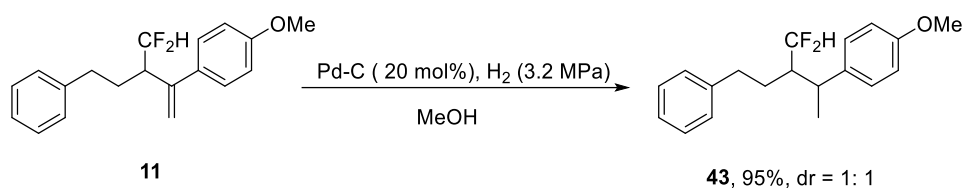

In a 25 mL high-pressure reaction vessel, compound **11** (60.2 mg, 0.2 mmol, 1.0 equiv.) and Pd/C (11 mg, 20 mol%) were added. The reaction system was evacuated and purged with hydrogen gas to an internal pressure of 3.2 MPa. The mixture was stirred at room temperature for 16 hours. Upon completion, the reaction mixture was diluted with ethyl acetate (20 mL) and filtered through a pad of celite. The filtrate was washed with brine (20 mL) and extracted with ethyl acetate ( $3 \times 15$  mL). The combined organic layers were dried over  $\text{Na}_2\text{SO}_4$ , filtered, and concentrated under reduced pressure. The residue was purified by flash column chromatography to afford the desired product.

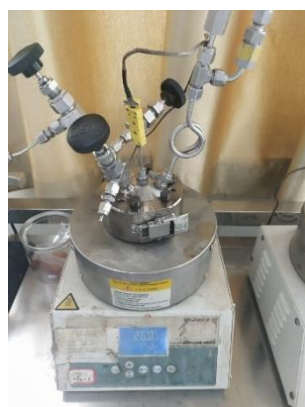

Figure 4: Device diagram of product 43

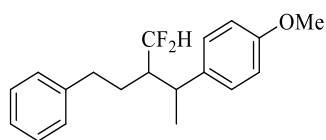

43

1-(3-(difluoromethyl)-5-phenylpentan-2-yl)-4-methoxybenzene (**43**) (57.6 mg, 95%, dr = 1:1); colorless liquid.

$R_f$  = 0.7 (petroleum ether)

$^1\text{H}$  NMR (400 MHz,  $\text{CDCl}_3$ )  $\delta$  7.29 (d,  $J$  = 7.1 Hz, 2H), 7.26 – 7.16 (m, 4H), 7.17 – 7.04 (m, 8H), 6.89 – 6.81 (m, 4H), 5.82 (td,  $J$  = 51.7, 4.0 Hz, 1H), 5.55 (td,  $J$  = 52.0, 4.0 Hz, 1H), 3.81 (d,  $J$  = 1.1 Hz, 6H), 3.06 – 2.86 (m, 2H), 2.82 – 2.46 (m, 4H), 2.06 – 1.85 (m, 3H), 1.81 – 1.66 (m, 3H), 1.31 (s, 3H), 1.29 (s, 3H).

$^{13}\text{C}$  NMR (101 MHz,  $\text{CDCl}_3$ )  $\delta$  158.3, 158.3, 142.2, 141.9, 136.3, 136.3, 128.7, 128.6, 128.5, 128.5, 126.0, 126.0, 118.9 (t,  $J$  = 243.4 Hz), 118.7 (t,  $J$  = 243.4 Hz), 114.1, 114.0, 55.4, 47.9 (t,  $J$  = 17.8 Hz), 47.3 (t,  $J$  = 17.8 Hz), 38.2 (d,  $J$  = 2.5 Hz), 38.2 (d,  $J$  = 3.0 Hz), 38.0 (d,  $J$  = 3.1 Hz), 38.0 (d,  $J$  = 3.4 Hz), 34.3, 34.0, 27.4 (t,  $J$  = 3.5 Hz), 26.7 (t,  $J$  = 3.6 Hz), 18.5, 18.2.

$^{19}\text{F}$  NMR (376 MHz,  $\text{CDCl}_3$ )  $\delta$  -115.16 – -120.34 (m), -120.13 – -130.49 (m).

HRMS (EI)  $m/z$  calcd for  $\text{C}_{19}\text{H}_{22}\text{F}_2\text{O}[\text{M}^+]$ : 304.1639, found: 304.1636.

### Preparation of $\alpha$ -Difluoromethyl Ketone

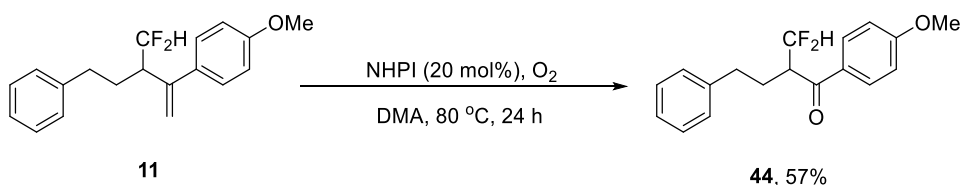

In an oven-dried 25 mL sealed tube, N-hydroxyphthalimide (20 mol%) and compound **11** (60.2 mg, 0.2 mmol, 1.0 equiv.) were added. The system was then evacuated and charged with an  $\text{O}_2$  filled balloon. The reaction mixture was heated to 80 °C and stirred for 24 hours. After cooling, the crude mixture was directly adsorbed onto silica gel and purified by flash chromatography on silica gel using ethyl acetate (20 mL) as the eluent to afford the desired product **44**.

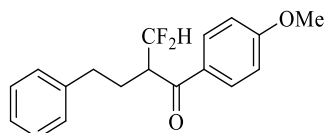

44

2-(difluoromethyl)-1-(4-methoxyphenyl)-4-phenylbutan-1-one (**44**) (34.6 mg, 57%); yellow liquid.

$R_f$  = 0.7 (petroleum ether)

$^1\text{H}$  NMR (400 MHz,  $\text{CDCl}_3$ )  $\delta$  7.81 (dd,  $J$  = 8.8, 1.3 Hz, 2H), 7.28 (d,  $J$  = 8.3 Hz, 1H), 7.25 (s, 1H), 7.21 (d,  $J$  = 7.7 Hz, 1H), 7.10 (d,  $J$  = 8.0 Hz, 2H), 6.92 (d,  $J$  = 8.8 Hz, 2H), 6.04 (td,  $J$  = 56.2, 6.7 Hz, 1H), 3.88 (s, 3H), 3.91 – 3.80 (m, 1H), 2.73 – 2.53 (m, 2H), 2.28 – 2.14 (m, 1H), 2.13 – 2.03 (m, 1H).

$^{13}\text{C}$  NMR (101 MHz,  $\text{CDCl}_3$ )  $\delta$  196.6, 164.2, 140.5, 131.0, 129.7, 128.6, 128.5, 126.3, 117.7 (t,  $J$  = 243.4 Hz), 114.0, 55.6, 48.9 (t,  $J$  = 20.3 Hz), 32.8, 29.3 (dd,  $J$  = 6.0, 2.0 Hz).

$^{19}\text{F}$  NMR (376 MHz,  $\text{CDCl}_3$ )  $\delta$  -110.33 – -131.06 (m).

HRMS (EI)  $m/z$  calcd for  $\text{C}_{18}\text{H}_{18}\text{F}_2\text{O}_2[\text{M}^+]$ : 304.1275, found: 304.1271.

#### Preparation of (E)-1-(1-bromo-3-(difluoromethyl)-5-phenylpent-1-en-2-yl)-4-methoxybenzene

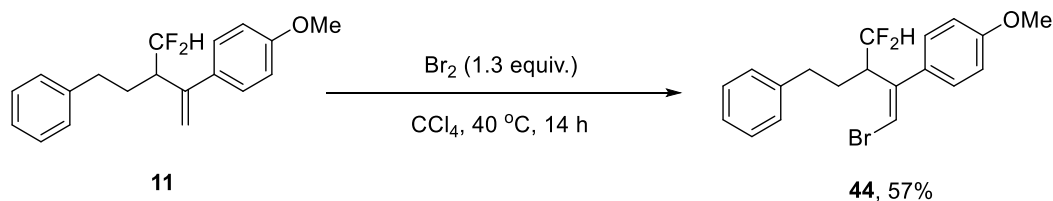

In a 25 mL Schlenk flask, compound **11** (60.2 mg, 0.2 mmol, 1.0 equiv.) was dissolved in carbon tetrachloride. Liquid bromine (0.2 mmol, 2.0 equiv.) was then added to the mixture. The reaction mixture was stirred at 40 °C for 18 hours. Upon completion, the reaction was quenched with a saturated aqueous solution of sodium thiosulfate and extracted with ethyl acetate (3  $\times$  20 mL). The combined organic layers were washed with brine, dried over  $\text{Na}_2\text{SO}_4$ , and concentrated under reduced pressure. The residue was purified by column chromatography on silica gel to afford the desired product **45**.

2D NMR analysis of the product confirmed the presence of a single configurational isomer.

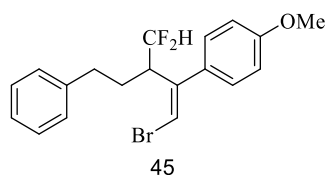

(E)-1-(1-bromo-3-(difluoromethyl)-5-phenylpent-1-en-2-yl)-4-methoxybenzene (**45**) (49.3 mg, 65%); yellow oil.

**R<sub>f</sub>** = 0.6 (petroleum ether)

**<sup>1</sup>H NMR (400 MHz, CDCl<sub>3</sub>)**  $\delta$  7.28 (d,  $J$  = 7.0 Hz, 2H), 7.25 (s, 1H), 7.17 (dd,  $J$  = 8.9, 2.3 Hz, 2H), 7.11 (d,  $J$  = 6.8 Hz, 2H), 6.88 (d,  $J$  = 8.8 Hz, 2H), 6.44 (s, 1H), 5.84 (td,  $J$  = 56.4, 5.7 Hz, 1H), 3.82 (s, 3H), 3.58 (dt,  $J$  = 11.0, 5.4 Hz, 1H), 2.79 – 2.56 (m, 2H), 2.06 – 1.97 (m, 1H), 1.91 – 1.81 (m, 1H).

**<sup>13</sup>C NMR (101 MHz, CDCl<sub>3</sub>)**  $\delta$  159.7, 141.4, 131.0, 129.7, 128.6, 128.5, 126.2, 117.03 (t,  $J$  = 244.1 Hz), 114.0, 110.5, 55.5, 47.8 (t,  $J$  = 21.1 Hz), 33.2, 29.8, 28.2.

**<sup>19</sup>F NMR (376 MHz, CDCl<sub>3</sub>)**  $\delta$  -105.08 – -133.33 (m).

**HRMS (EI)**  $m/z$  calcd for C<sub>19</sub>H<sub>19</sub>BrF<sub>2</sub>O [M<sup>+</sup>]: 380.0587, found: 381.0620.

## 6. General Procedure for the Synthesis of the Product

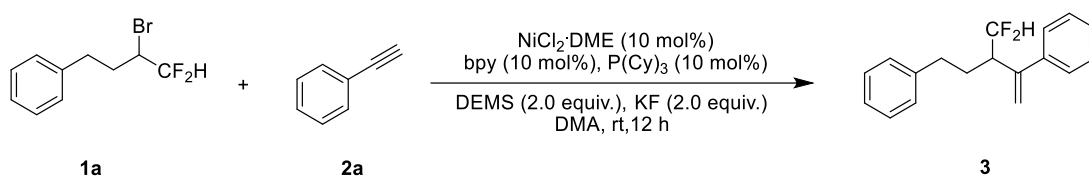

**Procedure A:** Product **3** as an example: to an oven-dried 8 mL screw-cap vial equipped with a magnetic stir bar was charged with NiCl<sub>2</sub>·DME (4.4 mg, 0.02 mmol, 10 mol%), and bipyridyl (3.1 mg, 0.02 mmol, 10 mol%), P(Cy)<sub>3</sub> (5.6 mg, 0.02 mmol, 10 mol%), KF (23.1 mg, 0.4 mmol, 2.0 equiv.). The tube was sealed with a Teflon-lined screw cap. After evacuated and backfilled with nitrogen three times, alkyne **2a** (0.3 mmol, 1.5 equiv.), DEMS (53.6 mg, 0.4 mmol, 2.0 equiv.) and N, N-Dimethylacetamide (0.3 mL) were added via a syringe followed by addition of **1a** (68.1

mg, 0.2 mmol, 1.0 equiv.). The reaction mixture was allowed to stir for 12 h under N<sub>2</sub> atmosphere at rt. After the reaction was completed, the mixture was diluted with EtOAc (3 × 10 mL), washed with H<sub>2</sub>O and brine. The organic layer was combined, dried over Na<sub>2</sub>SO<sub>4</sub>, filtered and concentrated. The crude product was purified by flash column chromatography.

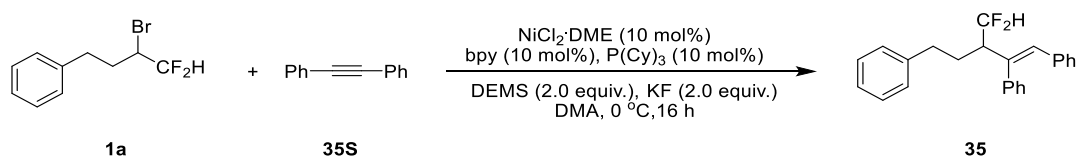

**Procedure B:** Product **35** as an example: to an oven-dried 8 mL screw-cap vial equipped with a magnetic stir bar was charged with NiCl<sub>2</sub>·DME (4.4 mg, 0.02 mmol, 10 mol%), and bpy (3.1 mg, 0.02 mmol, 10 mol%), P(Cy)<sub>3</sub> (5.6 mg, 0.02 mmol, 10 mol%), KF (23.0 mg, 0.4 mmol, 2.0 equiv.), The tube was sealed with a Teflon-lined screw cap. After evacuated and backfilled with nitrogen three times, alkyne **35S** (0.3 mmol, 1.5 equiv.), DEMS (53.6 mg, 0.4 mmol, 2.0 equiv.) and N, N-Dimethylacetamide (0.3 mL) were added via a syringe followed by addition of **1a** (68.1 mg, 0.2 mmol, 1.0 equiv.). The reaction mixture was allowed to stir for 12 h under N<sub>2</sub> atmosphere at 0 °C. After the reaction was completed, the mixture was diluted with EtOAc (3 × 10 mL), washed with H<sub>2</sub>O and brine. The organic layer was combined, dried over Na<sub>2</sub>SO<sub>4</sub>, filtered and concentrated. The crude product was purified by flash column chromatography.

## 7. Characterization of Products

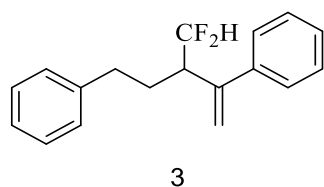

(3-(difluoromethyl)pent-4-ene-1,4-diyl)dibenzene (**3**) (44.0 mg, 81%); colorless liquid.  $R_f$  = 0.5 (petroleum ether: ethyl acetate, 100:1, v/v)

<sup>1</sup>H NMR (400 MHz, CDCl<sub>3</sub>) δ 7.36 – 7.34 (m, 1H), 7.33 (d,  $J$  = 1.6 Hz, 3H), 7.32 (d,

$J = 1.9$  Hz, 1H), 7.27 (d,  $J = 6.9$  Hz, 1H), 7.25 (d,  $J = 1.6$  Hz, 1H), 7.20 (d,  $J = 7.2$  Hz, 1H), 7.11 (d,  $J = 7.0$  Hz, 2H), 5.78 (td,  $J = 56.6, 4.4$  Hz, 1H), 5.57 (s, 1H), 5.32 (s, 1H), 3.10 – 2.95 (m, 1H), 2.83 – 2.75 (m, 1H), 2.66 – 2.54 (m, 1H), 2.20 – 2.08 (m, 1H), 2.02 – 1.89 (m, 1H).

**$^{13}\text{C}$  NMR (101 MHz,  $\text{CDCl}_3$ )**  $\delta$  145.4 (t,  $J = 4.3$  Hz), 142.1, 141.4, 128.5, 128.5, 127.8, 126.6, 126.1, 117.9 (t,  $J = 244.9$  Hz), 116.3, 47.5 (t,  $J = 19.9$  Hz), 32.9, 30.0 (t,  $J = 4.0$  Hz).

**$^{19}\text{F}$  NMR (376 MHz,  $\text{CDCl}_3$ )**  $\delta$  -116.89 – -123.41 (m).

**HRMS (ESI)**  $m/z$  calcd for  $\text{C}_{18}\text{H}_{18}\text{F}_2$  [ $\text{M}^+$ ]: 272.1371, found:272.1368.

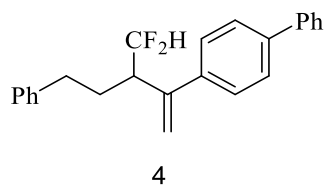

4-(3-(difluoromethyl)-5-phenylpent-1-en-2-yl)-1,1'-biphenyl (**4**) (53.0 mg, 76%); white solid.

$R_f$  = 0.4 (petroleum ether: ethyl acetate, 100:1, v/v)

**$^1\text{H}$  NMR (400 MHz,  $\text{CDCl}_3$ )**  $\delta$  7.63 – 7.57 (m, 4H), 7.47 (t,  $J = 7.7$  Hz, 2H), 7.43 – 7.36 (m, 3H), 7.29 (d,  $J = 6.9$  Hz, 1H), 7.26 – 7.18 (m, 2H), 7.15 – 7.12 (m, 2H), 5.82 (td,  $J = 56.6, 4.4$  Hz, 1H), 5.65 (s, 1H), 5.35 (s, 1H), 3.09 (dd,  $J = 9.9, 3.9$  Hz, 1H), 2.81 (td,  $J = 9.5, 4.9$  Hz, 1H), 2.72 – 2.63 (m, 1H),  $\delta$  2.25 – 2.14 (m, 1H), 2.07 – 1.92 (m, 1H).

**$^{13}\text{C}$  NMR (101 MHz,  $\text{CDCl}_3$ )**  $\delta$  145.0 (t,  $J = 4.3$  Hz), 141.5, 141.1, 140.8, 140.7, 129.0, 128.6, 127.6, 127.3, 127.2, 127.1, 126.2, 118.0 (t,  $J = 244.3$  Hz), 116.3, 47.5 (t,  $J = 19.8$  Hz), 33.0, 30.2 (t,  $J = 3.9$  Hz), 29.9.

**$^{19}\text{F}$  NMR (376 MHz,  $\text{CDCl}_3$ )**  $\delta$  -116.36 – -126.80 (m).

**HRMS (EI)**  $m/z$  calcd for  $\text{C}_{24}\text{H}_{22}\text{F}_2$  [ $\text{M}^+$ ]: 348.1684, found:348.1680.

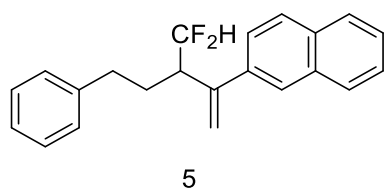

2-(3-(difluoromethyl)-5-phenylpent-1-en-2-yl)naphthalene (**5**) (54.3 mg, 84%); white solid.

**R<sub>f</sub>**=0.4 (petroleum ether: ethyl acetate, 100:1, v/v)

**<sup>1</sup>H NMR (400 MHz, CDCl<sub>3</sub>)** δ 7.88 – 7.79 (m, 3H), 7.72 (s, 1H), 7.55 – 7.44 (m, 3H), 7.28 (d, *J* = 6.8 Hz, 2H), 7.22 (d, *J* = 7.1 Hz, 1H), 7.14 (d, *J* = 6.9 Hz, 2H), 5.85 (td, *J* = 56.6, 4.3 Hz, 1H), 5.72 (s, 1H), 5.43 (s, 1H), 3.29 – 3.11 (m, 1H), 2.93 – 2.78 (m, 1H), 2.74 – 2.62 (m, 1H), 2.30 – 2.13 (m, 1H), 2.09 – 1.95 (m, 1H).

**<sup>13</sup>C NMR (101 MHz, CDCl<sub>3</sub>)** δ 145.4 (t, *J* = 4.3 Hz), 141.4, 139.4, 133.4, 133.0, 128.6, 128.6, 128.3, 128.3, 127.7, 126.5, 126.3, 126.2, 125.4, 125.0, 118.1 (t, *J* = 245.4 Hz), 116.8, 47.4 (t, *J* = 19.8 Hz), 33.0, 30.1 (t, *J* = 4.0 Hz).

**<sup>19</sup>F NMR (376 MHz, CDCl<sub>3</sub>)** δ -116.61 – -123.60 (m).

**HRMS (EI)** *m/z* calcd for C<sub>22</sub>H<sub>20</sub>F<sub>2</sub>[M<sup>+</sup>]: 322.1528, found:322.1524.

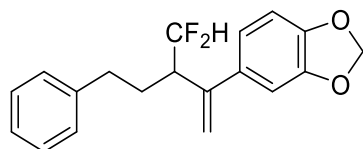

6

5-(3-(difluoromethyl)-5-phenylpent-1-en-2-yl)benzo[d][1,3]dioxole (**6**) (52.2 mg, 83%); colorless liquid.

**R<sub>f</sub>**=0.3 (petroleum ether: ethyl acetate, 100:1, v/v)

**<sup>1</sup>H NMR (400 MHz, CDCl<sub>3</sub>)** δ 7.28 (t, *J* = 6.6 Hz, 2H), 7.20 (t, *J* = 7.2 Hz, 1H), 7.13 (d, *J* = 6.9 Hz, 2H), 6.85 – 6.76 (m, 3H), 5.98 (s, 2H), 5.77 (td, *J* = 56.6, 4.5 Hz, 1H), 5.49 (s, 1H), 5.24 (s, 1H), 3.03 – 2.89 (m, 1H), 2.82 – 2.70 (m, 1H), 2.68 – 2.55 (m, 1H), 2.25 – 2.09 (m, 1H), 2.01 – 1.88 (m, 1H).

**<sup>13</sup>C NMR (101 MHz, CDCl<sub>3</sub>)** δ 147.9, 147.4, 145.0 (t, *J* = 4.3 Hz), 141.5, 136.5, 128.6, 128.6, 126.2, 120.2, 118.0 (t, *J* = 244.9 Hz), 115.5, 108.3, 107.3, 101.3, 47.8 (t, *J* = 19.8 Hz), 32.9, 30.1 (t, *J* = 4.0 Hz).

**<sup>19</sup>F NMR (376 MHz, CDCl<sub>3</sub>)** δ -115.95 – -124.57 (m).

**HRMS (EI)** *m/z* calcd for C<sub>19</sub>H<sub>18</sub>F<sub>2</sub>O<sub>2</sub>[M<sup>+</sup>]: 316.1275, found: 316.1270.



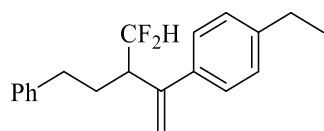

7

1-(3-(difluoromethyl)-5-phenylpent-1-en-2-yl)-4-ethylbenzene (**7**) (38.2 mg, 64%); colorless liquid.

**R<sub>f</sub>**=0.5 (petroleum ether: ethyl acetate, 100:1, v/v)

**<sup>1</sup>H NMR (400 MHz, CDCl<sub>3</sub>)** δ 7.28 (d, *J* = 1.2 Hz, 1H), 7.26 – 7.23 (m, 3H), 7.23 – 7.14 (m, 3H), 7.11 (d, *J* = 6.9 Hz, 2H), 5.77 (td, *J* = 56.6, 4.4 Hz, 1H), 5.54 (s, 1H), 5.27 (s, 1H), 3.10 – 2.94 (m, 1H), 2.83 – 2.70 (m, 1H), 2.69 – 2.56 (m, 3H), 2.20 – 2.09 (m, 1H), 2.02 – 1.85 (m, 1H), 1.25 (t, *J* = 7.5 Hz, 3H).

**<sup>13</sup>C NMR (101 MHz, CDCl<sub>3</sub>)** δ 145.3 (t, *J* = 4.4 Hz), 144.1, 141.6, 139.5, 128.6, 128.6, 128.1, 126.6, 126.2, 118.0 (t, *J* = 244.5 Hz), 115.7, 47.6 (t, *J* = 19.8 Hz), 33.0, 30.1 (t, *J* = 4.0 Hz), 28.6, 15.7.

**<sup>19</sup>F NMR (376 MHz, CDCl<sub>3</sub>)** δ -109.25 – -132.61 (m).

**HRMS (EI)** *m/z* calcd for C<sub>20</sub>H<sub>22</sub>F<sub>2</sub>[M<sup>+</sup>]: 300.1684, found:300.1680.

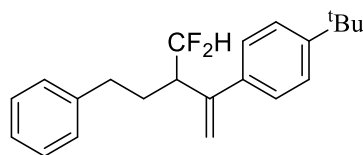

8

1-(tert-butyl)-4-(3-(difluoromethyl)-5-phenylpent-1-en-2-yl)benzene (**8**) (50.0 mg, 76%); white solid.

**R<sub>f</sub>**=0.6 (petroleum ether)

**<sup>1</sup>H NMR (400 MHz, CDCl<sub>3</sub>)** δ 7.40 – 7.33 (m, 2H), 7.29 – 7.26 (m, 3H), 7.25 (s, 1H), 7.20 (d, *J* = 7.1 Hz, 1H), 7.11 (d, *J* = 7.0 Hz, 2H), 5.78 (td, *J* = 56.6, 4.3 Hz, 1H), 5.57 (s, 1H), 5.28 (s, 1H), 3.12 – 2.94 (m, 1H), 2.87 – 2.70 (m, 1H), 2.69 – 2.51 (m, 1H), 2.26 – 2.10 (m, 1H), 2.04 – 1.81 (m, 1H), 1.34 (s, 9H).

**<sup>13</sup>C NMR (101 MHz, CDCl<sub>3</sub>)** δ 150.8, 145.1 (t, *J* = 4.3 Hz), 141.5, 139.0, 128.5, 128.4, 126.2, 126.0, 125.4, 117.9 (t, *J* = 245.4 Hz), 115.6, 47.4 (t, *J* = 19.7 Hz), 34.6, 32.9, 31.3, 29.9 (t, *J* = 3.9 Hz).

**<sup>19</sup>F NMR (376 MHz, CDCl<sub>3</sub>)** δ -116.64 – -123.67 (m).

**HRMS (EI)** *m/z* calcd for C<sub>22</sub>H<sub>26</sub>F<sub>2</sub>[(M+H)<sup>+</sup>]: 328.1997, found:328.1992.

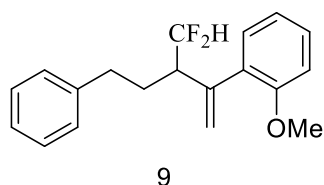

1-(3-(difluoromethyl)-5-phenylpent-1-en-2-yl)-2-methoxybenzene (**9**) (36.1 mg, 61%); colorless liquid.

**R<sub>f</sub>**=0.5 (petroleum ether: ethyl acetate, 100:1, v/v)

**<sup>1</sup>H NMR (400 MHz, CDCl<sub>3</sub>)** δ 7.34 – 7.25 (m, 2H), 7.24 (s, 1H), 7.20 – 7.16 (m, 2H), 7.13 (d, *J* = 6.9 Hz, 2H), 6.95 (td, *J* = 7.4, 1.1 Hz, 1H), 6.87 (d, *J* = 8.2 Hz, 1H), 5.89 (td, *J* = 57.0, 3.1 Hz, 1H), 5.41 (s, 1H), 5.35 (s, 1H), 3.76 (s, 3H), 3.12 – 2.92 (m, 1H), 2.85 – 2.76 (m, 1H), 2.69 – 2.58 (m, 1H), 2.20 – 2.06 (m, 1H), 2.04 – 1.84 (m, 1H).

**<sup>13</sup>C NMR (101 MHz, CDCl<sub>3</sub>)** δ 156.5, 145.4 (dd, *J* = 7.7, 2.4 Hz), 142.2, 132.2, 130.5, 129.2, 128.5, 128.5, 126.0, 120.9, 118.0, 117.9 (t, *J* = 244.4 Hz), 110.7, 55.3, 47.7 (t, *J* = 19.7 Hz), 33.3, 29.4 (dd, *J* = 5.1, 2.7 Hz).

**<sup>19</sup>F NMR (376 MHz, CDCl<sub>3</sub>)** δ -106.35 – -135.96 (m).

**HRMS (EI)** *m/z* calcd for C<sub>19</sub>H<sub>20</sub>F<sub>2</sub>O[M<sup>+</sup>]: 302.1482, found: 302.1478.

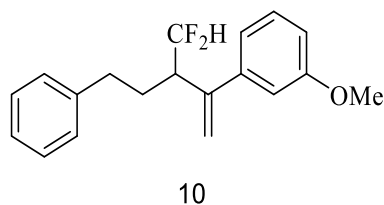

1-(3-(difluoromethyl)-5-phenylpent-1-en-2-yl)-3-methoxybenzene (**10**) (45.1 mg, 75%); colorless liquid.

**R<sub>f</sub>**=0.3 (petroleum ether)

**<sup>1</sup>H NMR (400 MHz, CDCl<sub>3</sub>)** δ 7.27 (d, *J* = 4.9 Hz, 2H), 7.24 (d, *J* = 3.5 Hz, 1H), 7.20 (d, *J* = 7.1 Hz, 1H), 7.12 (d, *J* = 7.4 Hz, 2H), 6.91 (d, *J* = 7.7 Hz, 1H), 6.85 (d, *J* = 5.1 Hz, 2H), 5.77 (td, *J* = 56.5, 4.3 Hz, 1H), 5.56 (s, 1H), 5.31 (s, 1H), 3.81 (s, 3H), 3.09 – 2.92 (m, 1H), 2.88 – 2.73 (m, 1H), 2.67 – 2.59 (m, 1H), 2.19 – 2.09 (m, 1H), 2.04 – 1.84 (m, 1H).

**<sup>13</sup>C NMR (101 MHz, CDCl<sub>3</sub>)** δ 159.7, 145.4 (t, *J* = 4.1 Hz), 143.7, 141.5, 129.6, 128.6, 128.6, 126.2, 119.2, 117.9 (t, *J* = 244.4 Hz), 116.6, 113.2, 112.6, 55.4, 47.7 (t, *J* = 19.9 Hz), 33.0, 30.0 (t, *J* = 4.0 Hz).

**<sup>19</sup>F NMR (376 MHz, CDCl<sub>3</sub>)** δ -116.48 – -124.15 (m).

**HRMS (EI)** *m/z* calcd for C<sub>19</sub>H<sub>20</sub>F<sub>2</sub>O[M<sup>+</sup>]: 302.1482, found: 302.1478.

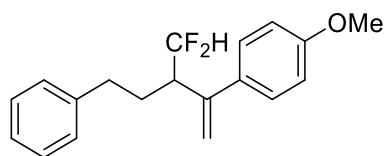

11

1-(3-(difluoromethyl)-5-phenylpent-1-en-2-yl)-4-methoxybenzene (**11**) (46.1 mg, 77%); colorless liquid.

**R<sub>f</sub>** = 0.3 (petroleum ether: ethyl acetate, 100:1, v/v)

**<sup>1</sup>H NMR (400 MHz, CDCl<sub>3</sub>)** δ 7.31 – 7.25 (m, 2H), 7.26 (s, 1H), 7.20 (t, *J* = 7.3 Hz, 2H), 7.12 (d, *J* = 6.9 Hz, 2H), 6.88 (d, *J* = 8.8 Hz, 2H), 5.77 (td, *J* = 56.6, 4.5 Hz, 1H), 5.51 (s, 1H), 5.24 (s, 1H), 3.83 (s, 3H), 3.11 – 2.90 (m, 1H), 2.84 – 2.71 (m, 1H), 2.69 – 2.52 (m, 1H), 2.23 – 2.06 (m, 1H), 2.00 – 1.88 (m, 1H).

**<sup>13</sup>C NMR (101 MHz, CDCl<sub>3</sub>)** δ 159.5, 144.8 (t, *J* = 4.4 Hz), 141.6, 134.6, 128.6, 128.6, 127.8, 126.2, 118.1 (t, *J* = 244.9 Hz), 114.9, 113.9, 55.4, 47.6 (t, *J* = 19.8 Hz), 33.0, 30.1 (t, *J* = 4.0 Hz).

**<sup>19</sup>F NMR (376 MHz, CDCl<sub>3</sub>)** δ -116.42 – -124.78 (m).

**HRMS (EI)** *m/z* calcd for C<sub>19</sub>H<sub>20</sub>F<sub>2</sub>O[M<sup>+</sup>]: 302.1482, found: 302.1478.

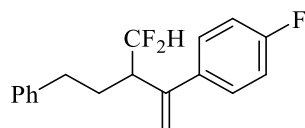

12

1-(3-(difluoromethyl)-5-phenylpent-1-en-2-yl)-4-fluorobenzene (**12**) (39.6 mg, 69%); colorless liquid.

**R<sub>f</sub>**=0.6 (petroleum ether: ethyl acetate, 100:1, v/v)

**<sup>1</sup>H NMR (400 MHz, CDCl<sub>3</sub>)** δ 7.69 – 7.60 (m, 1H), 7.31 – 7.25 (m, 1H), 7.25 (d, *J* = 3.4 Hz, 1H), 7.22 – 7.13 (m, 2H), 7.09 (d, *J* = 7.0 Hz, 2H), 7.07 – 6.96 (m, 2H), 5.76 (td, *J* = 56.6, 4.5 Hz, 1H), 5.52 (s, 1H), 5.30 (s, 1H), 3.07 – 2.87 (m, 1H), 2.82 – 2.69 (m, 1H), 2.66 – 2.53 (m, 1H), 2.19 – 2.07 (m, 1H), 2.00 – 1.81 (m, 1H).

**<sup>13</sup>C NMR (101 MHz, CDCl<sub>3</sub>)** δ 163.8, 161.4, 144.6 (t, *J* = 4.2 Hz), 141.3, 128.6 (d, *J* = 5.9 Hz), 128.4 (d, *J* = 7.9 Hz), 126.3, 118.0 (t, *J* = 244.2 Hz), 116.5, 115.6, 115.4, 47.7 (t, *J* = 19.9 Hz), 32.9, 30.2 (t, *J* = 4.0 Hz).

**<sup>19</sup>F NMR (376 MHz, CDCl<sub>3</sub>)** δ -114.48 – -115.30 (m), -117.35 – -123.06 (m).

**HRMS (EI)** *m/z* calcd for C<sub>18</sub>H<sub>17</sub>F<sub>3</sub>[M<sup>+</sup>]: 290.1227, found: 290.1221.

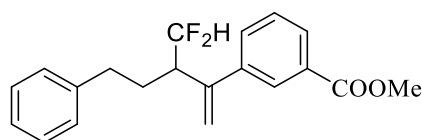

13

methyl 4-(3-(difluoromethyl)-5-phenylpent-1-en-2-yl)benzoate (**13**) (27.6 mg, 42%); colorless liquid.

**R<sub>f</sub>**=0.5 (petroleum ether: ethyl acetate, 30:1, v/v)

**<sup>1</sup>H NMR (400 MHz, CDCl<sub>3</sub>)** δ 8.04 – 7.95 (m, 1H), 7.49 (dt, *J* = 7.7, 1.5 Hz, 1H), 7.41 (t, *J* = 7.7 Hz, 1H), 7.28 (d, *J* = 1.3 Hz, 2H), 7.24 (d, *J* = 1.4 Hz, 2H), 7.23 – 7.15 (m, 1H), 7.10 (d, *J* = 6.8 Hz, 1H), 5.78 (td, *J* = 56.4, 4.4 Hz, 1H), 5.62 (s, 1H), 5.38 (s, 1H), 3.93 (s, 3H), 3.14 – 2.95 (m, 1H), 2.82 – 2.72 (m, 1H), 2.66 – 2.54 (m, 1H), 2.25 – 2.10 (m, 1H), 2.02 – 1.82 (m, 1H).

**$^{13}\text{C}$  NMR (101 MHz,  $\text{CDCl}_3$ )**  $\delta$  167.0, 144.7 (t,  $J = 4.3$  Hz), 142.6, 141.3, 131.2, 130.6, 129.0, 128.8, 128.6, 128.5, 127.8, 126.3, 117.9 (t,  $J = 245.4$  Hz), 117.5, 52.4, 47.6 (t,  $J = 20.2$  Hz), 32.9, 30.2 (t,  $J = 3.8$  Hz).

**$^{19}\text{F}$  NMR (376 MHz,  $\text{CDCl}_3$ )**  $\delta$  -109.90 – -137.52 (m).

**HRMS (EI)**  $m/z$  calcd for  $\text{C}_{20}\text{H}_{20}\text{F}_2\text{O}_2[\text{M}^+]$ : 330.1426, found: 330.1423.

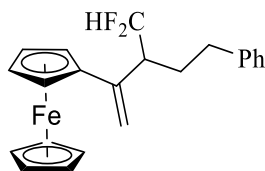

14

Ferrocene, (3-(difluoromethyl)-5-phenylpent-1-en-2-yl) (**14**) (54.7 mg, 72%); darkness red solid.

$R_f$  = 0.3 (petroleum ether, v/v)

**$^1\text{H}$  NMR (400 MHz,  $\text{CDCl}_3$ )**  $\delta$  7.31 (t,  $J = 7.5$  Hz, 2H), 7.25 - 7.18 (m, 3H), 5.92 (td,  $J = 56.7, 4.1$  Hz, 1H), 5.56 (s, 1H), 5.13 (s, 1H), 4.36 (s, 1H), 4.30 – 4.23 (m, 3H), 4.10 (s, 5H), 2.96 – 2.83 (m, 1H), 2.81 – 2.65 (m, 2H), 2.27 – 2.11 (m, 1H), 2.01 – 1.85 (m, 1H).

**$^{13}\text{C}$  NMR (101 MHz,  $\text{CDCl}_3$ )**  $\delta$  142.6 (t,  $J = 3.9$  Hz), 141.6, 128.5, 126.1, 118.1 (t,  $J = 244.7$  Hz), 111.4, 86.2, 69.3, 68.9, 68.9, 66.2, 66.1, 46.6 (t,  $J = 19.8$  Hz), 33.4, 30.5 (t,  $J = 4.0$  Hz).

**$^{19}\text{F}$  NMR (376 MHz,  $\text{CDCl}_3$ )**  $\delta$  -113.93 – -125.30 (m).

**HRMS (EI)**  $m/z$  calcd for  $\text{C}_{22}\text{H}_{22}\text{F}_2\text{Fe}[\text{M}^+]$ : 380.1034, found: 380.1031.

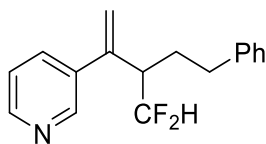

15

3-(3-(difluoromethyl)-5-phenylpent-1-en-2-yl)pyridine (**15**) (27.1 mg, 51%); yellow oil.

$R_f$  = 0.4 (petroleum ether: ethyl acetate, 100:1, v/v)

**<sup>1</sup>H NMR (400 MHz, CDCl<sub>3</sub>)** δ 8.69 (s, 1H), 7.58 (d, *J* = 7.9 Hz, 1H), 7.30 – 7.23 (m, 4H), 7.22 – 7.16 (m, 1H), 7.12 – 7.08 (m, 2H), 5.78 (td, *J* = 56.4, 4.5 Hz, 1H), 5.62 (s, 1H), 5.43 (s, 1H), 3.05 – 2.91 (m, 1H), 2.96 – 2.83 (m, 1H), 2.81 – 2.65 (m, 1H), 2.27 – 2.11 (m, 1H), 2.01 – 1.85 (m, 1H).

**<sup>13</sup>C NMR (101 MHz, CDCl<sub>3</sub>)** δ 148.8, 142.5, 140.9, 134.0, 128.7, 128.5, 126.4, 118.6, 117.8 (t, *J* = 244.6 Hz), 47.5 (t, *J* = 19.9 Hz), 32.8, 30.1 (t, *J* = 3.9 Hz).

**<sup>19</sup>F NMR (376 MHz, CDCl<sub>3</sub>)** δ -117.22 – -122.46 (m).

**HRMS (EI)** *m/z* calcd for C<sub>17</sub>H<sub>17</sub>F<sub>2</sub>N[M<sup>+</sup>]: 273.1329, found: 273.1323.

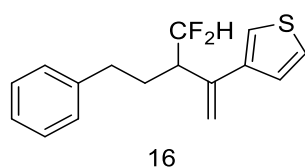

3-(3-(difluoromethyl)-5-phenylpent-1-en-2-yl)thiophene (**16**) (36.9 mg, 67%); yellow oil.

**R<sub>f</sub>** = 0.6 (petroleum ether: ethyl acetate, 100:1, v/v)

**<sup>1</sup>H NMR (400 MHz, CDCl<sub>3</sub>)** δ 7.28 (d, *J* = 6.9 Hz, 1H), 7.25 (s, 1H), 7.24 – 7.17 (m, 2H), 7.17 – 7.10 (m, 2H), 7.03 – 6.93 (m, 2H), 5.82 (td, *J* = 56.6, 4.2 Hz, 1H), 5.73 (s, 1H), 5.22 (s, 1H), 3.14 – 2.95 (m, 1H), 2.82 – 2.71 (m, 1H), 2.68 – 2.56 (m, 1H), 2.26 – 2.11 (m, 1H), 2.08 – 1.93 (m, 1H).

**<sup>13</sup>C NMR (101 MHz, CDCl<sub>3</sub>)** δ 145.1, 141.4, 138.1 (t, *J* = 4.4 Hz), 128.6, 128.6, 127.7, 126.2, 125.1, 124.0, 117.6 (t, *J* = 245.9 Hz), 114.7, 47.7 (t, *J* = 20.2 Hz), 32.9, 29.6 (t, *J* = 3.9 Hz).

**<sup>19</sup>F NMR (376 MHz, CDCl<sub>3</sub>)** δ -116.58 – -123.45 (m).

**HRMS (EI)** *m/z* calcd for C<sub>16</sub>H<sub>16</sub>F<sub>2</sub>S[M<sup>+</sup>]: 278.0941, found: 278.0934.

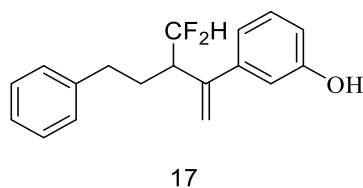

3-(3-(difluoromethyl)-5-phenylpent-1-en-2-yl)phenol (**17**) (38.7 mg, 67%); yellow oil.

**R<sub>f</sub>**=0.4 (petroleum ether: ethyl acetate, 10:1, v/v)

**<sup>1</sup>H NMR (400 MHz, CDCl<sub>3</sub>)** δ 7.29 (d, *J* = 7.2 Hz, 2H), 7.25 – 7.17 (m, 2H), 7.12 (d, *J* = 7.2 Hz, 2H), 6.90 (d, *J* = 7.7 Hz, 1H), 6.78 (dd, *J* = 7.9, 2.6 Hz, 1H), 6.73 (t, *J* = 2.2 Hz, 1H), 5.78 (td, *J* = 56.5, 4.4 Hz, 1H), 5.56 (s, 1H), 5.30 (s, 1H), 4.85 (s, 1H), 3.08 – 2.92 (m, 1H), 2.83 – 2.71 (m, 1H), 2.68 – 2.53 (m, 1H), 2.31 – 2.09 (m, 1H), 2.03 – 1.86 (m, 1H).

**<sup>13</sup>C NMR (101 MHz, CDCl<sub>3</sub>)** δ 155.7, 145.1 (t, *J* = 4.3 Hz), 143.9, 141.5, 129.8, 128.6, 128.6, 126.2, 119.3, 118.0 (t, *J* = 244.2 Hz), 116.5, 114.8, 113.7, 47.5 (t, *J* = 20.0 Hz), 33.0, 30.1 (t, *J* = 4.0 Hz).

**<sup>19</sup>F NMR (376 MHz, CDCl<sub>3</sub>)** δ -115.02 – -128.86 (m).

**HRMS (EI)** *m/z* calcd for C<sub>18</sub>H<sub>18</sub>F<sub>2</sub>O[M<sup>+</sup>]: 288.1320, found: 288.1324.

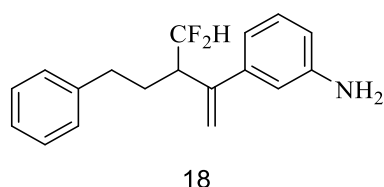

3-(3-(difluoromethyl)-5-phenylpent-1-en-2-yl)aniline (**18**) (49.5 mg, 86%); yellow liquid.

**R<sub>f</sub>**=0.6 (petroleum ether: ethyl acetate, 10:1, v/v)

**<sup>1</sup>H NMR (400 MHz, CDCl<sub>3</sub>)** δ 7.44 (d, *J* = 7.0 Hz, 1H), 7.41 (s, 1H), 7.39 – 7.31 (m, 1H), 7.33 – 7.24 (m, 3H), 6.88 (d, *J* = 7.9 Hz, 1H), 6.81 – 6.77 (m, 1H), 6.74 (t, *J* = 2.0 Hz, 1H), 5.92 (td, *J* = 56.6, 4.3 Hz, 1H), 5.69 (s, 1H), 5.42 (s, 1H), 3.84 (s, 2H), 3.21 – 3.06 (m, 1H), 3.00 – 2.89 (m, 1H), 2.84 – 2.70 (m, 1H), 2.36 – 2.24 (m, 1H), 2.15 – 1.97 (m, 1H).

**<sup>13</sup>C NMR (101 MHz, CDCl<sub>3</sub>)** δ 146.5, 145.6 (t, *J* = 4.1 Hz), 143.4, 141.6, 129.5, 128.6, 128.6, 126.1, 118.0 (t, *J* = 244.9 Hz), 117.2, 116.0, 114.7, 113.5, 47.6 (t, *J* = 19.8 Hz), 33.0, 29.8 (t, *J* = 4.0 Hz).

**<sup>19</sup>F NMR (376 MHz, CDCl<sub>3</sub>)** δ -115.53 – -124.53 (m).

**HRMS (EI)** *m/z* calcd for C<sub>18</sub>H<sub>19</sub>F<sub>2</sub>N[M<sup>+</sup>]: 287.1486, found: 287.1479.

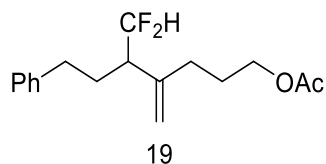

5-(difluoromethyl)-4-methylene-7-phenylheptyl acetate (**19**) (51.0 mg, 86%); colorless liquid.

**R<sub>f</sub>**=0.7 (petroleum ether)

**<sup>1</sup>H NMR (400 MHz, CDCl<sub>3</sub>)** δ 7.25 – 7.21 (m, 2H), 7.18 – 7.14 (m, 1H), 7.12 (d, *J* = 7.7 Hz, 2H), 5.64 (td, *J* = 56.7, 4.6 Hz, 1H), 5.05 (s, 1H), 4.99 (s, 1H), 4.05 (t, *J* = 6.5 Hz, 2H), 2.64 (td, *J* = 9.8, 5.0 Hz, 1H), 2.54 – 2.39 (m, 2H), 2.10 – 2.02 (m, 2H), 2.01 (s, 3H), 1.99 – 1.90 (m, 1H), 1.81 – 1.71 (m, 3H).

**<sup>13</sup>C NMR (101 MHz, CDCl<sub>3</sub>)** δ 171.3, 144.1 (t, *J* = 3.8 Hz), 141.5, 128.6, 128.5, 126.2, 118.2 (t, *J* = 244.5 Hz), 114.1, 64.0, 49.4 (t, *J* = 19.3 Hz), 33.0, 31.6, 28.9 (t, *J* = 4.0 Hz), 26.5.

**<sup>19</sup>F NMR (376 MHz, CDCl<sub>3</sub>)** δ -117.37 – -121.87 (m).

**HRMS (EI)** *m/z* calcd for C<sub>17</sub>H<sub>23</sub>F<sub>2</sub>O<sub>2</sub>[M<sup>+</sup>]: 296.1582, found:296.1587.

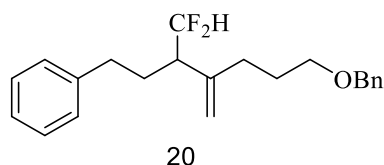

(7-(benzyloxy)-3-(difluoromethyl)-4-methyleneheptyl)benzene (**20**) (48.1 mg, 70%); colorless liquid.

**R<sub>f</sub>**=0.6 (petroleum ether)

**<sup>1</sup>H NMR (400 MHz, CDCl<sub>3</sub>)** δ 7.31 (t, *J* = 3.8 Hz, 4H), 7.26 – 7.21 (m, 3H), 7.17 (dd, *J* = 7.1, 2.4 Hz, 1H), 7.13 (d, *J* = 7.6 Hz, 2H), 5.65 (td, *J* = 56.8, 4.3 Hz, 1H), 5.05 (s, 1H), 4.97 (s, 1H), 4.48 (d, *J* = 2.8 Hz, 2H), 3.50 – 3.45 (m, 2H), 2.71 – 2.58 (m, 1H), 2.53 – 2.37 (m, 2H), 2.19 – 2.03 (m, 2H), 2.02 – 1.89 (m, 1H), 1.85 – 1.67 (m, 3H).



**$^{13}\text{C}$  NMR (101 MHz,  $\text{CDCl}_3$ )**  $\delta$  144.7 (t,  $J = 3.8$  Hz), 141.6, 138.6, 128.6, 128.5, 128.5, 127.8, 127.7, 118.2 (t,  $J = 245.4$  Hz), 113.8, 73.1, 69.9, 49.6 (t,  $J = 19.2$  Hz), 33.0, 31.9, 29.0 (t,  $J = 4.2$  Hz), 27.7.

**$^{19}\text{F}$  NMR (376 MHz,  $\text{CDCl}_3$ )**  $\delta$  -116.48 – -124.15 (m).

**HRMS (ESI)**  $m/z$  calcd for  $\text{C}_{22}\text{H}_{26}\text{F}_2\text{O}[\text{M}^+]$ : 344.1946, found: 344.1949.

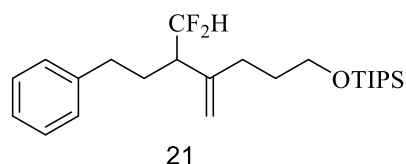

((5-(difluoromethyl)-4-methylene-7-phenylheptyl)oxy)triisopropylsilane (**21**) (66.1 mg, 81%); white solid.

$R_f$  = 0.6 (petroleum ether)

**$^1\text{H}$  NMR (400 MHz,  $\text{CDCl}_3$ )**  $\delta$  7.28 (t,  $J = 7.3$  Hz, 2H), 7.22 – 7.15 (m, 3H), 5.70 (td,  $J = 56.7, 4.7$  Hz, 1H), 5.10 (s, 1H), 5.00 (s, 1H), 3.72 (t,  $J = 6.2$  Hz, 2H), 2.74 – 2.63 (m, 1H), 2.60 – 2.41 (m, 2H), 2.25 – 2.06 (m, 2H), 2.04 – 1.94 (m, 1H), 1.90 – 1.79 (m, 1H), 1.76 – 1.64 (m, 2H), 1.06 (d,  $J = 4.7$  Hz, 21H).

**$^{13}\text{C}$  NMR (101 MHz,  $\text{CDCl}_3$ )**  $\delta$  145.0 (t,  $J = 3.8$  Hz), 141.7, 128.6, 128.5, 126.1, 118.2 (t,  $J = 244.3$  Hz), 113.7, 62.9, 49.7 (t,  $J = 19.2$  Hz), 33.1, 31.5, 31.0, 29.0 (t,  $J = 4.2$  Hz), 18.2, 12.1.

**$^{19}\text{F}$  NMR (376 MHz,  $\text{CDCl}_3$ )**  $\delta$  -112.81 – -134.61 (m).

**HRMS (EI)**  $m/z$  calcd for  $\text{C}_{24}\text{H}_{40}\text{F}_2\text{OSi}[\text{M}^+]$ : 410.2811, found: 410.2814.

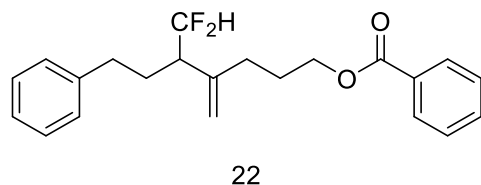

5-(difluoromethyl)-4-methylene-7-phenylheptyl benzoate (**22**) (57.3 mg, 80%); colorless liquid.

$R_f$  = 0.4 (petroleum ether: ethyl acetate, 30:1, v/v)

**<sup>1</sup>H NMR (400 MHz, CDCl<sub>3</sub>)** δ 8.02 (d, *J* = 7.3 Hz, 2H), 7.54 (t, *J* = 7.4 Hz, 1H), 7.42 (t, *J* = 7.7 Hz, 2H), 7.24 – 7.22 (m, 2H), 7.19 – 7.08 (m, 3H), 5.68 (td, *J* = 56.7, 4.6 Hz, 1H), 5.12 (s, 1H), 5.04 (s, 1H), 4.34 (t, *J* = 6.5 Hz, 2H), 2.73 – 2.63 (m, 1H), 2.59 – 2.44 (m, 2H), 2.30 – 2.09 (m, 2H), 2.06 – 1.89 (m, 3H), 1.86 – 1.76 (m, 1H).

**<sup>13</sup>C NMR (101 MHz, CDCl<sub>3</sub>)** δ 166.7, 144.1 (t, *J* = 3.8 Hz), 141.5, 133.1, 130.4, 129.7, 128.6, 128.5, 128.5, 126.1, 118.2 (t, *J* = 244.5 Hz), 114.3, 64.5, 49.4 (t, *J* = 19.2 Hz), 33.00, 31.7, 29.04 (t, *J* = 4.3 Hz), 26.7.

**<sup>19</sup>F NMR (376 MHz, CDCl<sub>3</sub>)** δ -115.73 – -133.05 (m).

**HRMS (ESI)** *m/z* calcd for C<sub>22</sub>H<sub>25</sub>F<sub>2</sub>O<sub>2</sub>[(M+H)<sup>+</sup>]: 359.1817, found: 359.1825.

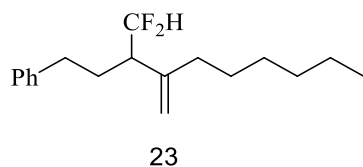

1-(3-(difluoromethyl)-5-phenylpent-1-en-2-yl)-4-ethylbenzene (**23**)<sup>[1]</sup> (35.4 mg, 64%); colorless liquid.

**R<sub>f</sub>** = 0.6 (petroleum ether)

**<sup>1</sup>H NMR (400 MHz, CDCl<sub>3</sub>)** δ 7.29 (t, *J* = 7.4 Hz, 2H), 7.19 (m, 3H), 5.69 (td, *J* = 56.8, 4.7 Hz, 1H), 5.07 (s, 1H), 4.98 (s, 1H), 2.75 – 2.63 (m, 1H), 2.60 – 2.50 (m, 1H), 2.52 – 2.38 (m, 1H), 2.10 – 1.94 (m, 3H), 1.87 – 1.72 (m, 1H), 1.53 – 1.41 (m, 2H), 1.37 – 1.24 (m, 6H), 0.95 – 0.87 (m, 3H).

**<sup>13</sup>C NMR (101 MHz, CDCl<sub>3</sub>)** δ 145.4 (t, *J* = 3.8 Hz), 141.7, 128.6, 128.5, 126.1, 118.3 (t, *J* = 244.4 Hz), 113.4, 49.5 (t, *J* = 19.1 Hz), 35.6, 33.1, 31.9, 29.2, 29.0 (t, *J* = 4.2 Hz), 27.5, 22.8, 14.2.

**<sup>19</sup>F NMR (376 MHz, CDCl<sub>3</sub>)** δ -116.65 – -122.42 (m).

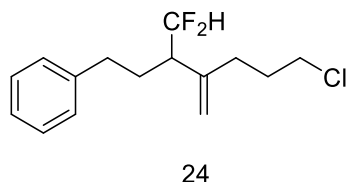

(7-chloro-3-(difluoromethyl)-4-methyleneheptyl)benzene (**24**)<sup>[1]</sup> (31.1 mg, 58%); yellow oil.

**R<sub>f</sub>**=0.3 (petroleum ether).

**<sup>1</sup>H NMR (400 MHz, CDCl<sub>3</sub>)** δ 7.29 (t, *J* = 7.4 Hz, 2H), 7.24 – 7.14 (m, 3H), 5.70 (td, *J* = 56.7, 4.7 Hz, 1H), 5.07 (d, *J* = 23.4 Hz, 1H), 3.57 (t, *J* = 6.4 Hz, 1H), 2.74 – 2.64 (m, 1H), 2.62 – 2.39 (m, 2H), 2.30 – 2.14 (m, 1H), 2.05 – 1.76 (m, 4H), 1.72 – 1.63 (m, 1H), 1.56 – 1.52 (m, 2H).

**<sup>13</sup>C NMR (101 MHz, CDCl<sub>3</sub>)** δ 143.6 (t, *J* = 3.6 Hz), 141.3, 128.5, 128.4, 126.1, 118.0 (t, *J* = 244.3 Hz), 114.3, 49.3 (t, *J* = 19.5 Hz), 44.4, 32.9, 32.3, 30.2, 29.0 (t, *J* = 4.1 Hz).

**<sup>19</sup>F NMR (377 MHz, CDCl<sub>3</sub>)** δ -103.87 – -128.72 (m).

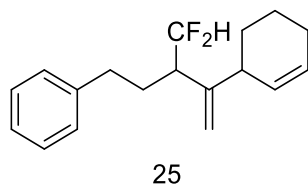

(4-(cyclohex-2-en-1-yl)-3-(difluoromethyl)pent-4-en-1-yl)benzene (**25**) (39.4 mg, 71%); colorless liquid.

**R<sub>f</sub>**=0.5 (petroleum ether, v/v).

**<sup>1</sup>H NMR (400 MHz, CDCl<sub>3</sub>)** δ 7.28 (d, *J* = 7.1 Hz, 1H), 7.26 (s, 1H), 7.19 (d, *J* = 6.9 Hz, 1H), 7.15 (d, *J* = 7.2 Hz, 2H), 5.79 (s, 1H), 5.71 (td, *J* = 56.8, 3.9 Hz, 1H), 5.31 (s, 1H), 5.03 (s, 1H), 2.99 – 2.84 (m, 1H), δ 2.74 – 2.63 (m, 1H), 2.61 – 2.49 (m, 1H), 2.23 – 2.15 (m, 3H), 2.16 – 2.08 (m, 3H), 1.92 – 1.82 (m, 1H), 1.73 – 1.66 (m, 2H), 1.62 – 1.57 (m, 1H).

**<sup>13</sup>C NMR (101 MHz, CDCl<sub>3</sub>)** δ 145.3 (dd, *J* = 5.6, 3.3 Hz), 141.9, 136.7, 128.6, 128.5, 126.1, 125.0, 118.3 (t, *J* = 244.9 Hz), 111.4, 43.8 (t, *J* = 19.5 Hz), 33.0, 30.1 (t, *J* = 4.0 Hz), 26.7, 26.0, 23.0, 22.2.

**<sup>19</sup>F NMR (376 MHz, CDCl<sub>3</sub>)** δ -115.34 – -126.14 (m).

**HRMS (EI)** *m/z* calcd for C<sub>18</sub>H<sub>22</sub>F<sub>2</sub>[M<sup>+</sup>]: 276.1684, found:276.1681.

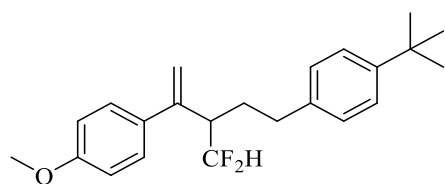

26

1-(tert-butyl)-4-(3-(difluoromethyl)-4-(4-methoxyphenyl)pent-4-en-1-yl)benzene (**26**) (55.1 mg, 77%); white solid.

$R_f$ =0.2 (petroleum ether: ethyl acetate, 100:1, v/v)

**$^1\text{H}$  NMR (400 MHz,  $\text{CDCl}_3$ )**  $\delta$  7.32 – 7.28 (m, 2H), 7.27 (d,  $J$  = 2.1 Hz, 1H), 7.25 (d,  $J$  = 2.2 Hz, 1H), 7.10 – 7.04 (m, 2H), 6.91 – 6.84 (m, 2H), 5.78 (td,  $J$  = 56.6, 4.5 Hz, 1H), 5.50 (s, 1H),  $\delta$  5.23 (s, 1H), 3.83 (s, 3H), 3.11 – 2.97 (m, 1H), 2.81 – 2.68 (m, 1H), 2.65 – 2.53 (m, 1H), 2.20 – 2.09 (m, 1H), 2.01 – 1.89 (m, 1H), 1.32 (s, 9H).

**$^{13}\text{C}$  NMR (101 MHz,  $\text{CDCl}_3$ )**  $\delta$  159.4, 149.0, 144.8 (t,  $J$  = 4.3 Hz), 138.5, 134.6, 128.2, 127.8, 125.4, 118.1 (t,  $J$  = 244.4 Hz), 114.9, 113.9, 55.4, 47.7 (t,  $J$  = 19.8 Hz), 34.5, 32.4, 31.5, 30.0 (t,  $J$  = 4.0 Hz).

**$^{19}\text{F}$  NMR (376 MHz,  $\text{CDCl}_3$ )**  $\delta$  -114.59 – -124.69 (m).

**HRMS (ESI)**  $m/z$  calcd for  $\text{C}_{23}\text{H}_{28}\text{F}_2\text{O}[\text{M}^+]$ : 358.2103, found: 358.2100.

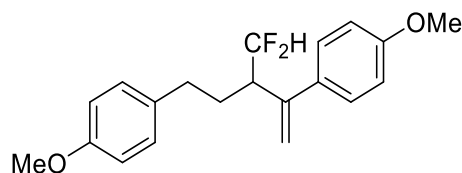

27

1-(3-(difluoromethyl)-5-phenylpent-1-en-2-yl)-4-ethylbenzene (**27**) (42.5 mg, 64%); colorless liquid.

$R_f$ =0.5 (petroleum ether: ethyl acetate, 100:1, v/v)

**$^1\text{H}$  NMR (400 MHz,  $\text{CDCl}_3$ )**  $\delta$  7.30 – 7.25 (m, 2H), 7.06 – 6.99 (m, 2H), 6.91 – 6.85 (m, 2H), 6.81 (d,  $J$  = 8.6 Hz, 2H), 5.76 (td,  $J$  = 56.7, 4.4 Hz, 1H), 5.50 (s, 1H), 5.22 (s, 1H), 3.83 (s, 3H), 3.79 (s, 3H), 3.15 – 2.95 (m, 1H), 2.78 – 2.65 (m, 1H), 2.62 – 2.46 (m, 1H), 2.19 – 2.00 (m, 1H), 1.98 – 1.81 (m, 1H).

**$^{13}\text{C}$  NMR (101 MHz,  $\text{CDCl}_3$ )**  $\delta$  159.4, 158.0, 144.8 (t,  $J = 4.4$  Hz), 134.6, 133.6, 129.5, 127.8, 118.1 (t,  $J = 244.9$  Hz), 114.9, 113.9, 55.4, 55.4, 47.5 (t,  $J = 19.7$  Hz), 32.0, 30.3 (t,  $J = 3.8$  Hz).

**$^{19}\text{F}$  NMR (376 MHz,  $\text{CDCl}_3$ )**  $\delta$  -115.01 – -129.07 (m).

**HRMS (EI)**  $m/z$  calcd for  $\text{C}_{20}\text{H}_{22}\text{F}_2\text{O}_2[\text{M}^+]$ : 332.1582, found: 332.1579.

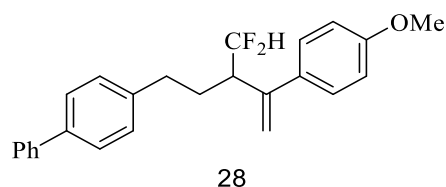

4-(3-(difluoromethyl)-4-(4-methoxyphenyl)pent-4-en-1-yl)-1,1'-biphenyl (**28**) (62.7 mg, 83%); white solid.

**R<sub>f</sub>** = 0.4 (petroleum ether: ethyl acetate, 100:1, v/v)

**$^1\text{H}$  NMR (400 MHz,  $\text{CDCl}_3$ )**  $\delta$  7.58 (d,  $J = 7.0$  Hz, 2H), 7.50 (d,  $J = 8.1$  Hz, 2H), 7.44 (t,  $J = 7.7$  Hz, 2H), 7.34 (t,  $J = 7.4$  Hz, 1H), 7.31 – 7.24 (m, 2H), 7.19 (d,  $J = 8.2$  Hz, 2H), 6.88 (d,  $J = 8.8$  Hz, 2H), 5.79 (td,  $J = 56.6, 4.4$  Hz, 1H), 5.52 (s, 1H), 5.25 (s, 1H), 3.82 (s, 3H), 3.11 – 2.95 (m, 1H), 2.89 – 2.75 (m, 1H), 2.71 – 2.58 (m, 1H), 2.27 – 2.11 (m, 1H), 2.07 – 1.90 (m, 1H).

**$^{13}\text{C}$  NMR (101 MHz,  $\text{CDCl}_3$ )**  $\delta$  159.5, 144.8 (t,  $J = 4.1$  Hz), 141.1, 140.7, 139.1, 134.5, 129.0, 128.9, 127.8, 127.3, 127.2, 127.1, 118.1 (t,  $J = 244.2$  Hz), 115.0, 114.0, 55.5, 47.5 (t,  $J = 19.8$  Hz), 32.6, 30.1 (t,  $J = 4.0$  Hz).

**$^{19}\text{F}$  NMR (376 MHz,  $\text{CDCl}_3$ )**  $\delta$  -116.65 – -122.88 (m).

**HRMS (EI)**  $m/z$  calcd for  $\text{C}_{25}\text{H}_{24}\text{F}_2\text{O}[\text{M}^+]$ : 378.1795, found: 378.1788.

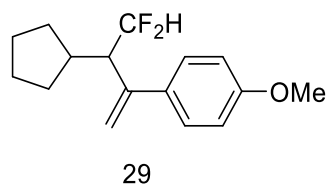

1-(3-cyclopentyl-4,4-difluorobut-1-en-2-yl)-4-methoxybenzene (**29**) (39.0 mg, 73%); colorless liquid.

**R<sub>f</sub>** = 0.5 (petroleum ether)

**<sup>1</sup>H NMR (400 MHz, CDCl<sub>3</sub>)** δ 7.32 – 7.27 (m, 2H), 6.89 – 6.82 (m, 2H), 5.89 (td, *J* = 56.5, 3.9 Hz, 1H), 5.41 (s, 1H), 5.18 (s, 1H), 3.81 (s, 3H), 2.99 – 2.56 (m, 1H), 2.23 – 2.07 (m, 1H), 2.01 – 1.90 (m, 1H), 1.87 – 1.78 (m, 1H), 1.75 – 1.64 (m, 1H), 1.62 – 1.57 (m, 1H), 1.53 – 1.41 (m, 1H), 1.34 – 1.21 (m, 2H), 1.16 – 1.02 (m, 1H).

**<sup>13</sup>C NMR (101 MHz, CDCl<sub>3</sub>)** δ 159.2, 145.6 (t, *J* = 3.9 Hz), 135.9, 127.8, 118.2 (t, *J* = 244.0 Hz), 115.2, 113.8, 55.4, 53.6 (t, *J* = 18.7 Hz), 41.4 (t, *J* = 3.6 Hz), 31.7, 31.5, 25.4, 24.1.

**<sup>19</sup>F NMR (376 MHz, CDCl<sub>3</sub>)** δ -117.96 – -120.20 (m).

**HRMS (EI)** *m/z* calcd for C<sub>16</sub>H<sub>20</sub>F<sub>2</sub>O[M<sup>+</sup>]: 266.1482, found: 266.1477.

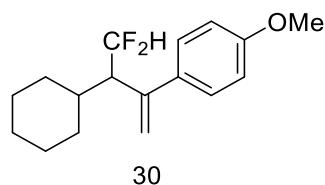

1-(3-cyclohexyl-4,4-difluorobut-1-en-2-yl)-4-methoxybenzene (**30**) (43.4 mg, 78%); colorless liquid.

**R<sub>f</sub>** = 0.4 (petroleum ether)

**<sup>1</sup>H NMR (400 MHz, CDCl<sub>3</sub>)** δ 7.29 (d, *J* = 8.8 Hz, 2H), 6.86 (d, *J* = 8.8 Hz, 2H), 6.00 (td, *J* = 56.4, 4.2 Hz, 1H), 5.42 (s, 1H), 5.15 (s, 1H), 3.81 (s, 3H), 2.85 – 2.69 (m, 1H), 1.94 – 1.62 (m, 5H), 1.34 – 0.92 (m, 6H).

**<sup>13</sup>C NMR (101 MHz, CDCl<sub>3</sub>)** δ 159.2, 144.7 (t, *J* = 4.0 Hz), 136.3, 127.7, 117.8 (t, *J* = 243.9 Hz), 114.8, 113.8, 55.4, 53.5 (t, *J* = 18.7 Hz), 39.4, 31.3, 31.1, 26.5, 26.4.

**<sup>19</sup>F NMR (376 MHz, CDCl<sub>3</sub>)** δ -118.19 – -121.91 (m).

**HRMS (EI)** *m/z* calcd for C<sub>17</sub>H<sub>22</sub>F<sub>2</sub>O[M<sup>+</sup>]: 280.1633, found: 280.1630.

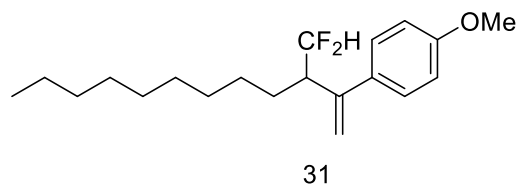

1-(3-(difluoromethyl)dodec-1-en-2-yl)-4-methoxybenzene (**31**) (44.1 mg, 68%); colorless liquid.

**R<sub>f</sub>**=0.7 (petroleum ether)

**<sup>1</sup>H NMR (400 MHz, CDCl<sub>3</sub>)** δ 7.30 – 7.26 (m, 2H), 6.92 – 6.81 (m, 2H), 5.74 (td, *J* = 56.8, 4.7 Hz, 1H), 5.41 (s, 1H), 5.15 (s, 1H), 3.82 (s, 3H), 3.06 – 2.86 (m, 1H), 1.84 – 1.70 (m, 1H), 1.65 – 1.54 (m, 1H), 1.44 – 1.37 (m, 1H), 1.31 – 1.18 (m, 13H), 0.87 (t, *J* = 6.8 Hz, 3H).

**<sup>13</sup>C NMR (101 MHz, CDCl<sub>3</sub>)** δ 159.3, 145.3 (t, *J* = 4.5 Hz), 135.0, 127.8, 118.3 (t, *J* = 244.5 Hz), 114.6, 113.9, 55.4, 48.4 (t, *J* = 20.2 Hz), 32.0, 29.8, 29.7, 29.5, 29.4, 28.7 (t, *J* = 4.0 Hz), 26.9, 22.8, 14.3.

**<sup>19</sup>F NMR (376 MHz, CDCl<sub>3</sub>)** δ -111.75 – -125.74 (m).

**HRMS (EI)** *m/z* calcd for C<sub>20</sub>H<sub>30</sub>F<sub>2</sub>O[M<sup>+</sup>]: 324.2265, found: 324.2259.

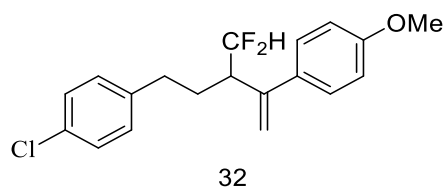

1-chloro-3-(3-(difluoromethyl)-4-(4-methoxyphenyl)pent-4-en-1-yl)benzene (32)  
(47.8 mg, 71%); yellow oil.

**R<sub>f</sub>**=0.6 (petroleum ether: ethyl acetate, 100:1, v/v)

**<sup>1</sup>H NMR (400 MHz, CDCl<sub>3</sub>)** δ 7.28 (s, 2H), 7.26 – 7.22 (m, 2H), 7.03 (d, *J* = 8.5 Hz, 2H), 6.89 (dd, *J* = 8.6, 1.7 Hz, 2H), 5.79 (td, *J* = 56.7, 4.4 Hz, 1H), 5.51 (s, 1H), 5.23 (s, 1H), 3.84 (s, 3H), 3.07 – 2.90 (m, 1H), 2.81 – 2.69 (m, 1H), 2.65 – 2.53 (m, 1H), 2.18 – 2.05 (m, 1H), 1.93 – 1.84 (m, 1H).

**<sup>13</sup>C NMR (101 MHz, CDCl<sub>3</sub>)** δ 159.4, 144.6 (t, *J* = 4.2 Hz), 139.8, 134.3, 131.8, 129.8, 128.5, 127.7, 117.9 (t, *J* = 244.9 Hz), 114.8, 113.9, 55.3, 47.3 (t, *J* = 19.9 Hz), 32.2, 29.9 (t, *J* = 4.0 Hz).

**<sup>19</sup>F NMR (376 MHz, CDCl<sub>3</sub>)** δ -108.63 – -157.97 (m).

**HRMS (EI)** *m/z* calcd for C<sub>19</sub>H<sub>19</sub>ClF<sub>2</sub>O[M<sup>+</sup>]: 336.1093, found: 336.1088.

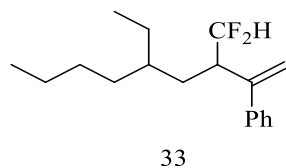

(3-(difluoromethyl)-4-ethyloct-1-en-2-yl)benzene (**33**) (48.2 mg, 87%); colorless liquid.

**R<sub>f</sub>**=0.7 (petroleum ether)

**<sup>1</sup>H NMR (400 MHz, CDCl<sub>3</sub>)** δ 7.39 – 7.22 (m, 5H), 5.76 (td, *J* = 56.9, 2.3 Hz, 1H), 5.50 (s, 1H), 5.26 (s, 1H), 3.20 – 2.94 (m, 1H), 1.63 (t, *J* = 7.1 Hz, 2H), 1.45 – 1.29 (m, 3H), 1.29 – 1.10 (m, 6H), 0.89 (t, *J* = 6.7 Hz, 2H), 0.88 – 0.78 (m, 3H), 0.78 (d, *J* = 7.4 Hz, 1H).

**<sup>13</sup>C NMR (101 MHz, CDCl<sub>3</sub>)** δ 146.1 (dt, *J* = 5.9, 4.3 Hz), 142.6 (d, *J* = 3.0 Hz), 128.5, 127.7, 126.7, 117.3 (t, *J* = 244.4 Hz), 116.4, 46.1 (t, *J* = 19.5 Hz), 35.6 (d, *J* = 38.2 Hz), 32.8 (d, *J* = 113.9 Hz), 32.5 (dt, *J* = 25.1, 3.7 Hz), 28.6 (d, *J* = 48.4 Hz), 26.6, 25.1, 23.1, 14.2 (d, *J* = 5.9 Hz), 10.9, 10.1.

**<sup>19</sup>F NMR (376 MHz, CDCl<sub>3</sub>)** δ -118.09 – -123.18 (m).

**HRMS (EI)** *m/z* calcd for C<sub>18</sub>H<sub>26</sub>F<sub>2</sub>[M<sup>+</sup>]: 280.1997, found:280.1994.

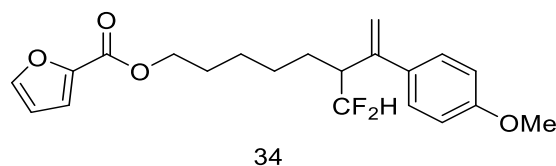

6-(difluoromethyl)-7-(4-methoxyphenyl)oct-7-en-1-yl furan-2-carboxylate (**34**) (53.4 mg, 71%); yellow solid.

**R<sub>f</sub>**=0.4 (petroleum ether: ethyl acetate, 100:1, v/v)

**<sup>1</sup>H NMR (400 MHz, CDCl<sub>3</sub>)** δ 7.57 (d, *J* = 1.6 Hz, 1H), 7.31 – 7.24 (m, 2H), 7.14 (d, *J* = 3.4 Hz, 1H), 6.89 – 6.84 (m, 2H), 6.50 (dd, *J* = 3.5, 1.7 Hz, 1H), 5.75 (td, *J* = 56.7, 4.6 Hz, 1H), 5.42 (s, 1H), 5.15 (s, 1H), 4.26 (t, *J* = 6.7 Hz, 2H), 3.81 (s, 3H), 3.12 – 2.87 (m, 1H), 1.90 – 1.57 (m, 4H), 1.51 – 1.32 (m, 4H).

**<sup>13</sup>C NMR (101 MHz, CDCl<sub>3</sub>)** δ 159.4, 159.0, 146.4, 145.1 (t, *J* = 4.4 Hz), 144.9, 134.8, 127.7, 118.2 (t, *J* = 245.4 Hz), 117.9, 114.7, 113.9, 111.9, 65.0, 55.4, 48.3 (t, *J* = 19.6 Hz), 28.6, 28.5 (t, *J* = 4.0 Hz), 26.6, 26.1.

**<sup>19</sup>F NMR (376 MHz, CDCl<sub>3</sub>)** δ -114.90 – -124.28 (m).

**HRMS (EI)** *m/z* calcd for C<sub>21</sub>H<sub>24</sub>F<sub>2</sub>O<sub>4</sub>[M<sup>+</sup>]: 378.1643, found: 378.1639.



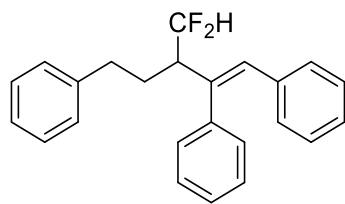

35

(Z)-3-(difluoromethyl)pent-1-ene-1,2,5-triyltribenzene (**35**) (60.1 mg, 87%); white solid.

$R_f$ =0.6 (petroleum ether: ethyl acetate, 100:1, v/v)

$^1\text{H}$  NMR (400 MHz,  $\text{CDCl}_3$ )  $\delta$  7.43 – 7.32 (m, 5H), 7.29 (d,  $J$  = 6.3 Hz, 1H), 7.25 – 7.21 (m, 4H), 7.15 (dt,  $J$  = 6.1, 2.6 Hz, 3H), 6.97 (dd,  $J$  = 6.7, 2.9 Hz, 2H), 6.64 (s, 1H), 5.79 (td,  $J$  = 56.5, 5.4 Hz, 1H), 3.03 – 2.87 (m, 2H), 2.83 – 2.71 (m, 1H), 2.16 – 2.08 (m, 1H), 2.05 – 1.95 (m, 1H).

$^{13}\text{C}$  NMR (101 MHz,  $\text{CDCl}_3$ )  $\delta$  141.4, 139.6, 137.8 (dd,  $J$  = 5.4, 3.5 Hz), 136.4, 131.7, 129.3, 129.0, 129.0, 128.5, 128.5, 128.0, 127.6, 127.0, 126.2, 117.6 (t,  $J$  = 243.8 Hz), 52.6 (t,  $J$  = 20.0 Hz), 33.1, 28.7 (t,  $J$  = 3.8 Hz).

$^{19}\text{F}$  NMR (376 MHz,  $\text{CDCl}_3$ )  $\delta$  -112.25 – -136.46 (m).

HRMS (EI)  $m/z$  calcd for  $\text{C}_{24}\text{H}_{22}\text{F}_2[\text{M}^+]$ : 348.1684, found: 348.1680.

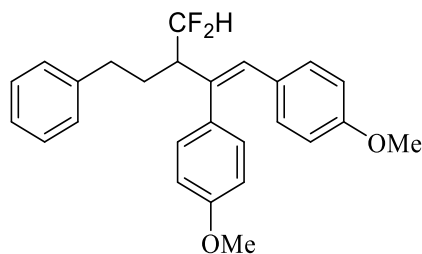

36

(Z)-4,4'-(3-(difluoromethyl)-5-phenylpent-1-ene-1,2-diyl)bis(methoxybenzene) (**36**) (52.1 mg, 64%); white solid.

$R_f$ =0.6 (petroleum ether: ethyl acetate, 100:1, v/v)

$^1\text{H}$  NMR (400 MHz,  $\text{CDCl}_3$ )  $\delta$  7.29 (t,  $J$  = 7.2 Hz, 2H), 7.18 (t,  $J$  = 7.4 Hz, 3H), 7.08 (d,  $J$  = 8.3 Hz, 2H), 6.91 – 6.81 (m, 4H), 6.66 (d,  $J$  = 8.3 Hz, 2H), 6.47 (s, 1H), 5.69 (td,  $J$  = 56.5, 5.4 Hz, 1H), 3.83 (s, 3H), 3.74 (s, 3H), 2.95 – 2.78 (m, 2H), 2.73 – 2.62 (m, 1H), 2.08 – 1.98 (m, 1H), 1.93 – 1.86 (m, 1H).

**<sup>13</sup>C NMR (101 MHz, CDCl<sub>3</sub>)** δ 159.0, 158.5, 141.6, 132.0, 131.2, 130.6, 130.4, 129.3, 128.6, 128.6, 126.2, 117.9 (t, *J* = 244.4 Hz), 114.5, 113.5, 55.4, 55.3, 52.9 (t, *J* = 19.8 Hz), 33.2, 29.9, 28.7 (t, *J* = 4.0 Hz).

**<sup>19</sup>F NMR (376 MHz, CDCl<sub>3</sub>)** δ -110.54 – -139.01 (m).

**HRMS (EI)** *m/z* calcd for C<sub>26</sub>H<sub>26</sub>F<sub>2</sub>O<sub>2</sub>[M<sup>+</sup>]: 408.1901, found: 408.1895.

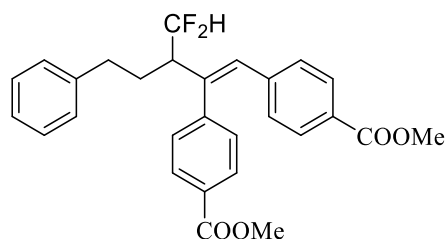

37

Dimethyl 4,4'-(3-(difluoromethyl)-5-phenylpent-1-ene-1,2-diyl)(Z)-dibenzoate (**37**) (67.1 mg, 73%); yellow solid.

**R<sub>f</sub>** = 0.6 (petroleum ether: ethyl acetate, 100:1, v/v)

**<sup>1</sup>H NMR (400 MHz, CDCl<sub>3</sub>)** δ 8.03 (dd, *J* = 8.3, 1.4 Hz, 2H), 7.82 (dd, *J* = 8.4, 1.4 Hz, 2H), 7.34 (t, *J* = 7.9 Hz, 2H), 7.31 (d, *J* = 1.2 Hz, 1H), 7.28 (s, 1H), 7.26 (d, *J* = 14.2 Hz, 1H), 7.20 (d, *J* = 8.2 Hz, 2H), 7.00 (d, *J* = 7.0 Hz, 2H), 6.74 (s, 1H). 5.68 (td, *J* = 56.3, 5.0 Hz, 1H), 3.86 (d, *J* = 1.3 Hz, 3H), 3.79 (d, *J* = 1.3 Hz, 3H), 2.92 – 2.75 (m, 2H), 2.70 – 2.58 (m, 1H), 2.11 – 1.96 (m, 1H), 1.97 – 1.83 (m, 1H).

**<sup>13</sup>C NMR (101 MHz, CDCl<sub>3</sub>)** δ 166.8, 166.8, 144.5, 140.9, 140.7, 139.6 (t, *J* = 3.0 Hz), 131.5, 130.3, 129.7, 129.5, 129.3, 129.2, 128.7, 128.5, 126.4, 117.4 (t, *J* = 245.4 Hz), 52.4, 52.2, 52.1, 51.9, 33.1, 29.1 (t, *J* = 4.0 Hz).

**<sup>19</sup>F NMR (376 MHz, CDCl<sub>3</sub>)** δ -103.73 – -131.70 (m).

**HRMS (EI)** *m/z* calcd for C<sub>28</sub>H<sub>26</sub>F<sub>2</sub>O<sub>4</sub>[M<sup>+</sup>]: 464.1794, found: 464.1792.

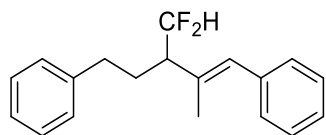

38

(E)-3-(difluoromethyl)-2-methylpent-1-ene-1,5-diyl dibenzene (**38**) (40.6 mg, 71%,

dr = 14:1); yellow solid.

**R<sub>f</sub>**=0.6 (petroleum ether: ethyl acetate, 100:1, v/v)

**<sup>1</sup>H NMR (400 MHz, CDCl<sub>3</sub>)** δ 7.36 (t, *J* = 7.6 Hz, 2H), 7.29 (t, *J* = 7.7 Hz, 3H), 7.20 (d, *J* = 7.3 Hz, 1H), 7.16 (d, *J* = 6.8 Hz, 2H), 7.13 (d, *J* = 6.8 Hz, 2H), 5.8 – 5.7 (m, 1H), 5.64 (td, *J* = 56.7, 5.4 Hz, 1H), 2.88 – 2.81 (m, 1H), 2.78 – 2.70 (m, 1H), 2.66 – 2.58 (m, 1H), 2.00 – 1.94 (m, 1H), 1.86 – 1.75 (m, 1H), 1.58 (d, *J* = 6.8 Hz, 3H).

**<sup>13</sup>C NMR (101 MHz, CDCl<sub>3</sub>)** δ 141.7, 139.5, 137.2 (dd, *J* = 5.4, 3.6 Hz), 129.1, 128.6, 128.5, 128.5, 127.4, 127.1, 126.1, 117.9 (t, *J* = 243.4 Hz), 51.5 (t, *J* = 19.8 Hz), 33.2, 28.8 (t, *J* = 4.0 Hz), 15.0.

**<sup>19</sup>F NMR (376 MHz, CDCl<sub>3</sub>)** δ -114.66 – -124.87 (m).

**HRMS (EI)** *m/z* calcd for C<sub>19</sub>H<sub>20</sub>F<sub>2</sub>[M<sup>+</sup>]: 286.1533, found: 286.1530.

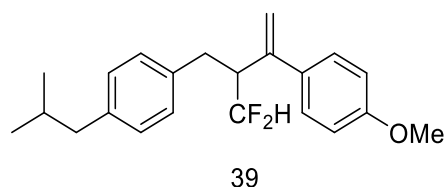

1-(4,4-difluoro-3-(4-isobutylbenzyl)but-1-en-2-yl)-4-methoxybenzene (**39**) (53.3 mg, 78%); white solid.

**R<sub>f</sub>**=0.5 (petroleum ether: ethyl acetate, 100:1, v/v)

**<sup>1</sup>H NMR (400 MHz, CDCl<sub>3</sub>)** δ 7.11 – 7.06 (m, 3H), 7.06 – 7.00 (m, 3H), 6.82 – 6.73 (m, 2H), 5.81 (td, *J* = 56.5, 4.1 Hz, 1H), 5.44 (s, 1H), 5.25 (s, 1H), 3.78 (s, 3H), 3.3 – 3.2 (m, 1H), 3.11 (dd, *J* = 13.8, 5.3 Hz, 1H), 2.89 (dd, *J* = 13.8, 9.4 Hz, 1H), 2.43 (d, *J* = 7.2 Hz, 2H), 1.82 (dt, *J* = 13.5, 6.8 Hz, 1H), 0.88 (d, *J* = 6.6 Hz, 6H).

**<sup>13</sup>C NMR (101 MHz, CDCl<sub>3</sub>)** δ 159.2, 144.6 (t, *J* = 3.8 Hz), 139.9, 135.8, 135.1, 129.3, 129.1, 127.7, 117.6 (t, *J* = 244.2 Hz), 115.6, 113.7, 55.4, 50.2 (t, *J* = 19.5 Hz), 45.1, 34.7 (t, *J* = 4.6 Hz), 30.4, 22.5, 22.5.

**<sup>19</sup>F NMR (376 MHz, CDCl<sub>3</sub>)** δ -119.14 – -123.82 (m).

**HRMS (EI)** *m/z* calcd for C<sub>22</sub>H<sub>26</sub>F<sub>2</sub>O[M<sup>+</sup>]: 344.1952, found: 344.1944.

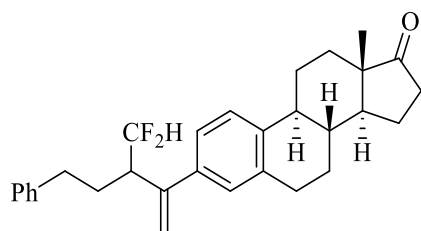

40

(8R,9S,13S,14S)-3-(3-(difluoromethyl)-5-phenylpent-1-en-2-yl)-13-methyl-6,7,8,9,11,12,13,14,15,16-decahydro-17H-cyclopenta[a]phenanthren-17-one (40) (47.6 mg, 53%); white solid.

$R_f$ =0.5 (petroleum ether: ethyl acetate, 50:1, v/v)

$^1\text{H NMR}$  (400 MHz,  $\text{CDCl}_3$ )  $\delta$  7.28 (dd,  $J$  = 9.0, 1.8 Hz, 2H), 7.25 (s, 1H), 7.20 (t,  $J$  = 7.6 Hz, 1H), 7.15 – 7.10 (m, 3H), 7.02 (dd,  $J$  = 5.2, 2.0 Hz, 1H), 5.76 (tdd,  $J$  = 56.6, 4.5, 2.3 Hz, 1H), 5.55 (s, 1H), 5.27 (s, 1H), 3.09 – 2.98 (m, 1H), 2.92 – 2.85 (m, 2H), 2.77 (dt,  $J$  = 10.6, 3.7 Hz, 1H), 2.67 – 2.59 (m, 1H), 2.54 – 2.45 (m, 1H), 2.46 – 2.41 (m, 1H), 2.31 (td,  $J$  = 11.1, 4.1 Hz, 1H), 2.20 – 2.10 (m, 2H), 2.10 – 2.02 (m, 2H), 1.99 – 1.91 (m, 2H), 1.68 – 1.59 (m, 2H), 1.56 – 1.40 (m, 5H), 1.34 – 1.22 (m, 2H).

$^{13}\text{C NMR}$  (101 MHz,  $\text{CDCl}_3$ )  $\delta$  145.1 (t,  $J$  = 3.7 Hz), 141.6, 139.6, 136.7, 128.6, 128.6, 127.2, 127.2, 126.2, 125.6, 124.1, 124.1, 118.0 (t,  $J$  = 244.3 Hz), 115.7, 50.6, 48.1, 47.4 (t,  $J$  = 19.7 Hz), 44.5, 38.3, 36.0, 33.0, 31.7, 30.0 (t,  $J$  = 4.5 Hz), 29.6, 26.6, 25.8, 21.7, 14.0.

$^{19}\text{F NMR}$  (376 MHz,  $\text{CDCl}_3$ )  $\delta$  -117.07 – -122.98 (m).

**HRMS (EI)**  $m/z$  calcd for  $\text{C}_{30}\text{H}_{34}\text{F}_2\text{O}[\text{M}^+]$ : 448.2572, found:448.2568.

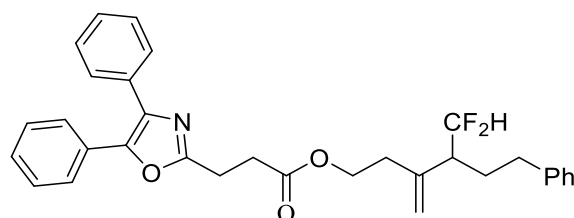

41

4-(difluoromethyl)-3-methylene-6-phenylhexyl 3-(4,5-diphenyloxazol-2-yl)propanoate (41) (83.4 mg, 81%); white solid.

$R_f$ =0.4 (petroleum ether: ethyl acetate, 5:1, v/v)

**<sup>1</sup>H NMR (400 MHz, CDCl<sub>3</sub>)** δ 7.59 – 7.52 (m, 2H), 7.53 – 7.46 (m, 2H), 7.33 – 7.23 (m, 4H), 7.27 – 7.16 (m, 4H), 7.12 (d, *J* = 7.1 Hz, 1H), 7.08 (d, *J* = 6.9 Hz, 2H), 5.60 (td, *J* = 56.6, 4.4 Hz, 1H), 5.05 (s, 1H), 4.99 (s, 1H), 4.21 (t, *J* = 6.9 Hz, 2H), 3.11 (t, *J* = 7.5 Hz, 2H), 2.84 (t, *J* = 7.5 Hz, 2H), 2.67 – 2.54 (m, 1H), 2.52 – 2.36 (m, 3H), 2.35 – 2.23 (m, 1H), 1.98 – 1.67 (m, 2H).

**<sup>13</sup>C NMR (101 MHz, CDCl<sub>3</sub>)** δ 172.0, 161.8, 145.6, 141.3, 141.0 (t, *J* = 3.8 Hz), 135.3, 132.6, 129.1, 128.8, 128.7, 128.6, 128.6, 128.5, 128.2, 128.0, 126.6, 126.2, 118.0 (t, *J* = 244.6 Hz), 116.1, 62.8, 49.4 (t, *J* = 19.3 Hz), 34.0, 32.9, 31.2, 28.8 (t, *J* = 4.0 Hz), 23.6.

**<sup>19</sup>F NMR (376 MHz, CDCl<sub>3</sub>)** δ -117.71 – -121.49 (m).

**HRMS (ESI)** *m/z* calcd for C<sub>32</sub>H<sub>32</sub>F<sub>2</sub>NO<sub>3</sub>[(M+H)<sup>+</sup>]: 516.2345, found: 516.2344.

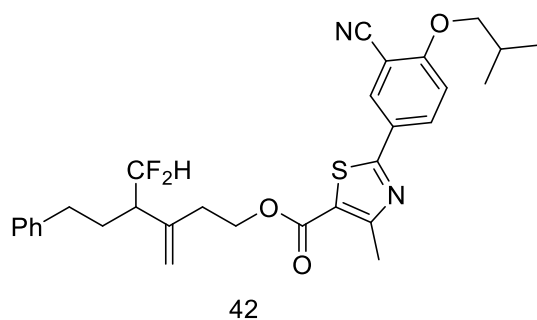

4-(difluoromethyl)-3-methylene-6-phenylhexyl 2-(3-cyano-4-isobutoxyphenyl)-4-methylthiazole-5-carboxylate (**42**) (76.4 mg, 71%); yellow solid.

**R<sub>f</sub>** = 0.3 (petroleum ether: ethyl acetate, 7:1, v/v)

**<sup>1</sup>H NMR (400 MHz, CDCl<sub>3</sub>)** δ 8.14 (d, *J* = 2.3 Hz, 1H), 8.05 (dd, *J* = 8.8, 2.3 Hz, 1H), 7.32 – 7.26 (m, 2H), 7.24 – 7.14 (m, 3H), 6.99 (d, *J* = 8.9 Hz, 1H), 5.74 (td, *J* = 56.5, 4.5 Hz, 1H), 5.23 (s, 1H), 5.15 (s, 1H), 4.45 (td, *J* = 6.7, 3.5 Hz, 2H), 3.89 (d, *J* = 6.5 Hz, 2H), 2.76 (s, 3H), 2.78 – 2.70 (m, 1H), 2.61 – 2.43 (m, 4H), 2.25 – 2.14 (m, 1H), 2.10 – 1.98 (m, 1H), 1.93 – 1.81 (m, 1H), 1.09 (d, *J* = 6.7 Hz, 6H).

**<sup>13</sup>C NMR (101 MHz, CDCl<sub>3</sub>)** δ 167.5, 162.6, 162.0, 161.6, 141.3, 140.8 (t, *J* = 3.8 Hz), 132.7, 132.2, 128.6, 128.5, 126.3, 126.0, 121.6, 118.0 (t, *J* = 244.5 Hz), 116.4, 115.5, 112.7, 103.1, 75.8, 63.1, 49.3 (t, *J* = 19.4 Hz), 34.3, 33.0, 28.9 (t, *J* = 4.0 Hz), 28.3, 19.2, 17.6.

**$^{19}\text{F}$  NMR (376 MHz,  $\text{CDCl}_3$ )  $\delta$  -117.68 – -121.61 (m).**

**HRMS (ESI)  $m/z$  calcd for  $\text{C}_{30}\text{H}_{33}\text{F}_2\text{N}_2\text{O}_3\text{S}[(\text{M}+\text{H})^+]$ : 539.2175, found: 539.2173.**

## 8. References

- [1] Liu, B.; Dong, J.; Wang, H.; Chen, J.; Liu, S.; Xiong, X.; Yuan, Y.; Zeng, X., Nickel-catalyzed reductive cross-coupling of difluoromethylated secondary alkyl bromides with organohalides. *Chem Commun* **2025**, 61, 2357-2360.
- [2] Li, P.-P.; Yang, Z.; Cai, S.-Q.; Liang, W.; Fang, S.-C.; Zhao, J.-F.; Pan, B.; Du, F., Palladium-Catalyzed and Photoinduced Site-Selective Alkynylation and Oxidation of the Remote C(sp<sup>3</sup>)–H. *Org Lett* **2025**, 27, 2602-2608.
- [3] Bera, S.; Fan, C.; Hu, X., Enantio- and diastereoselective construction of vicinal C(sp<sup>3</sup>) centres via nickel-catalysed hydroalkylation of alkenes. *Nature Catalysis* **2022**, 5, 1180-1187.
- [4] Zhao, X.; Zhu, S.; Qing, F.-L.; Chu, L., Reductive hydrobenzylation of terminal alkynes via photoredox and nickel dual catalysis. *Chem Commun* **2021**, 57, 9414-9417.
- [5] (a) Zhang, Y.-Q.; Hu, L.; Yuwen, L.; Lu, G.; Zhang, Q.-W., Nickel-catalysed enantioselective hydrosulfenation of alkynes. *Nature Catalysis* **2023**, 6, 487-494; (b) Zhang, Q.-Q.; Jin, R.-X.; Gao, Q.; Liu, P.; Zuo, Y.-W.; Lan, Q.; Wang, X.-S., Regioselective Nickel-Catalyzed Hydrotrifluoroalkylation of Alkynes to Construct Trisubstituted Allylic Trifluoromethyl Alkenes. *Org Lett* **2025**, 27, 3765-3770; (c) Zhang, T.; Zuo, Y.-W.; Jin, R.-X.; Zhang, Y.-F.; Wu, B.-B.; Wang, X.-S., Nickel-Catalyzed Hydrotrifluoroalkylation of Alkynes to Construct Allylic Trifluoromethyl Terminal Alkenes. *Org Lett* **2023**, 25, 3578-3584.

## 9. NMR Spectra

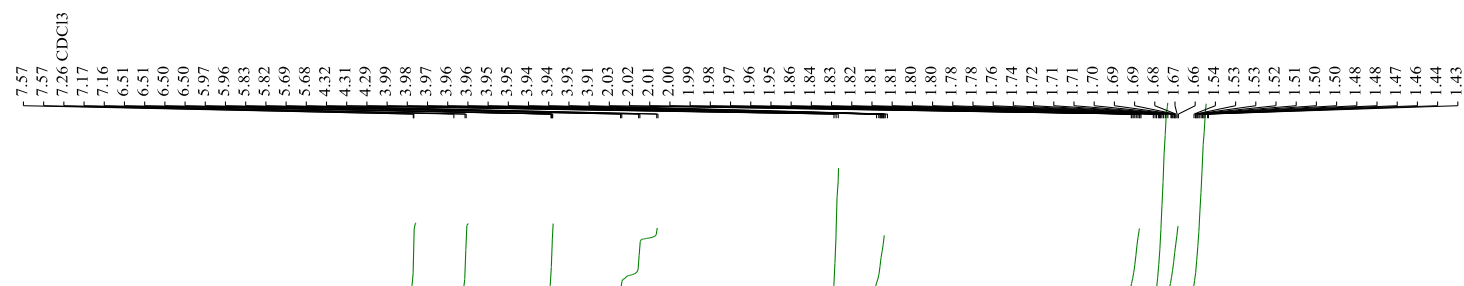

$^1\text{H}$  NMR of **34S** (400 MHz,  $\text{CDCl}_3$ )

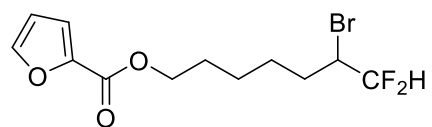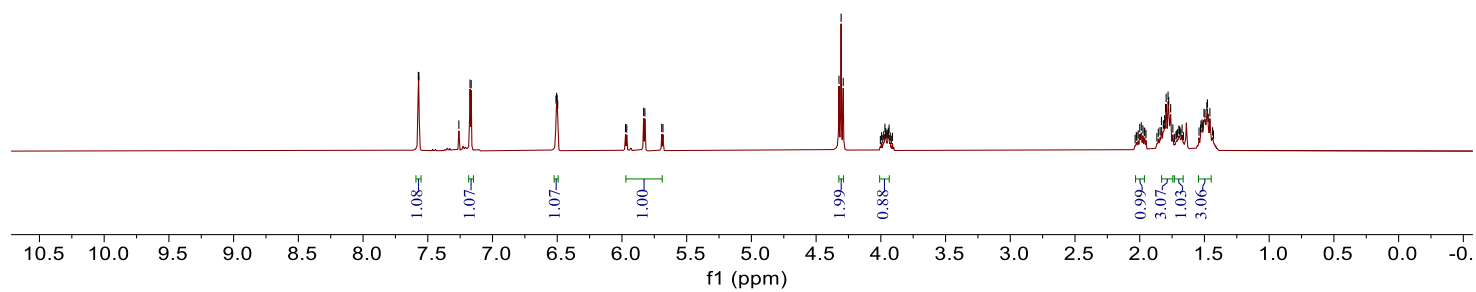



— 158.91  
 ~ 146.40  
 ~ 144.85  
 / 117.97  
 — 117.32  
 — 114.88  
 / 112.44  
 / 111.95  
 — 77.16 CDCl<sub>3</sub>  
 — 64.79  
 { 50.86  
 { 50.62  
 { 50.38  
 { 30.87  
 { 30.84  
 { 30.82  
 { 28.54  
 { 26.64  
 { 25.38

<sup>13</sup>C NMR of **34S** (101 MHz, CDCl<sub>3</sub>)

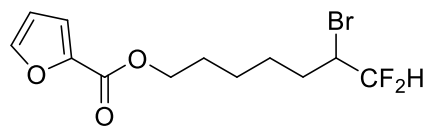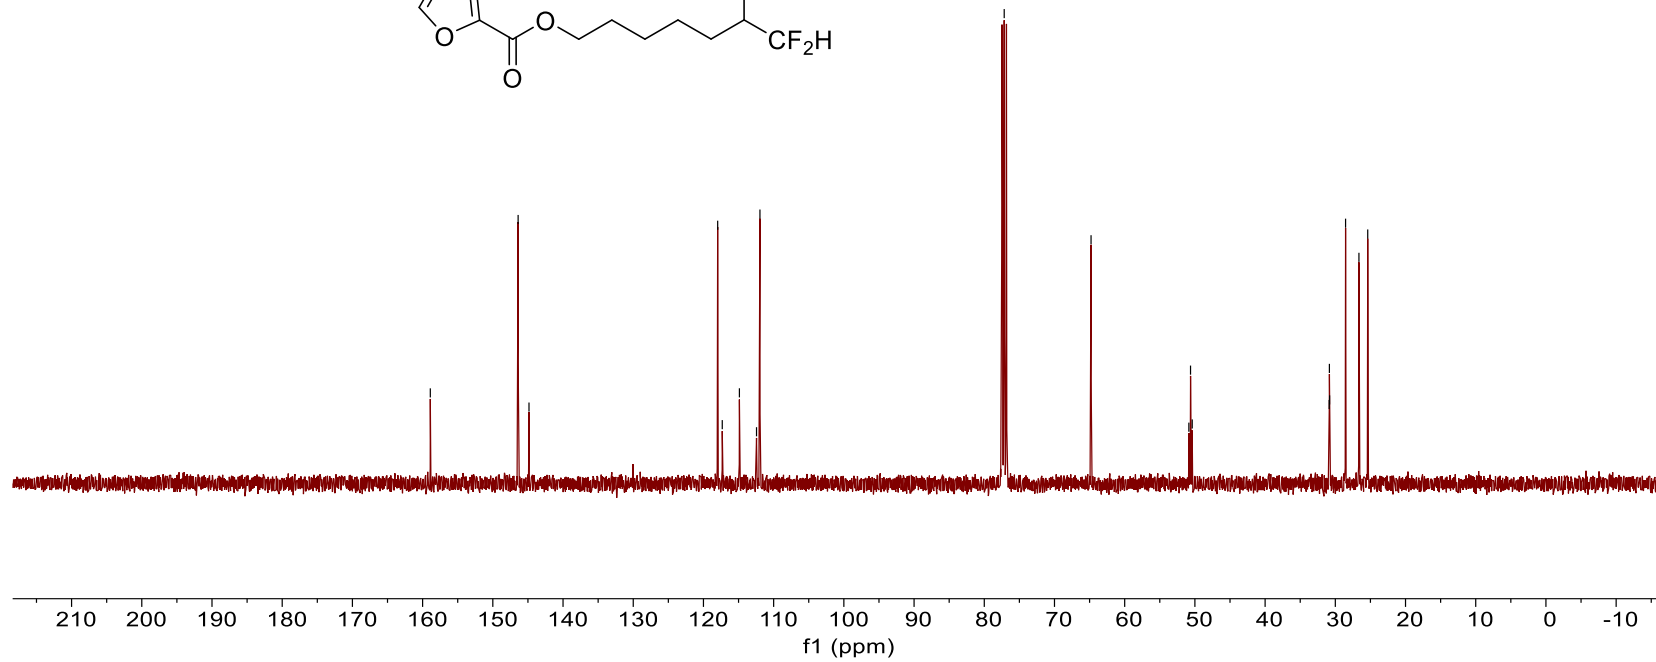

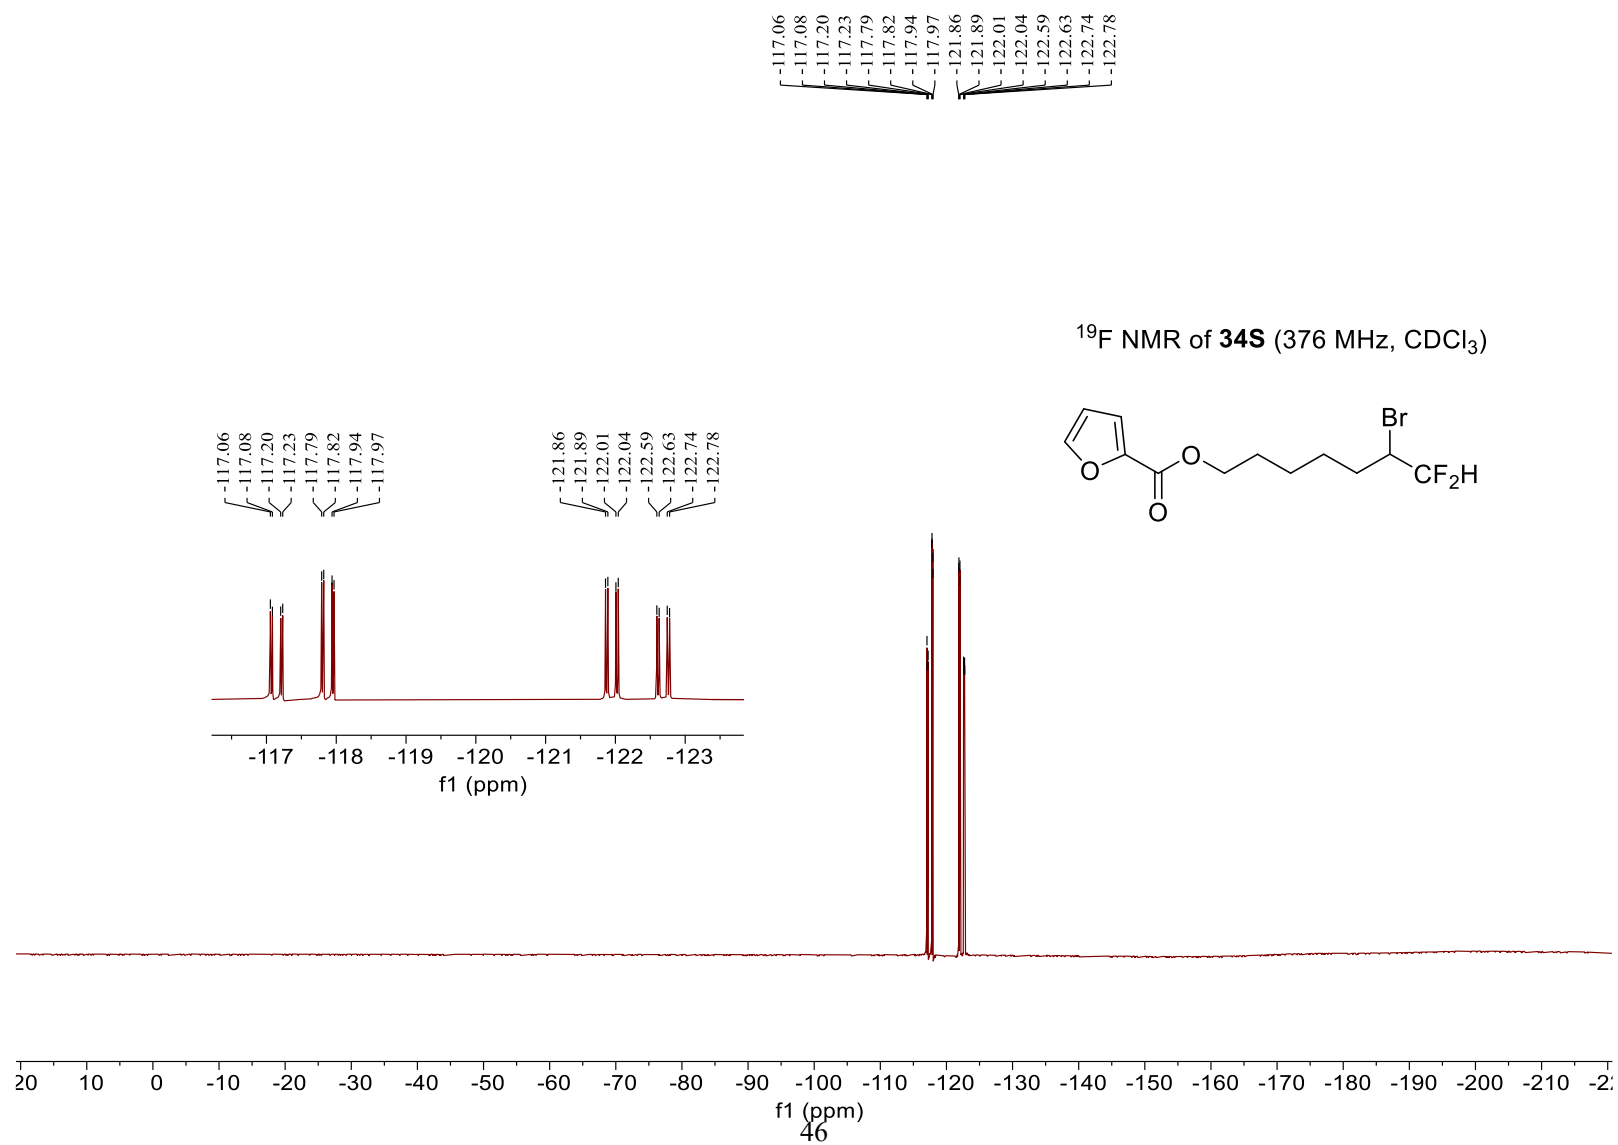

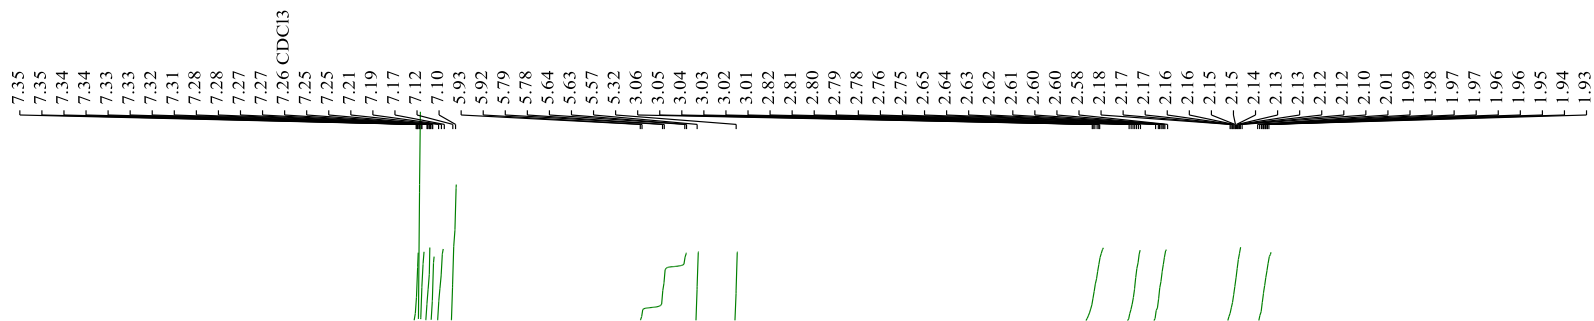

<sup>1</sup>H NMR of **3** (400 MHz, CDCl<sub>3</sub>)

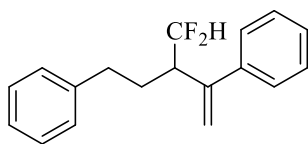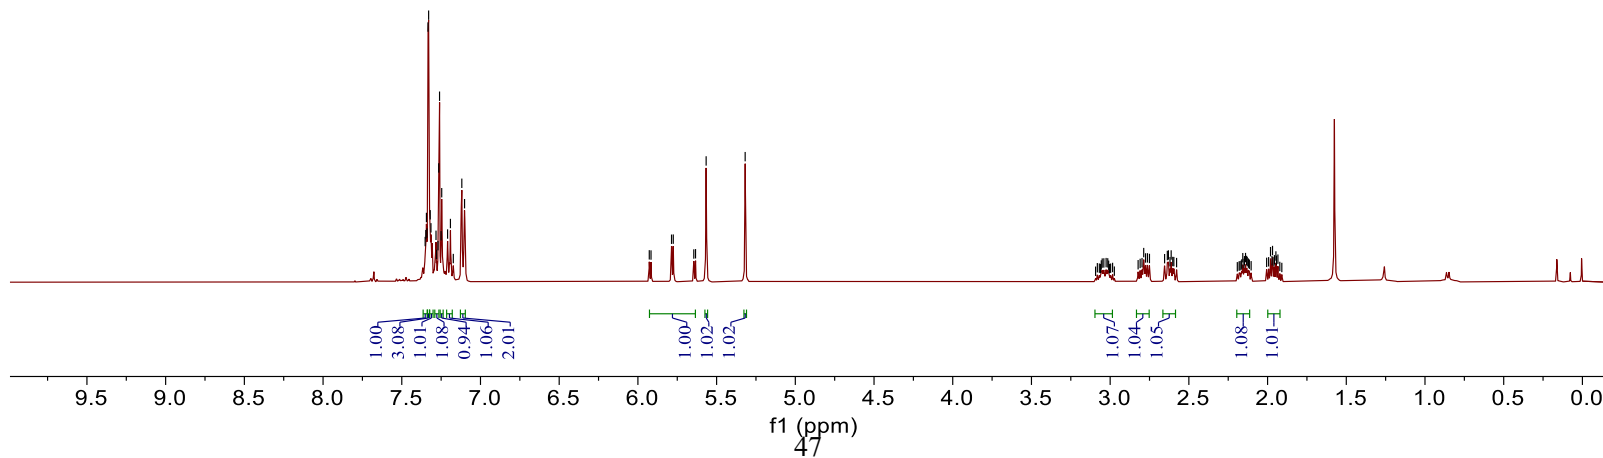

<sup>13</sup>C NMR of **3** (101 MHz, CDCl<sub>3</sub>)

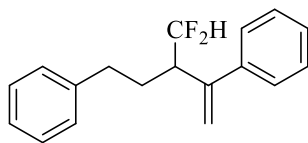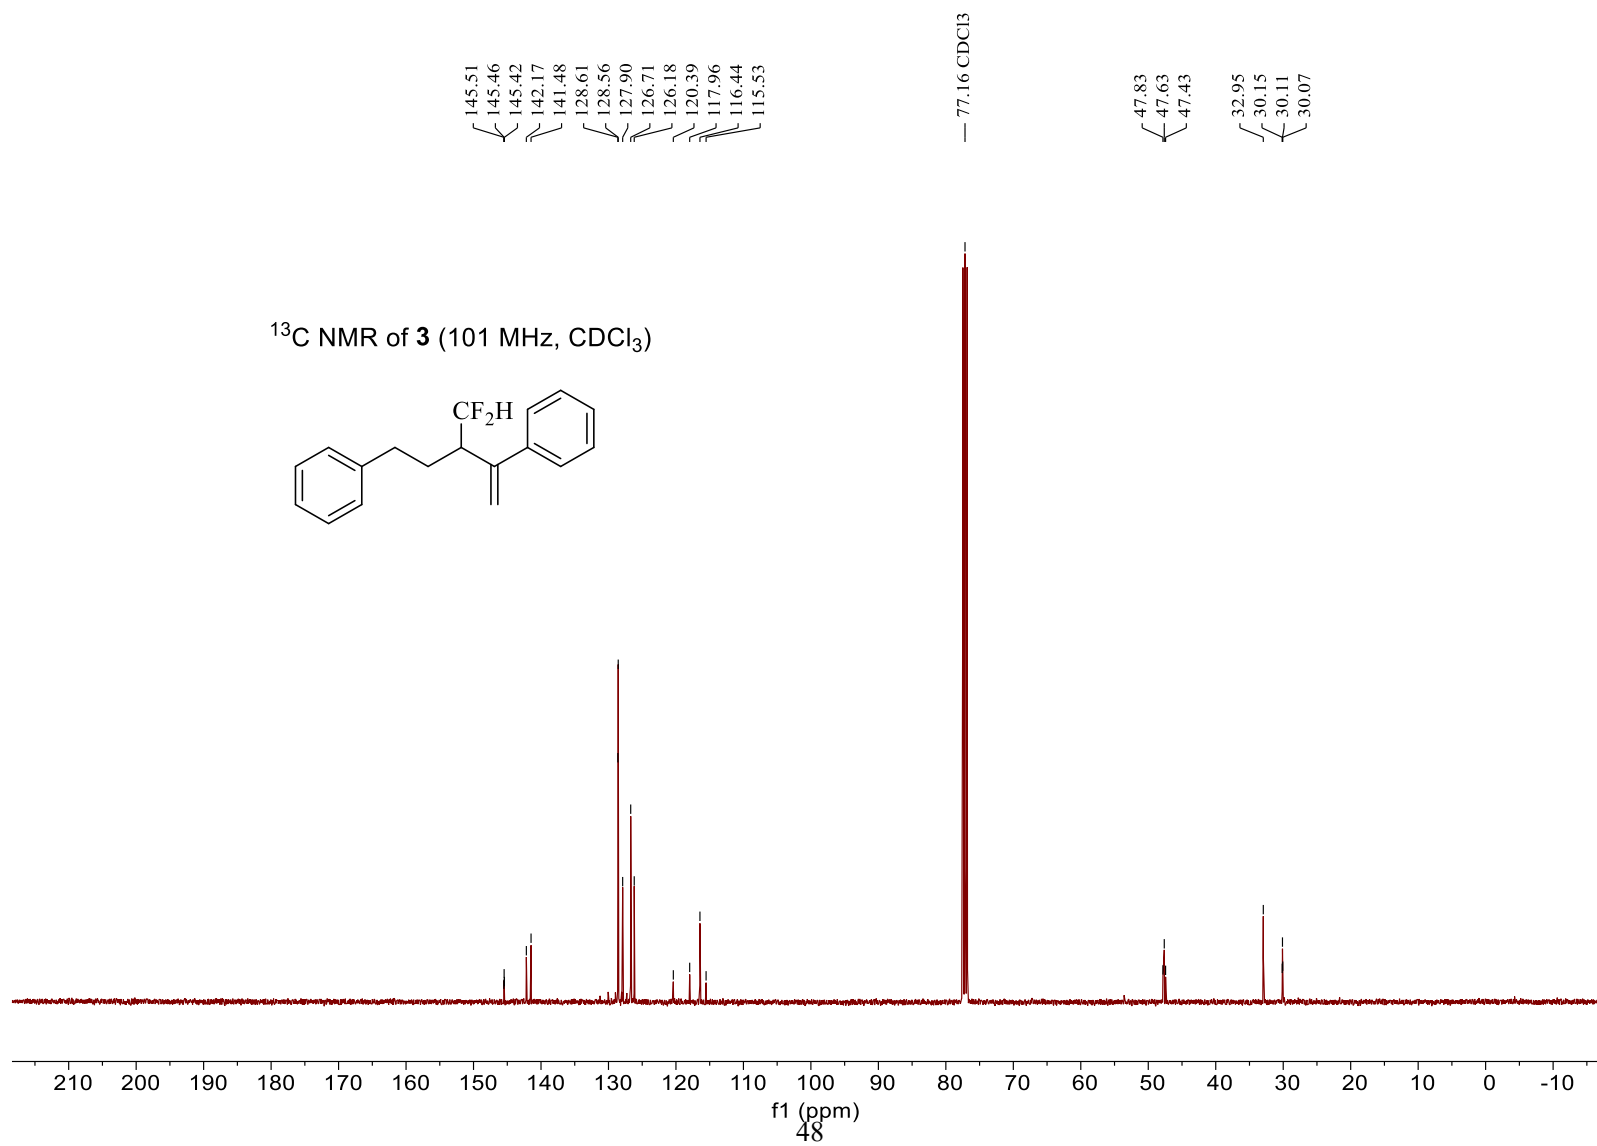

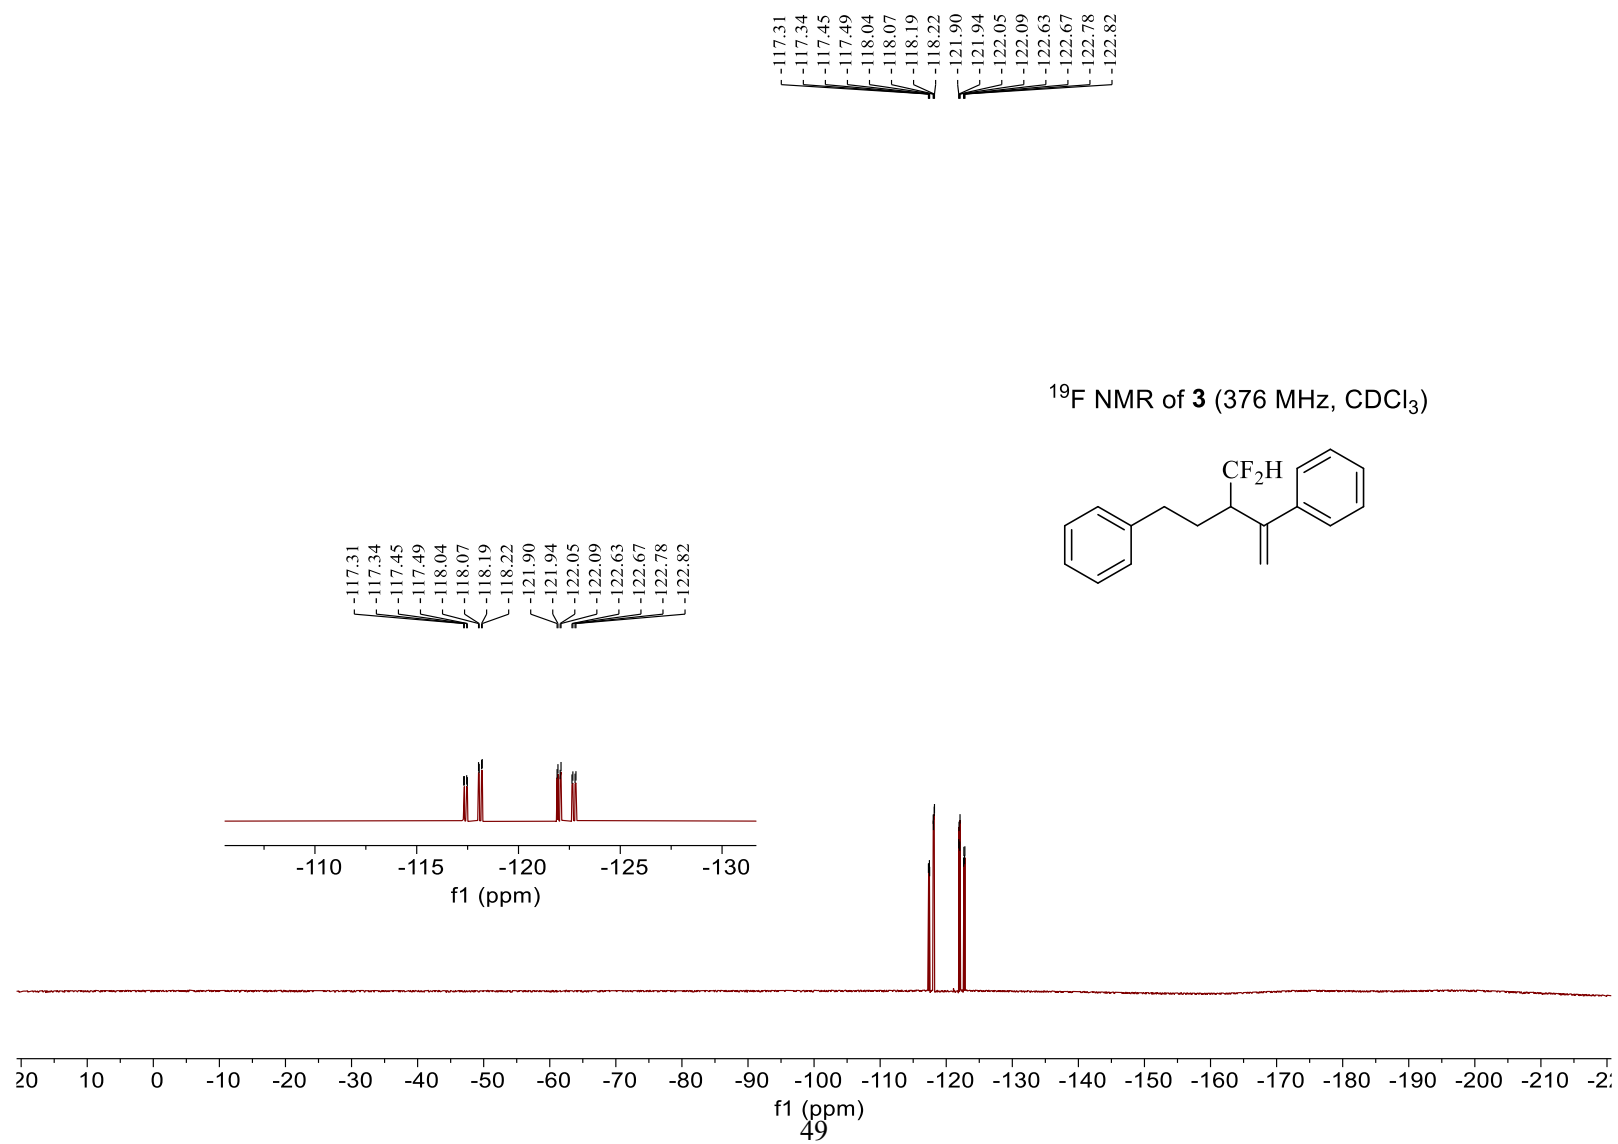

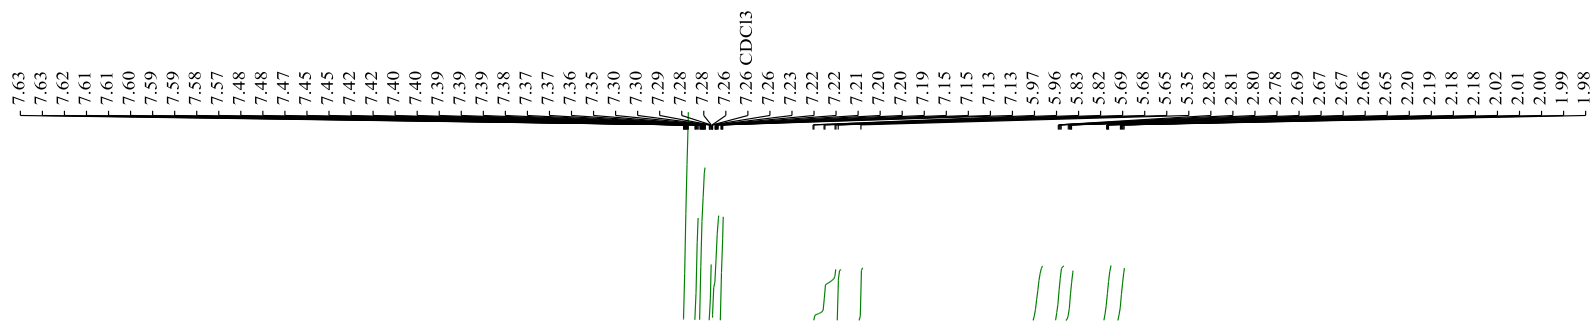

<sup>1</sup>H NMR of **4** (400 MHz, CDCl<sub>3</sub>)

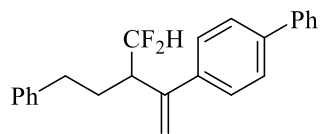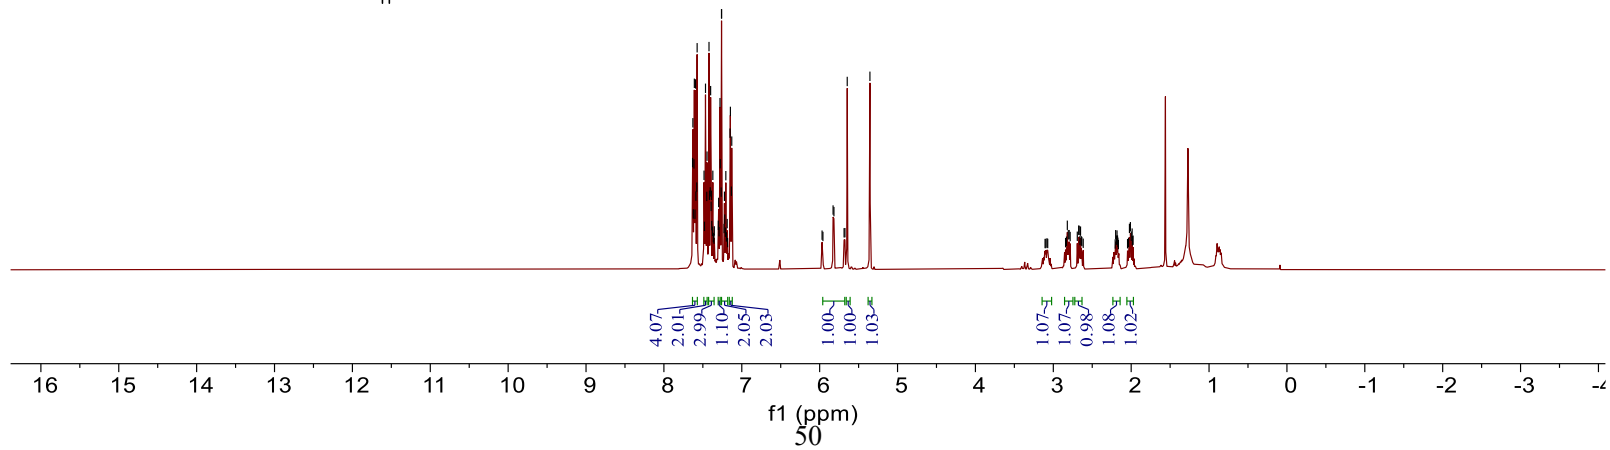

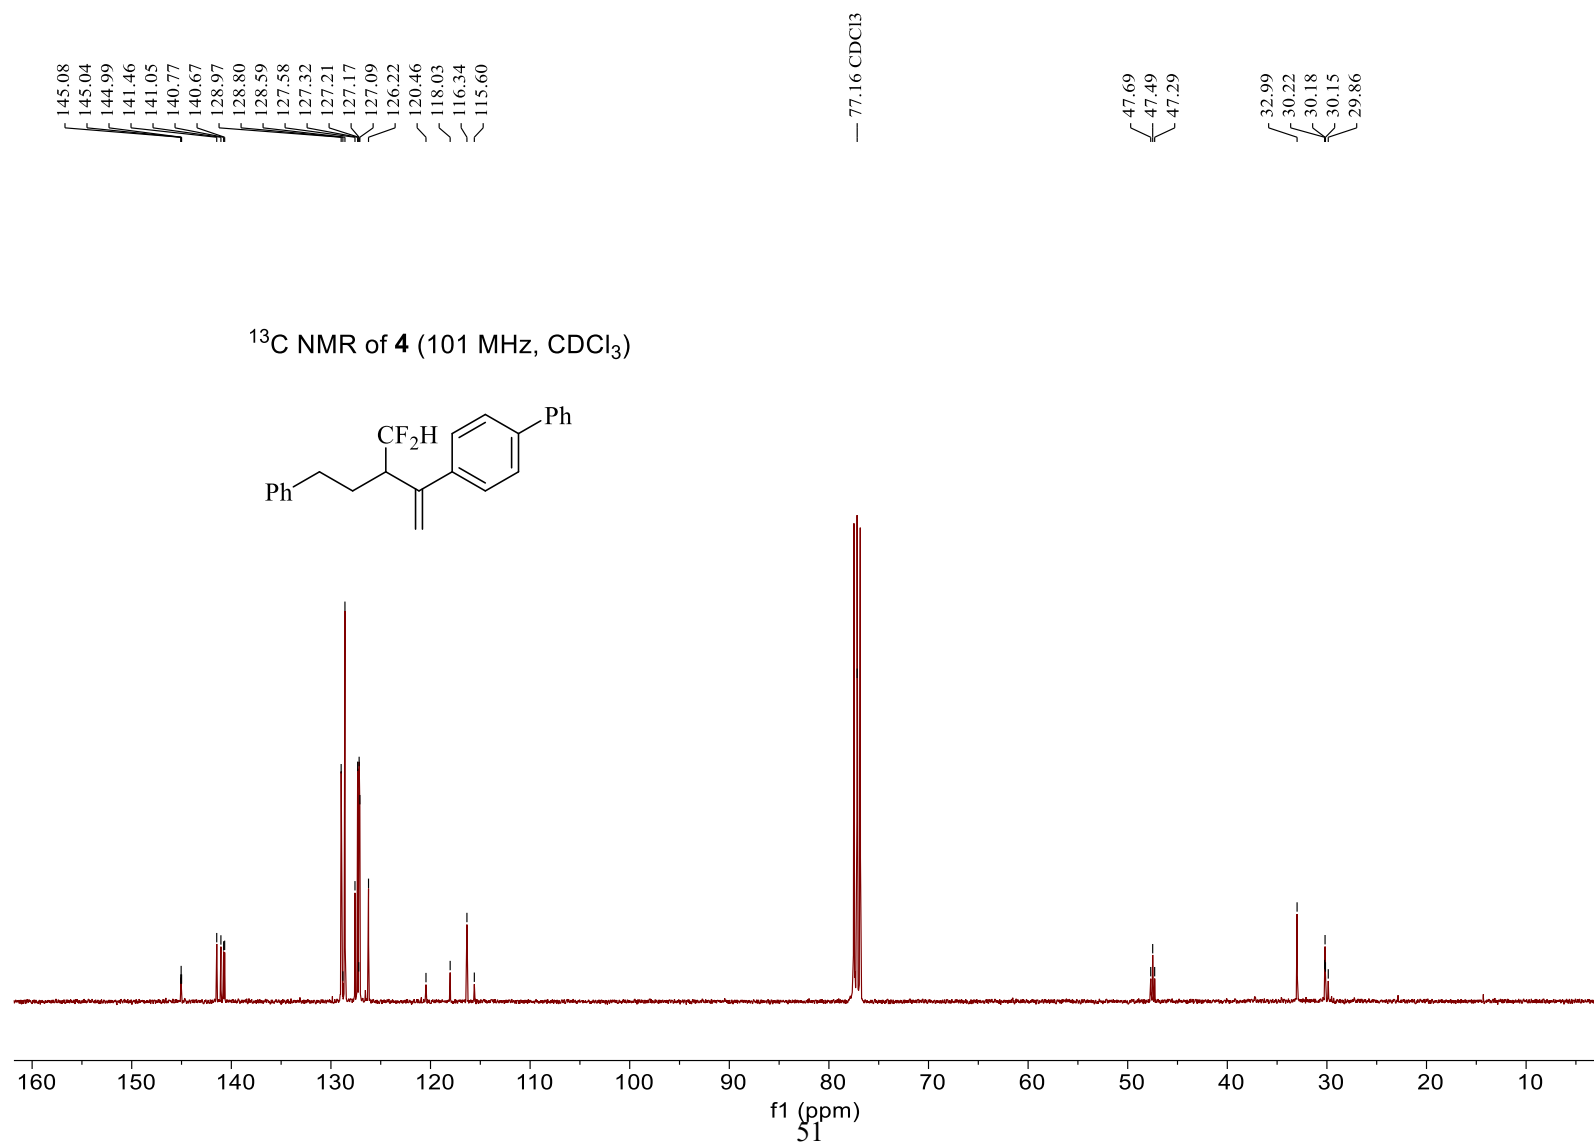

$^{19}\text{F}$  NMR of **4** (376 MHz,  $\text{CDCl}_3$ )

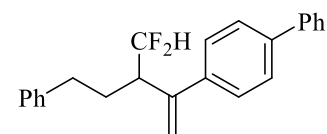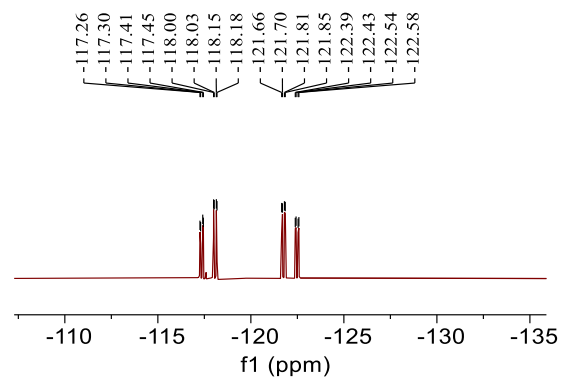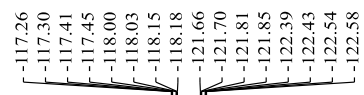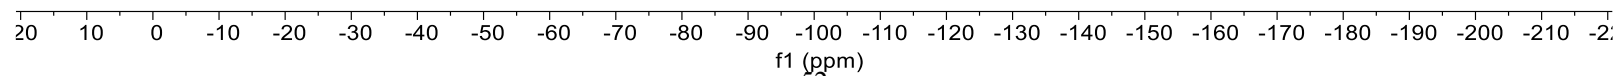



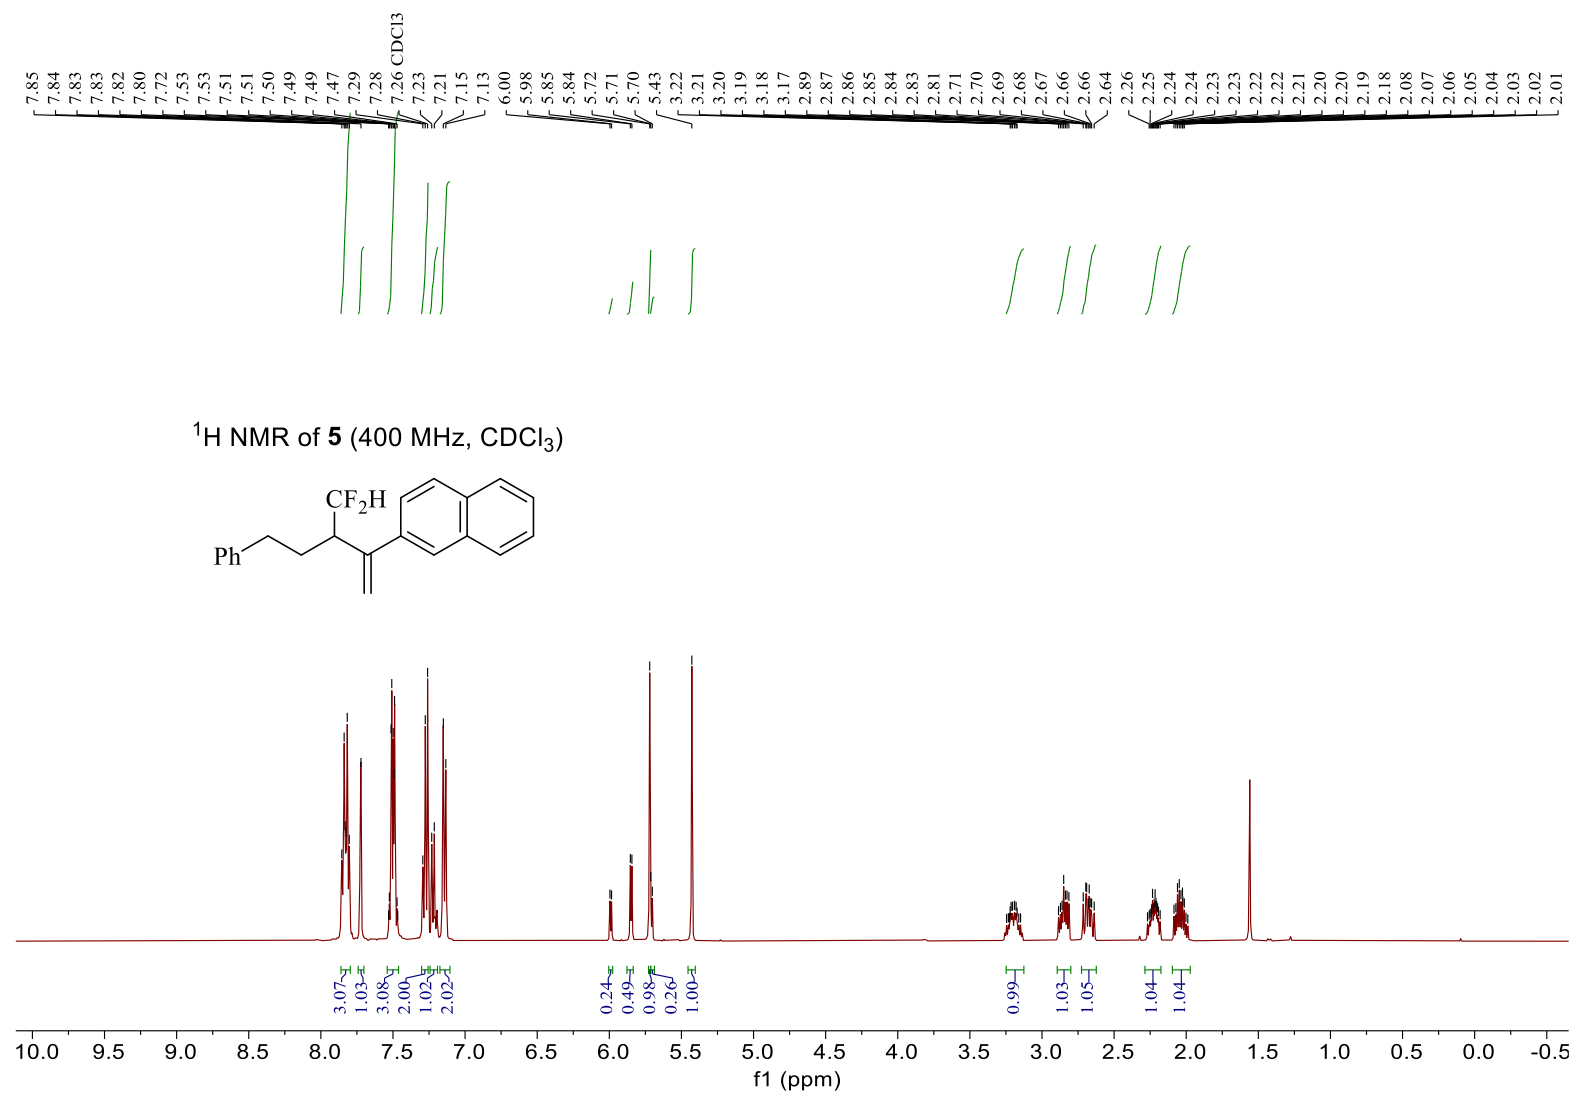

<sup>13</sup>C NMR of **5** (101 MHz, CDCl<sub>3</sub>)

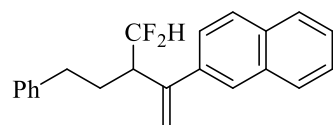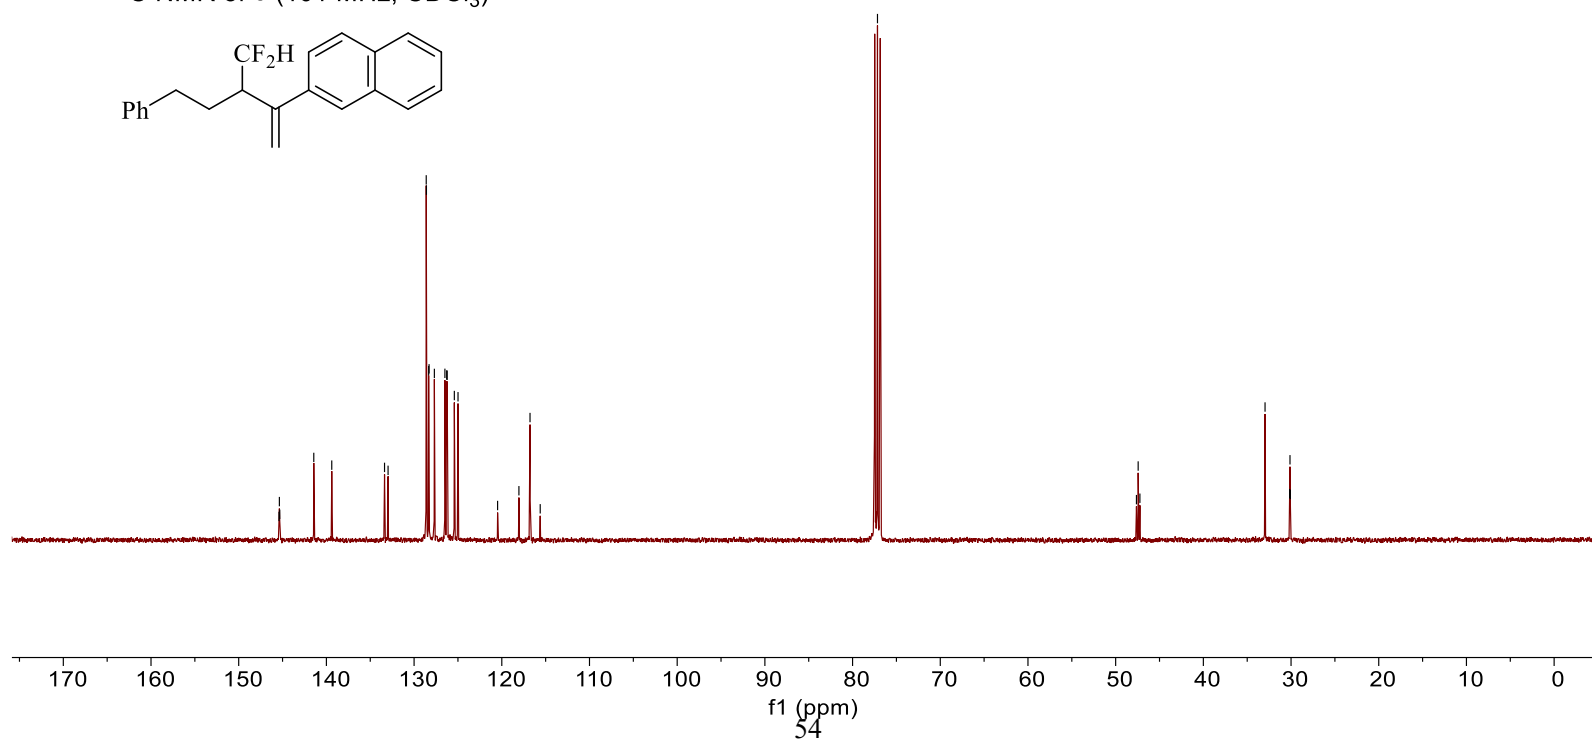

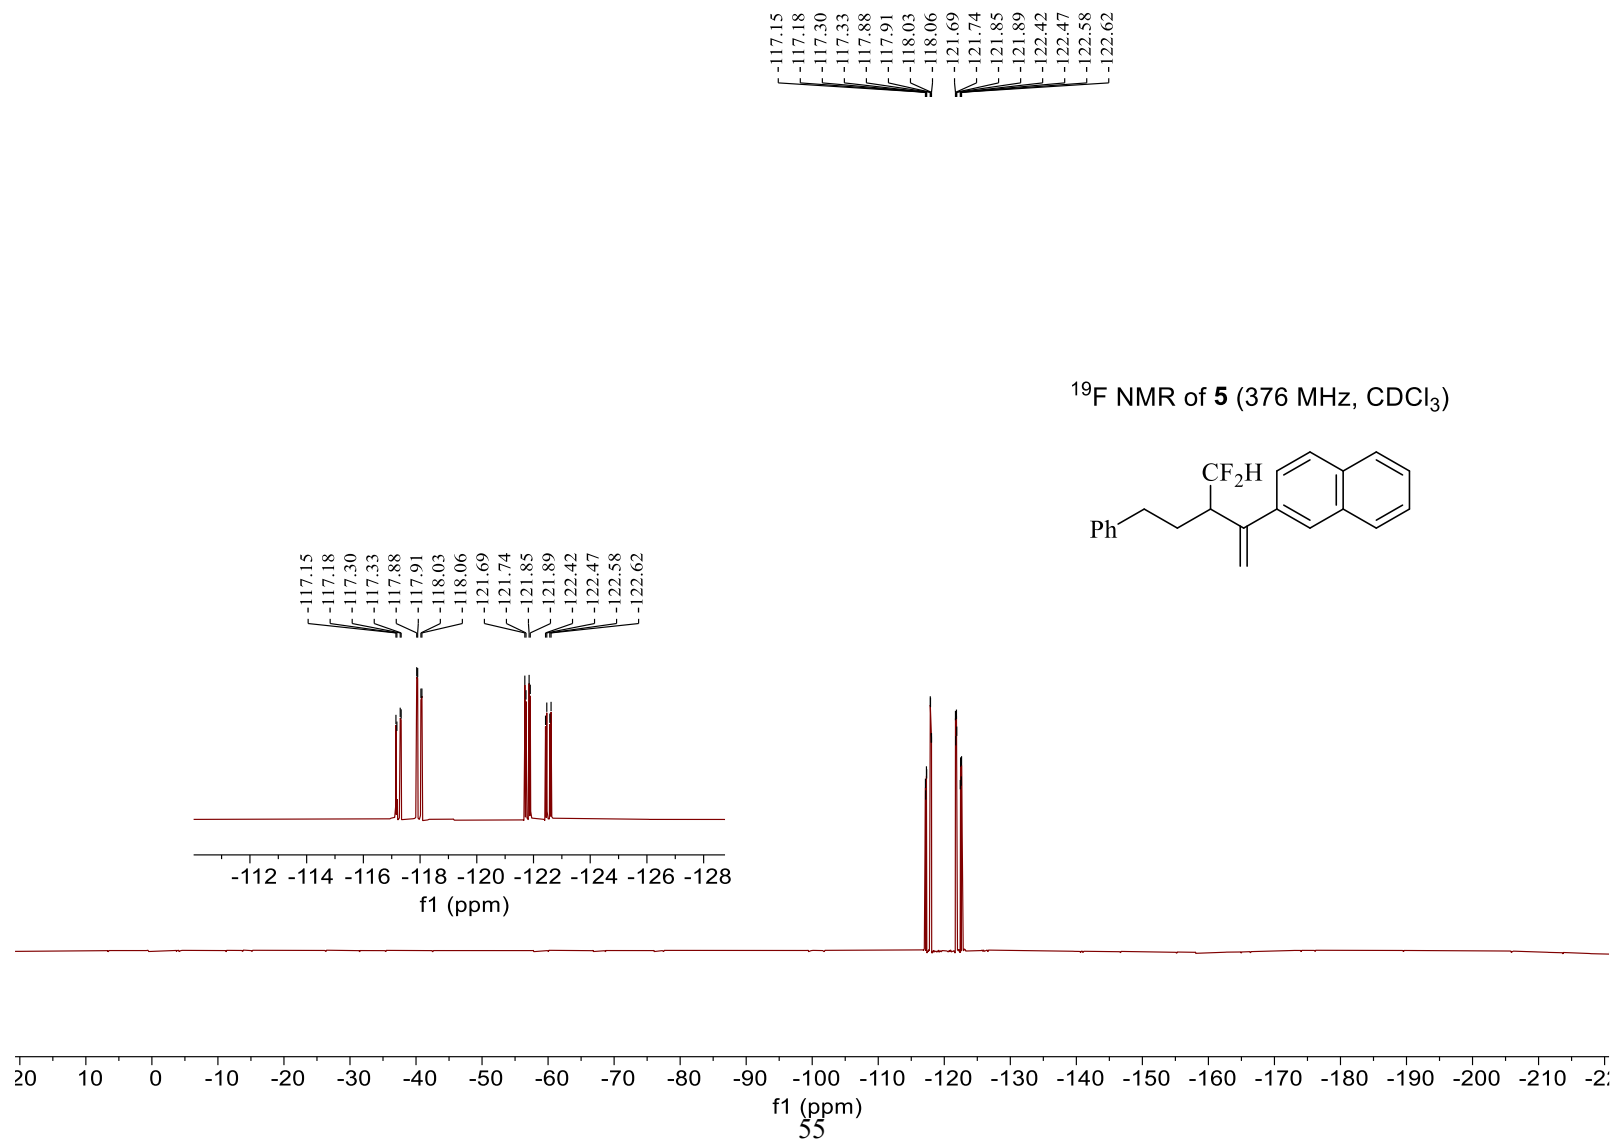

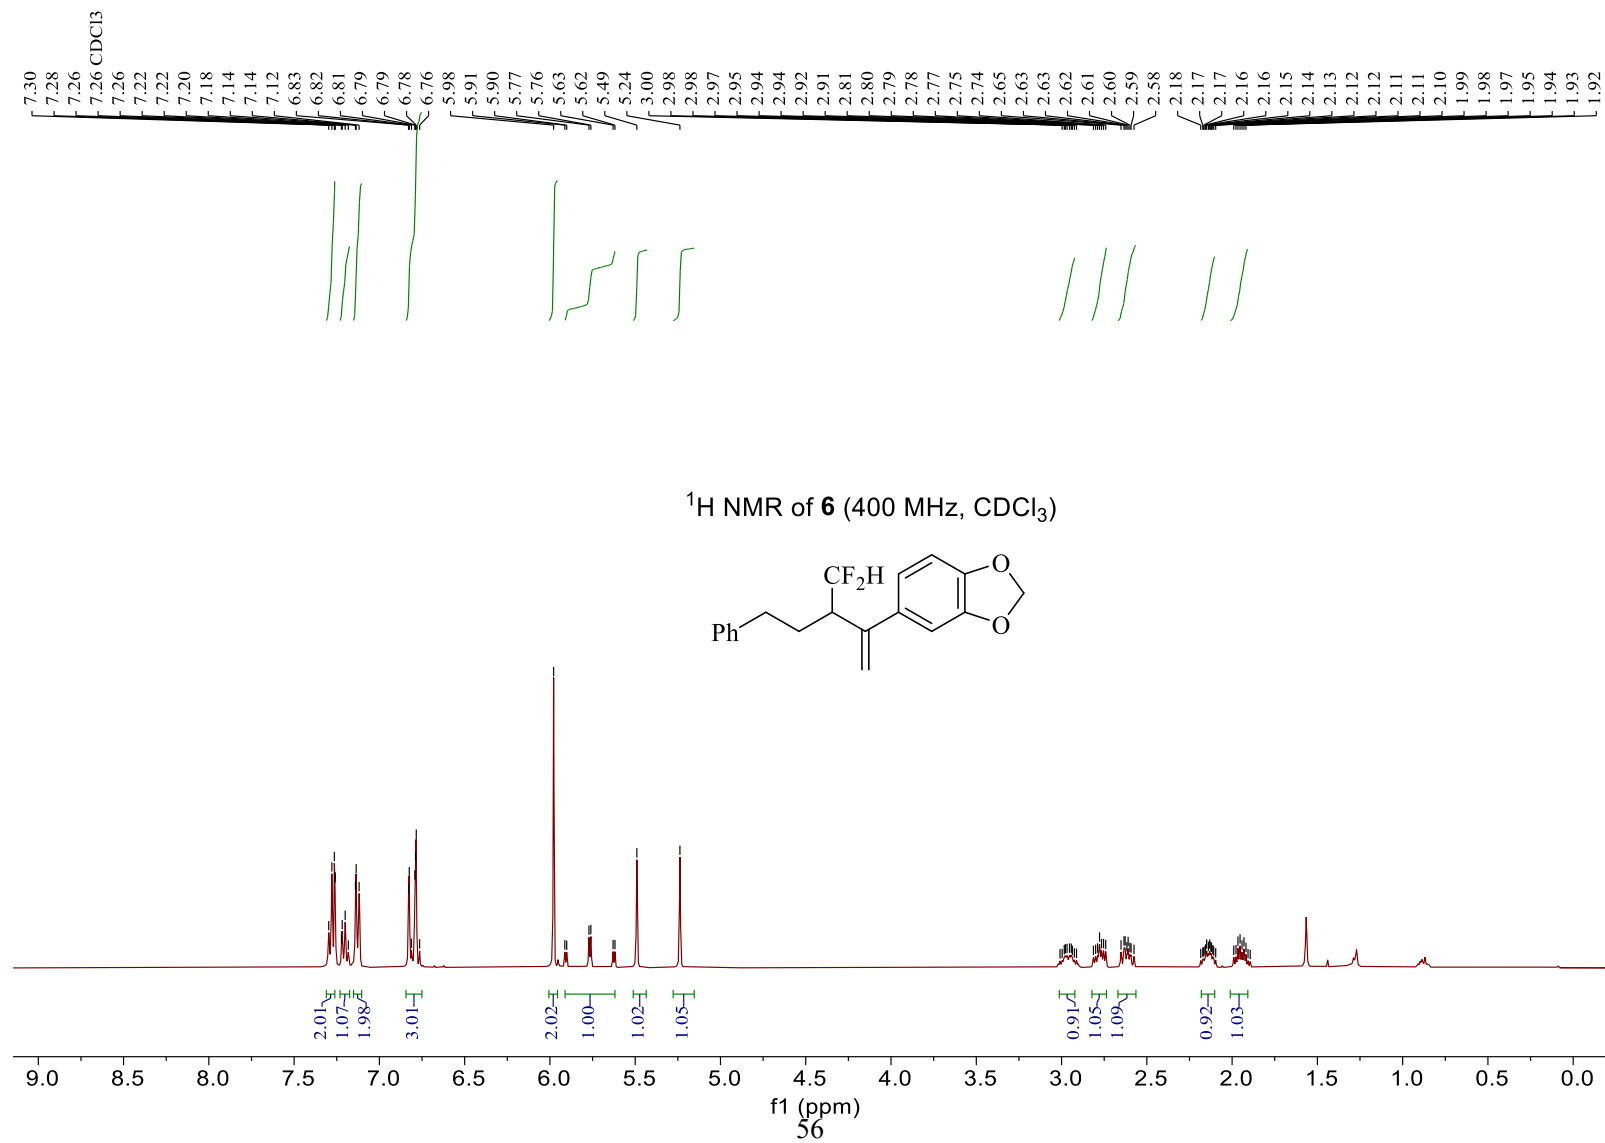

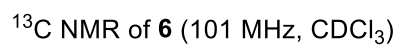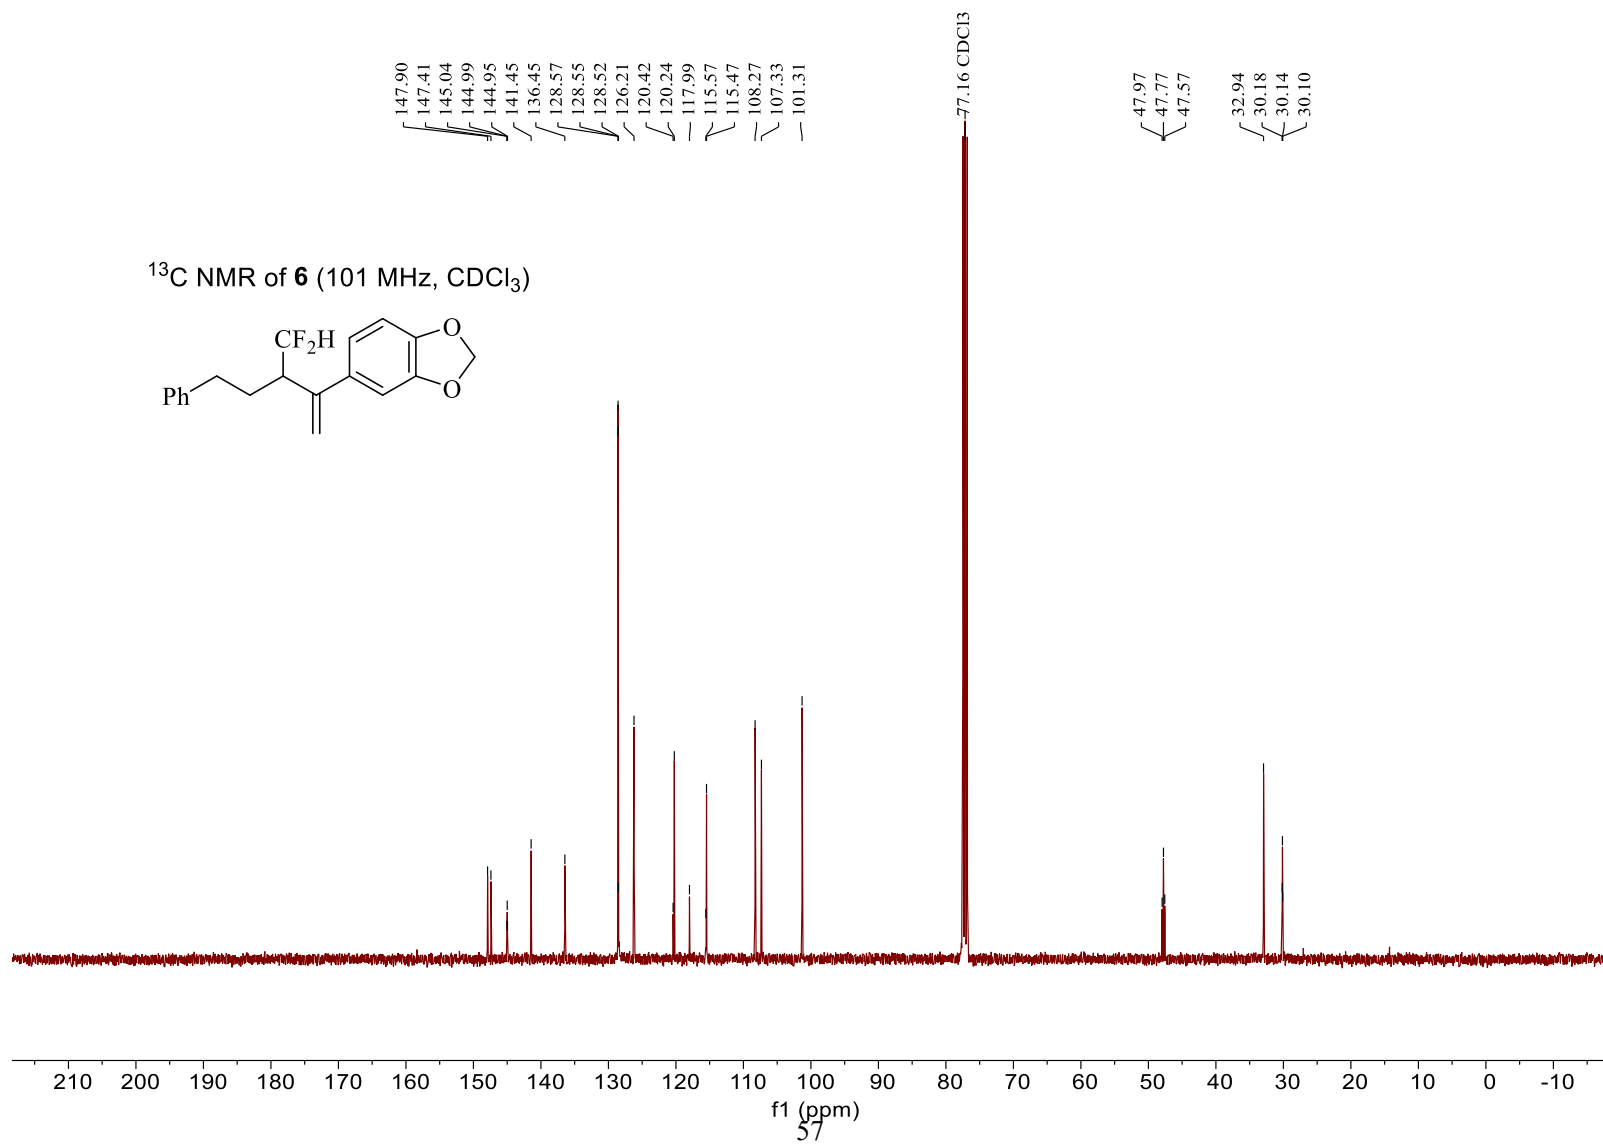

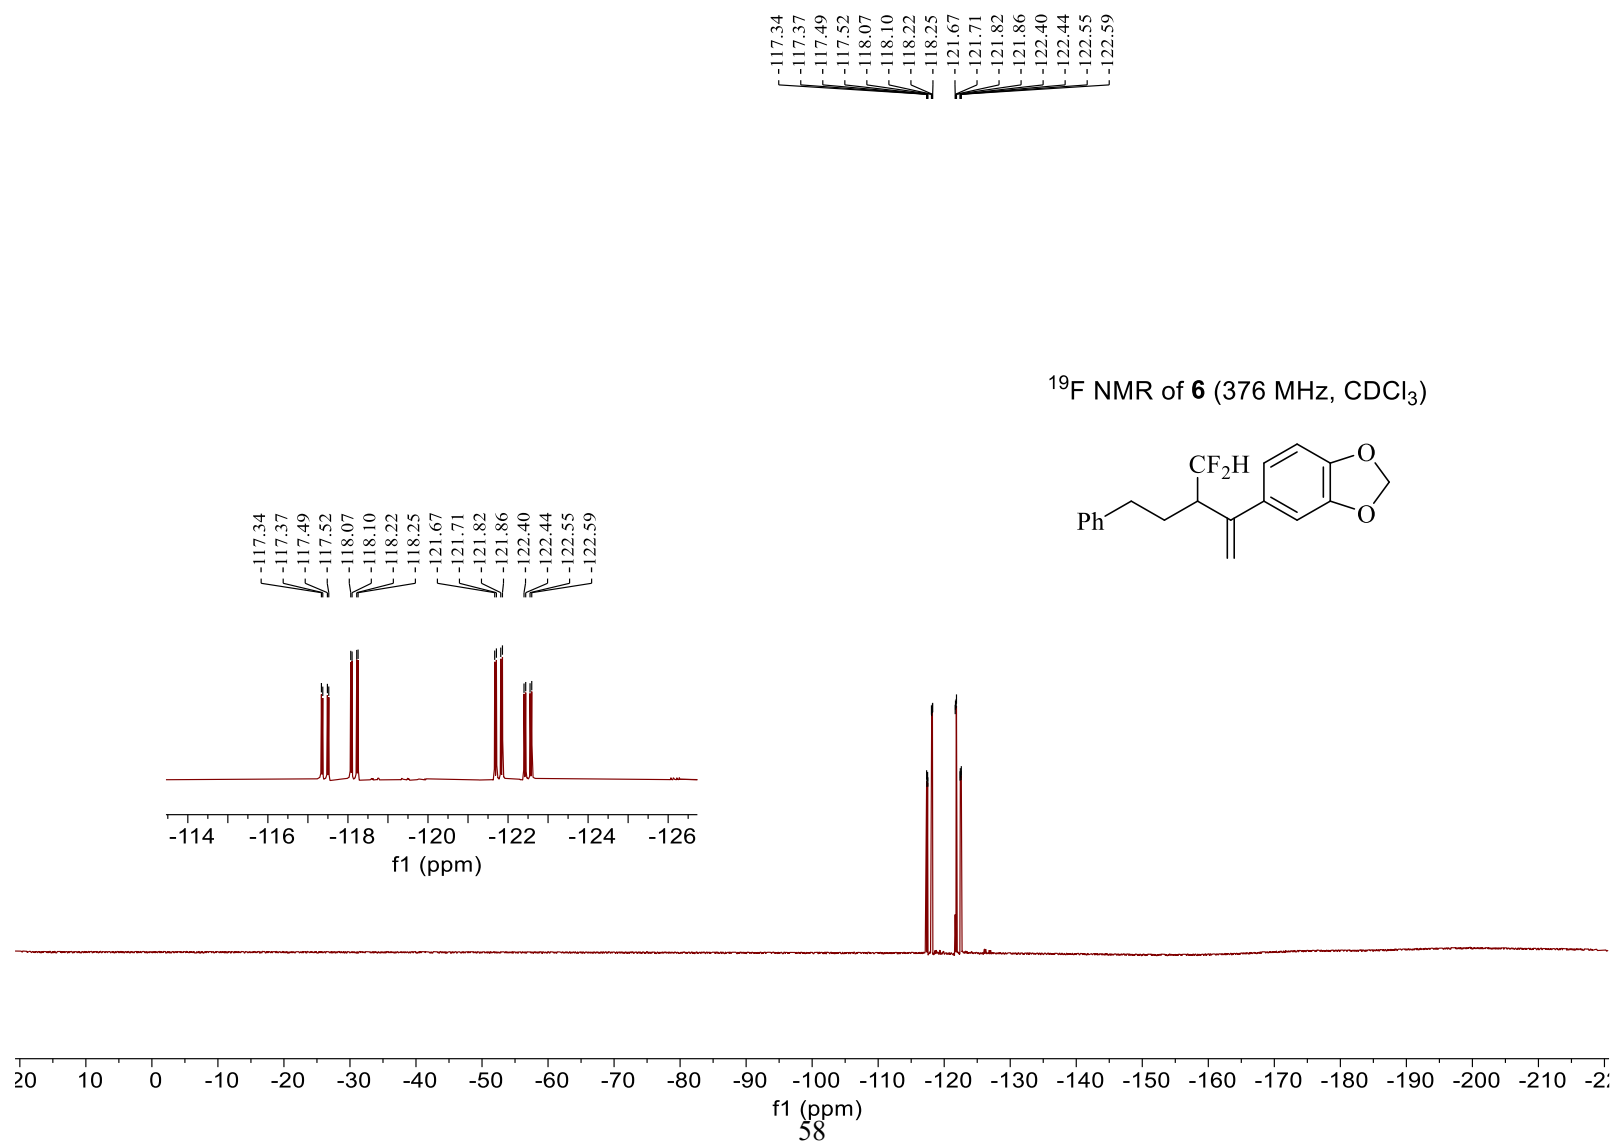

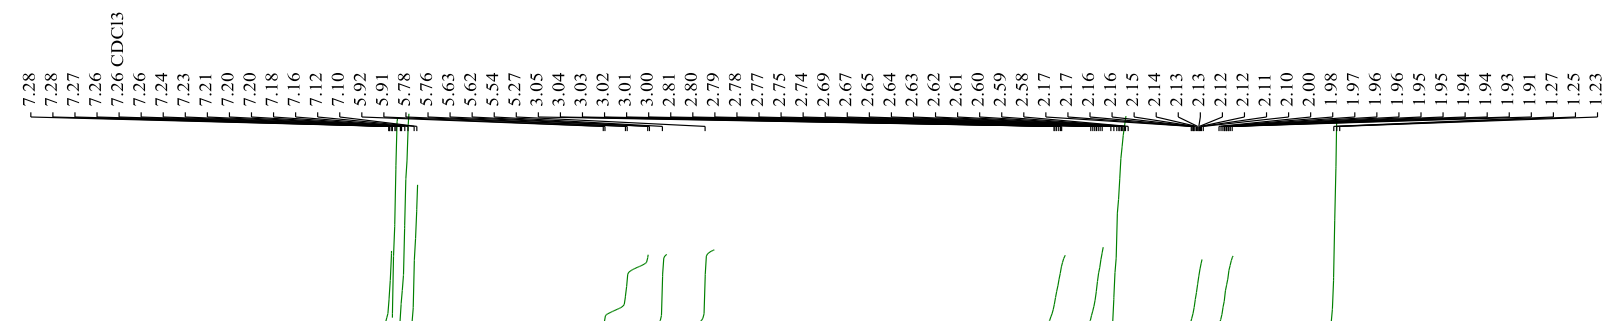

<sup>1</sup>H NMR of 7 (400 MHz, CDCl<sub>3</sub>)

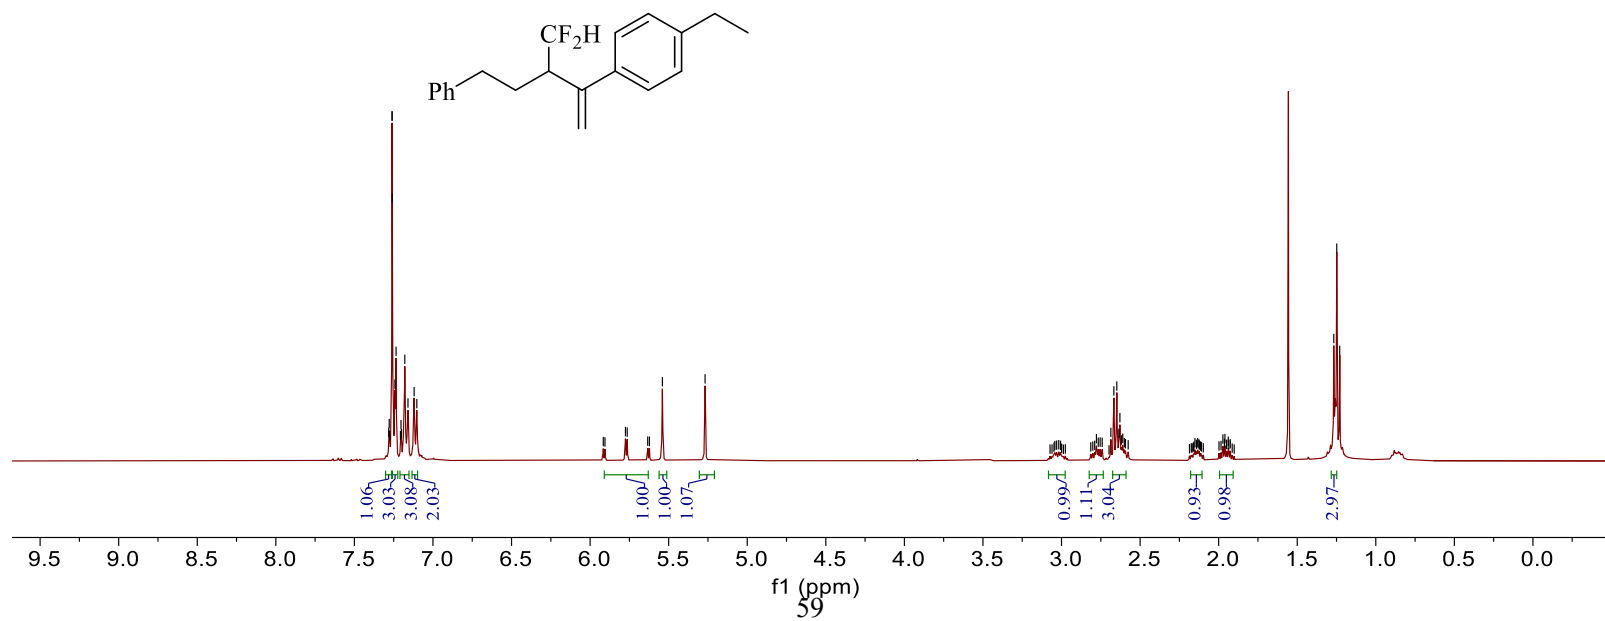

<sup>13</sup>C NMR of **7** (101 MHz, CDCl<sub>3</sub>)

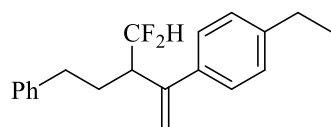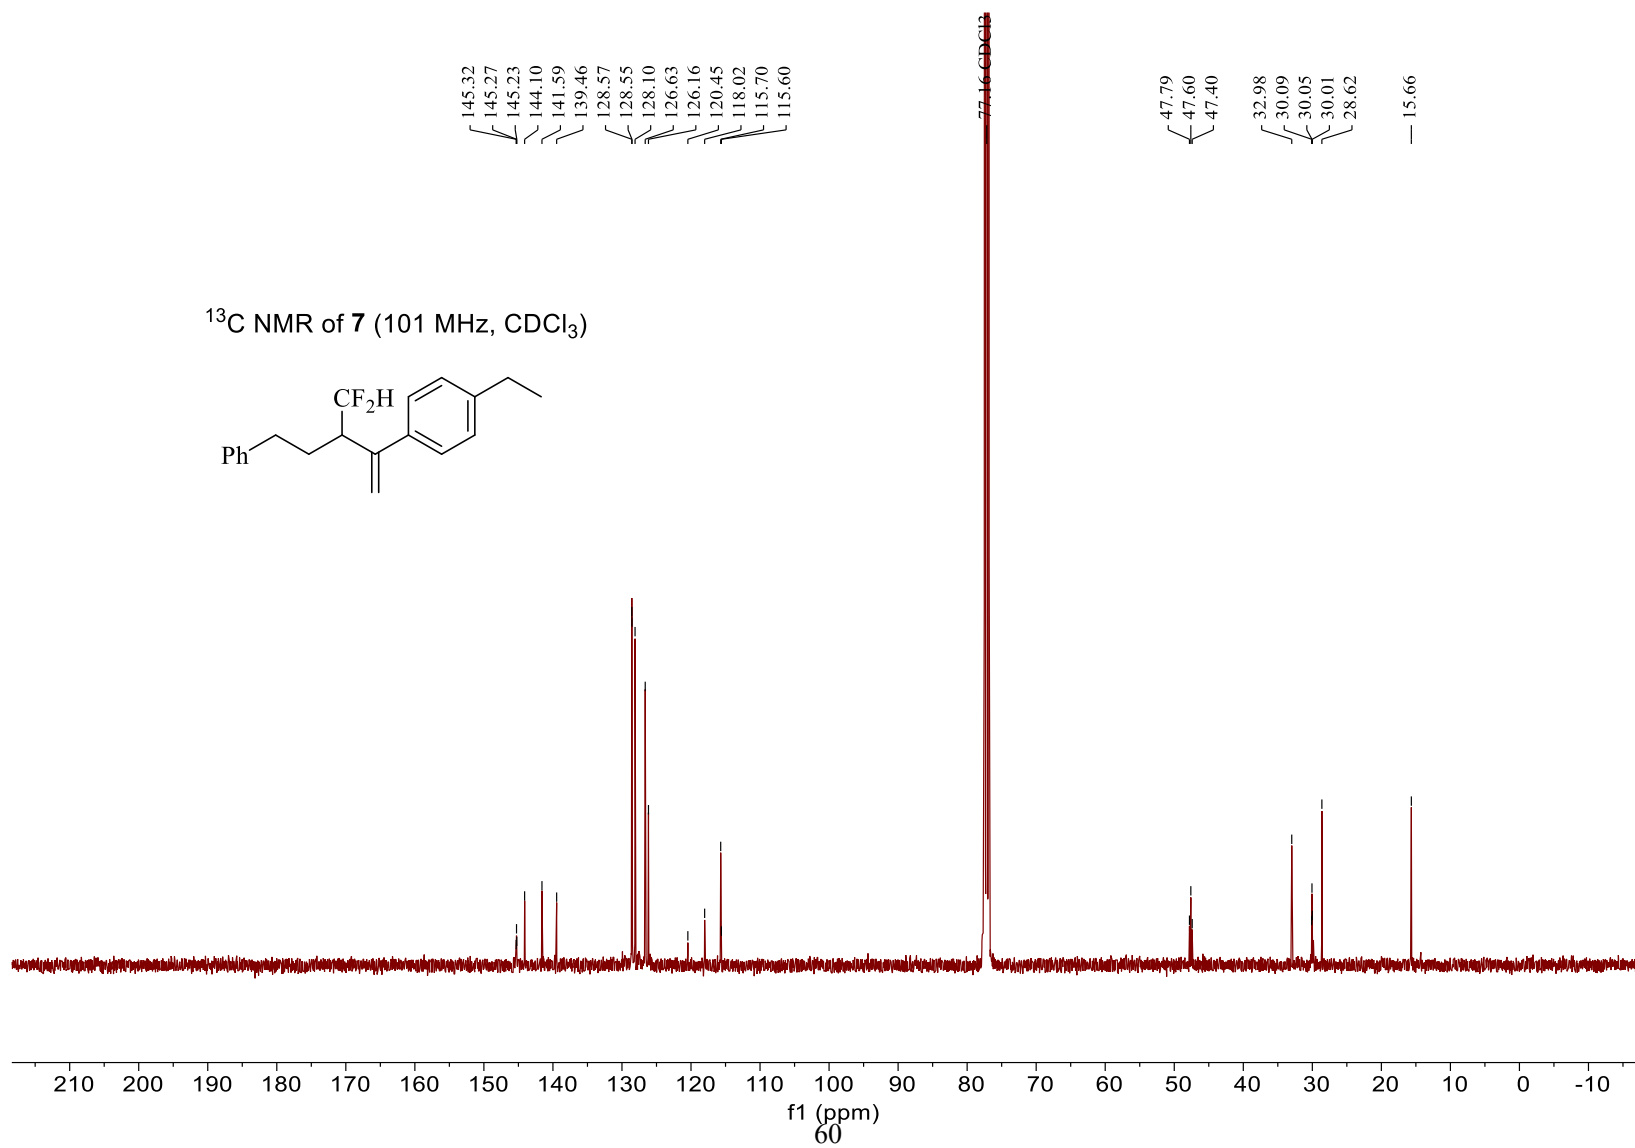



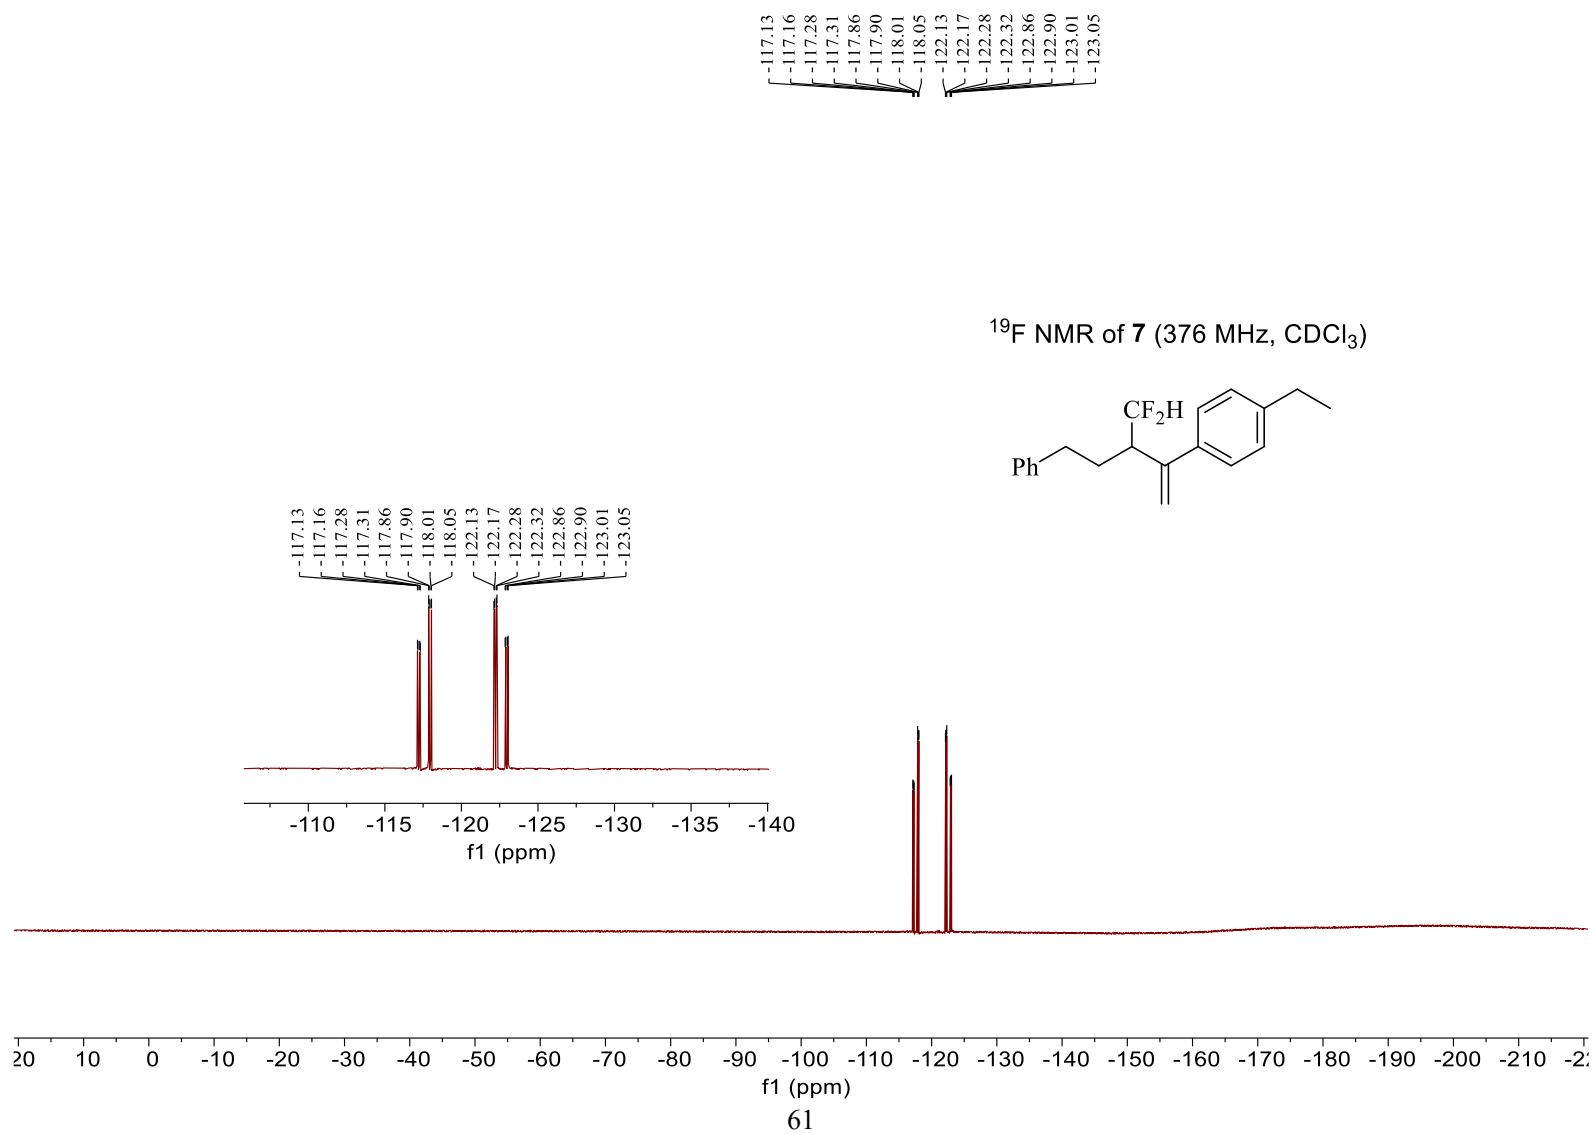

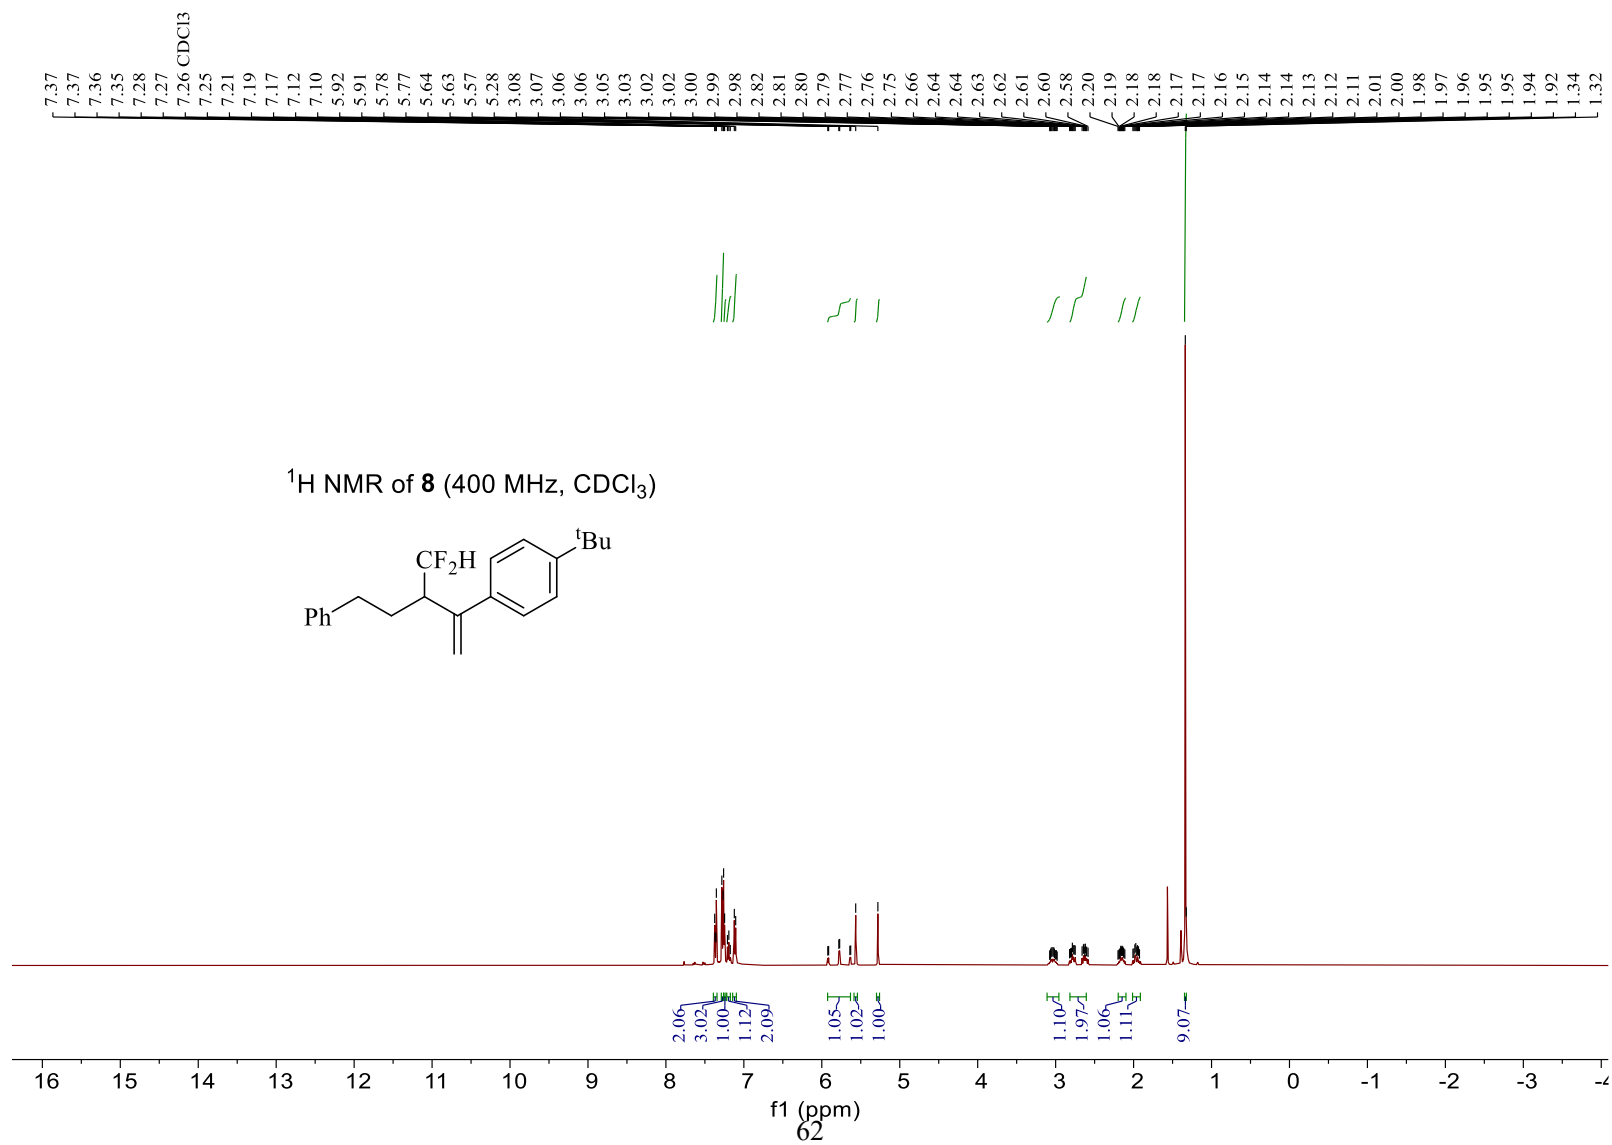

$^{13}\text{C}$  NMR of **8** (101 MHz,  $\text{CDCl}_3$ )

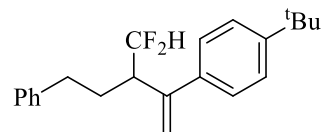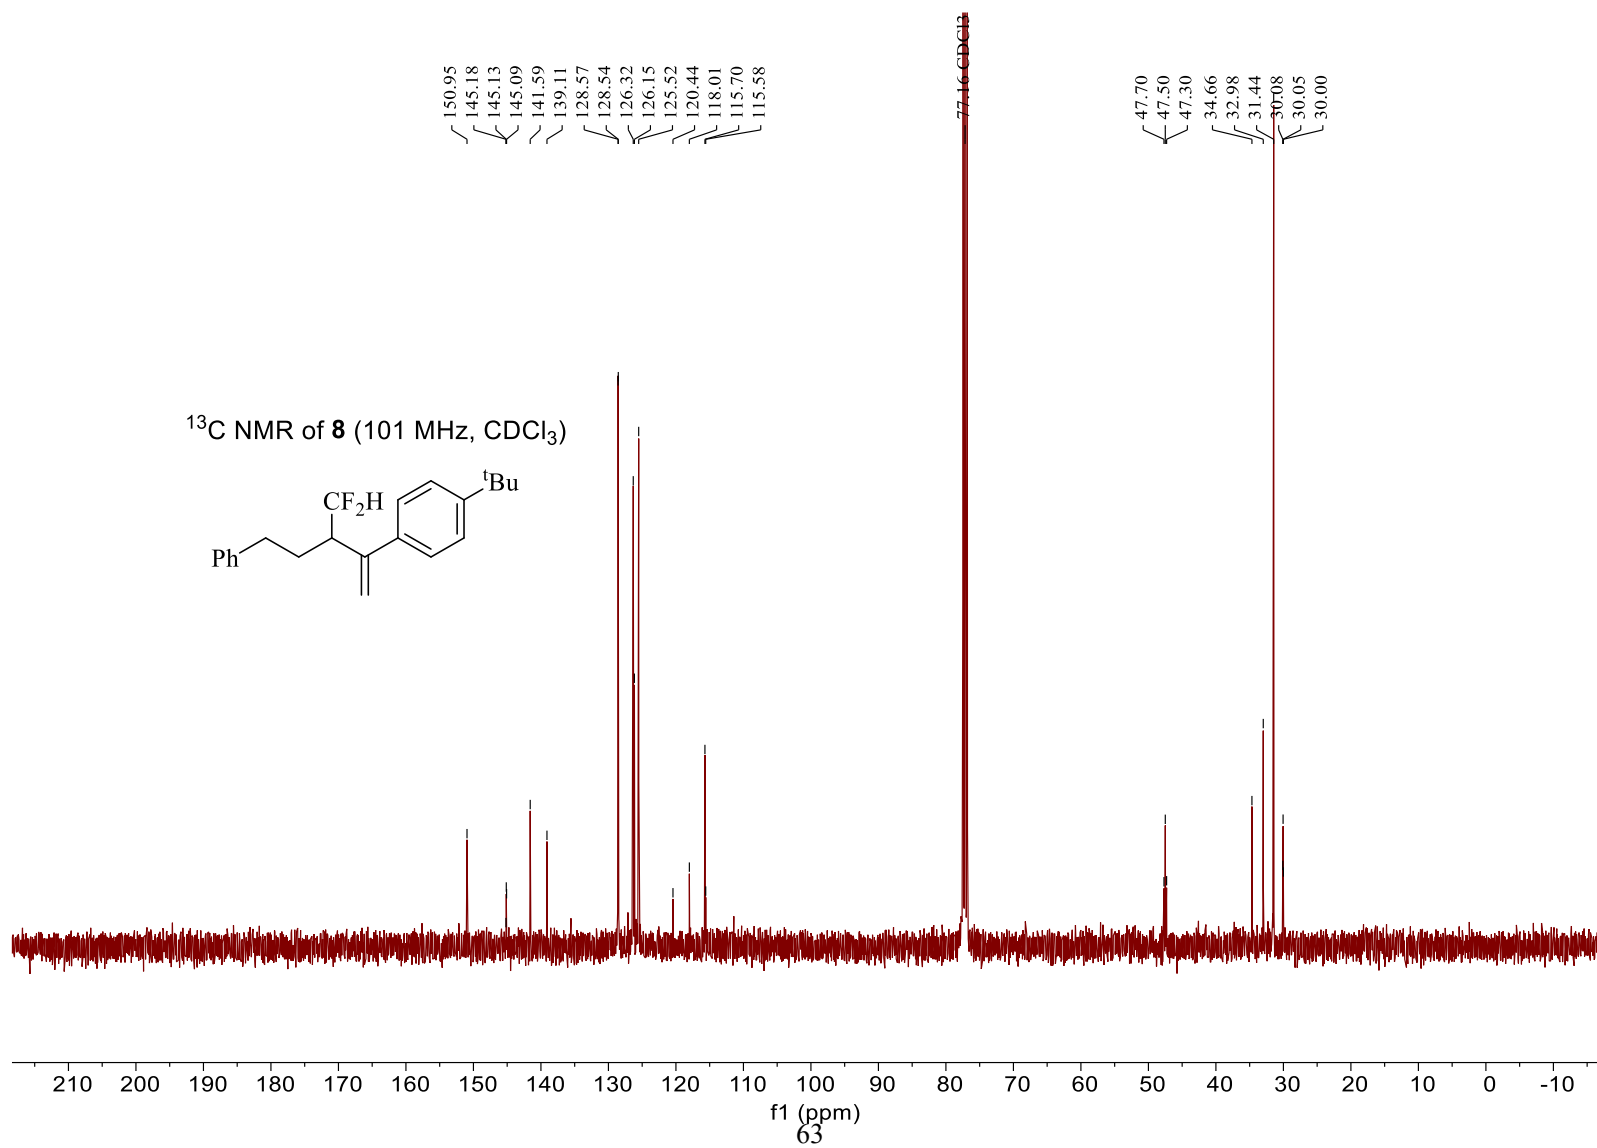

-117.14  
-117.17  
-117.29  
-117.32  
-117.87  
-117.90  
-118.02  
-118.05  
-122.28  
-122.32  
-122.43  
-122.47  
-123.01  
-123.05  
-123.16  
-123.20

$^{19}\text{F}$  NMR of **8** (376 MHz,  $\text{CDCl}_3$ )

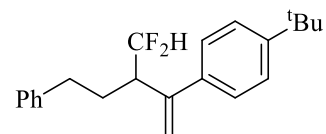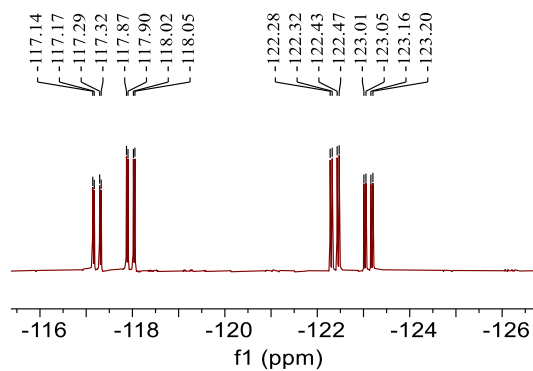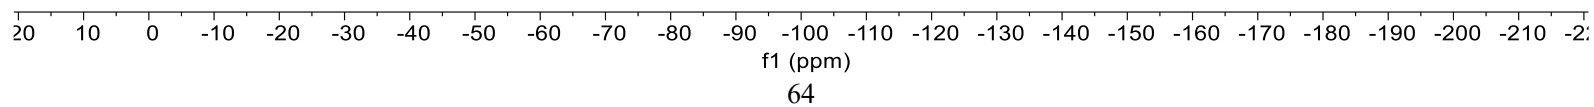

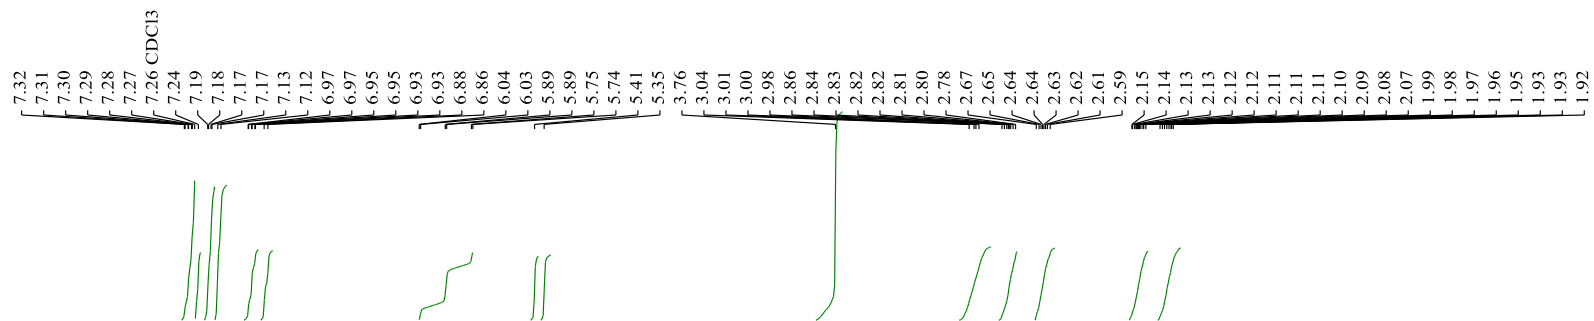

<sup>1</sup>H NMR of **9** (400 MHz, CDCl<sub>3</sub>)

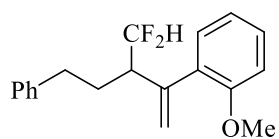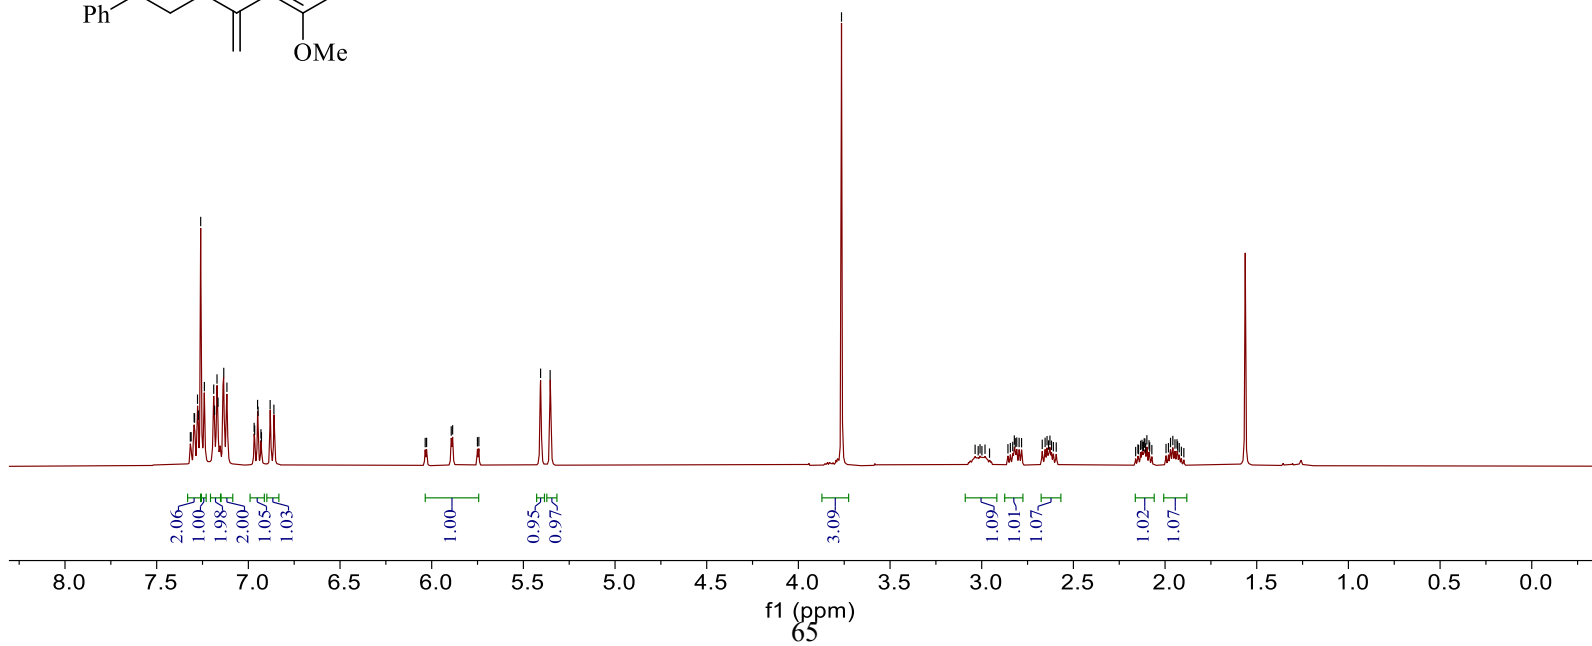

$^{13}\text{C}$  NMR of **9** (101 MHz,  $\text{CDCl}_3$ )

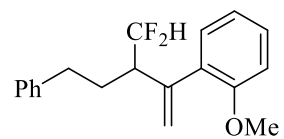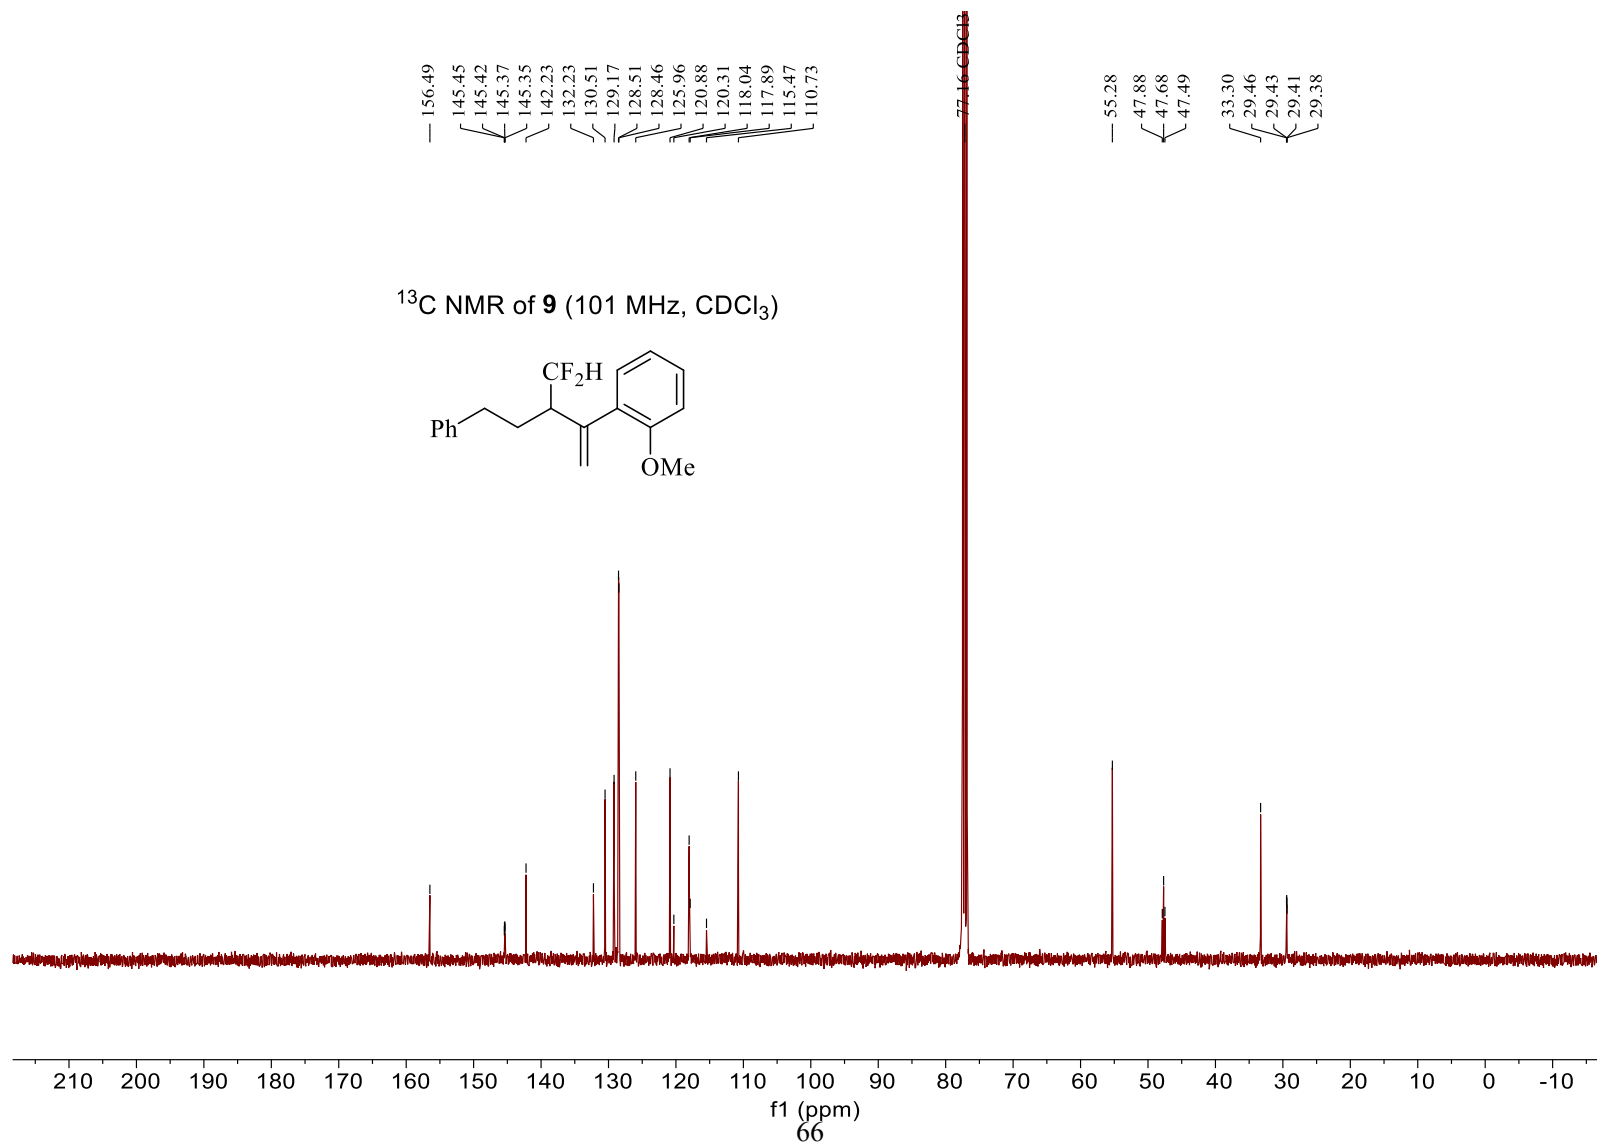

-116.36  
-116.39  
-116.51  
-116.54  
-117.09  
-117.12  
-117.24  
-117.27  
-125.26  
-125.32  
-125.42  
-125.47  
-125.99  
-126.05  
-126.14  
-126.20

<sup>19</sup>F NMR of **9** (376 MHz, CDCl<sub>3</sub>)

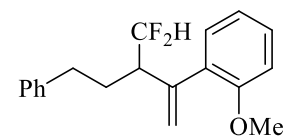

-116.36  
-116.39  
-116.51  
-116.54  
-117.09  
-117.12  
-117.24  
-117.27  
-125.26  
-125.32  
-125.42  
-125.47  
-125.99  
-126.05  
-126.14  
-126.20

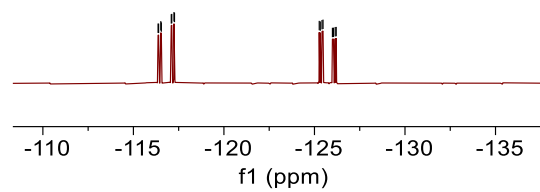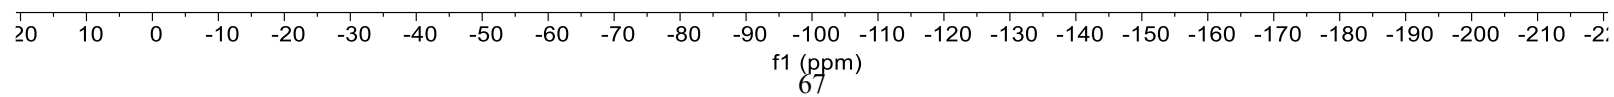

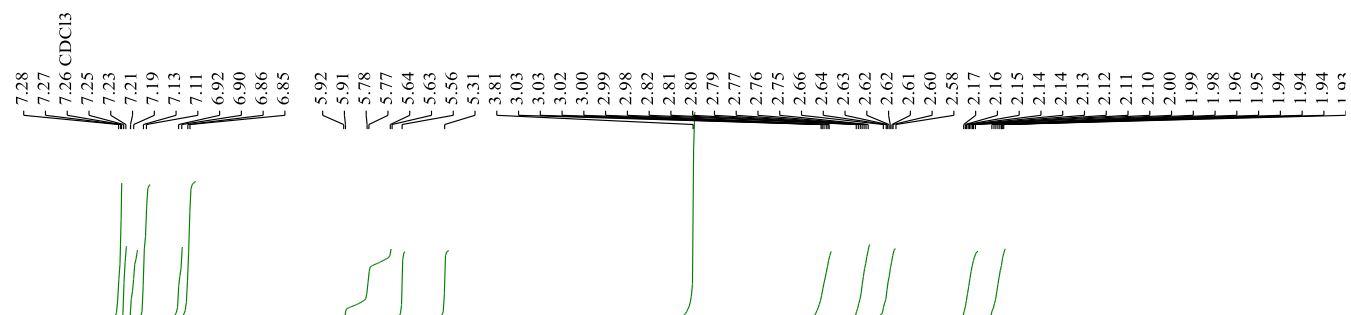

<sup>1</sup>H NMR of **10** (400 MHz, CDCl<sub>3</sub>)

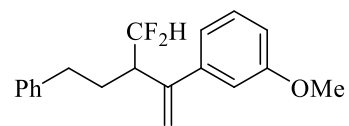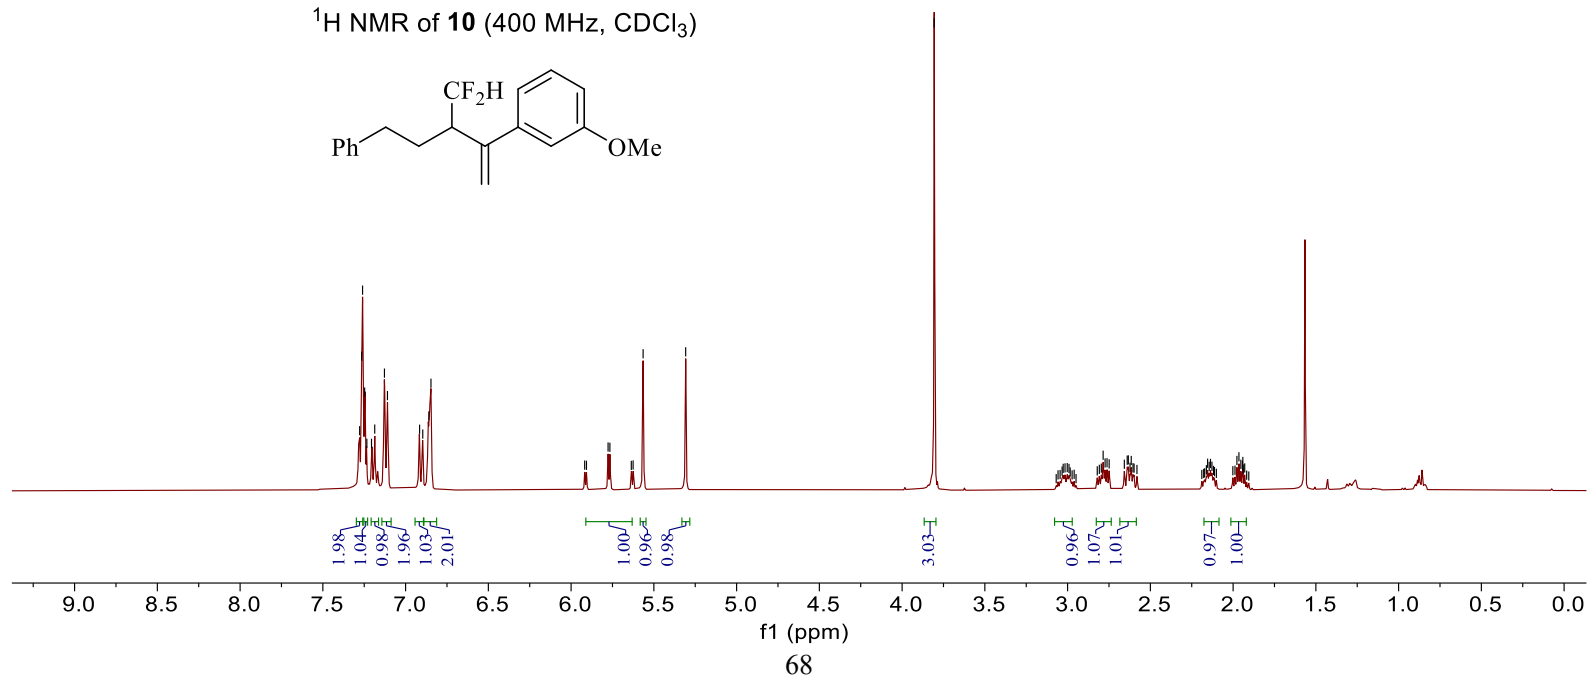



$^{13}\text{C}$  NMR of **10** (101 MHz,  $\text{CDCl}_3$ )

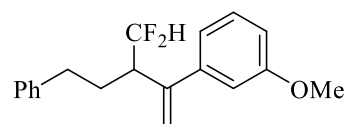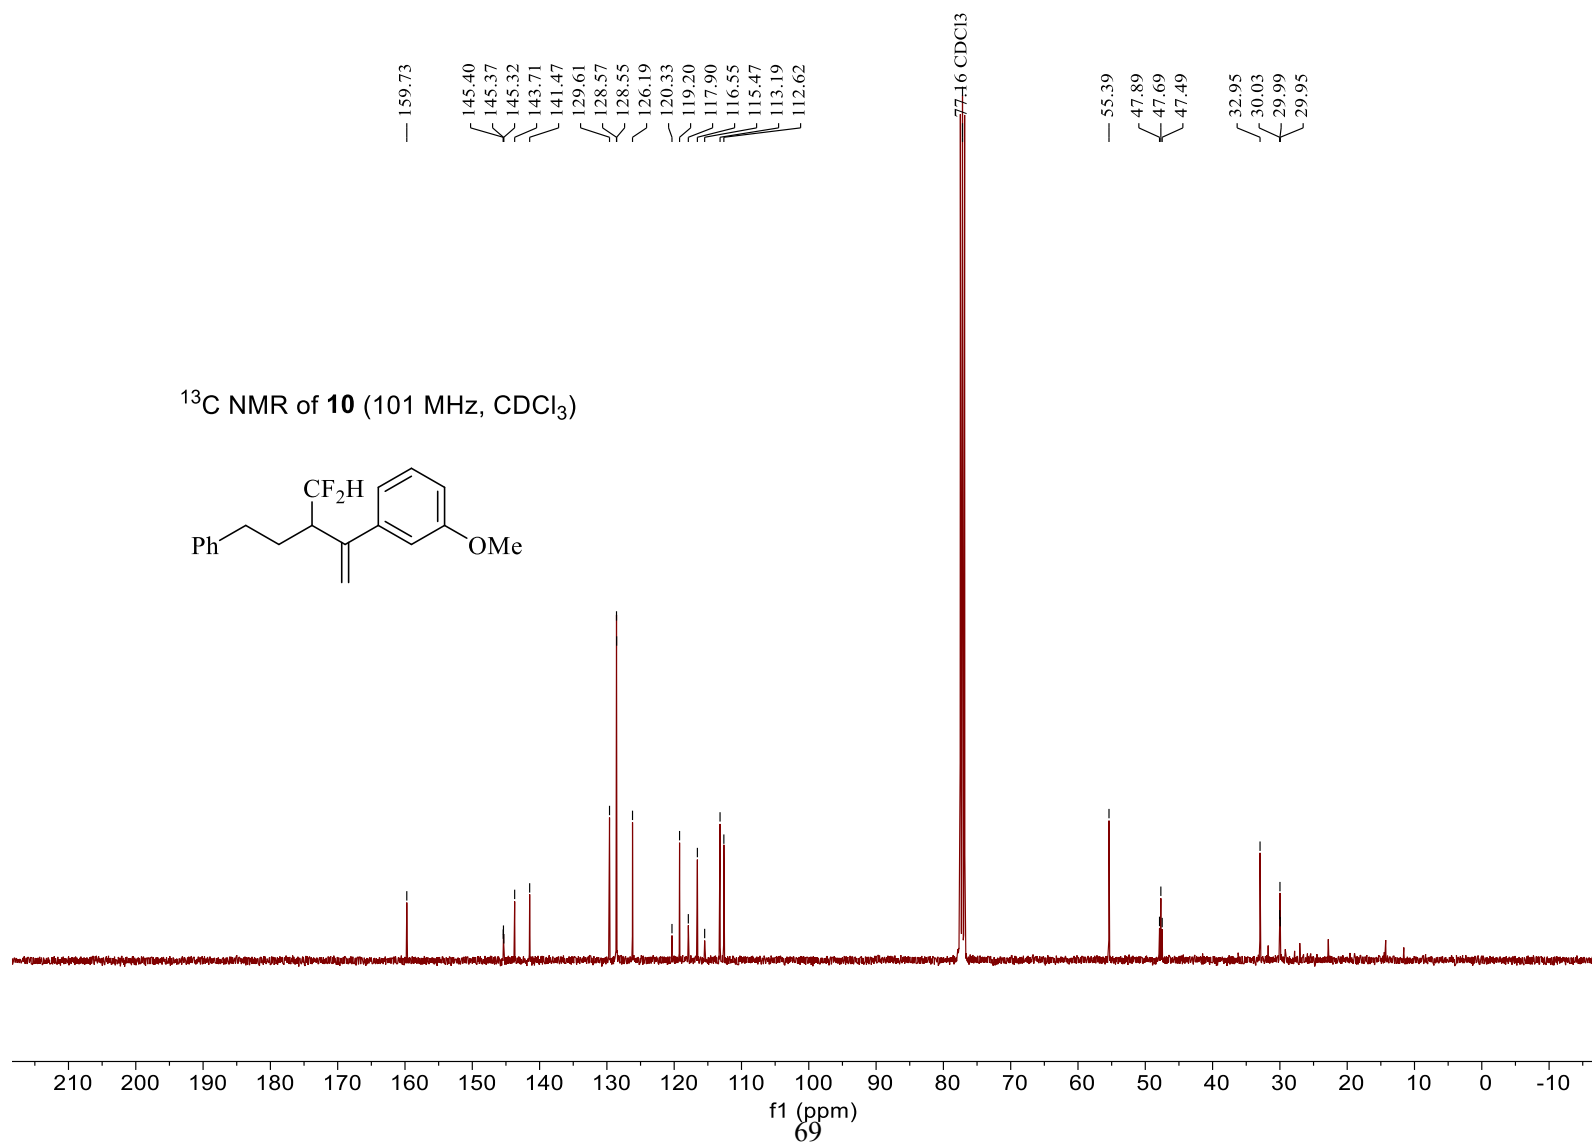

$^{19}\text{F}$  NMR of **10** (376 MHz,  $\text{CDCl}_3$ )

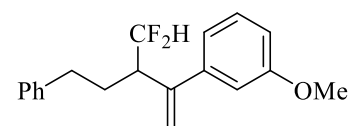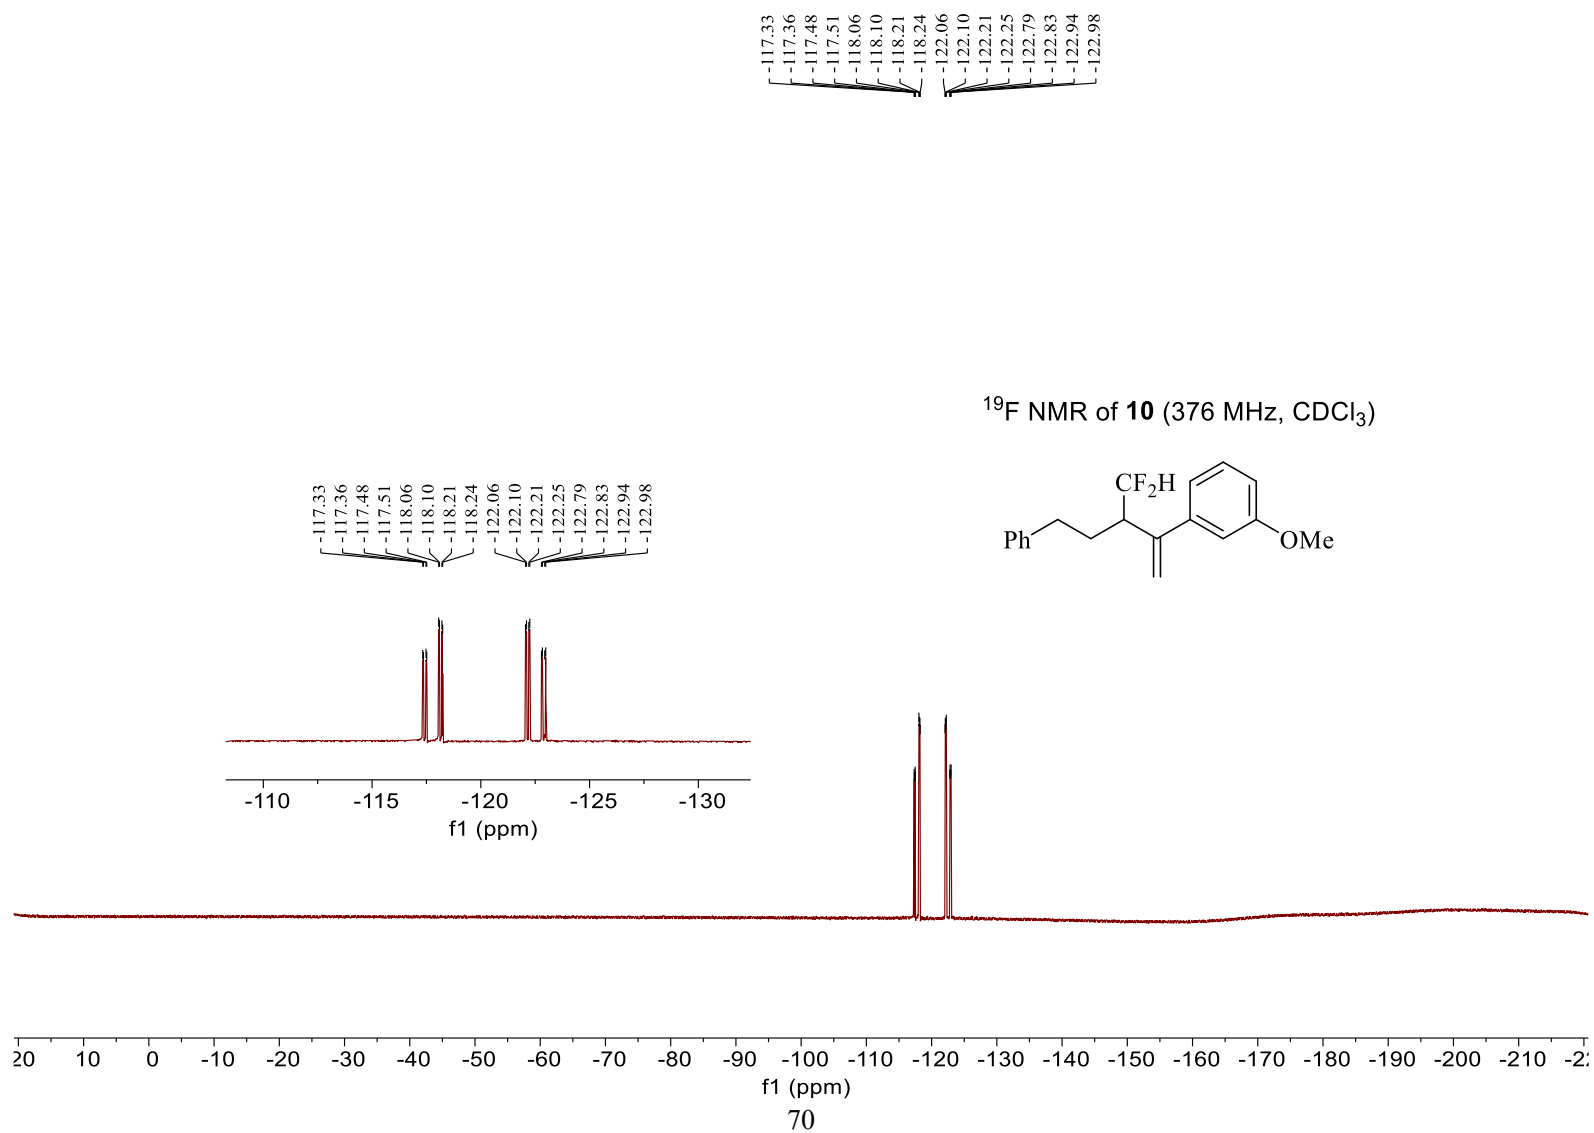

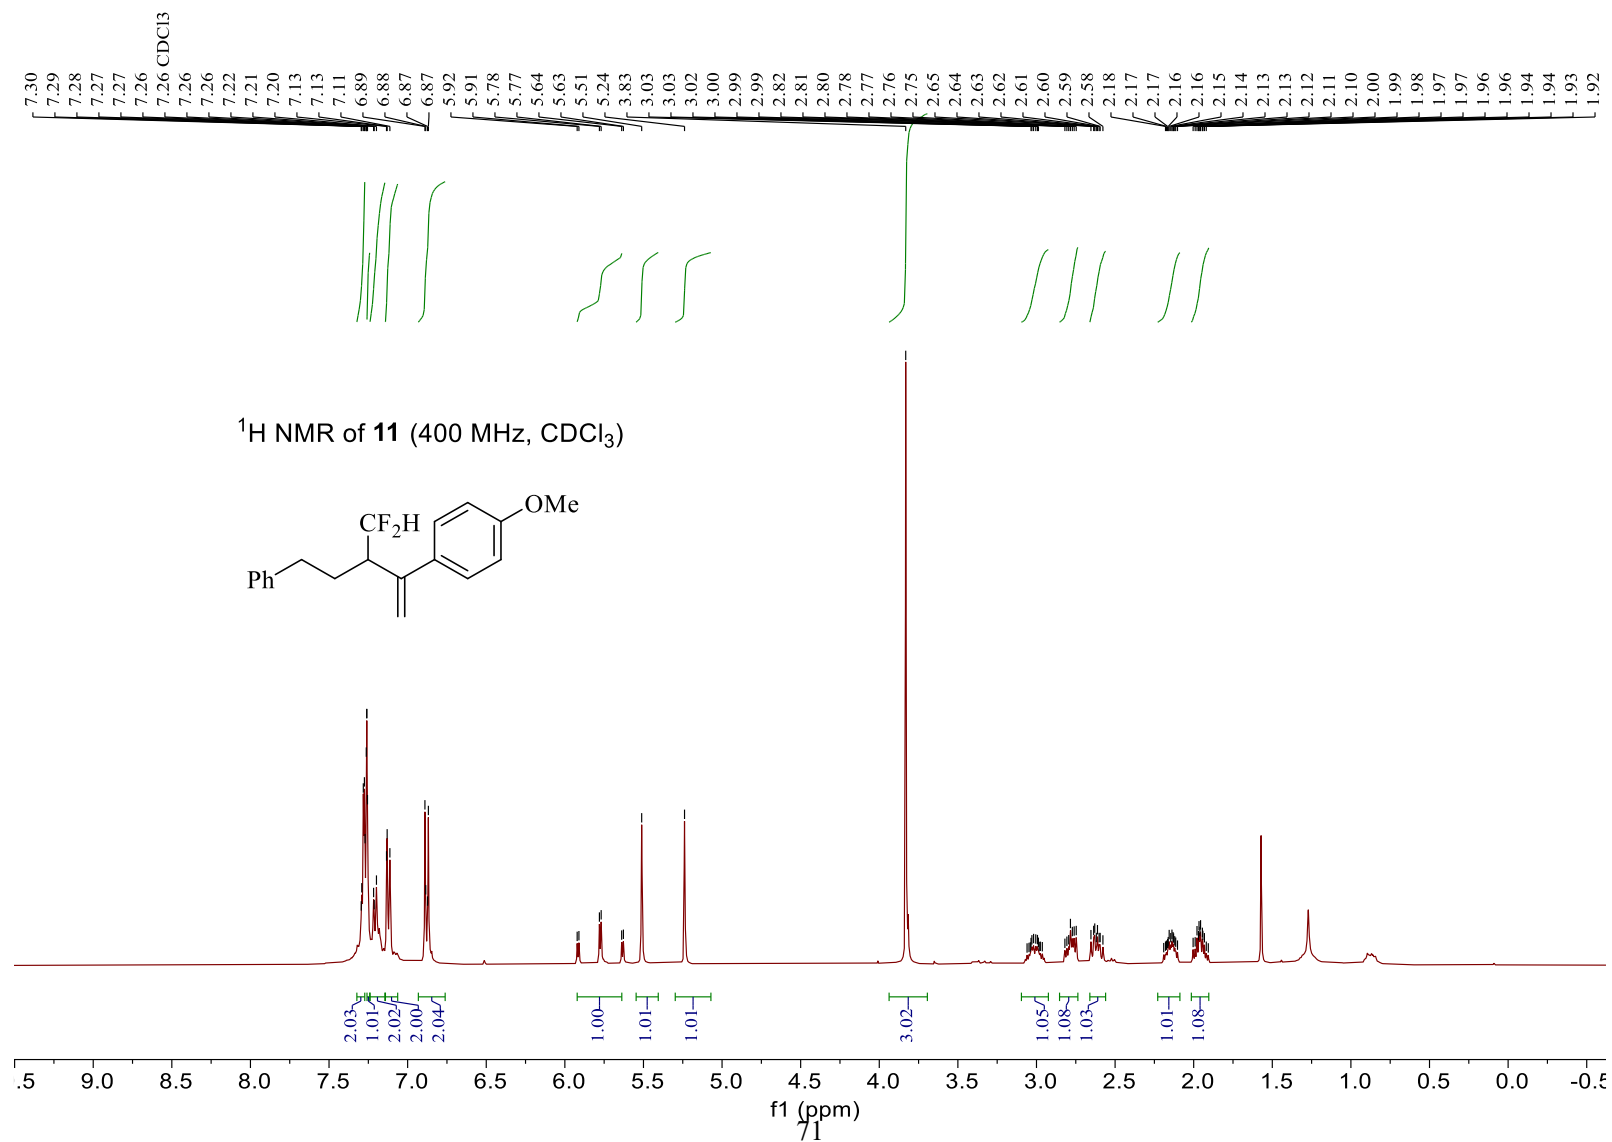

$^{13}\text{C}$  NMR of **11** (101 MHz,  $\text{CDCl}_3$ )

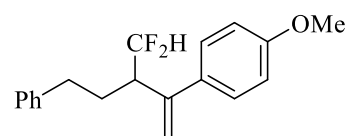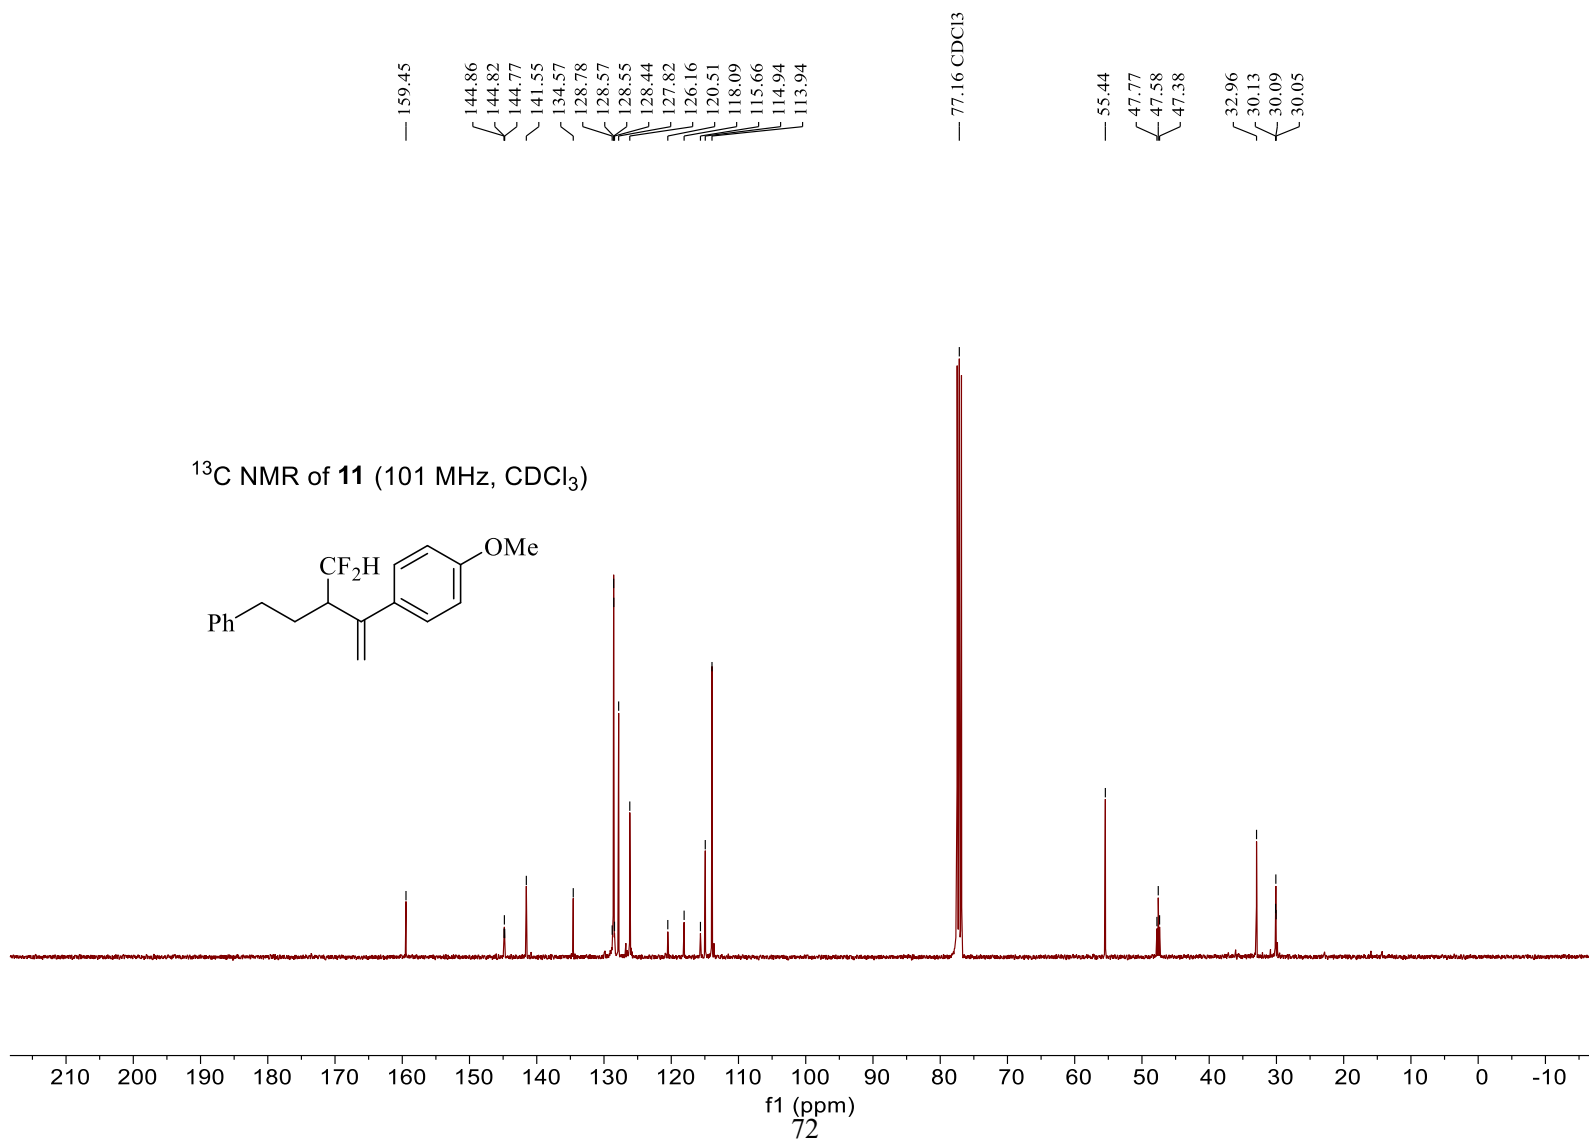

$^{19}\text{F}$  NMR of **11** (376 MHz,  $\text{CDCl}_3$ )

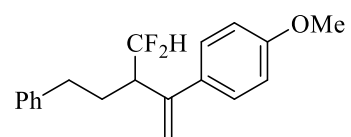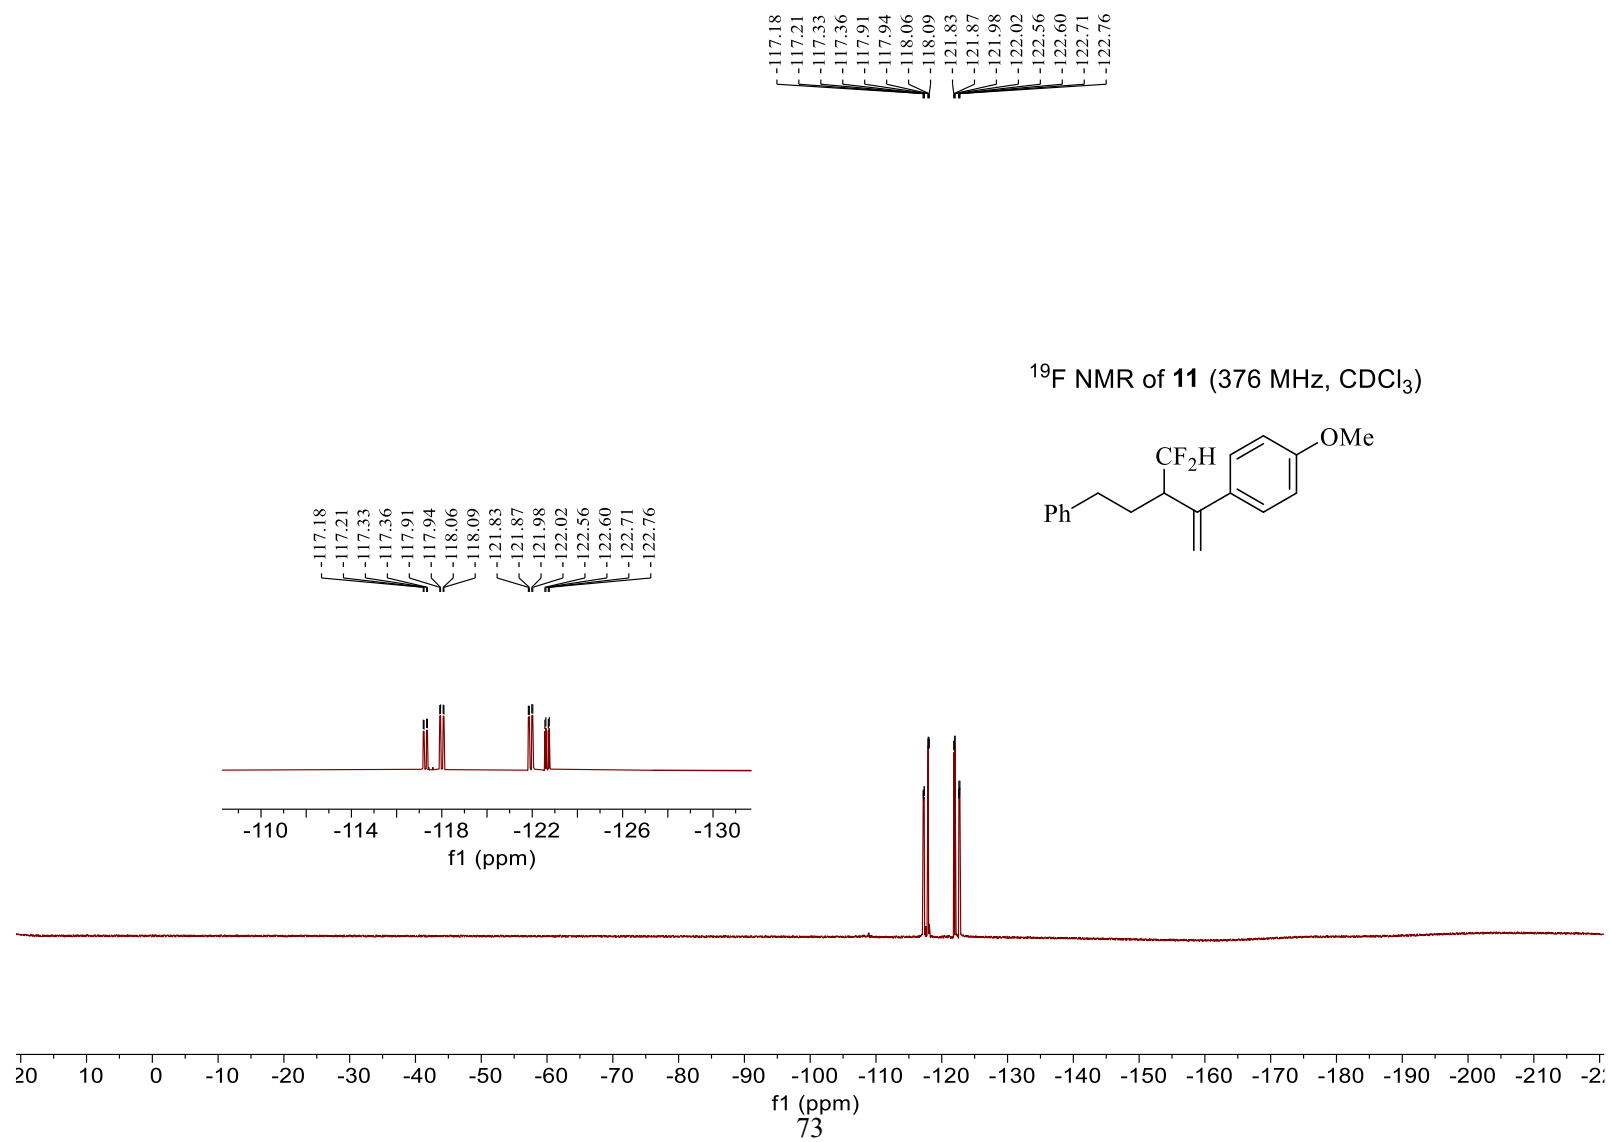

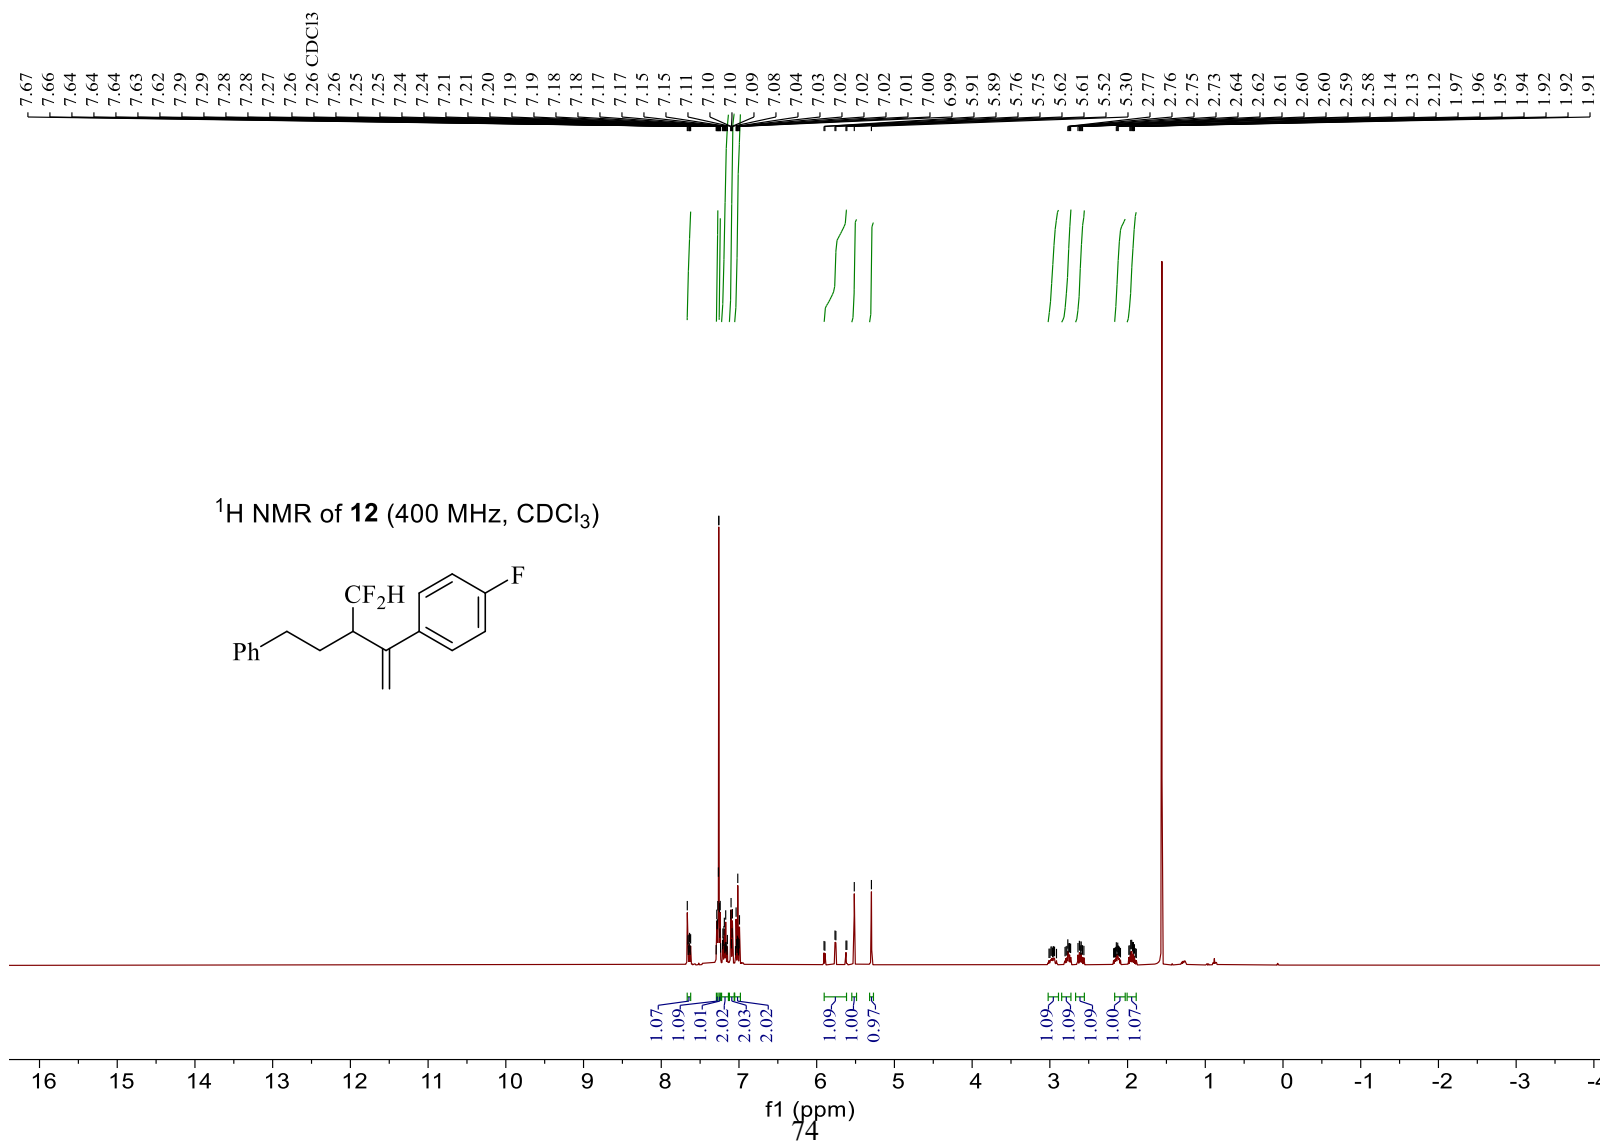

$^{13}\text{C}$  NMR of **12** (101 MHz,  $\text{CDCl}_3$ )

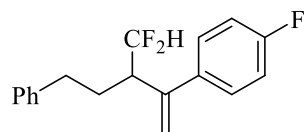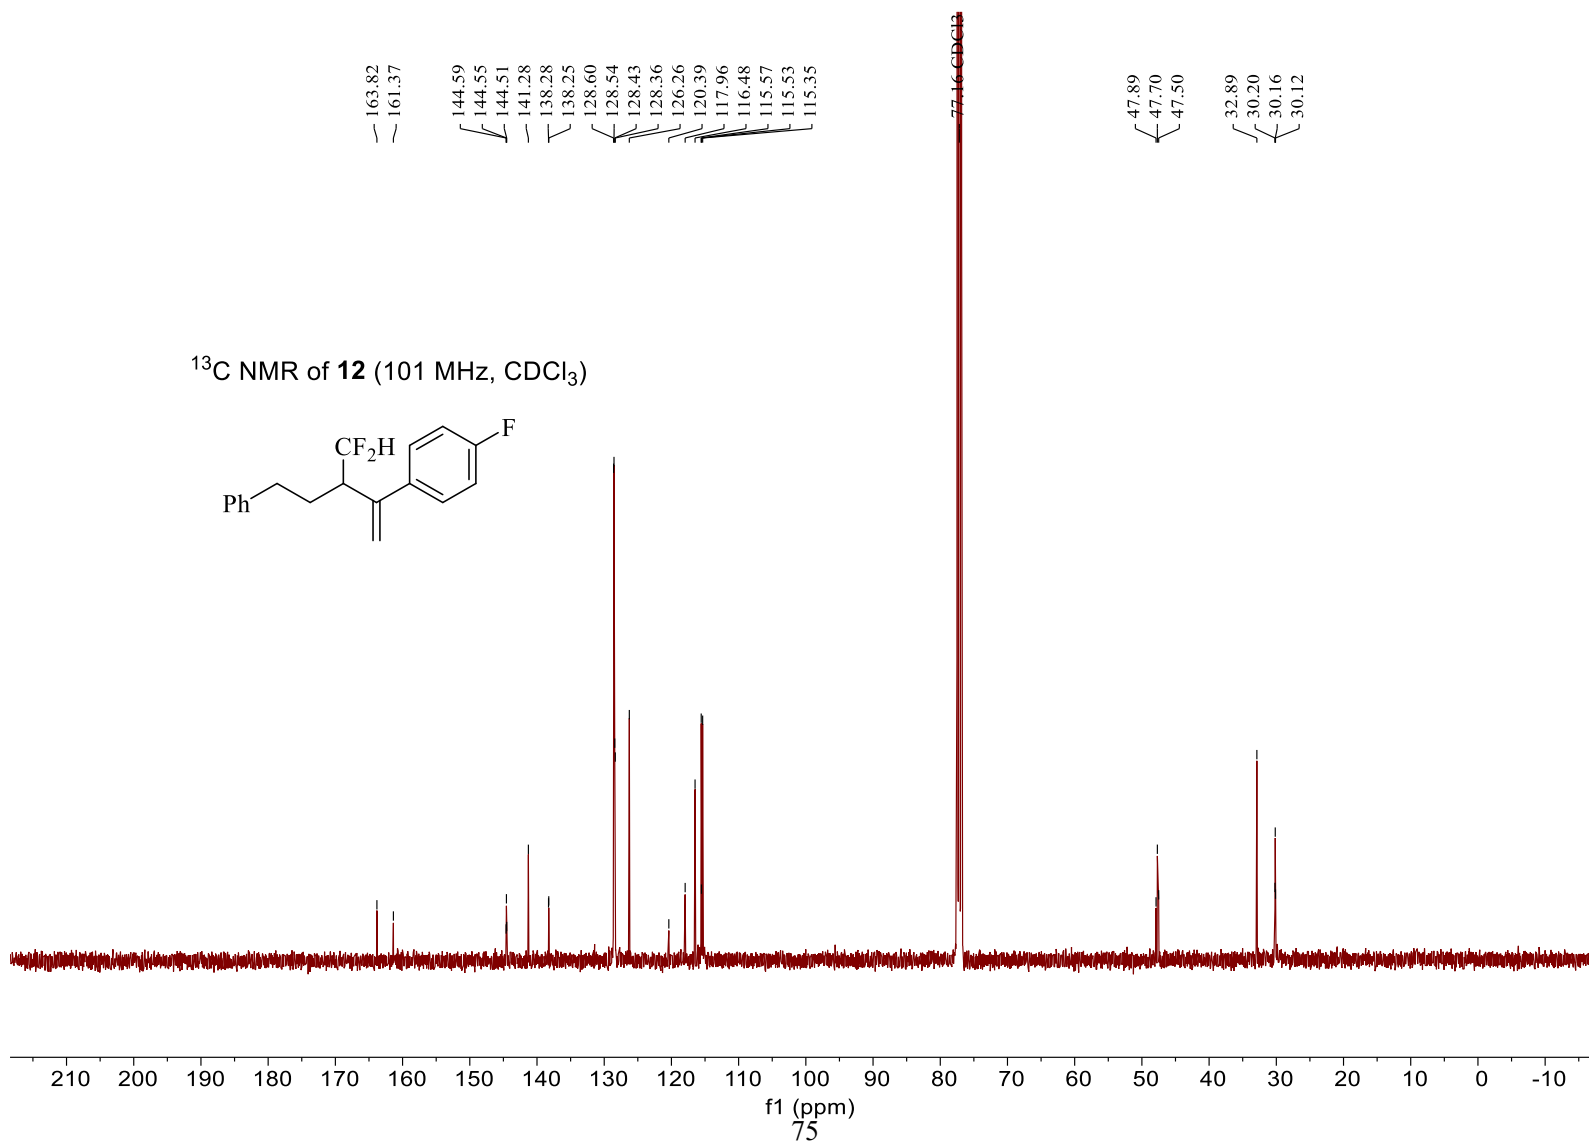

$^{19}\text{F}$  NMR of **12** (376 MHz,  $\text{CDCl}_3$ )

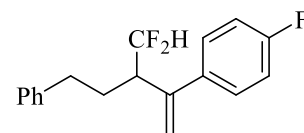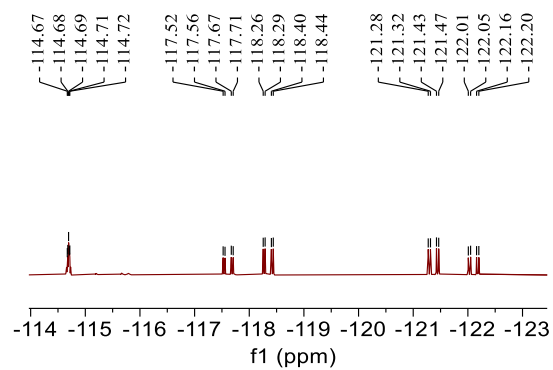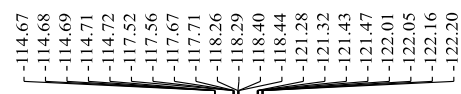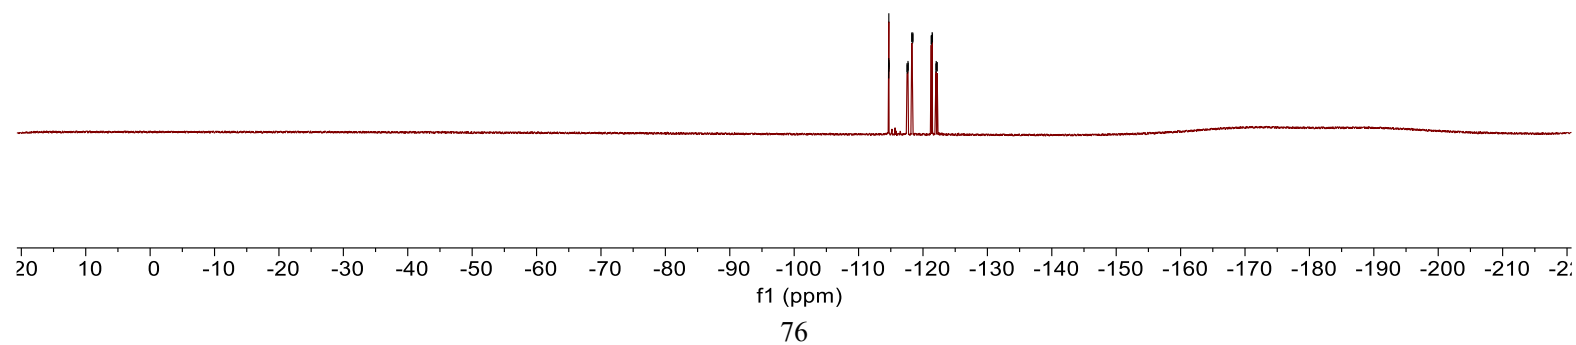



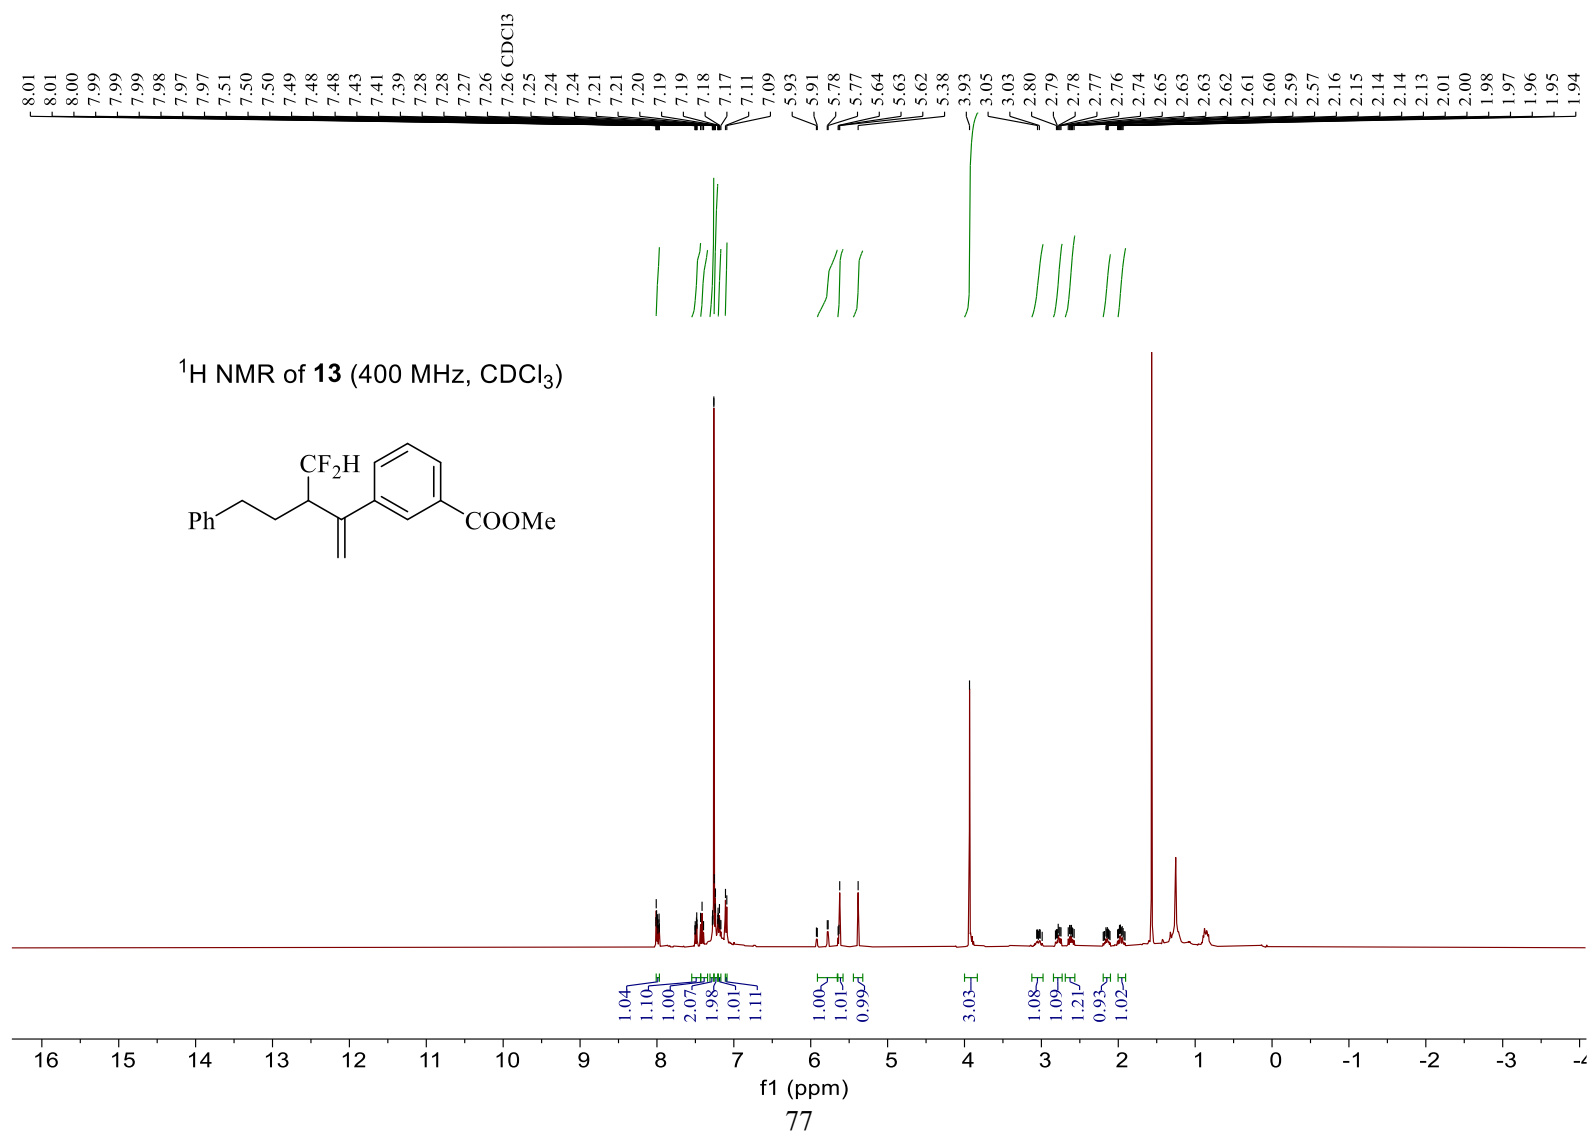

<sup>13</sup>C NMR of **13** (101 MHz, CDCl<sub>3</sub>)

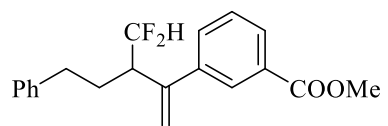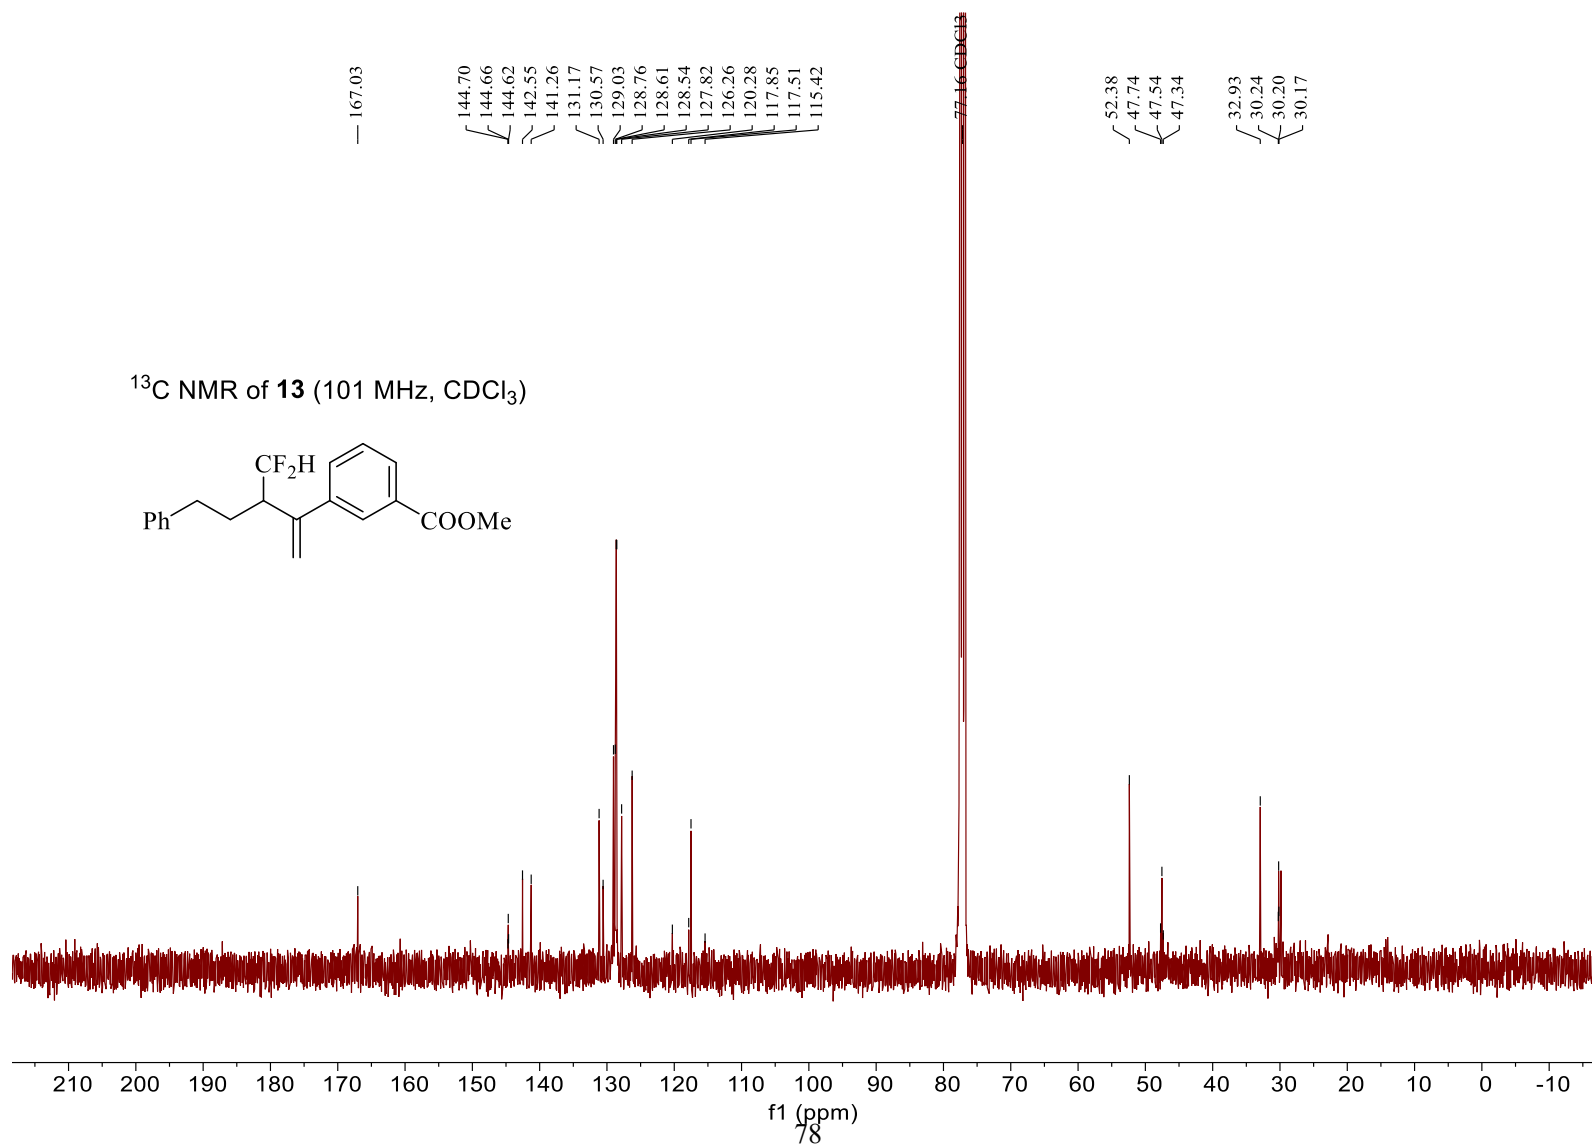

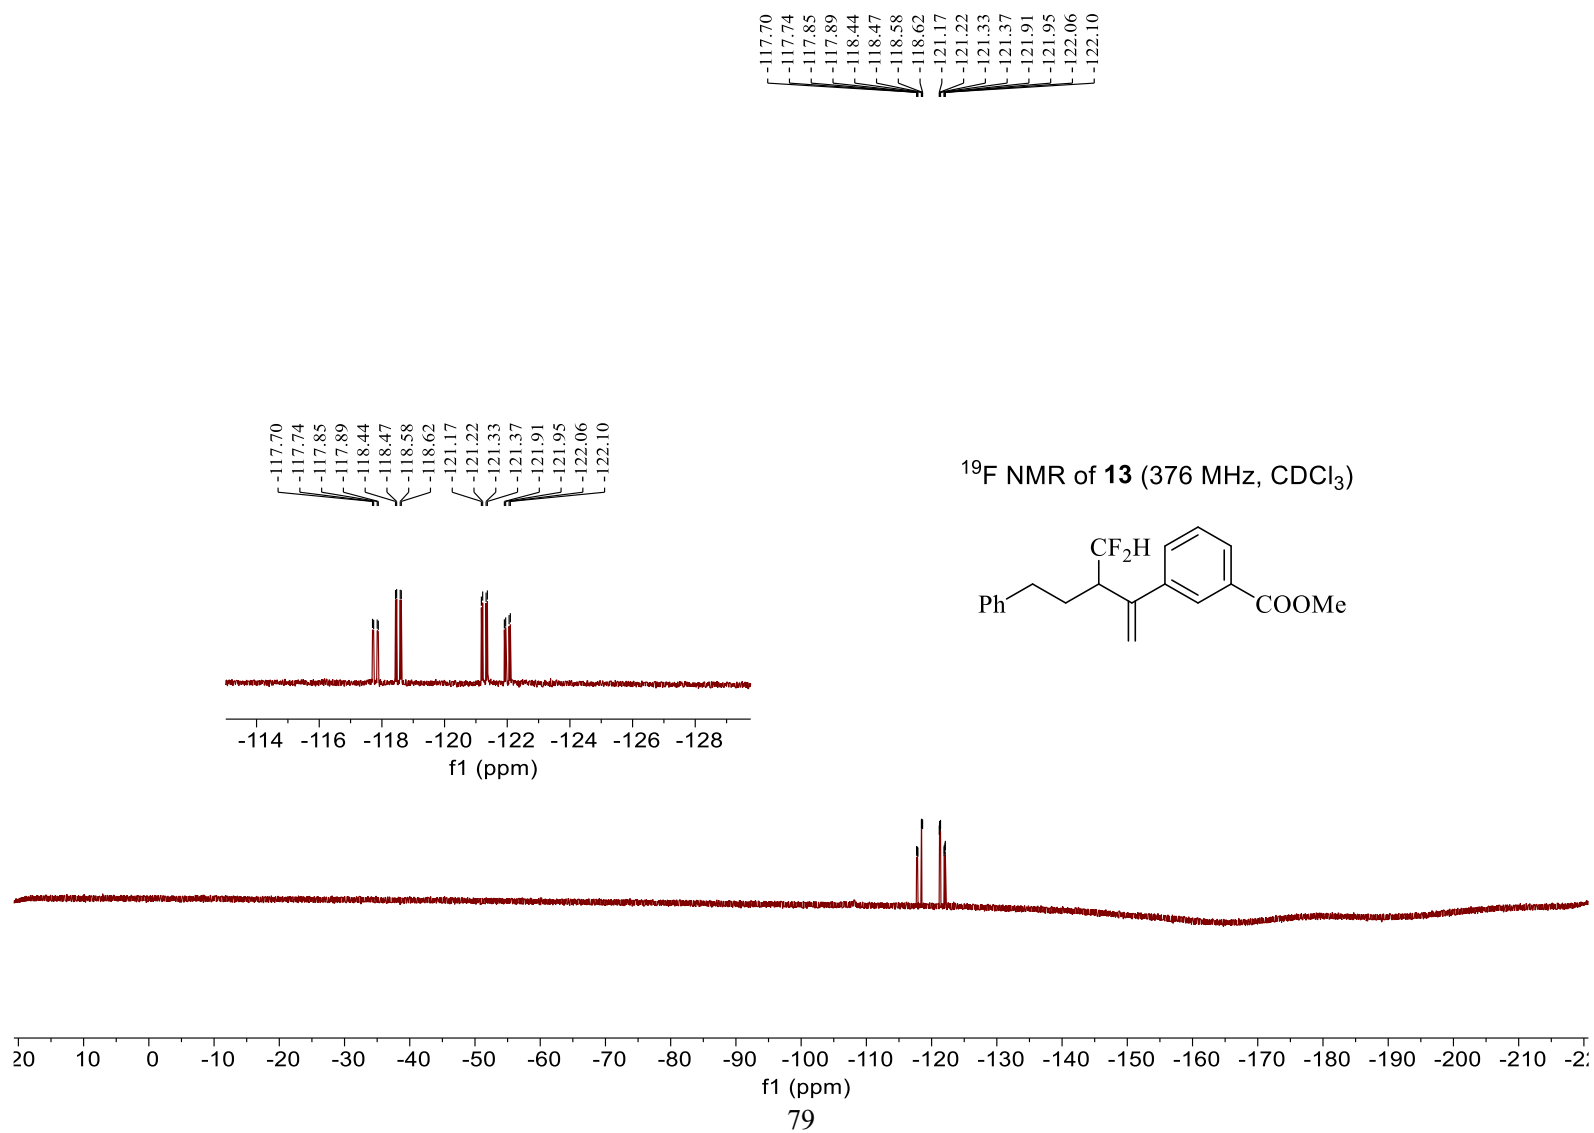

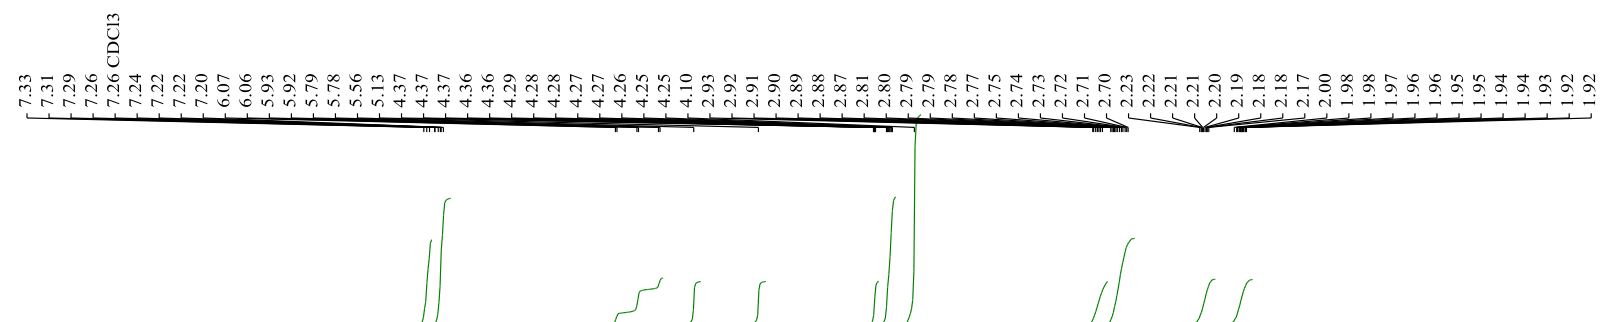

<sup>1</sup>H NMR of **14** (400 MHz, CDCl<sub>3</sub>)

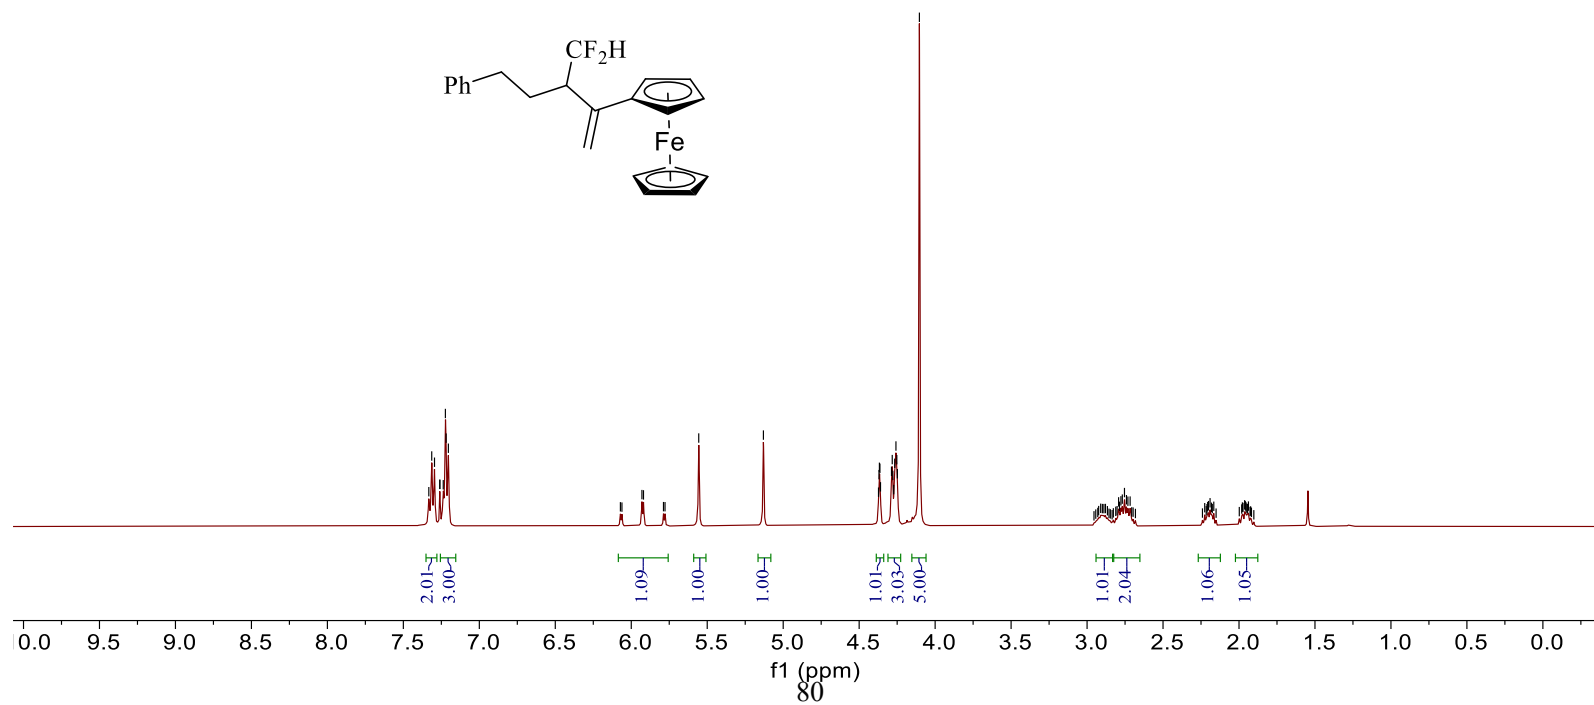

$^{13}\text{C}$  NMR of **14** (101 MHz,  $\text{CDCl}_3$ )

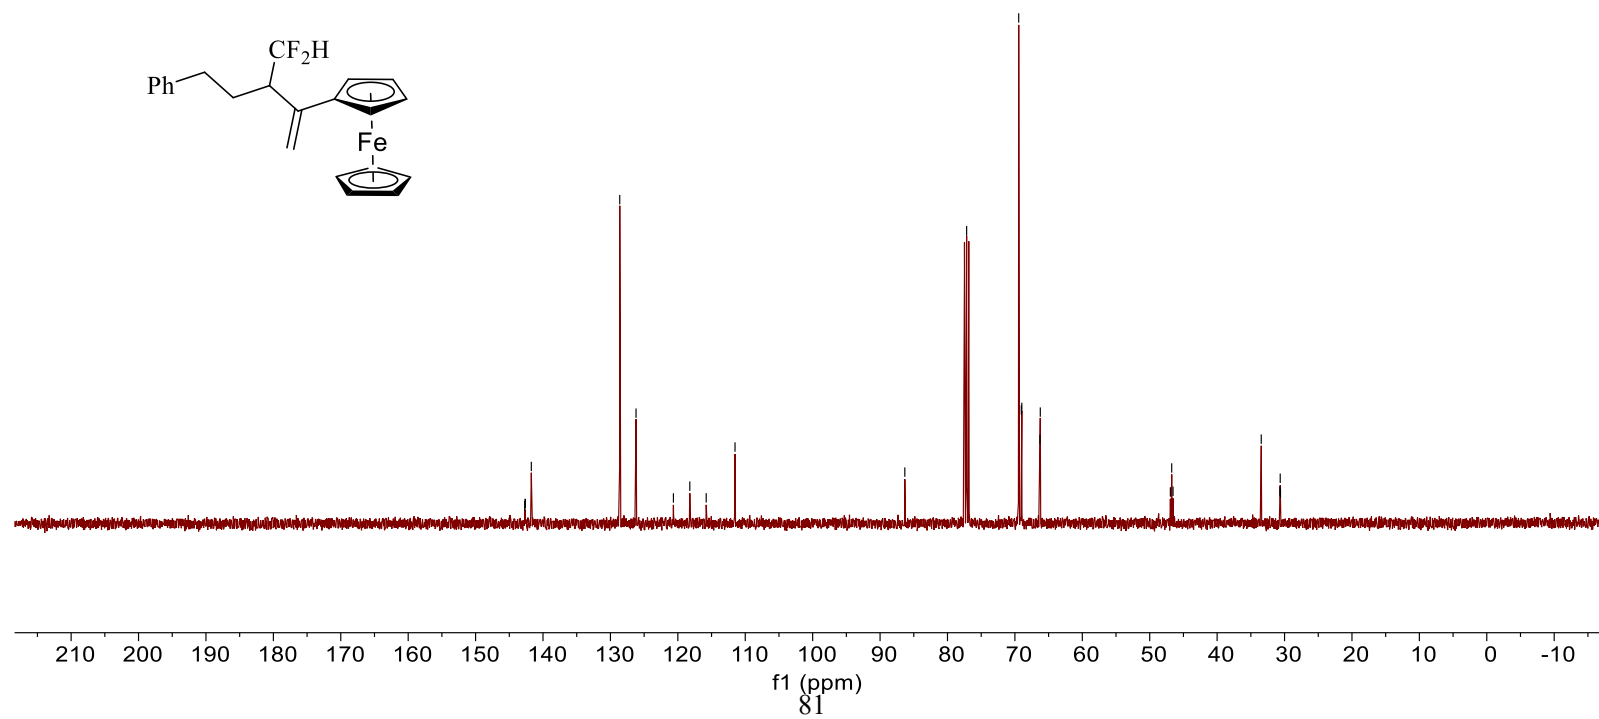

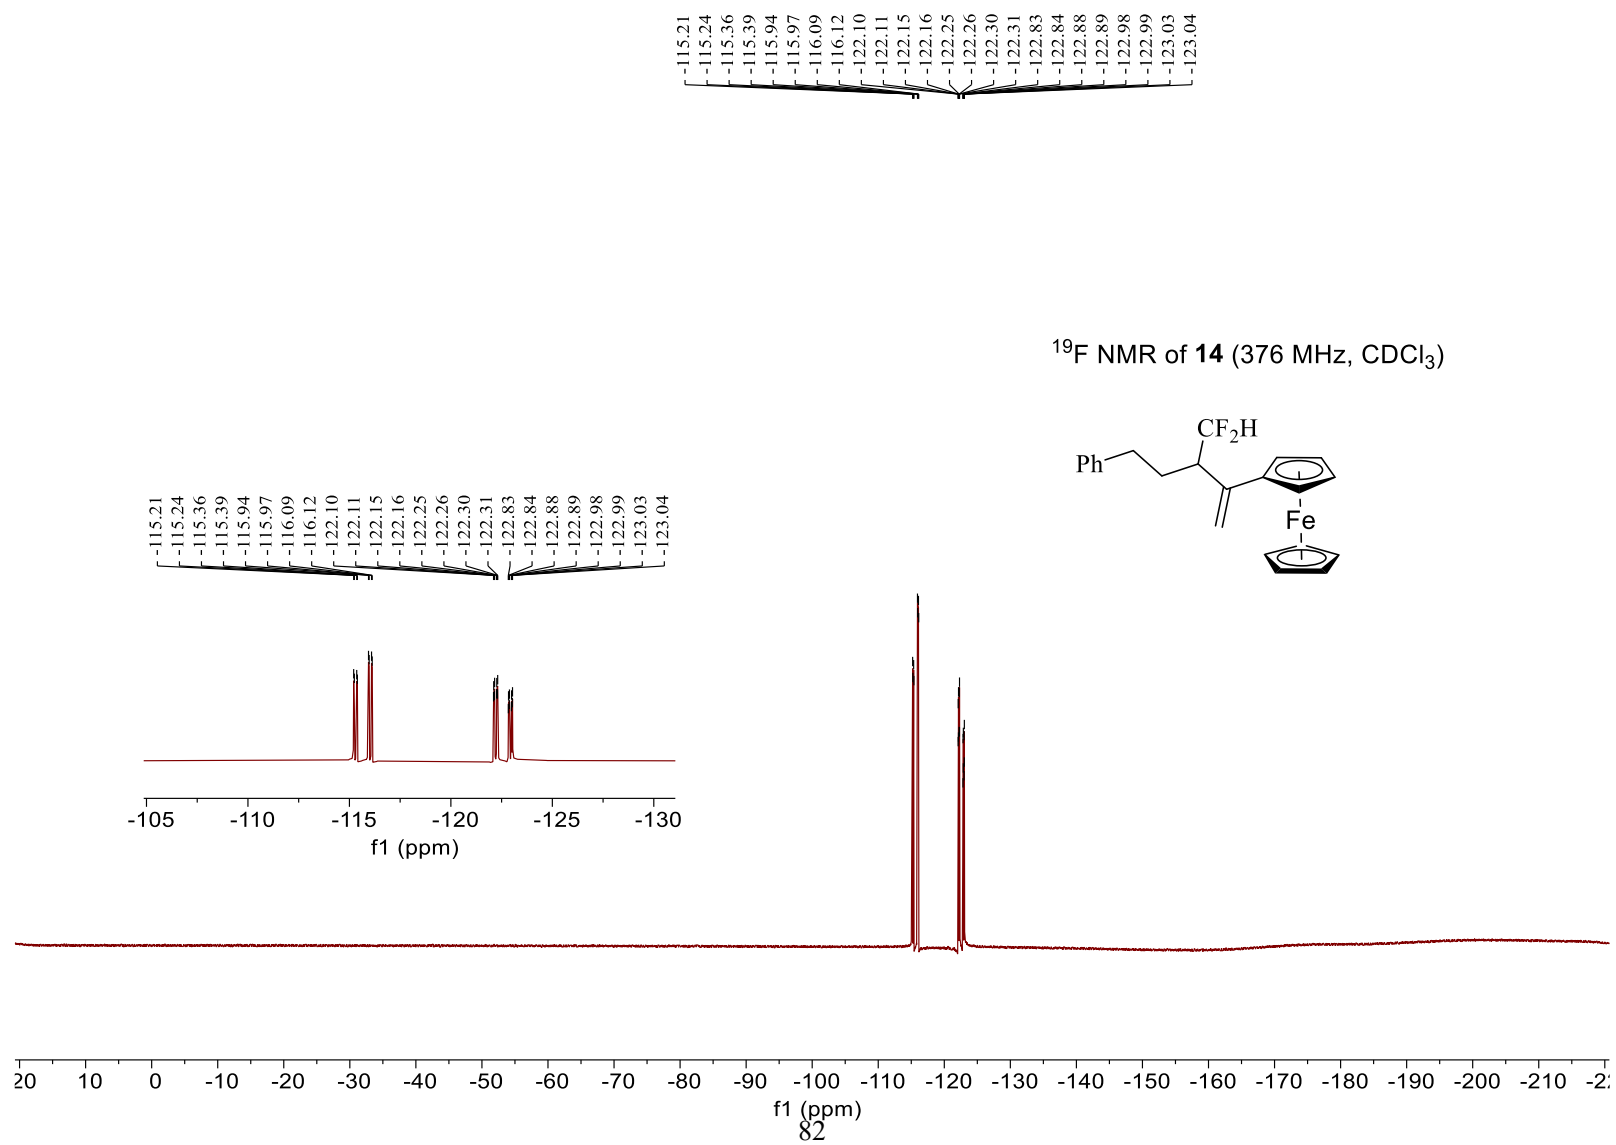

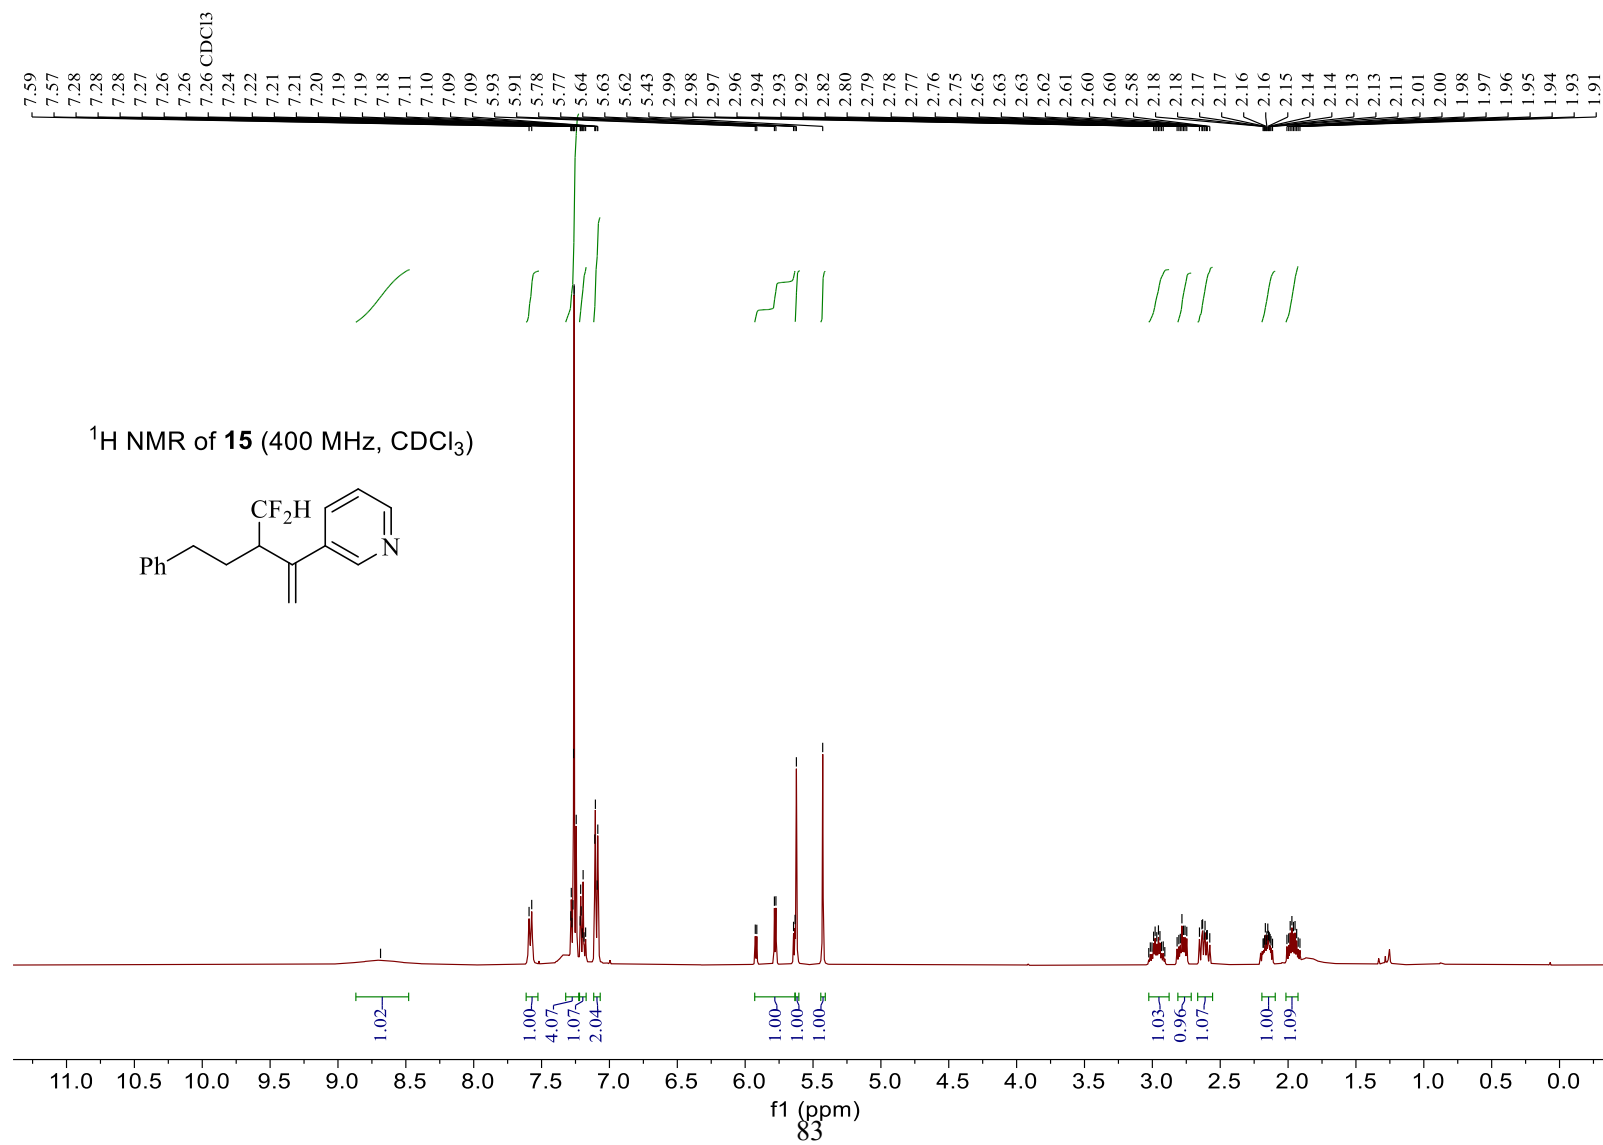

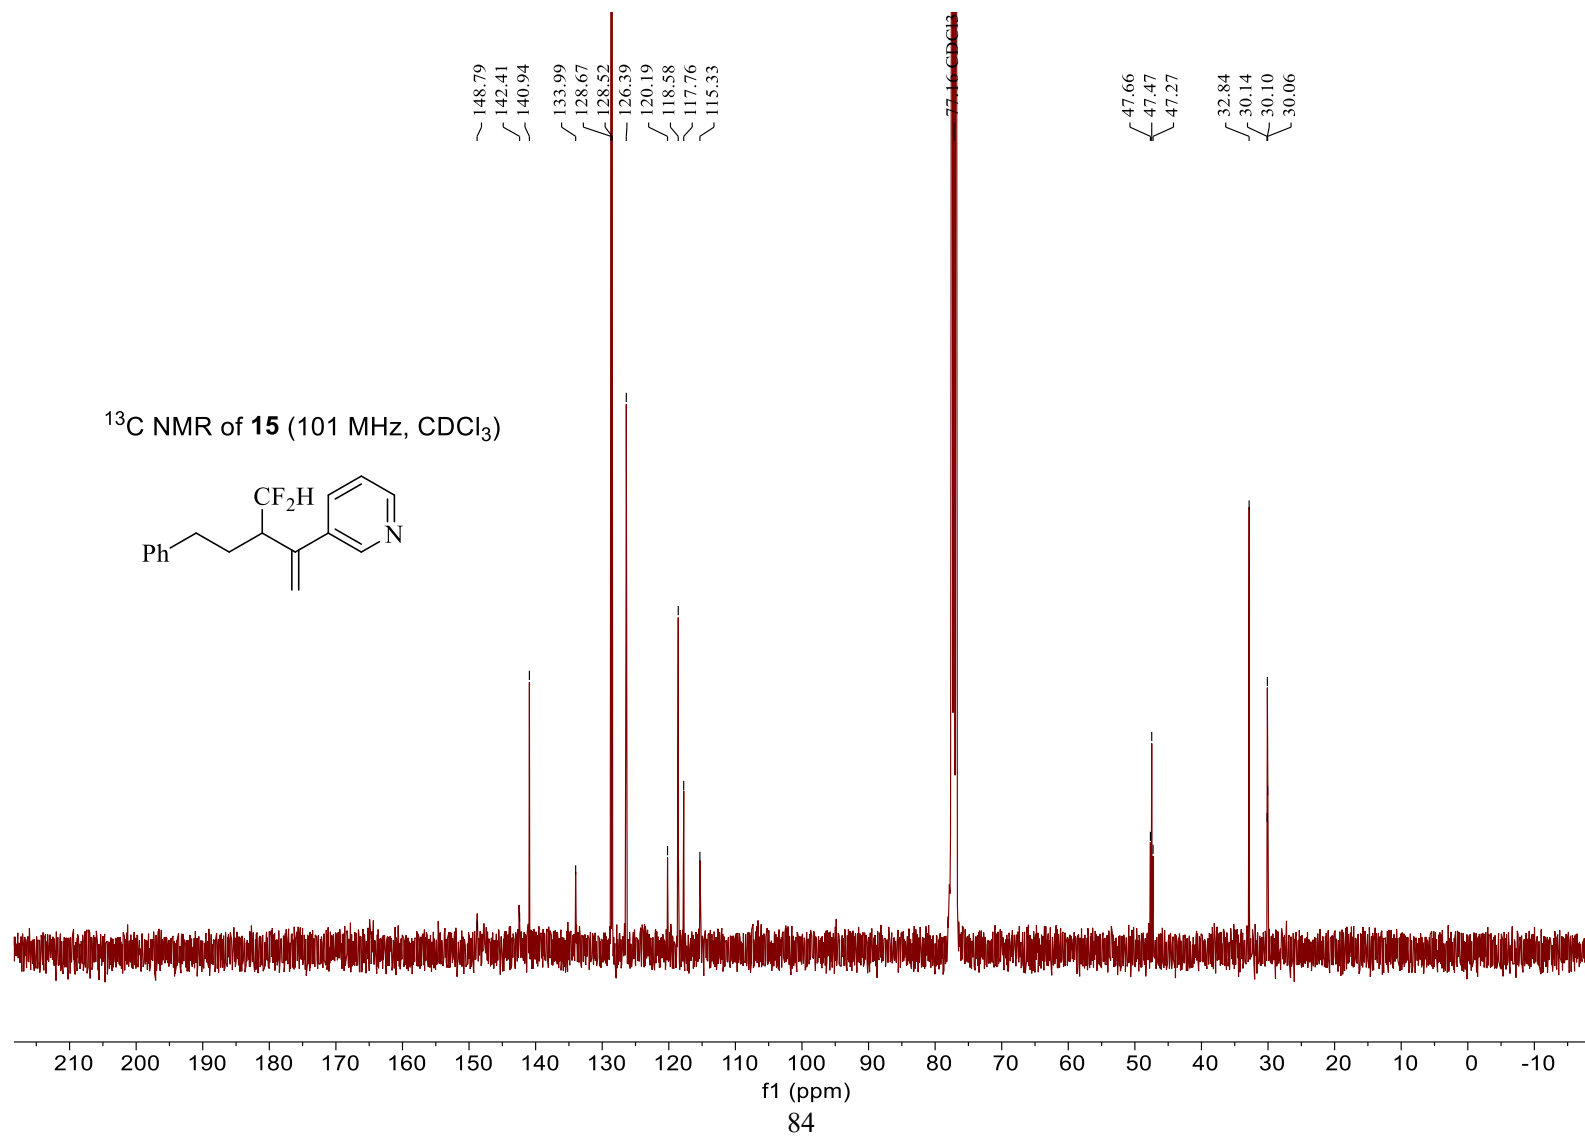



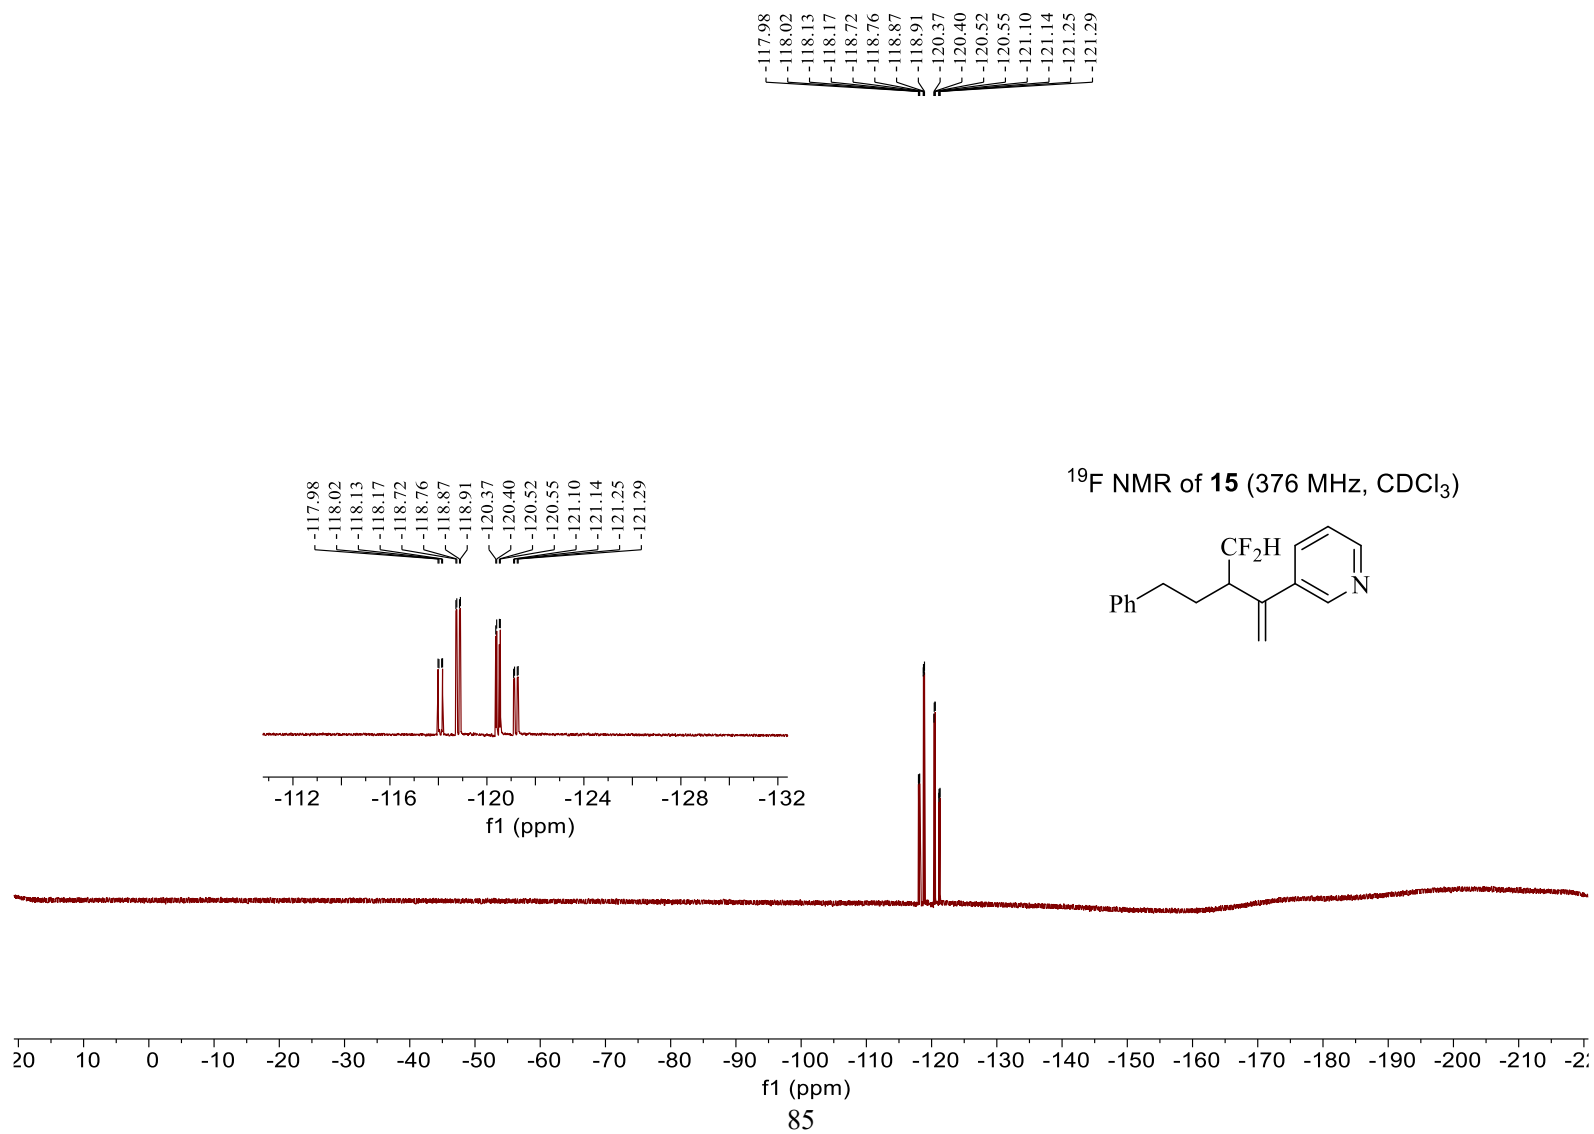

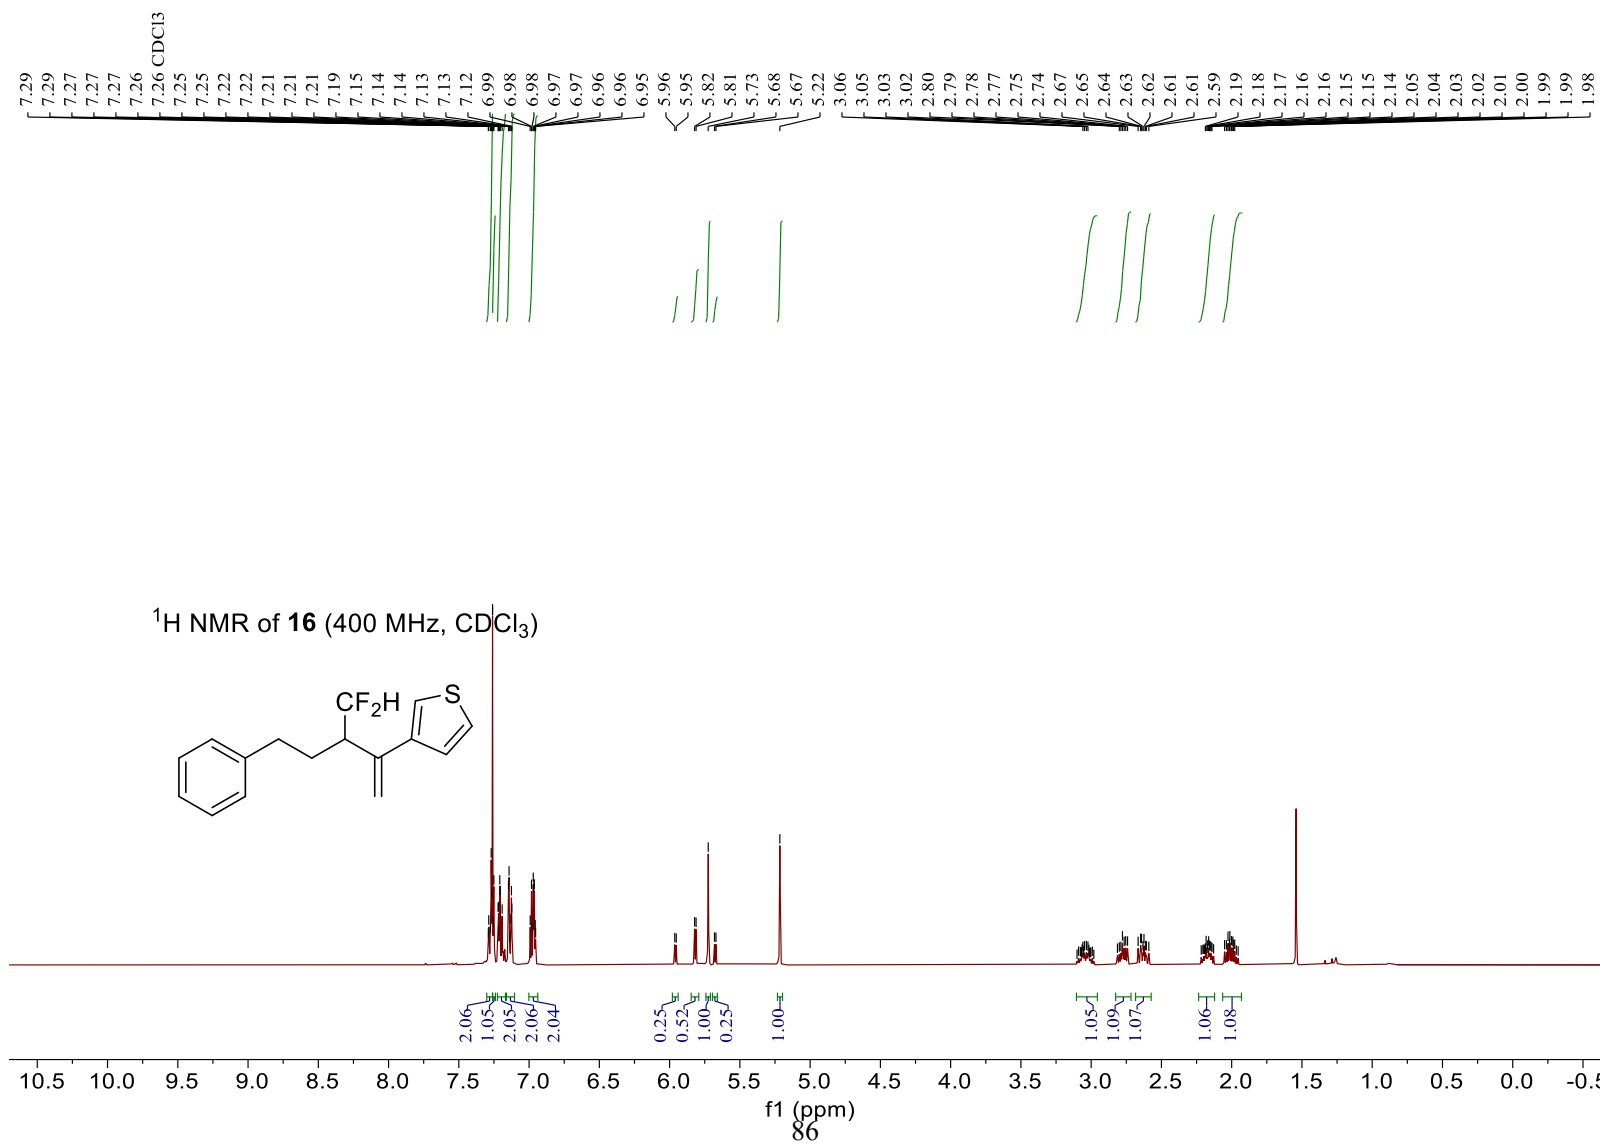

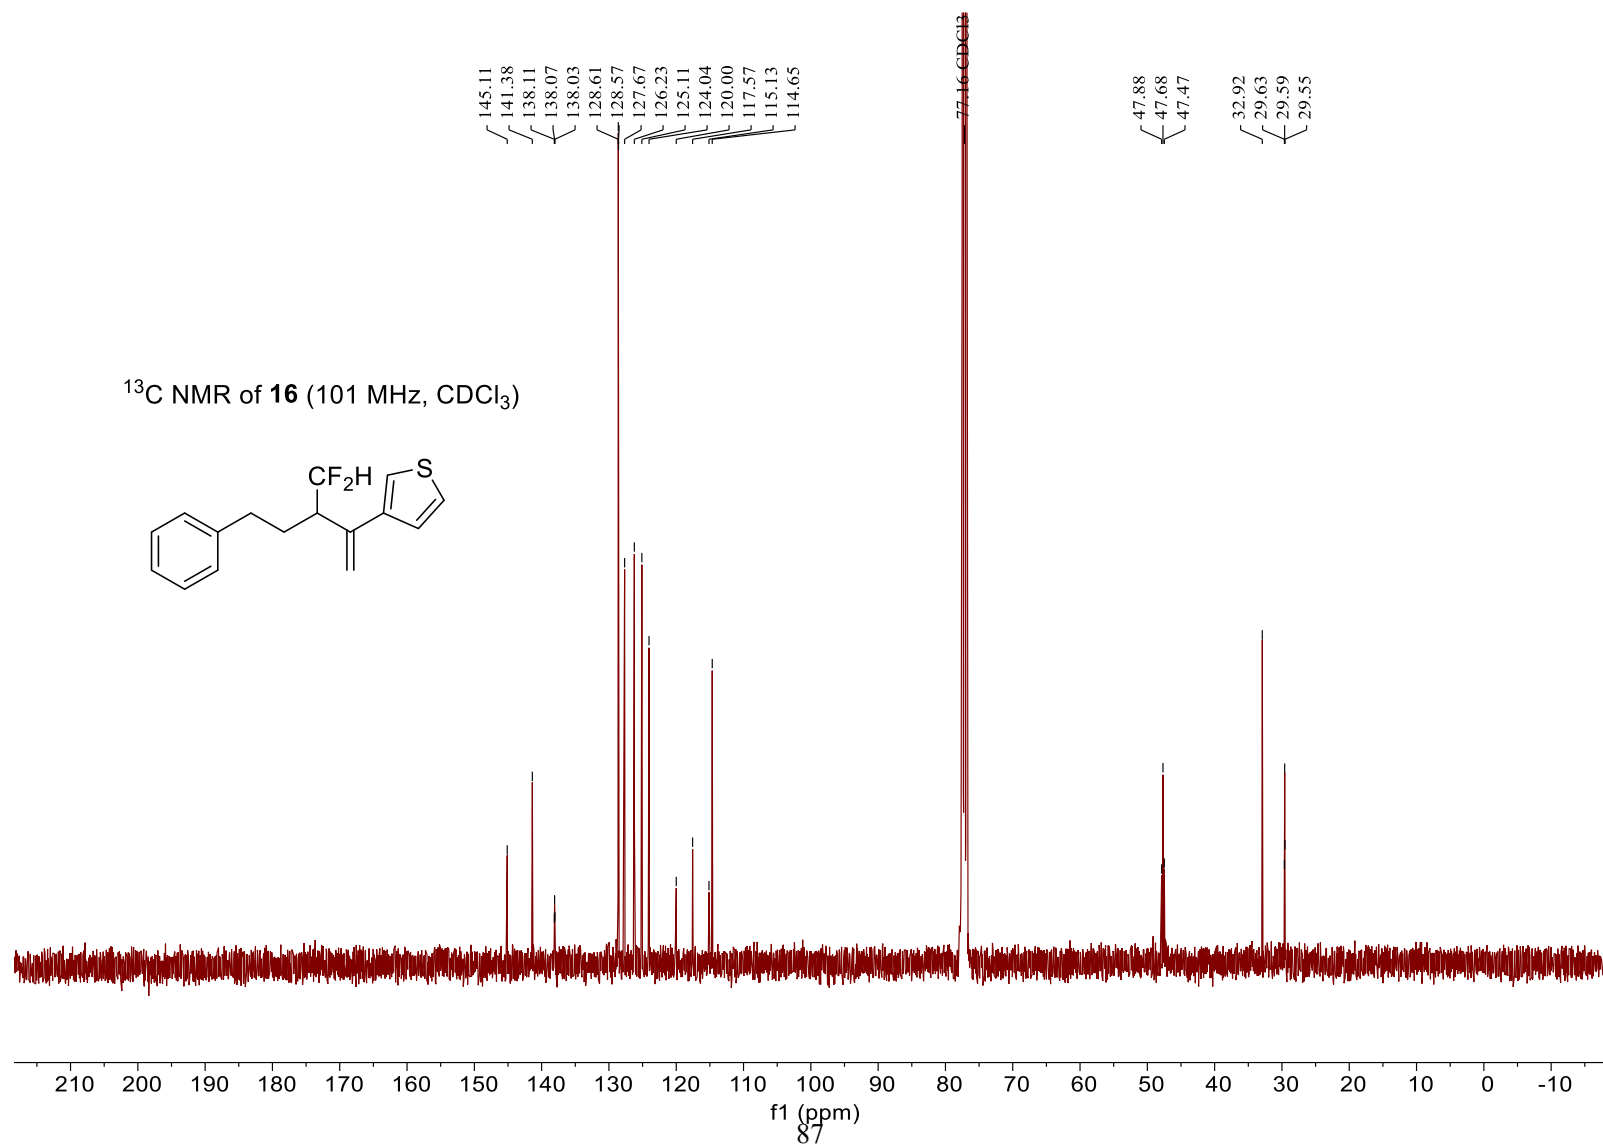

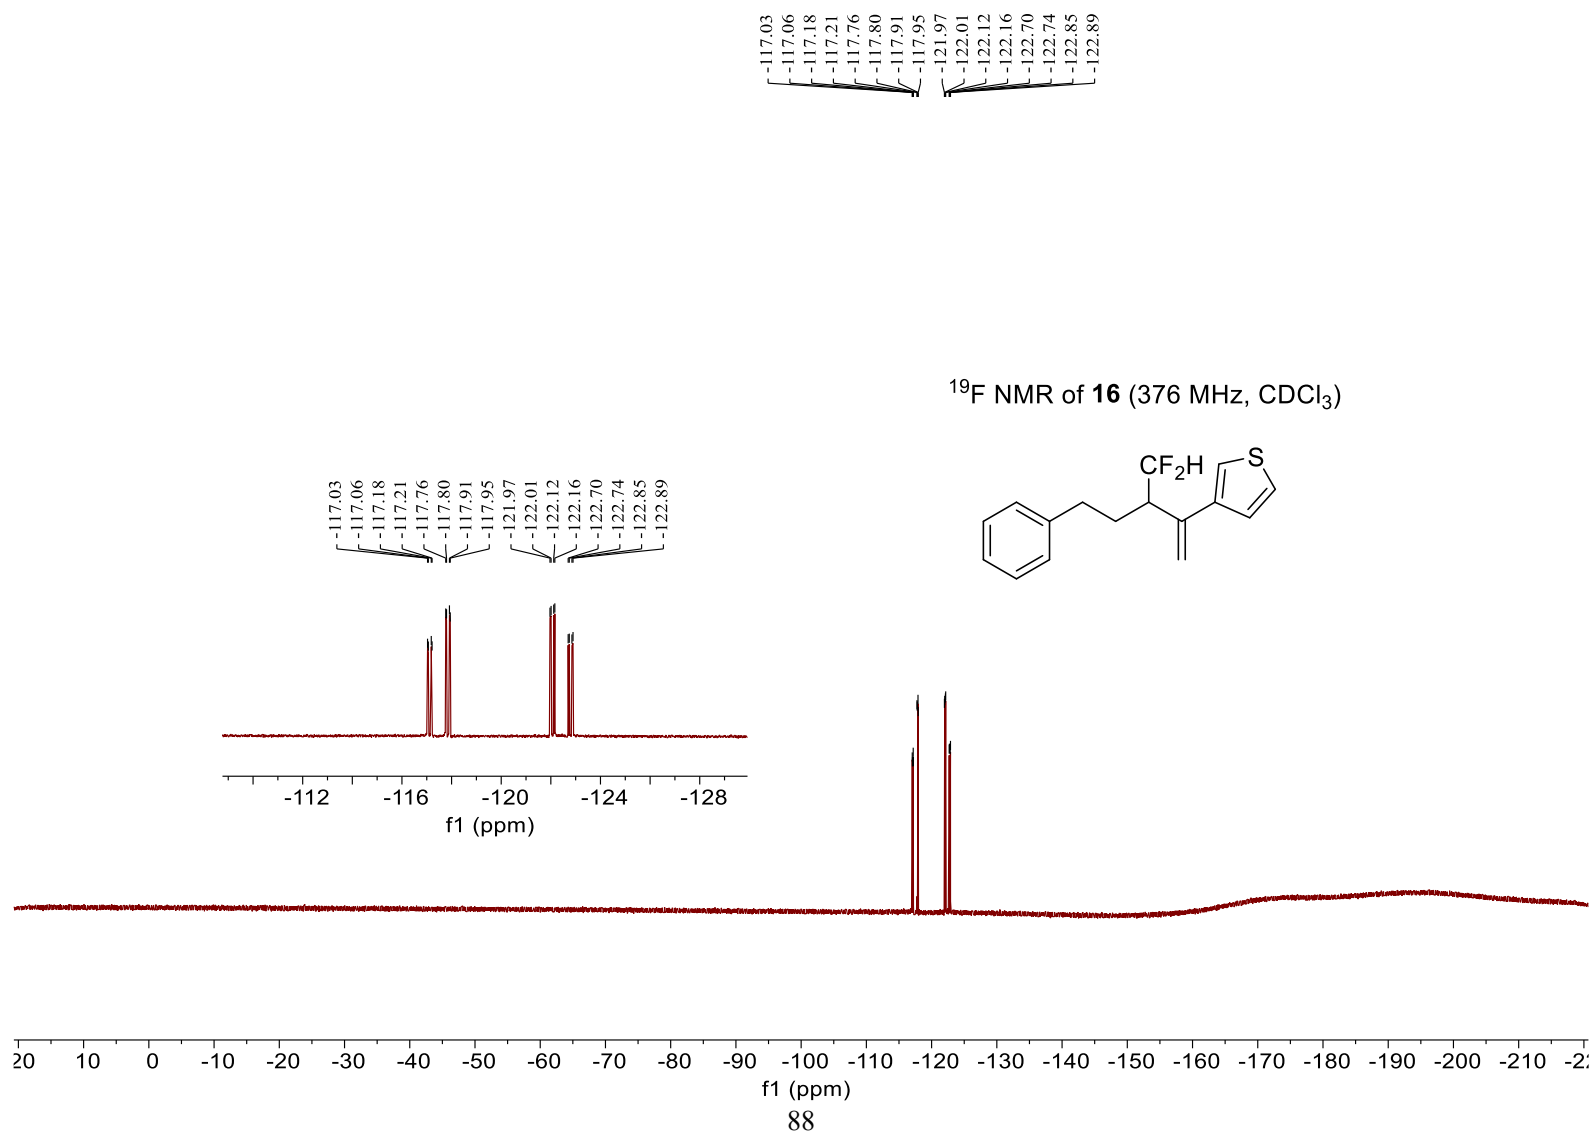

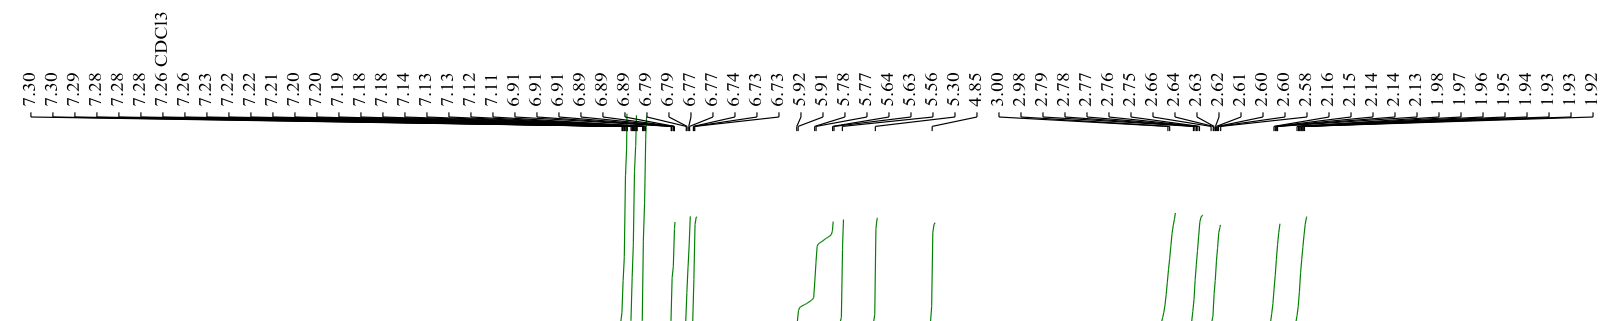

<sup>1</sup>H NMR of **17** (400 MHz, CDCl<sub>3</sub>)

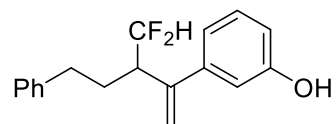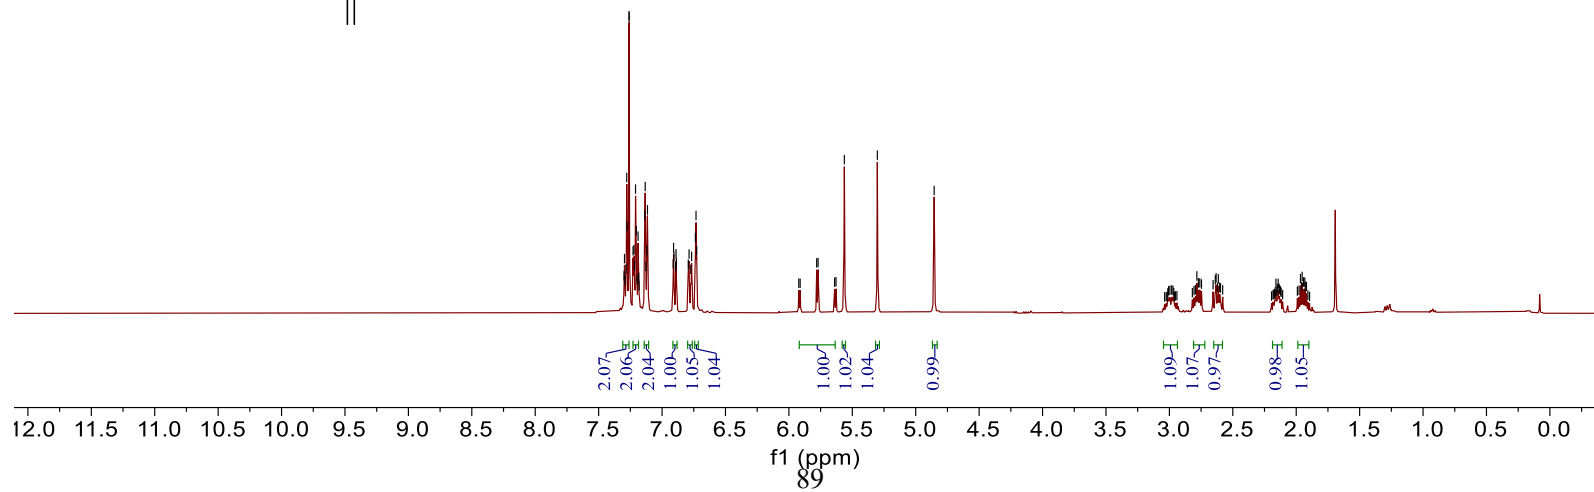

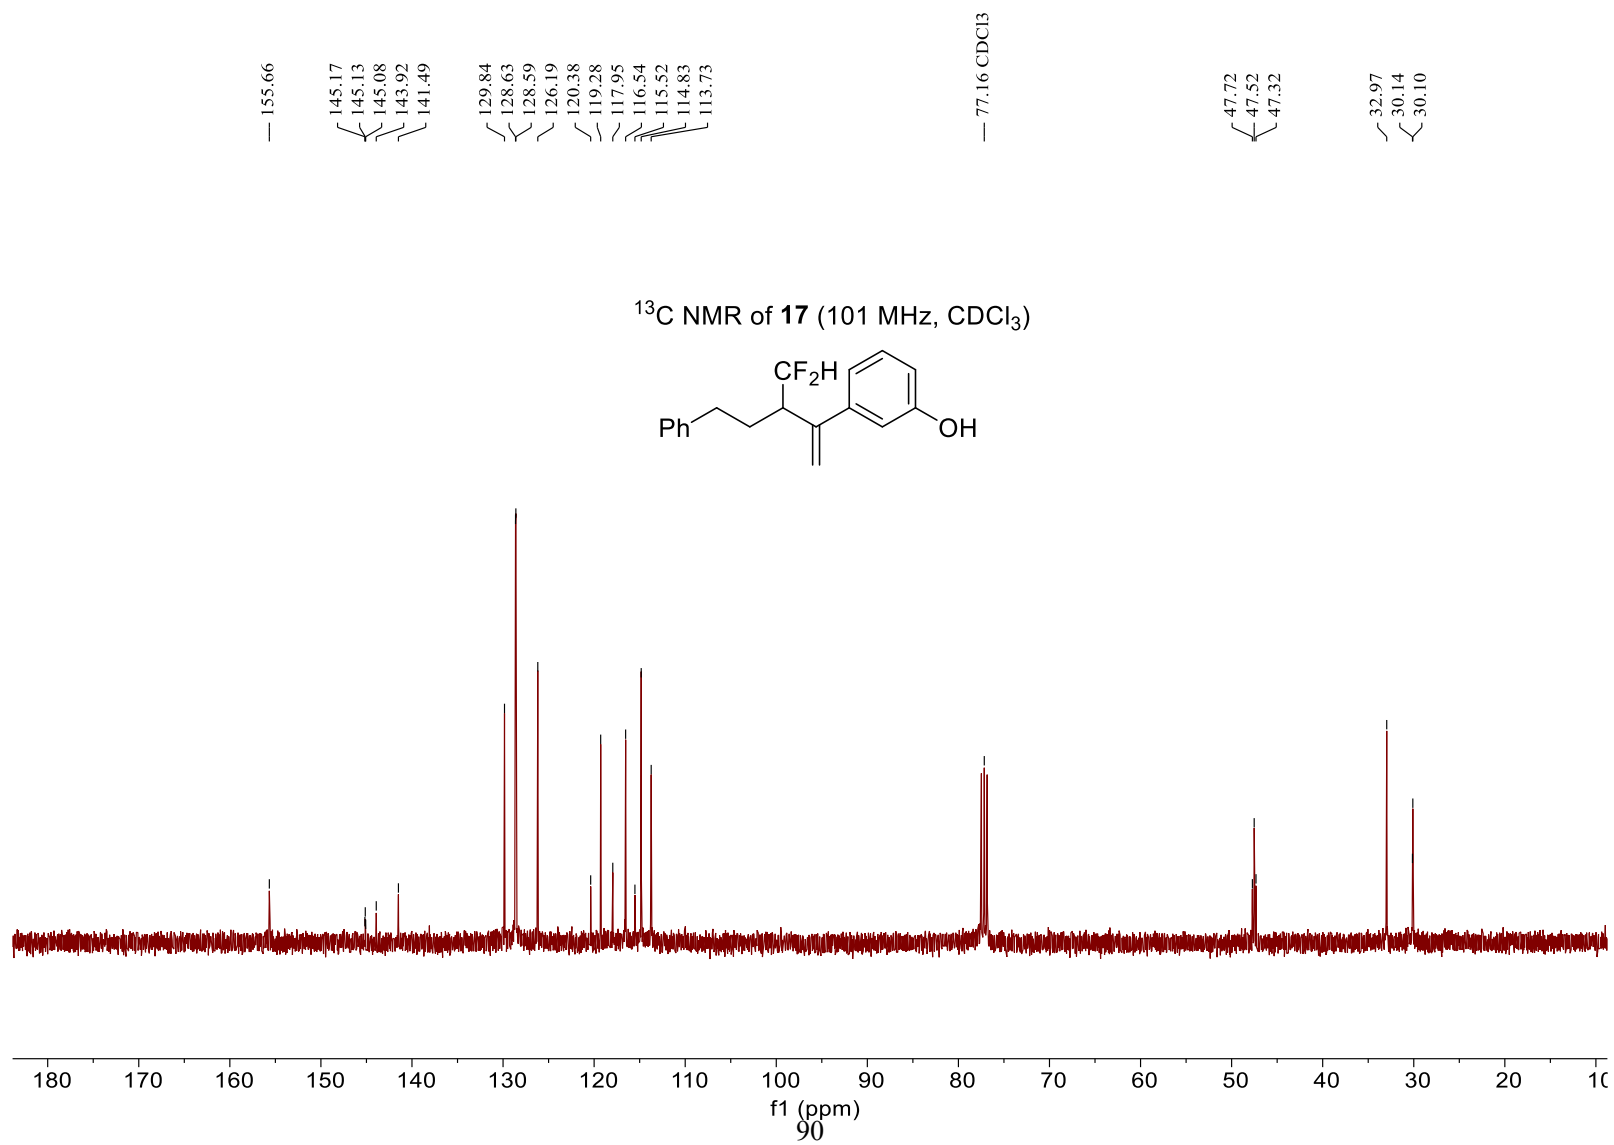

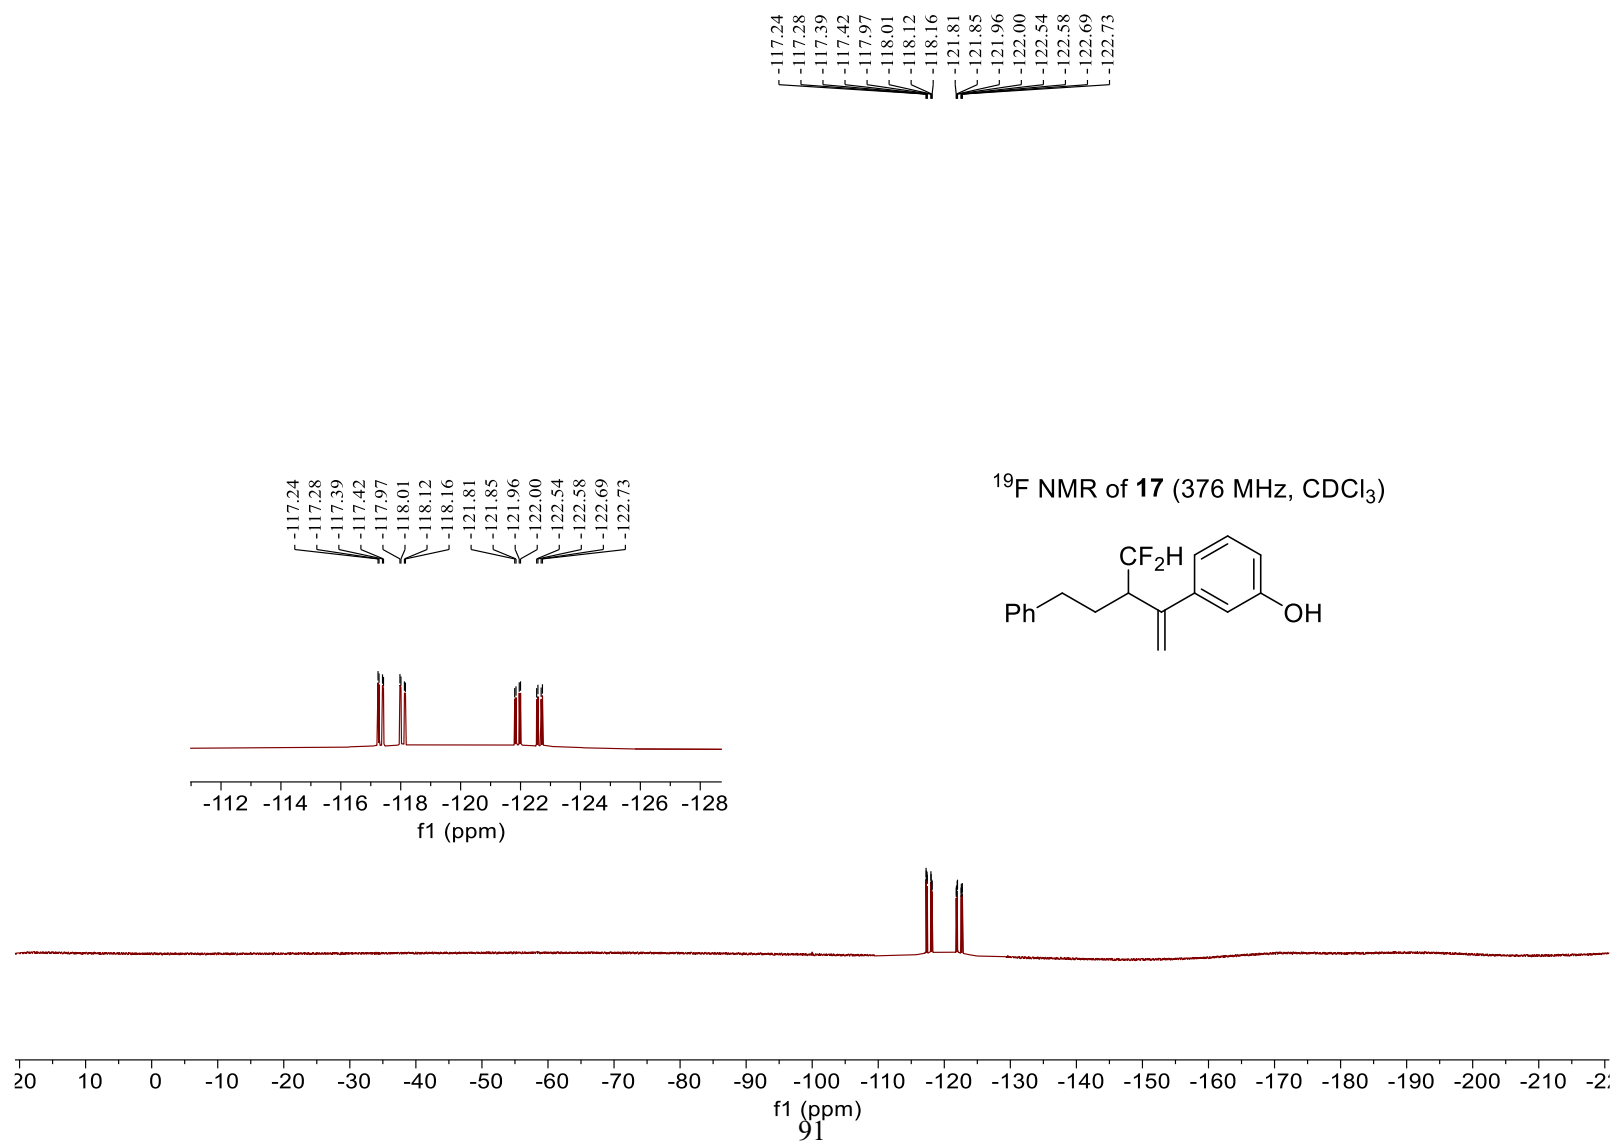

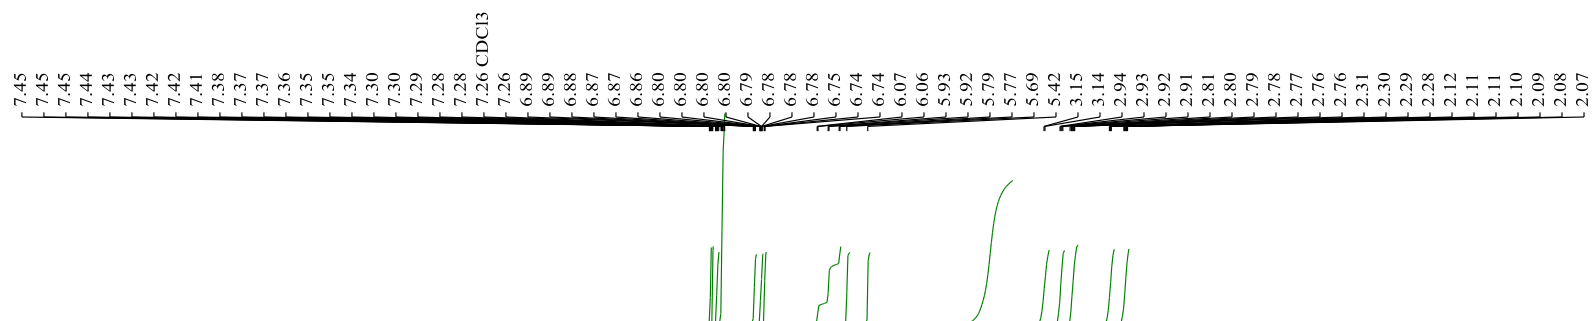

<sup>1</sup>H NMR of **18** (400 MHz, CDCl<sub>3</sub>)

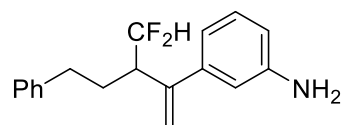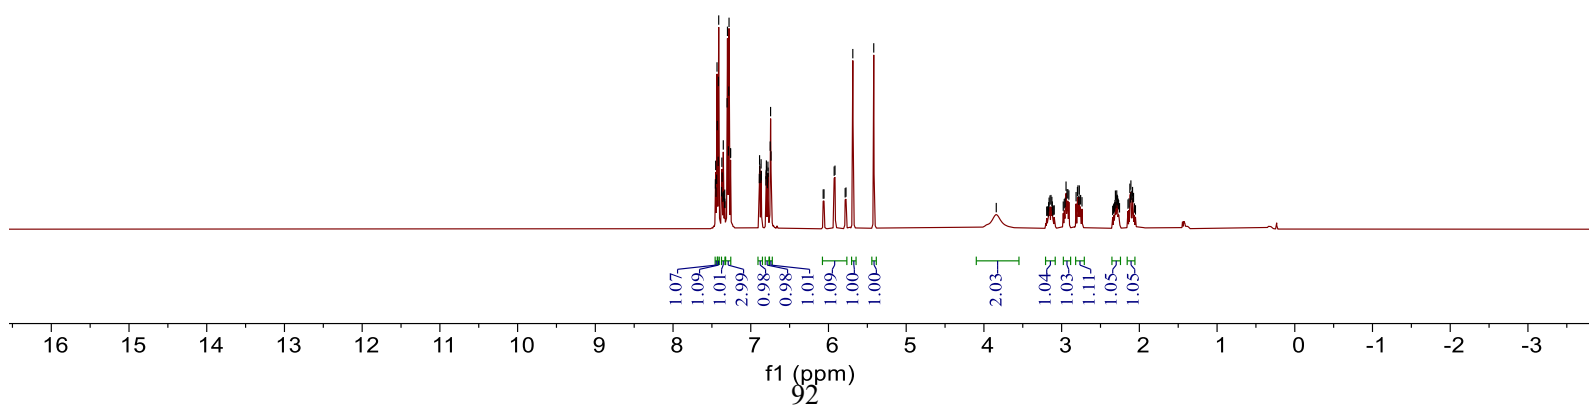



<sup>13</sup>C NMR of **18** (101 MHz, CDCl<sub>3</sub>)

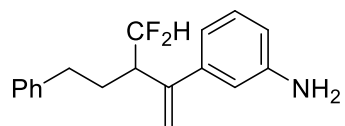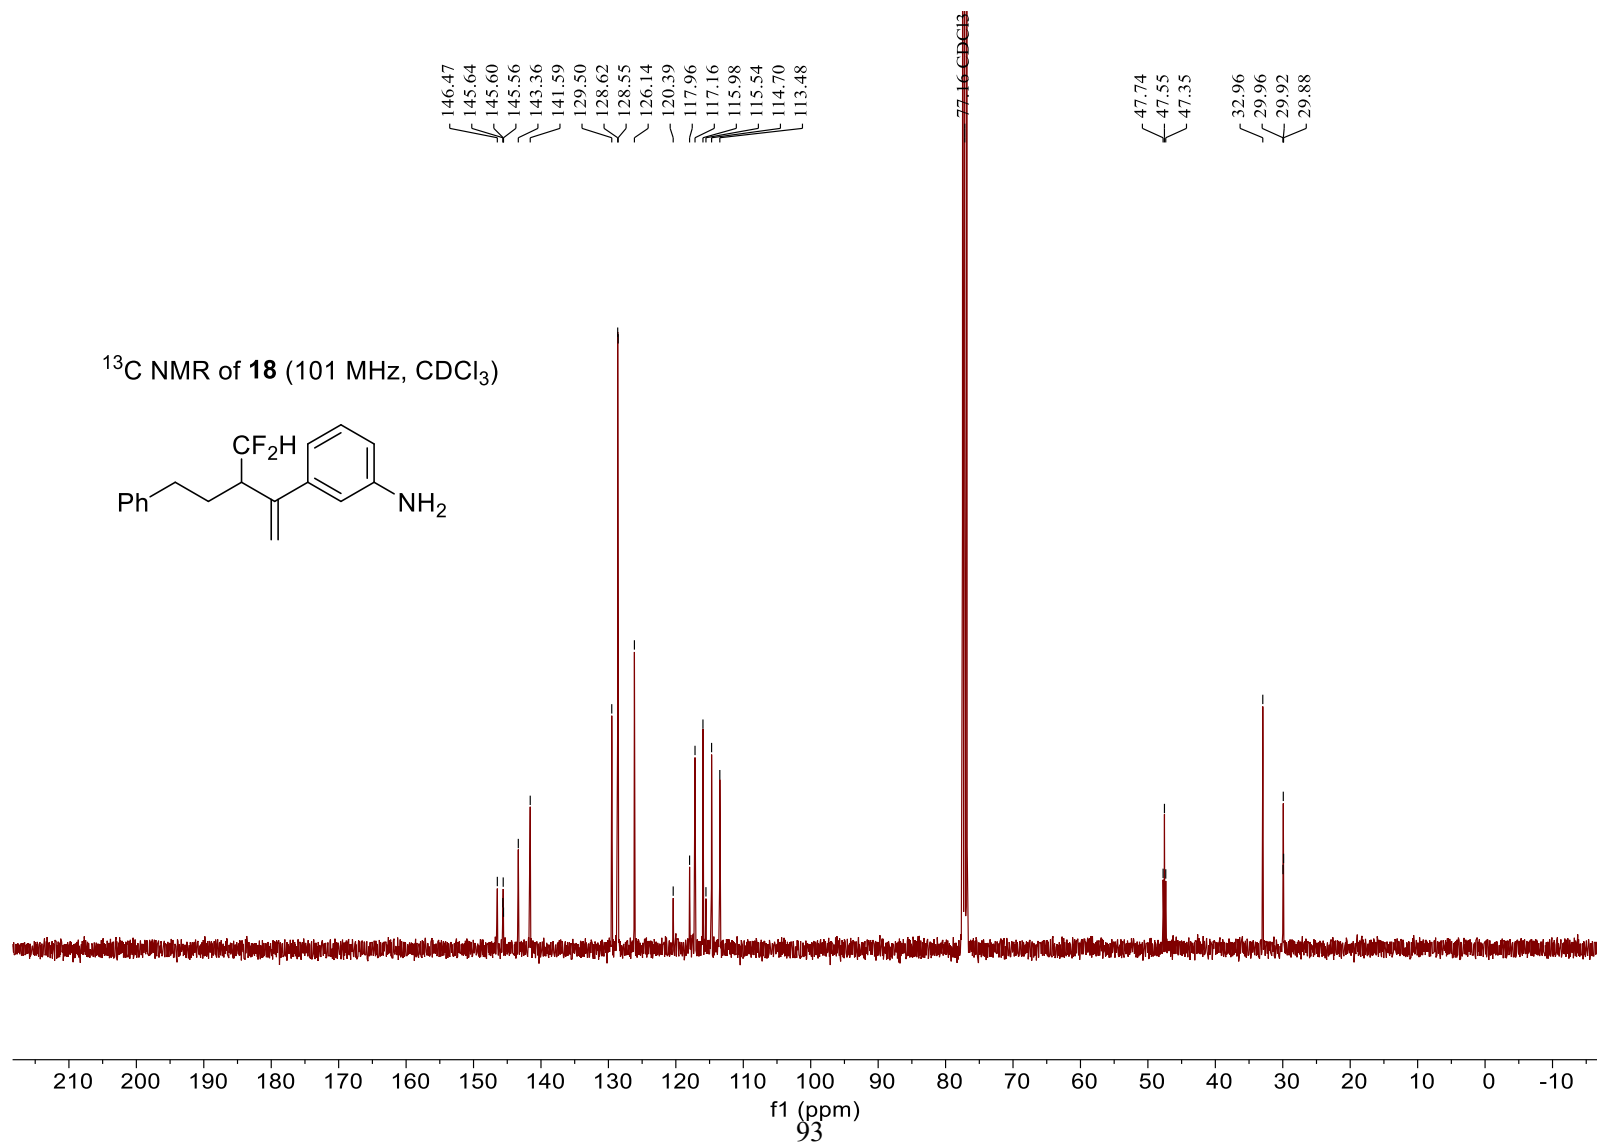

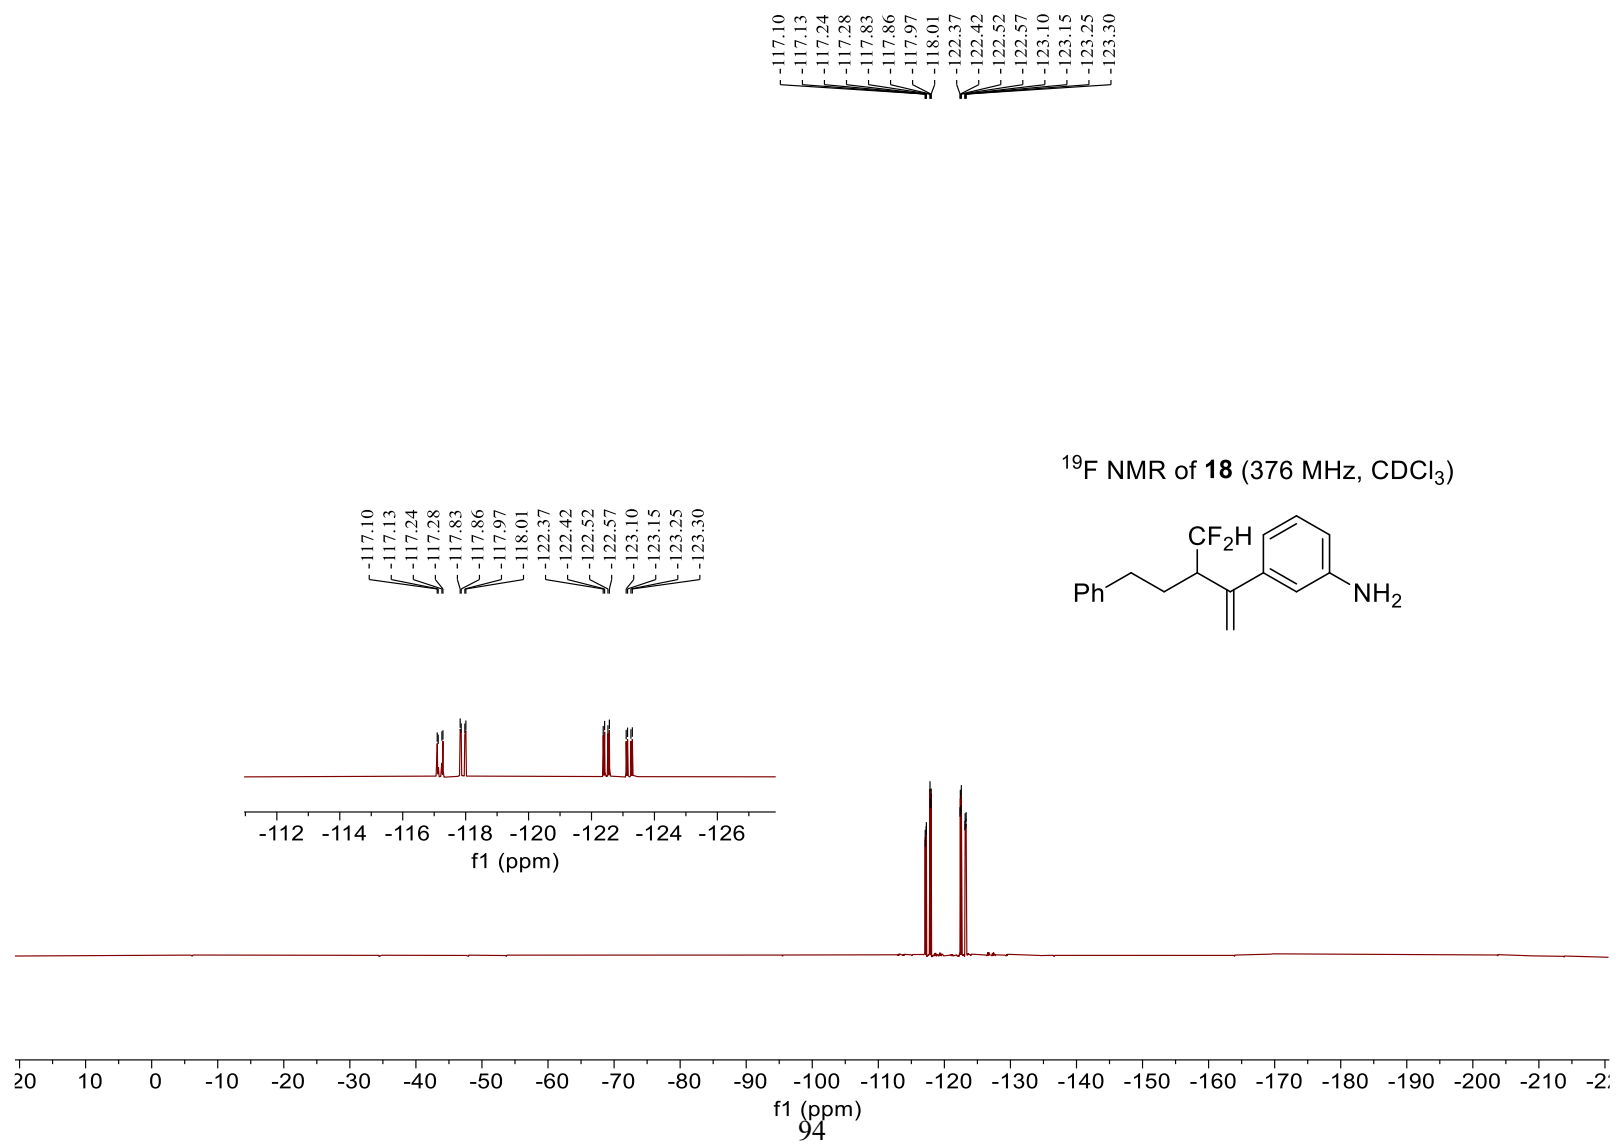

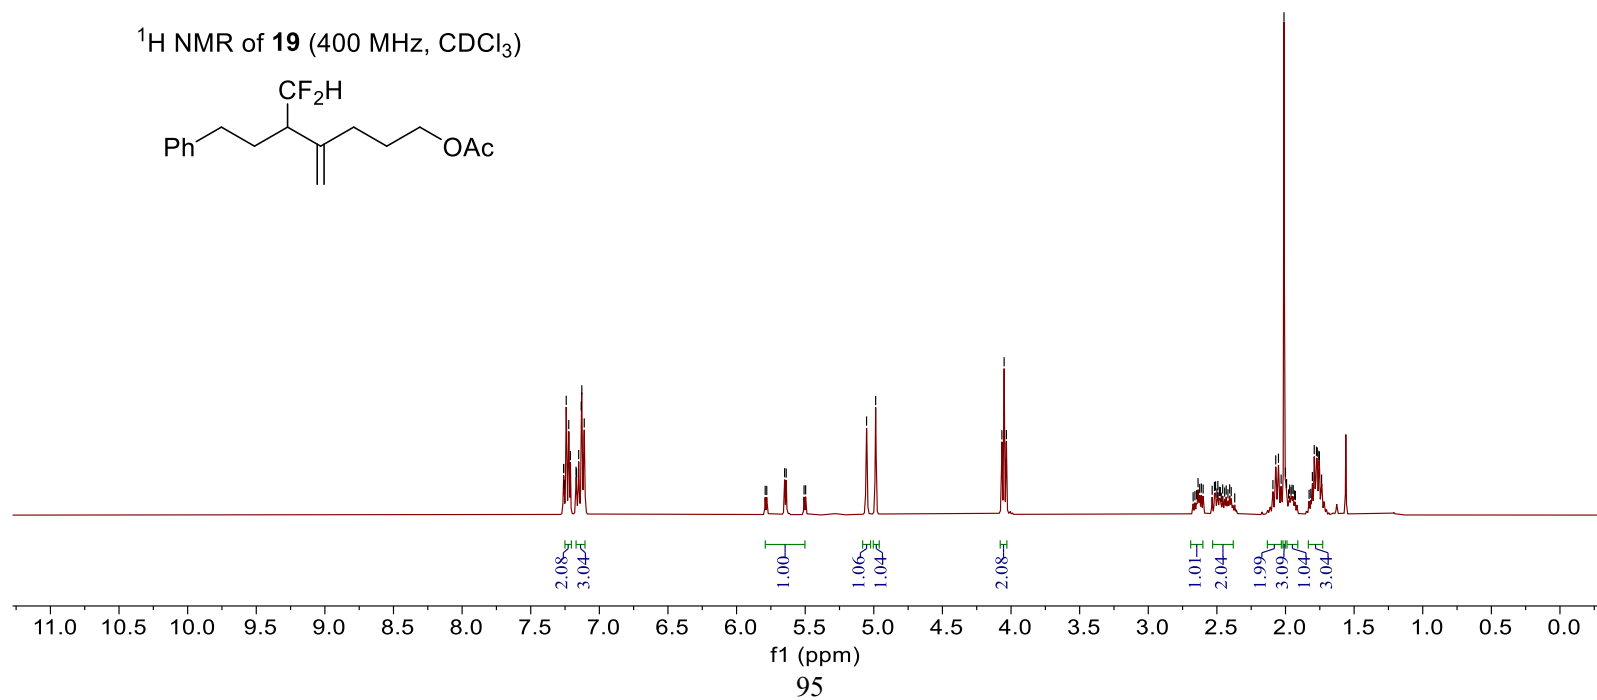

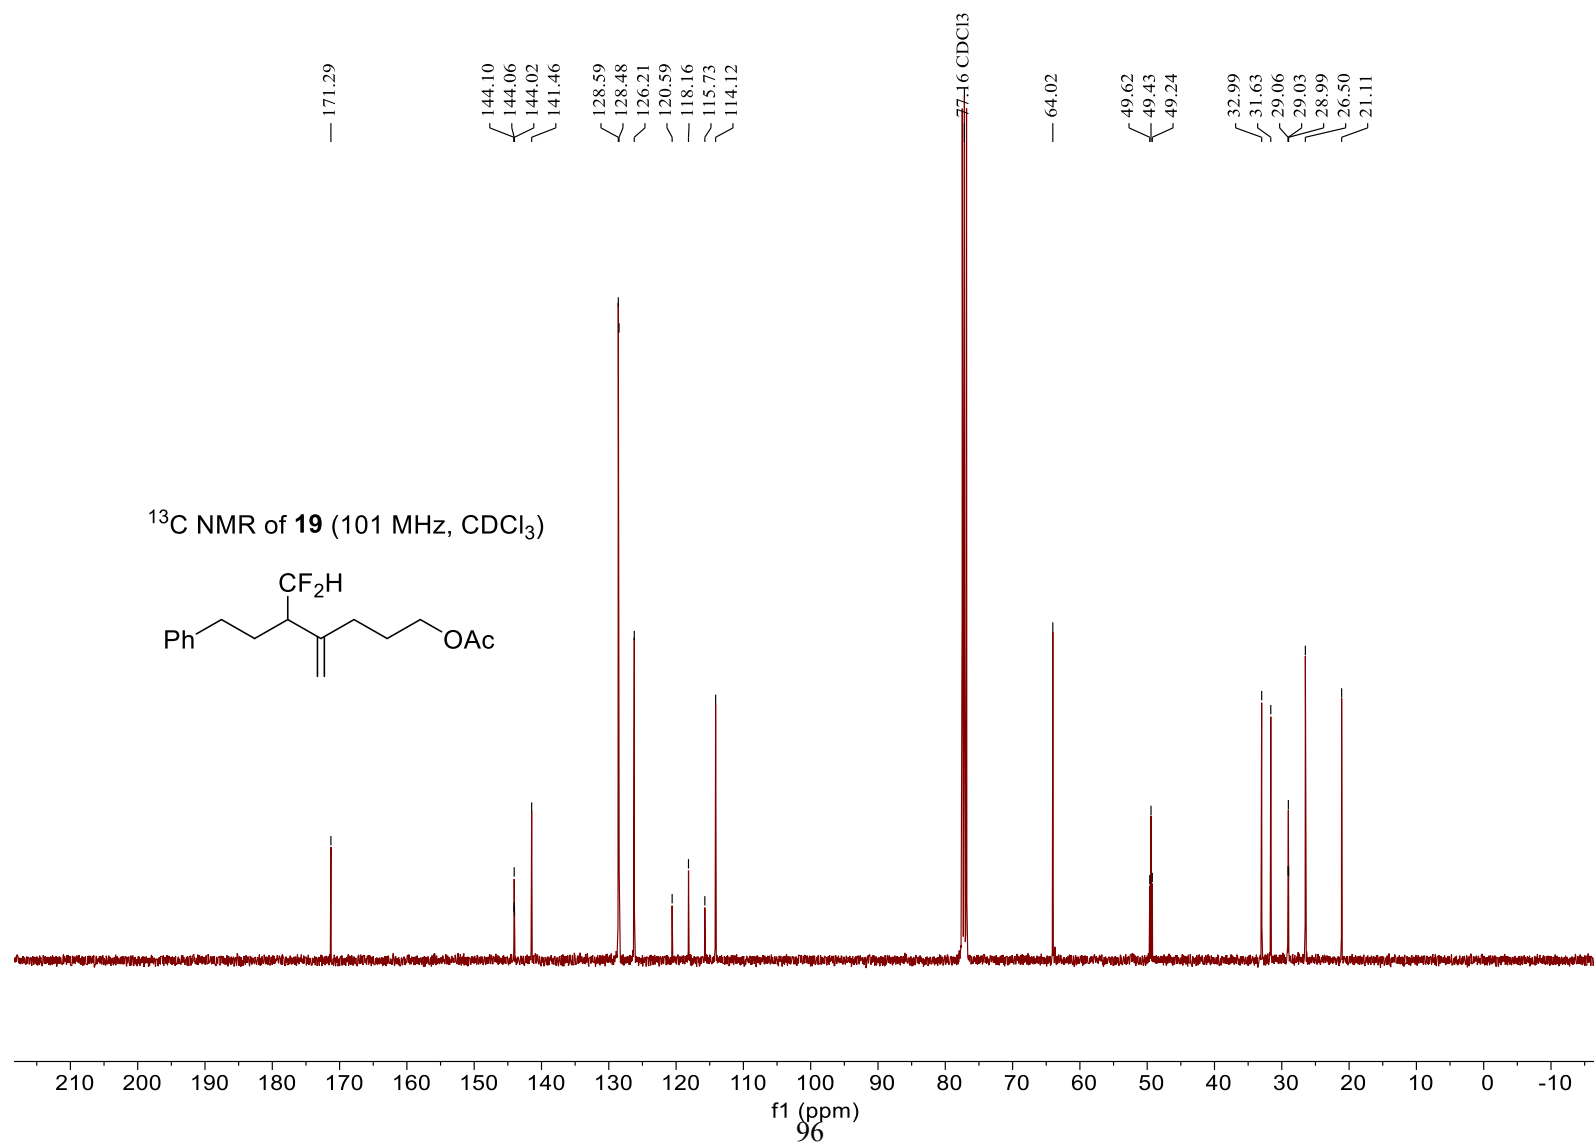

<sup>19</sup>F NMR of **19** (376 MHz, CDCl<sub>3</sub>)

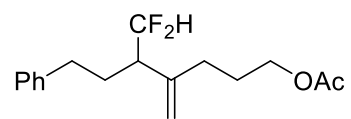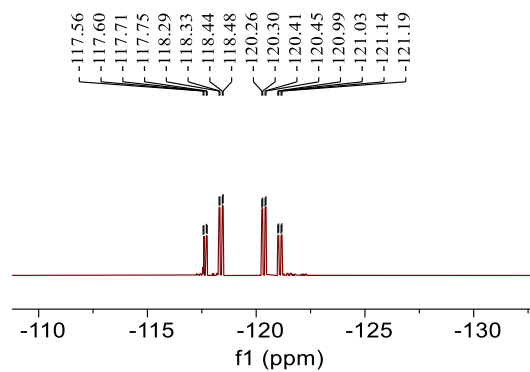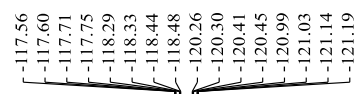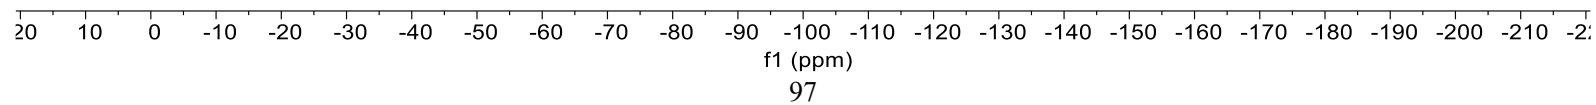

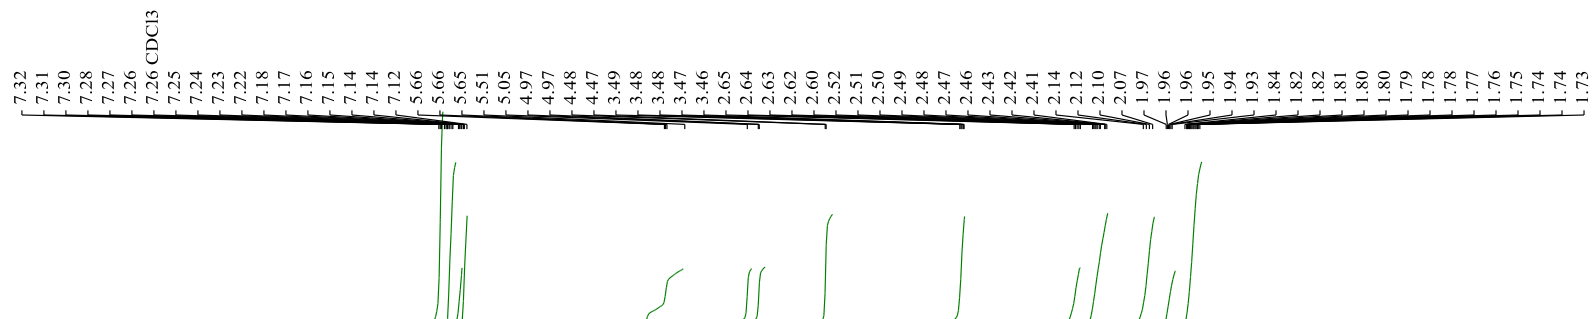

<sup>1</sup>H NMR of **20** (400 MHz, CDCl<sub>3</sub>)

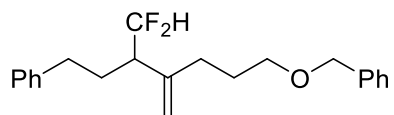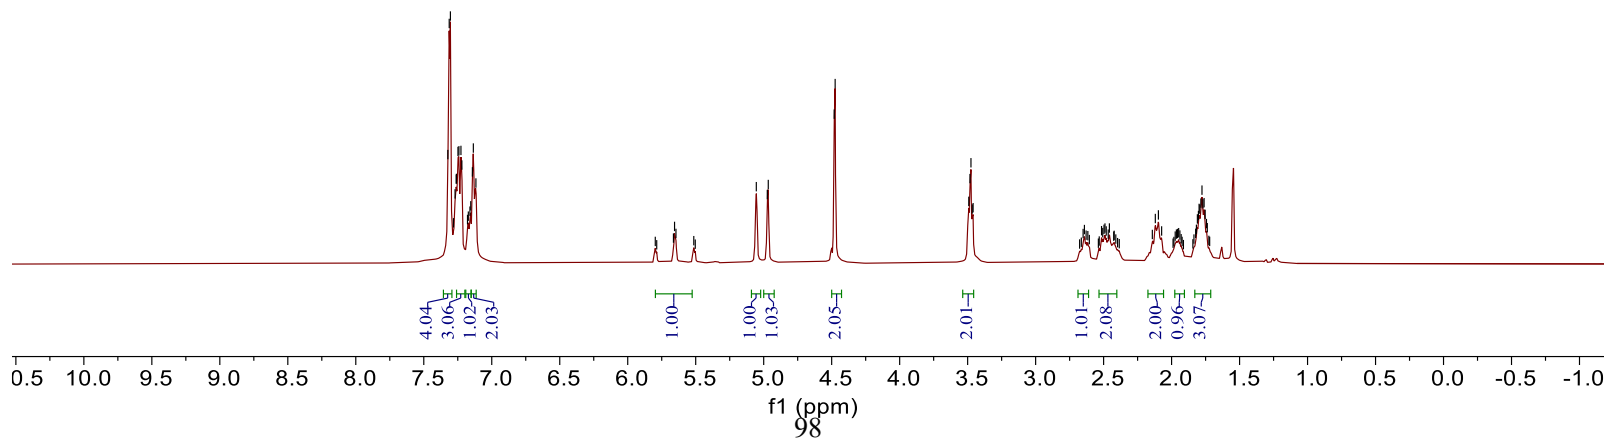

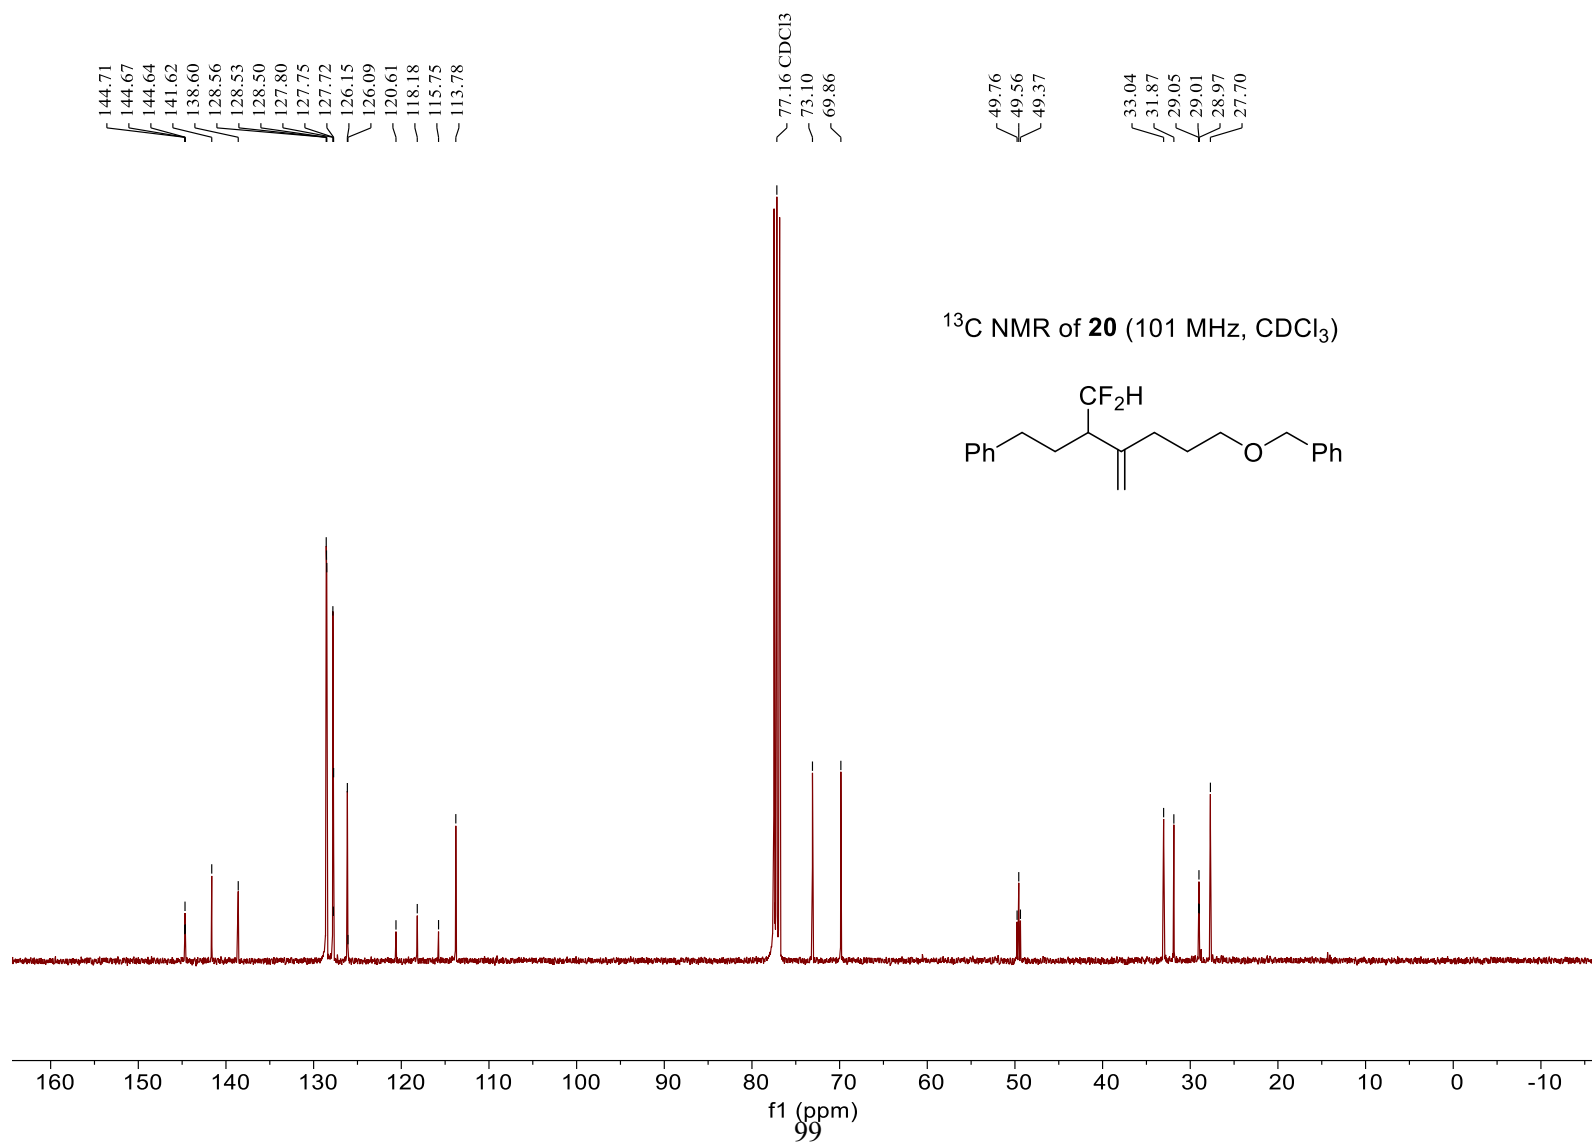

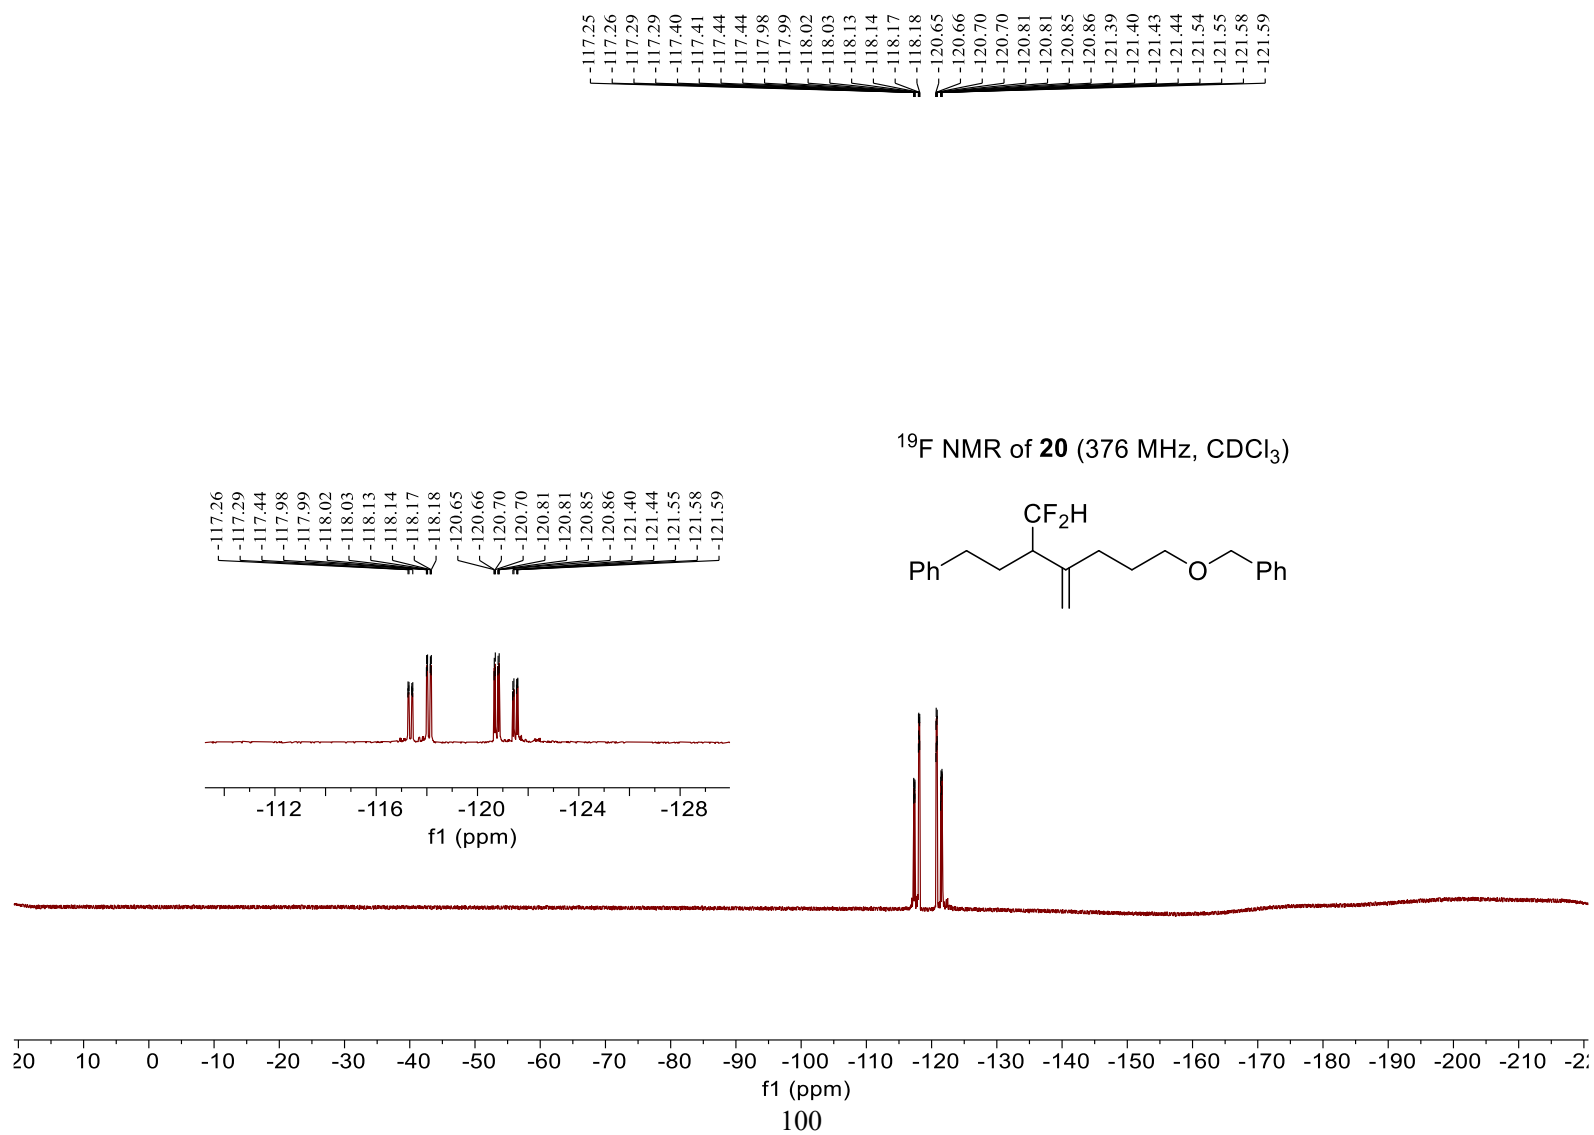



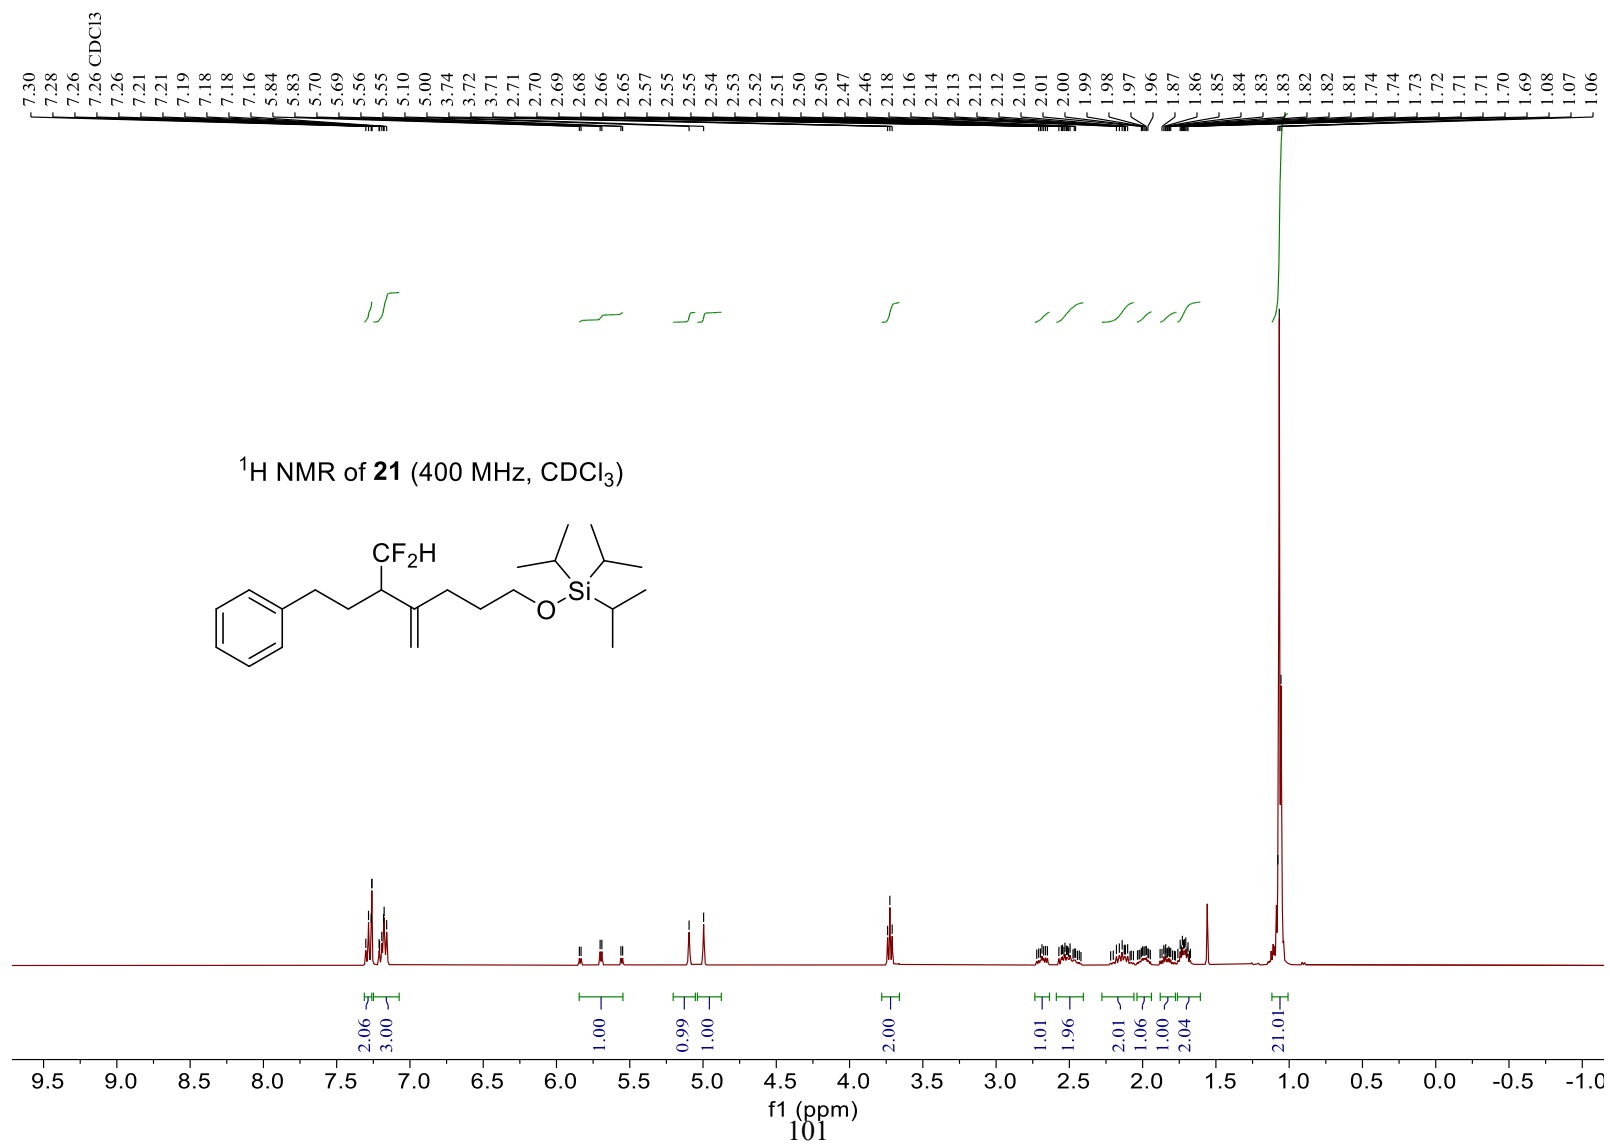

$^{13}\text{C}$  NMR of **21** (101 MHz,  $\text{CDCl}_3$ )

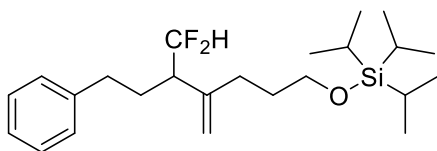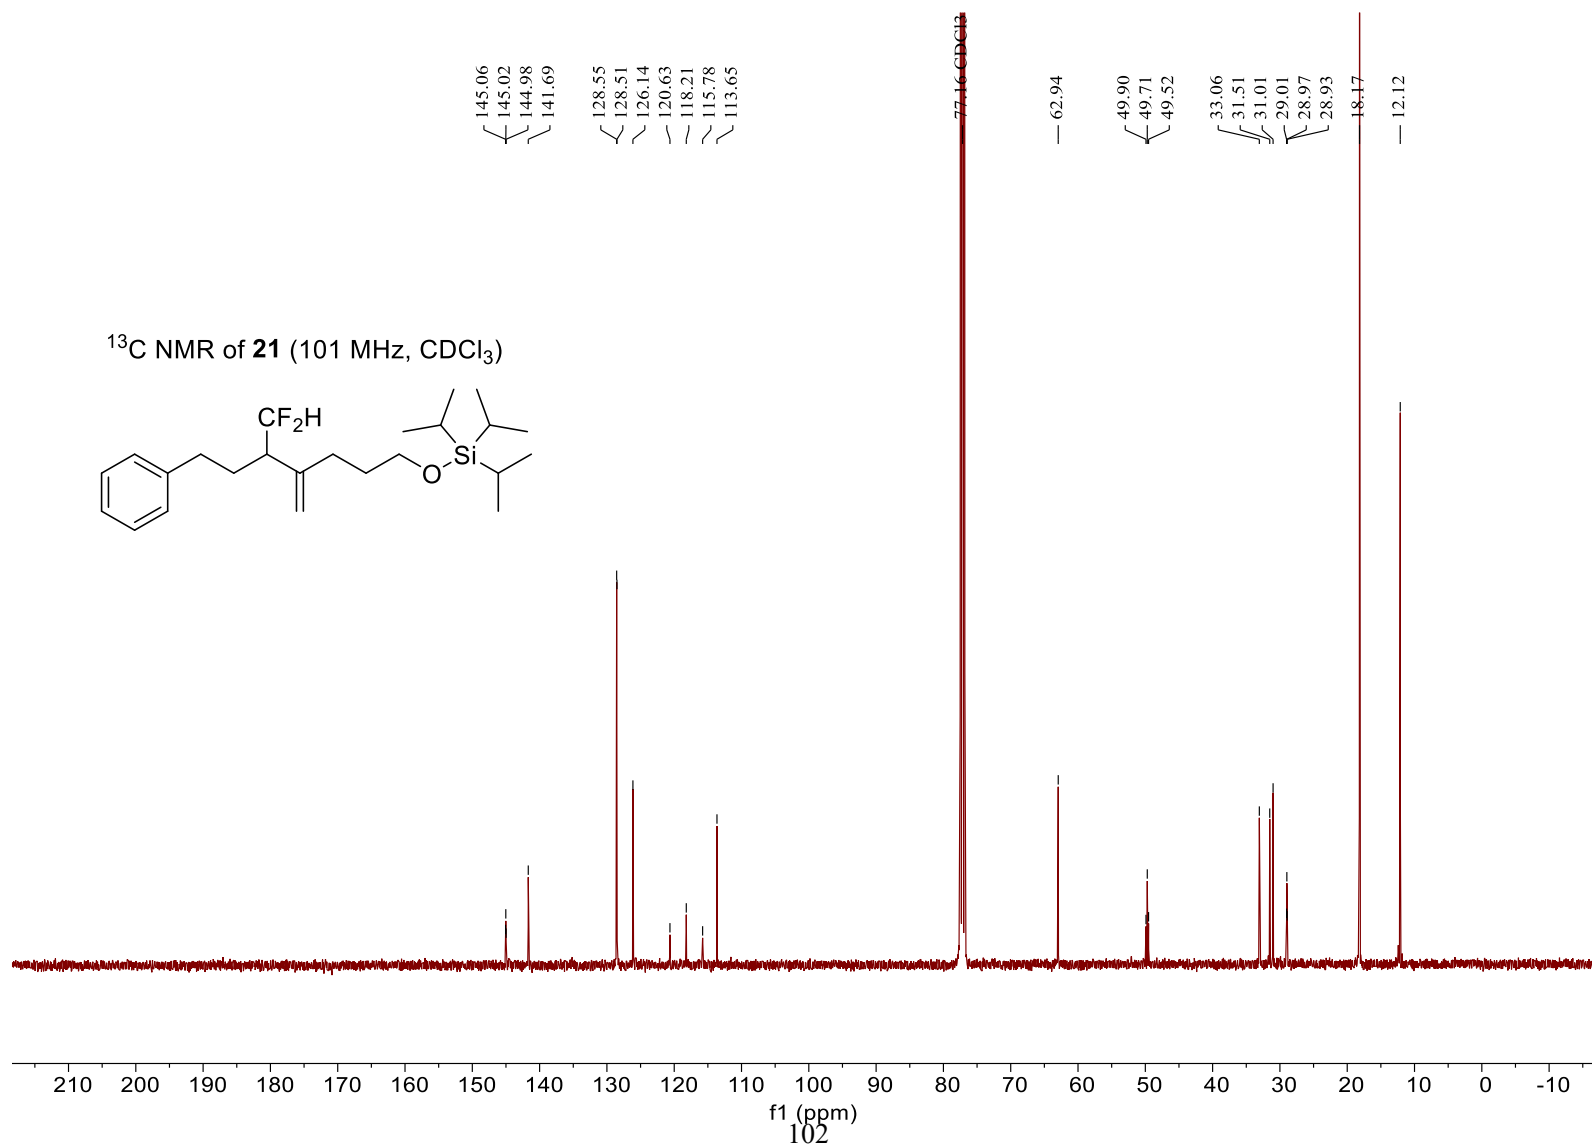

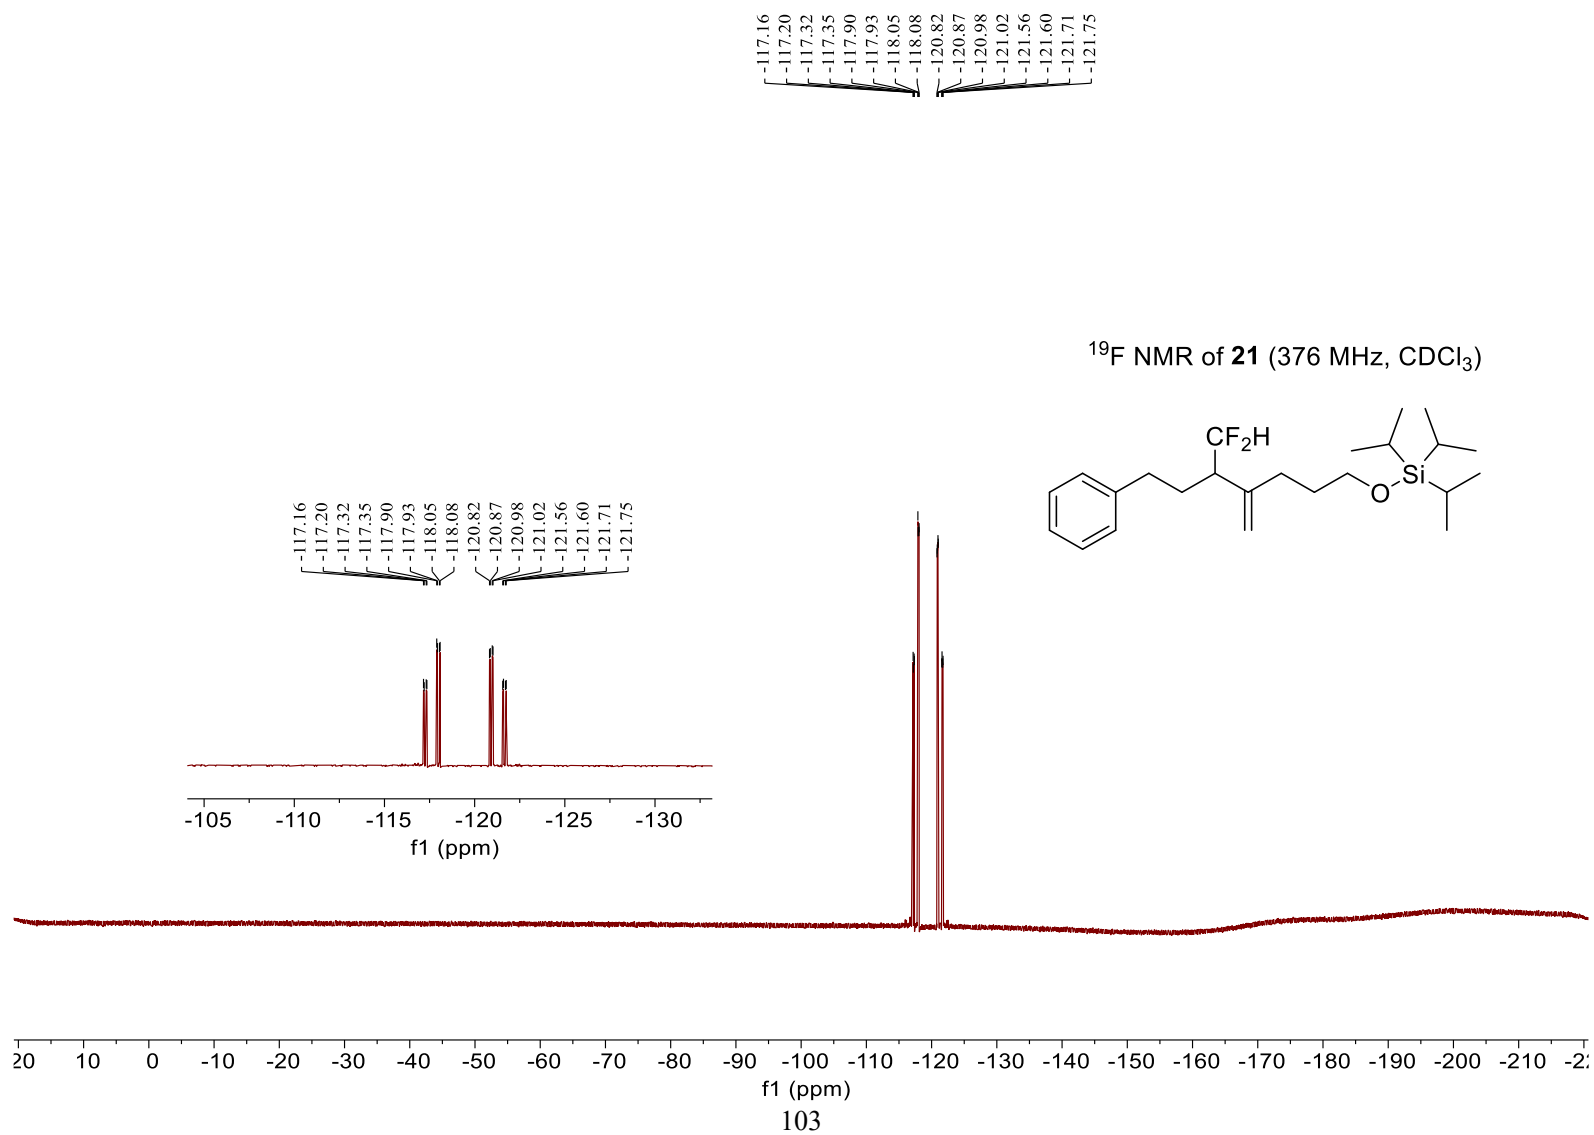

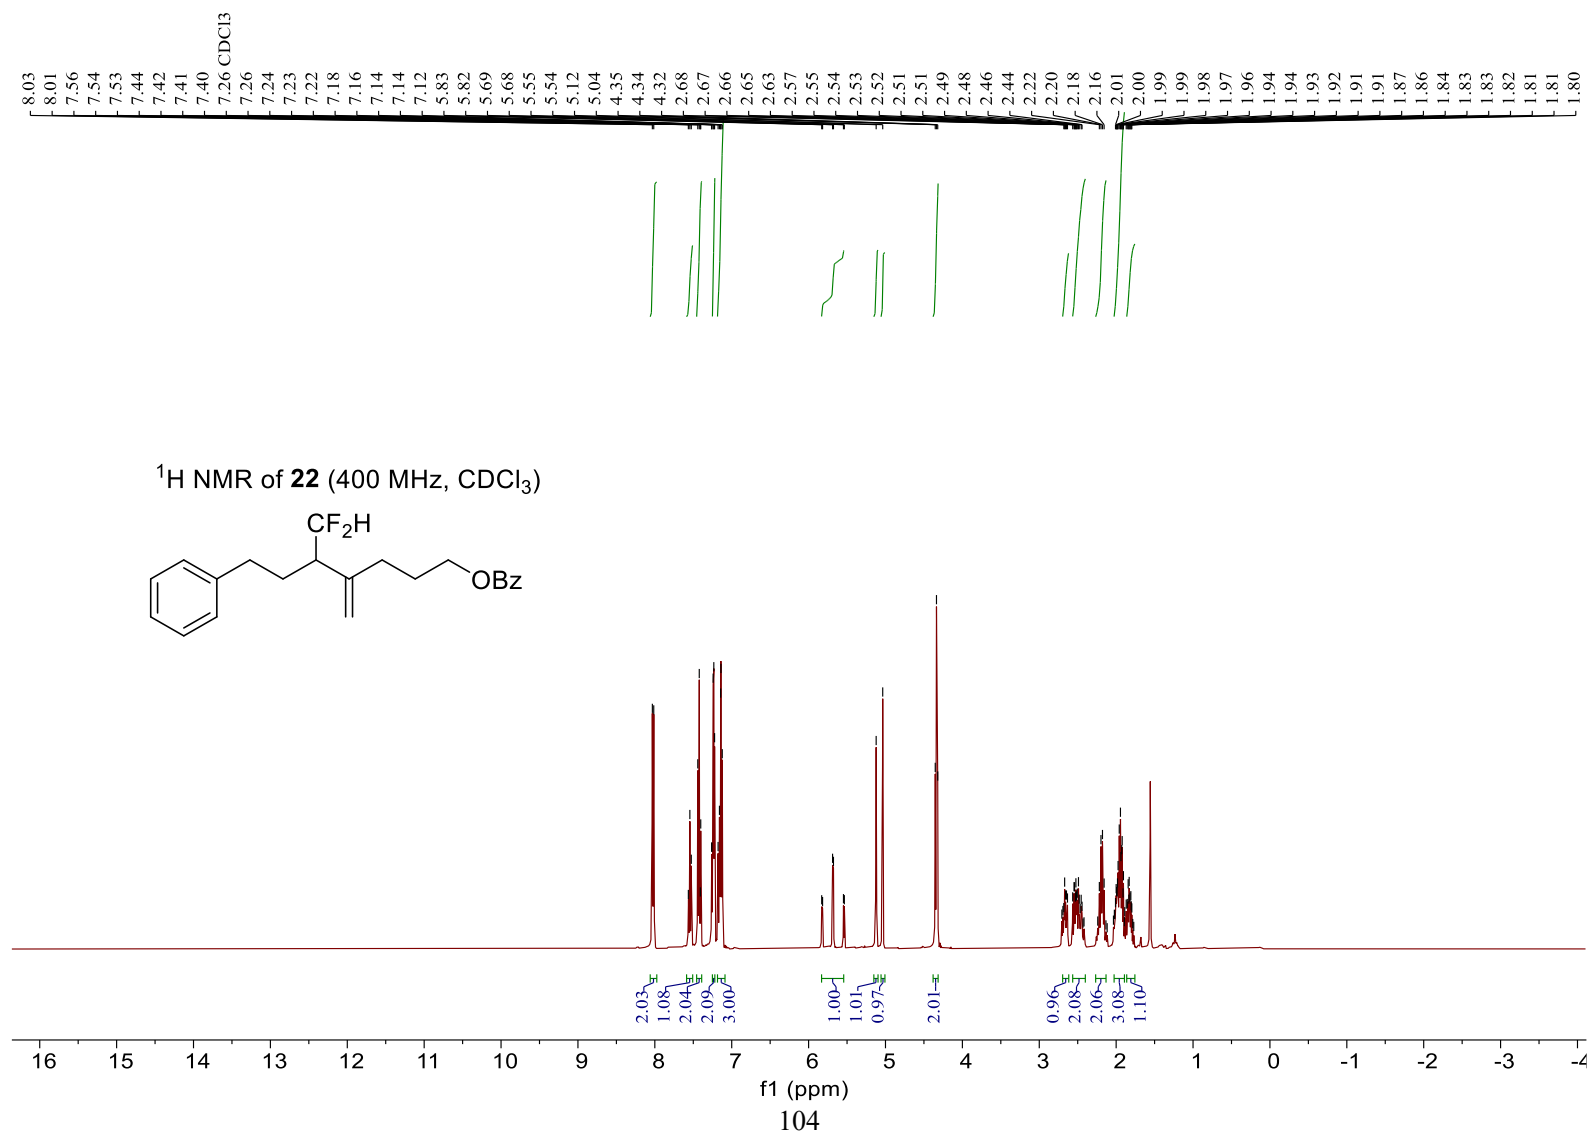

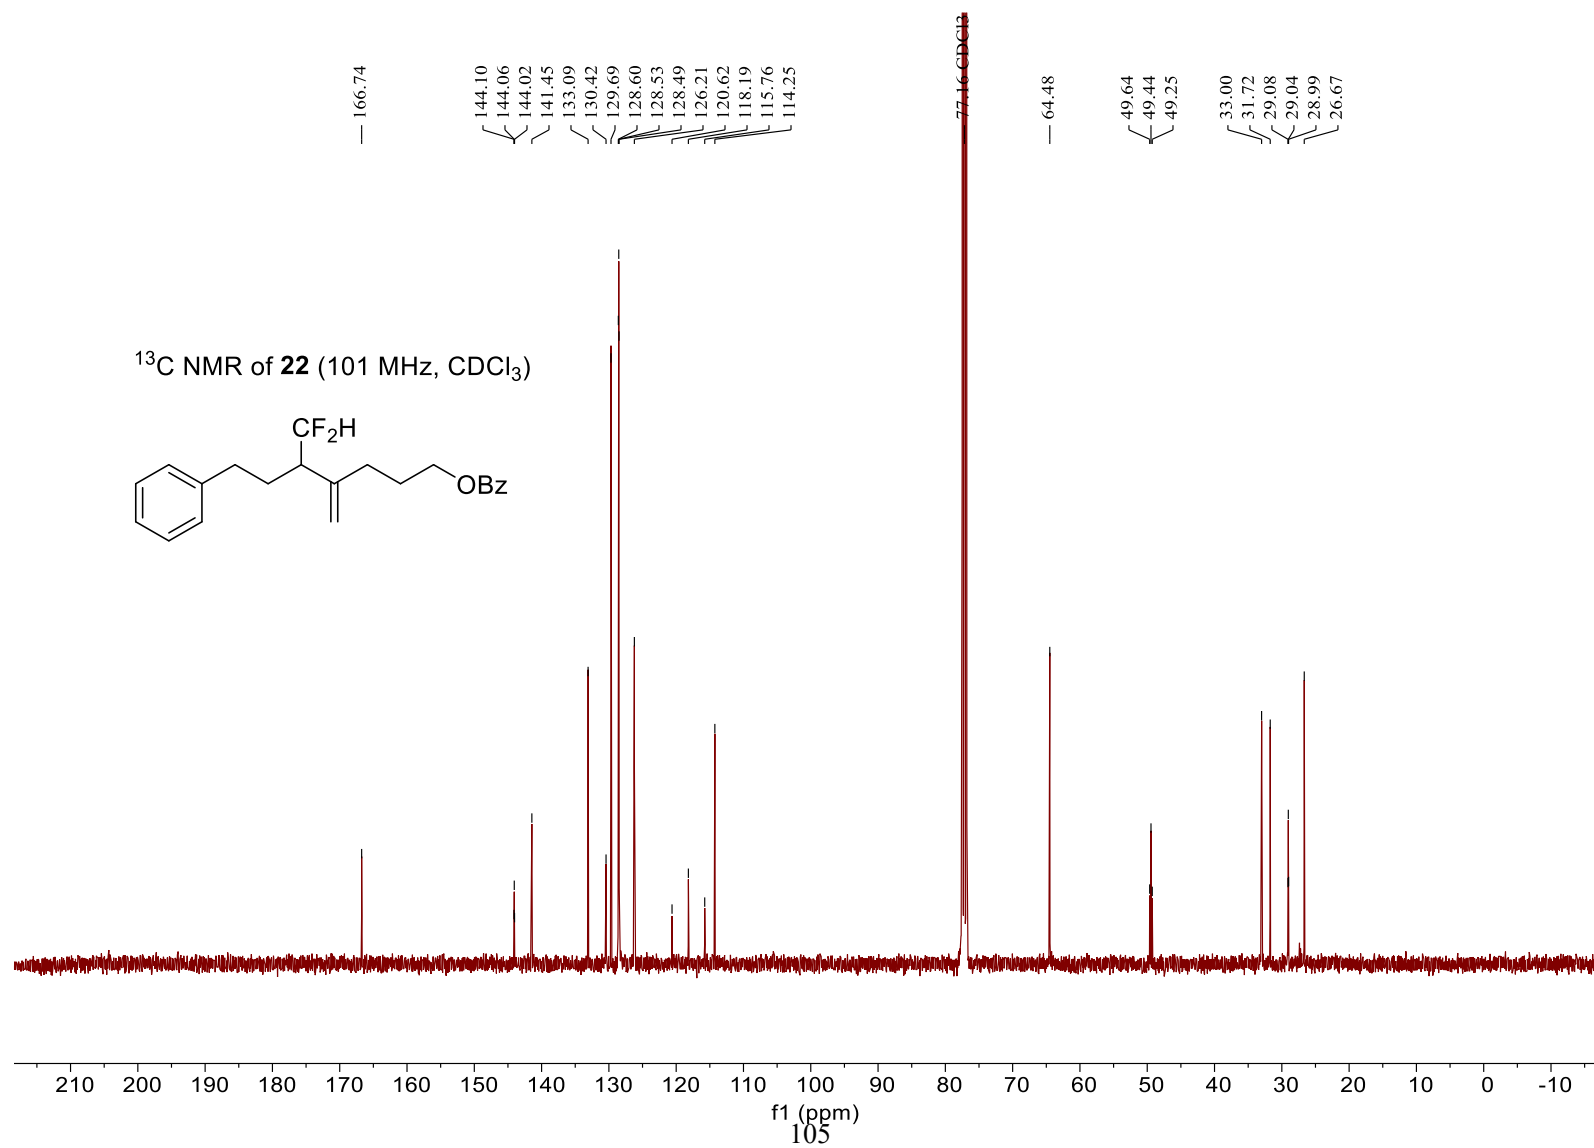

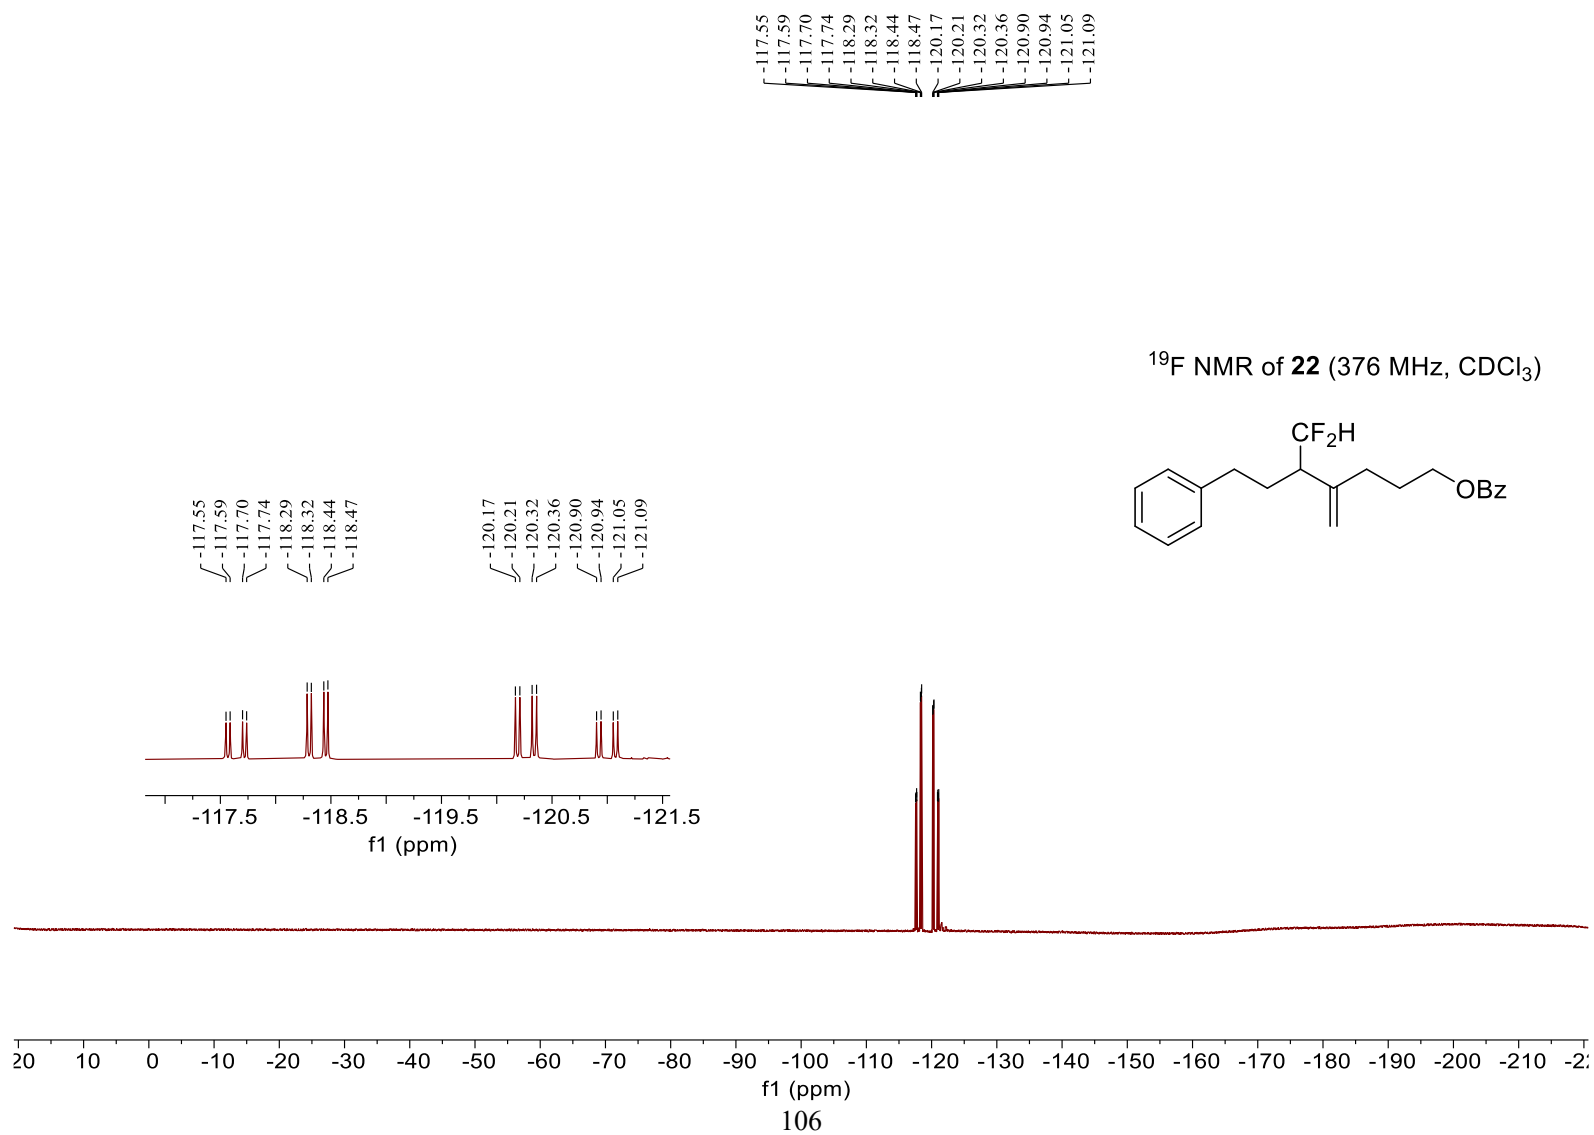

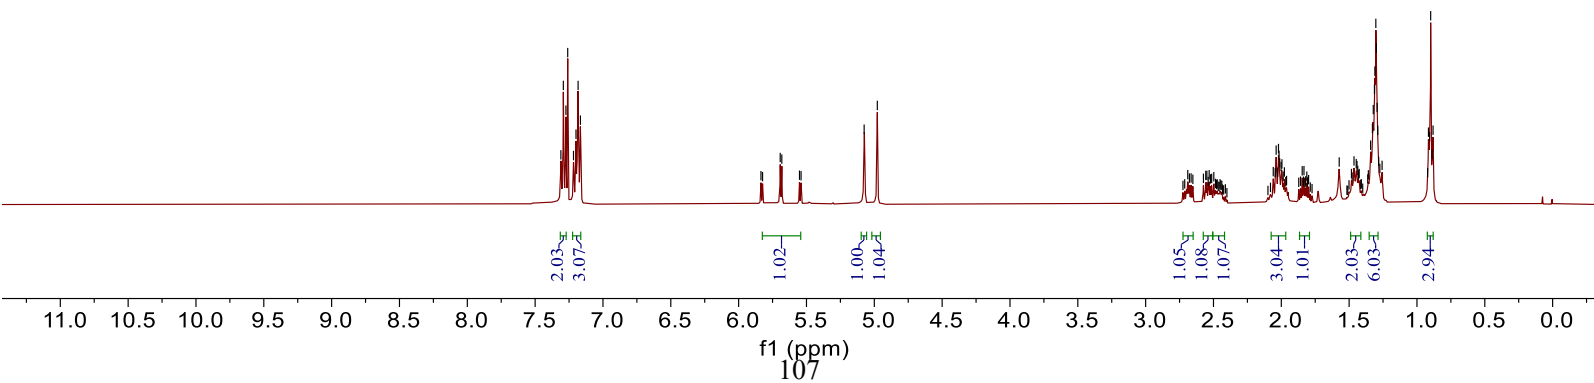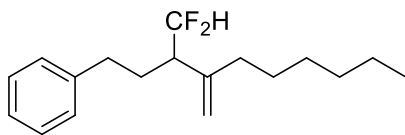

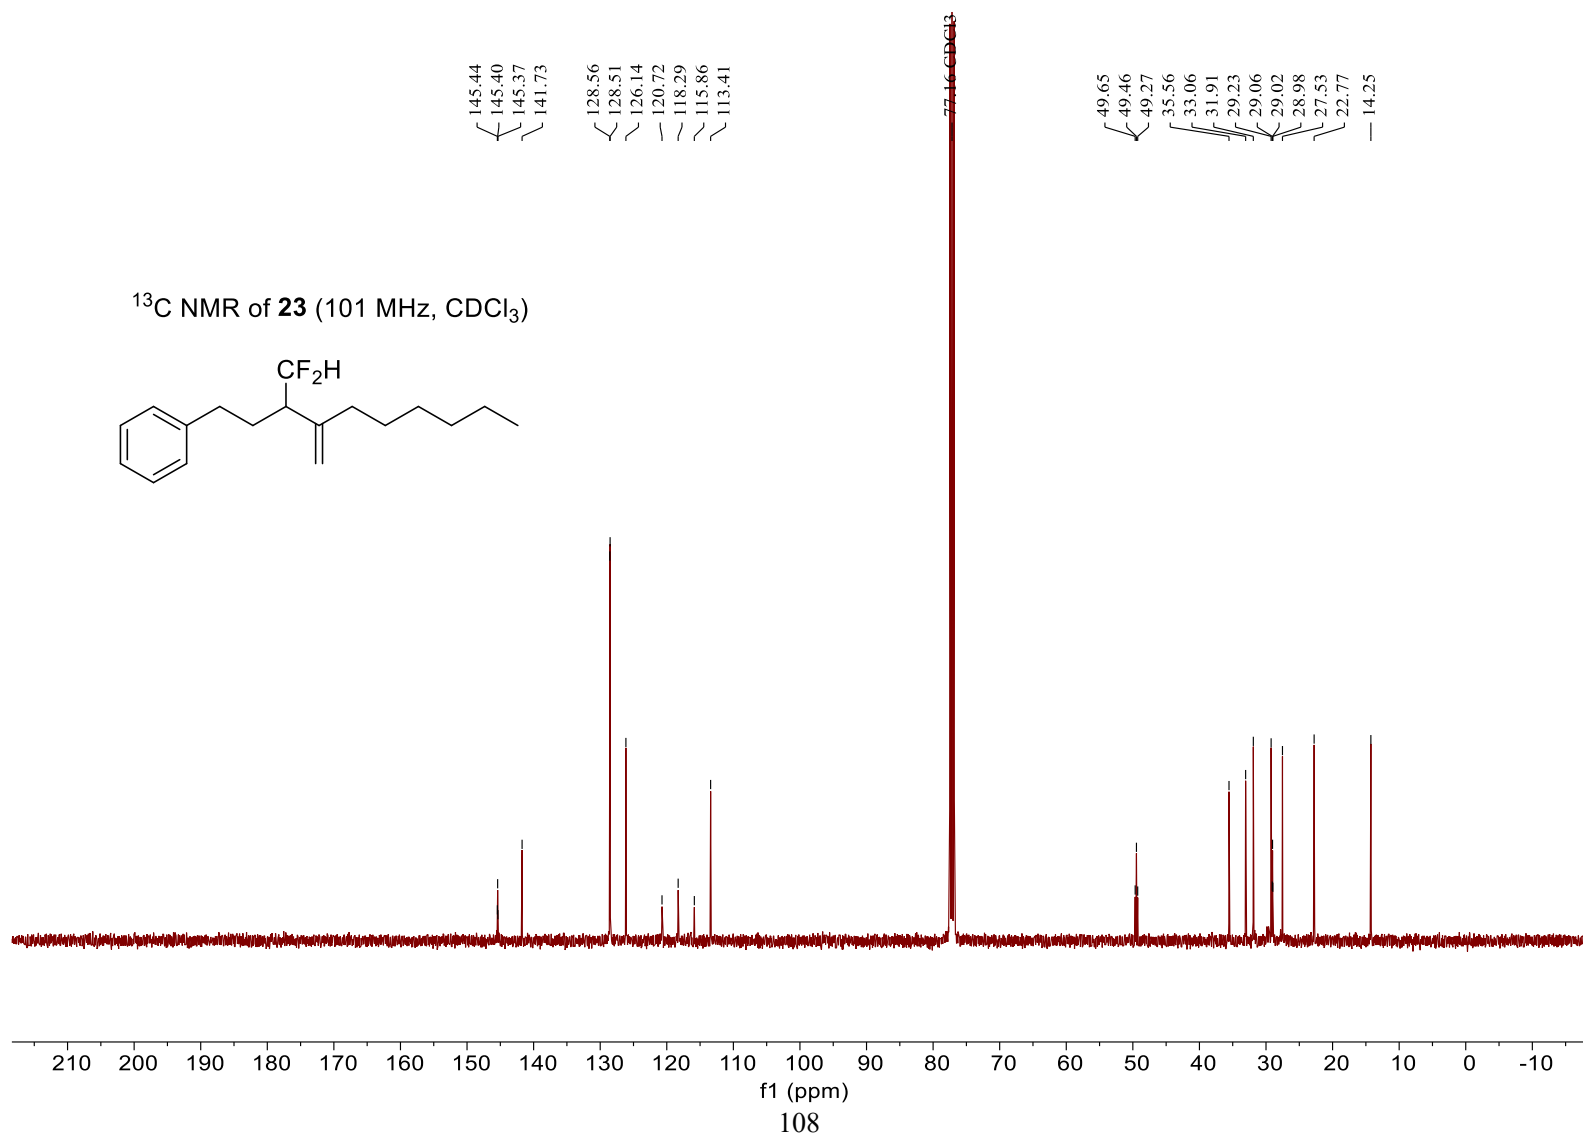



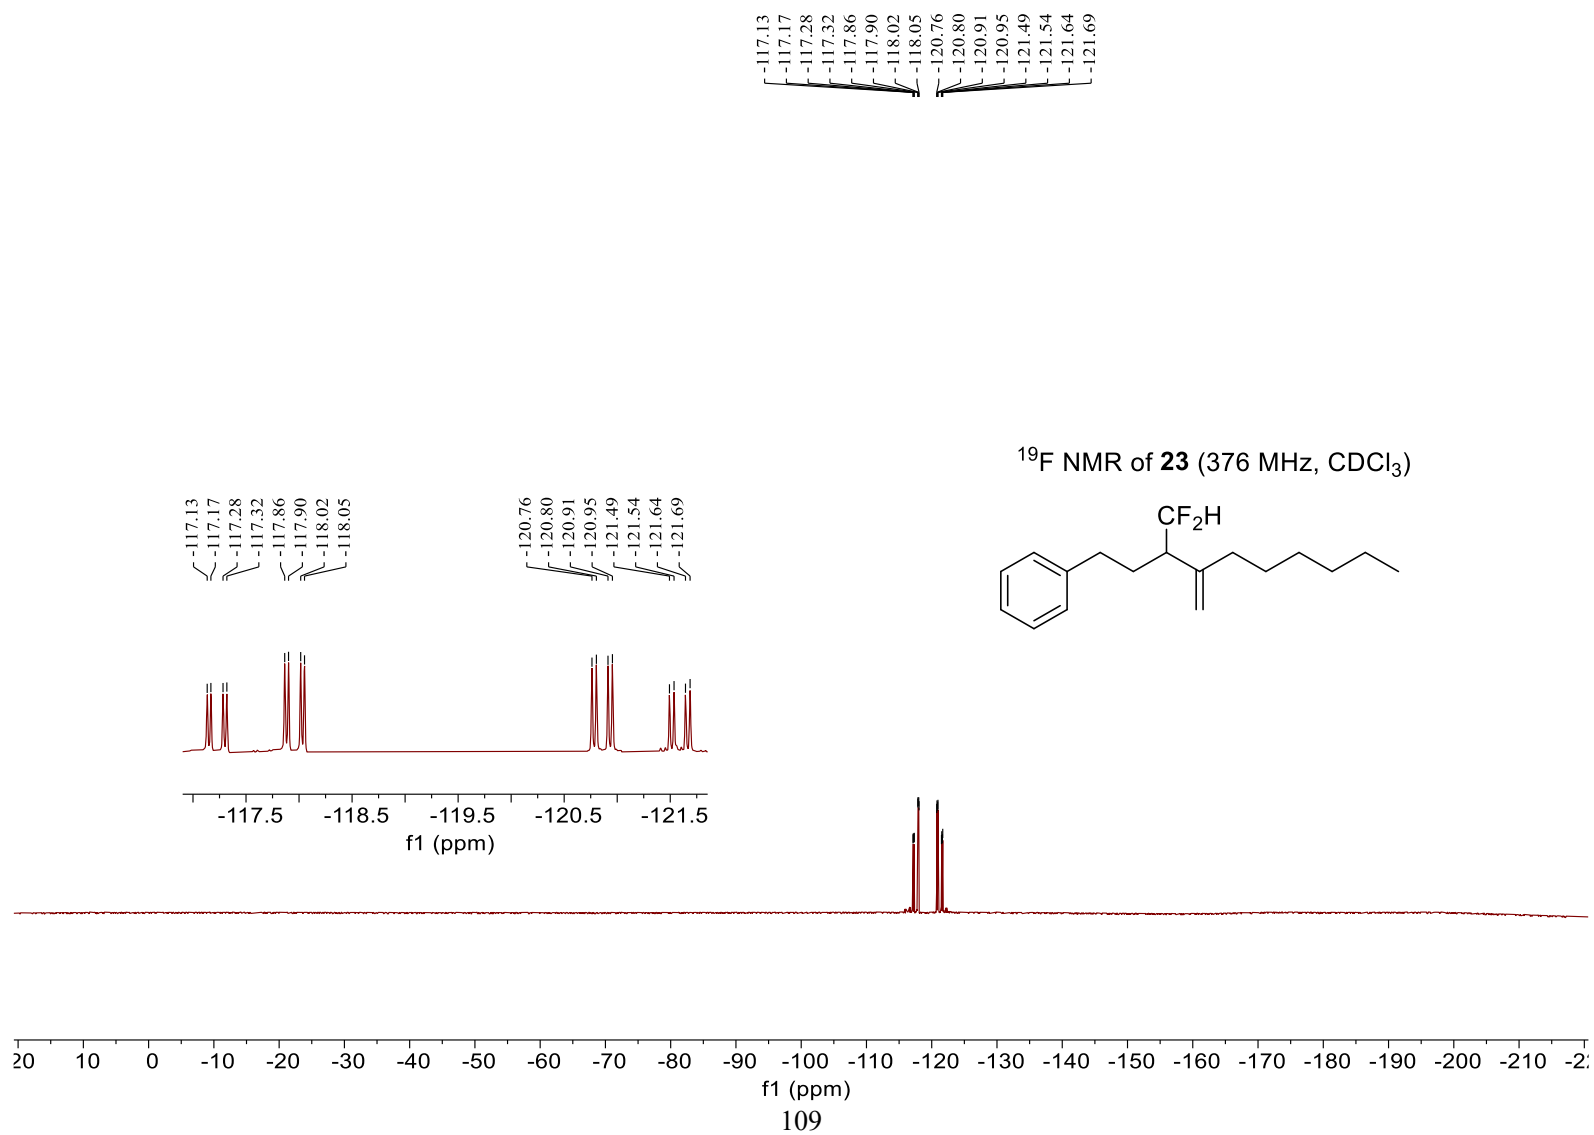

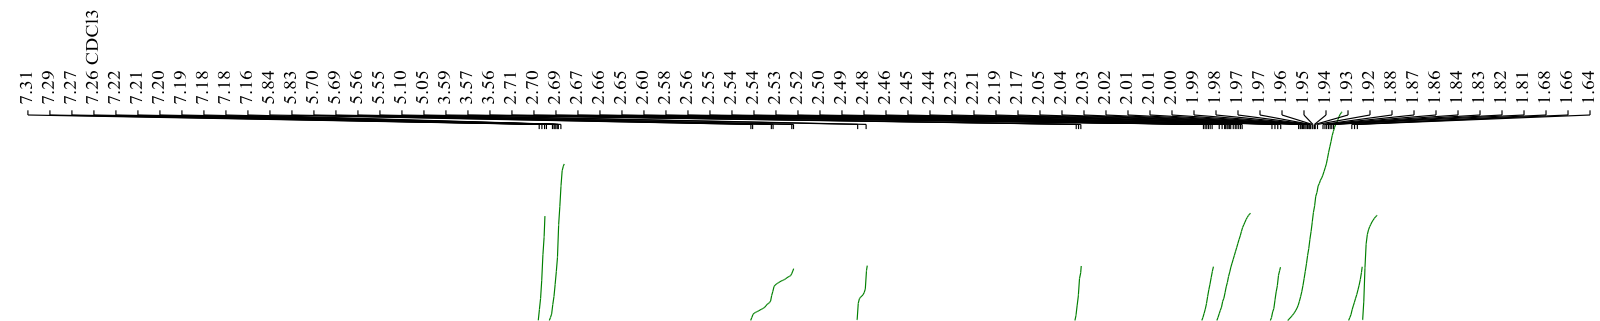

$^1\text{H}$  NMR of **24** (400 MHz,  $\text{CDCl}_3$ )

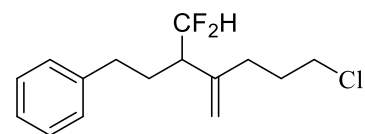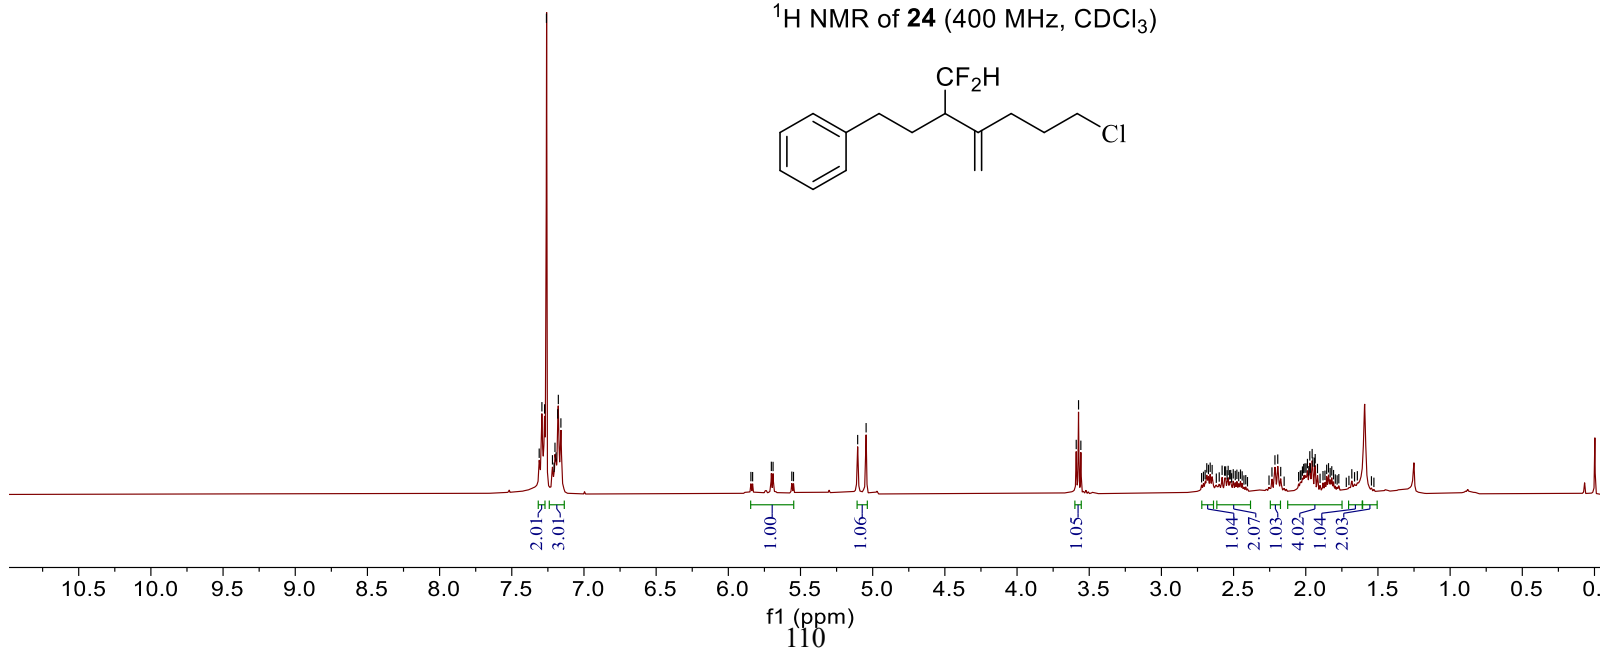

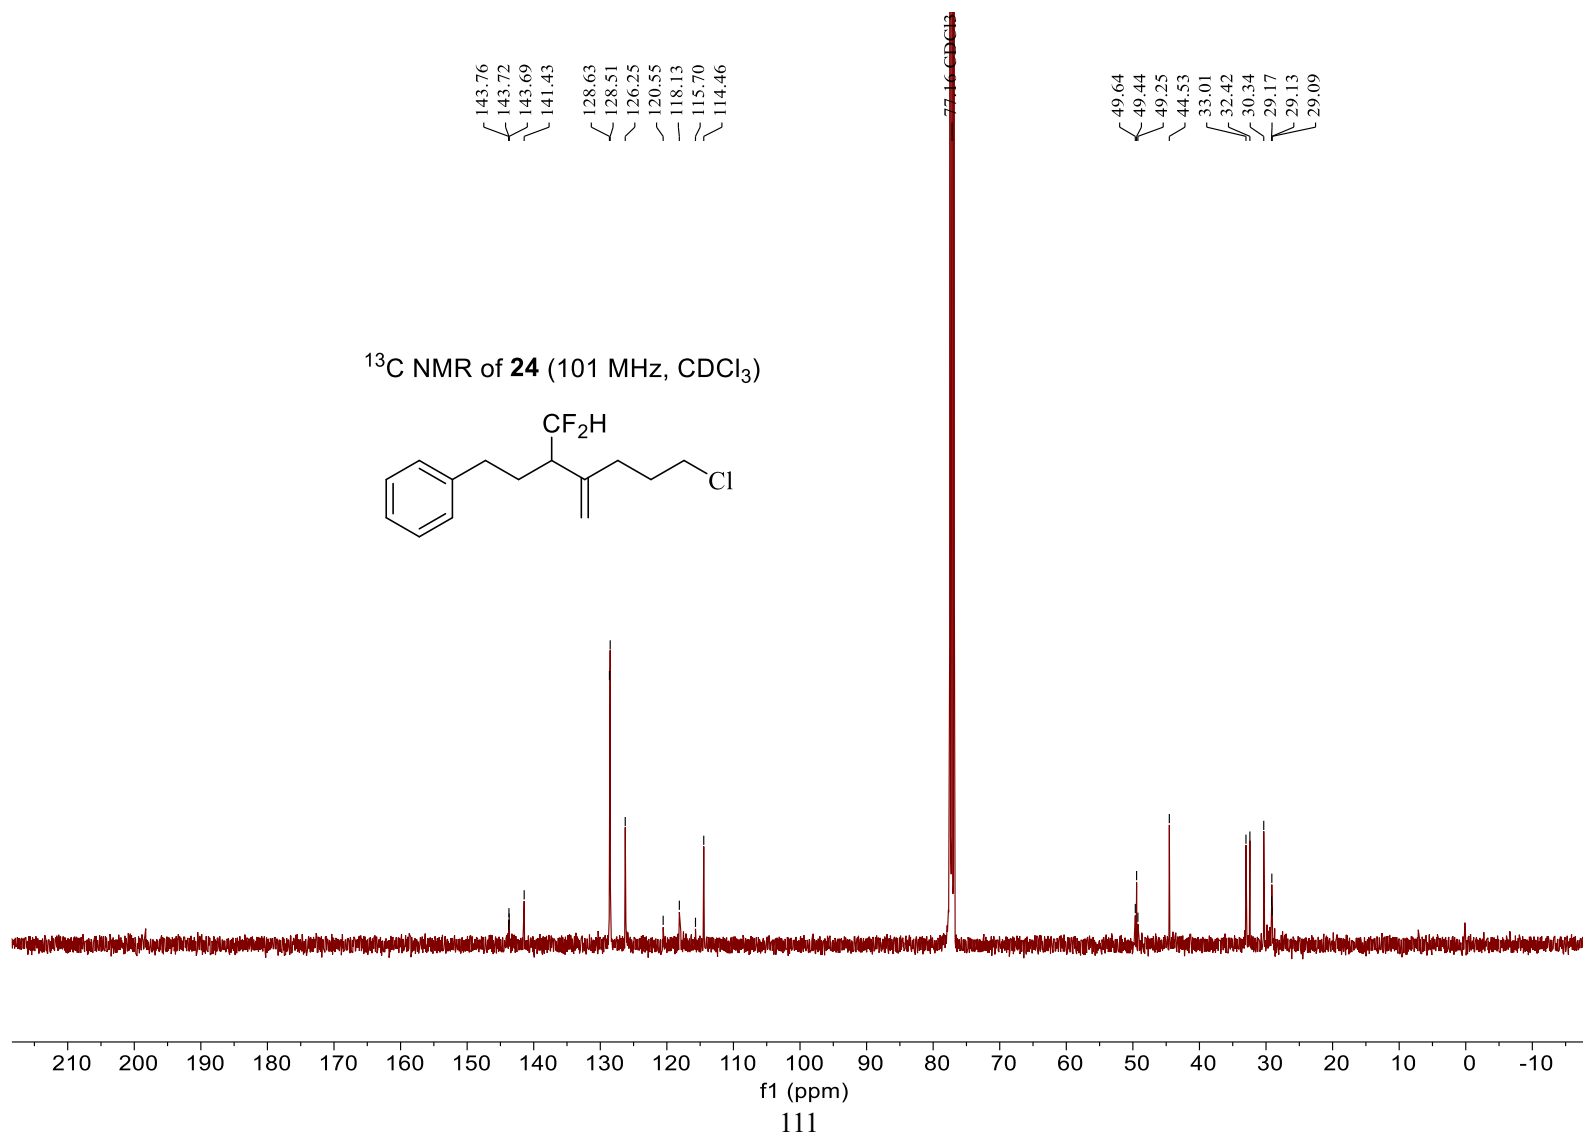

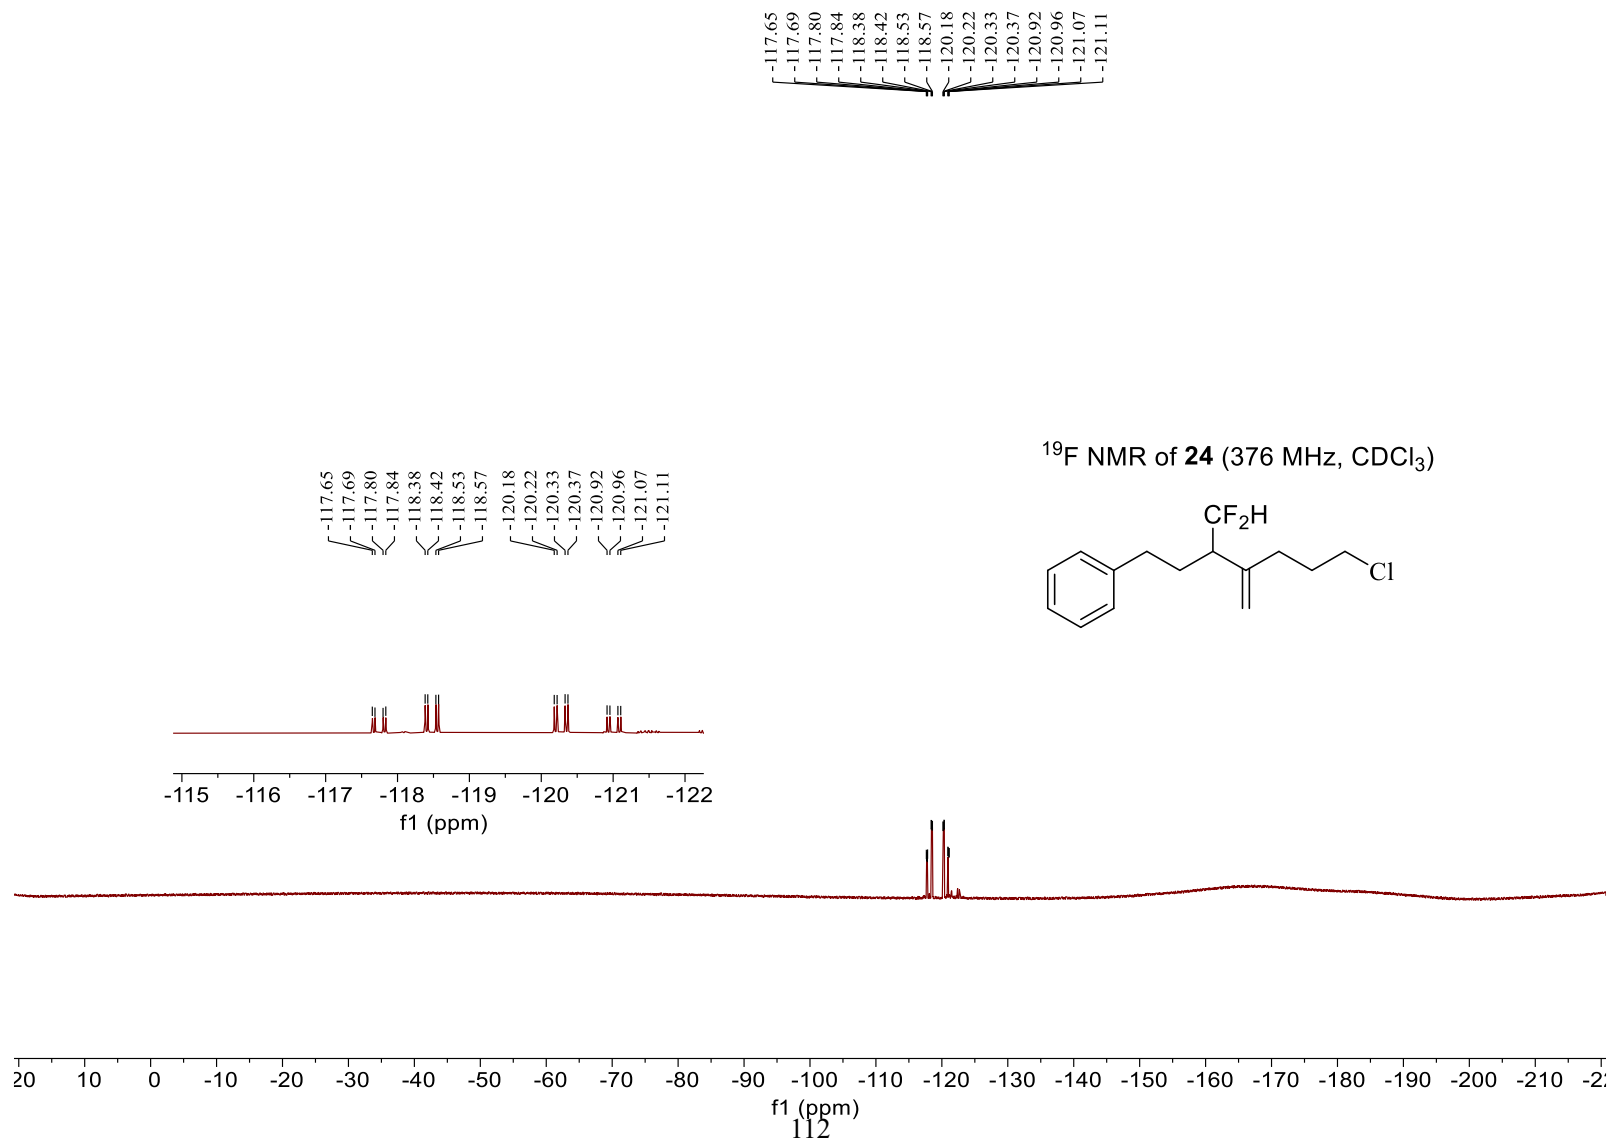

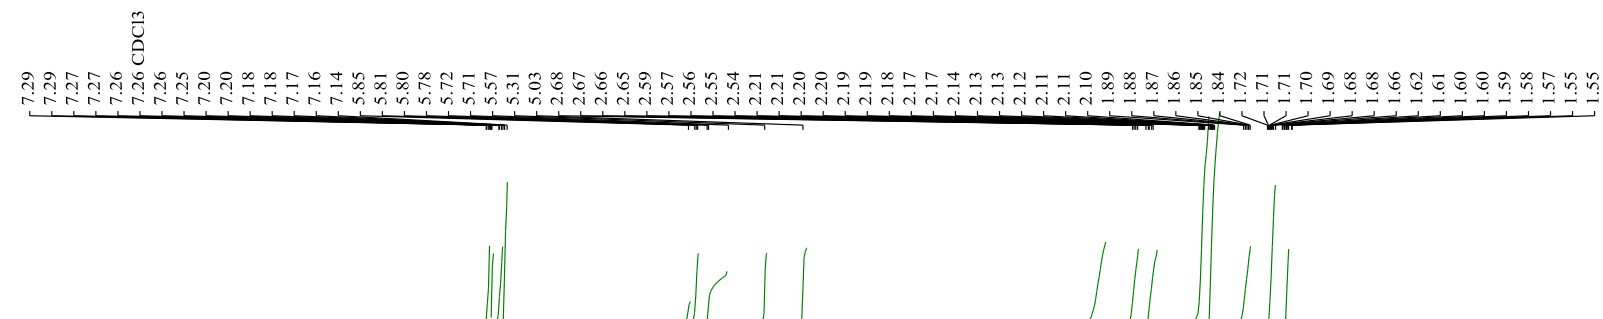

<sup>1</sup>H NMR of **25** (400 MHz, CDCl<sub>3</sub>)

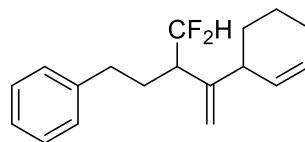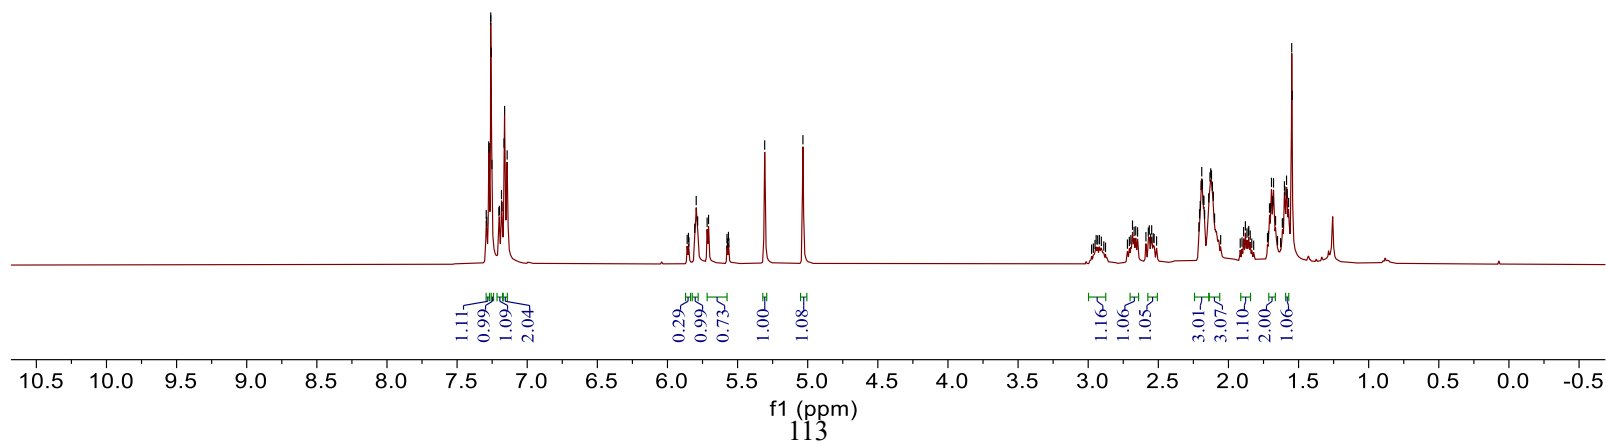

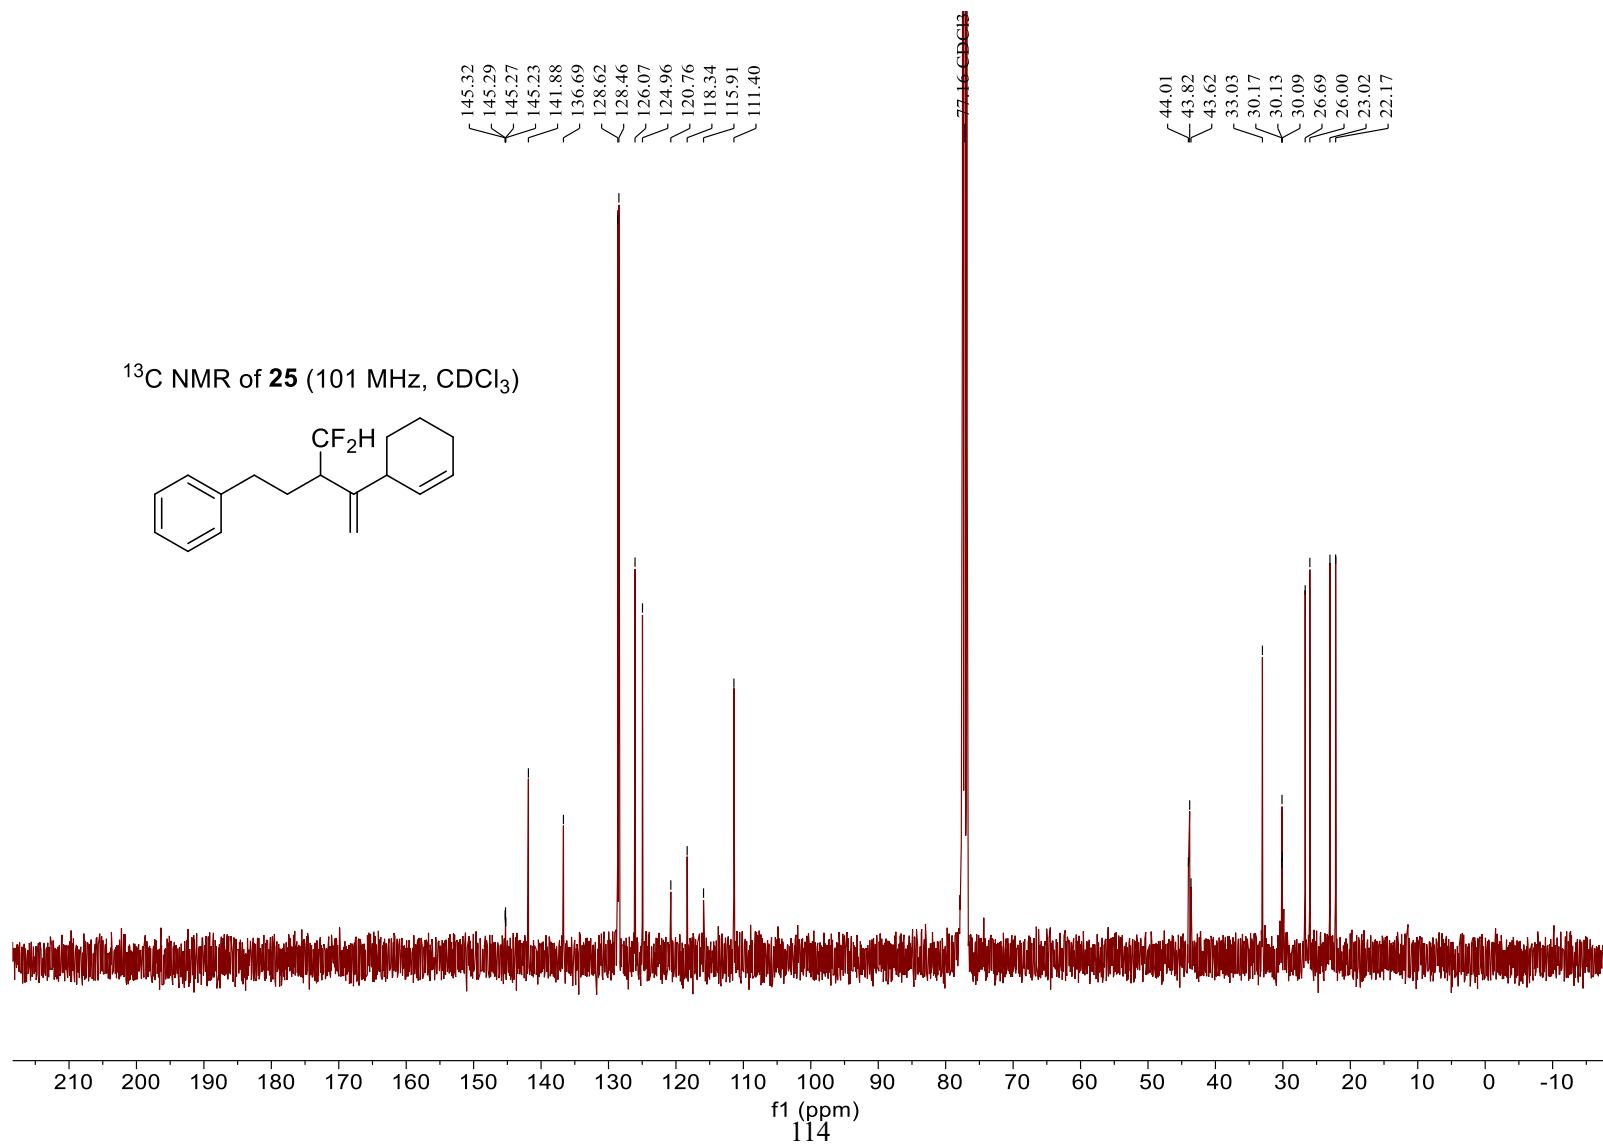

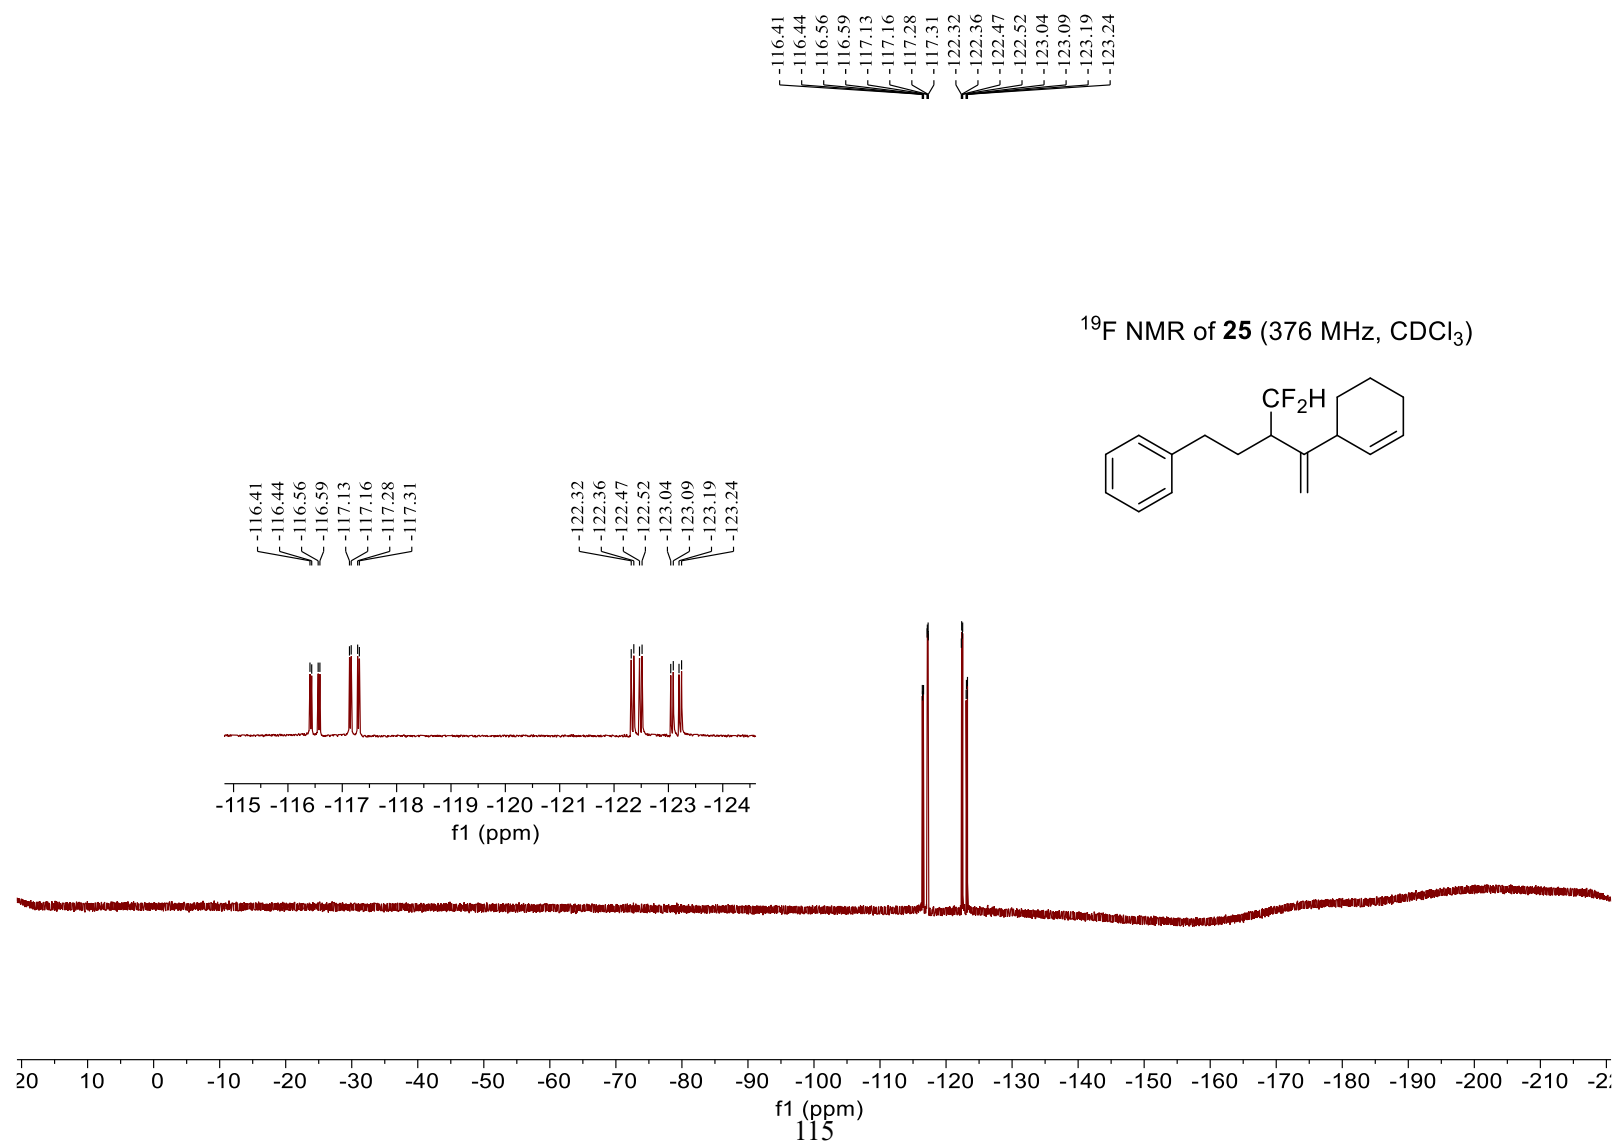

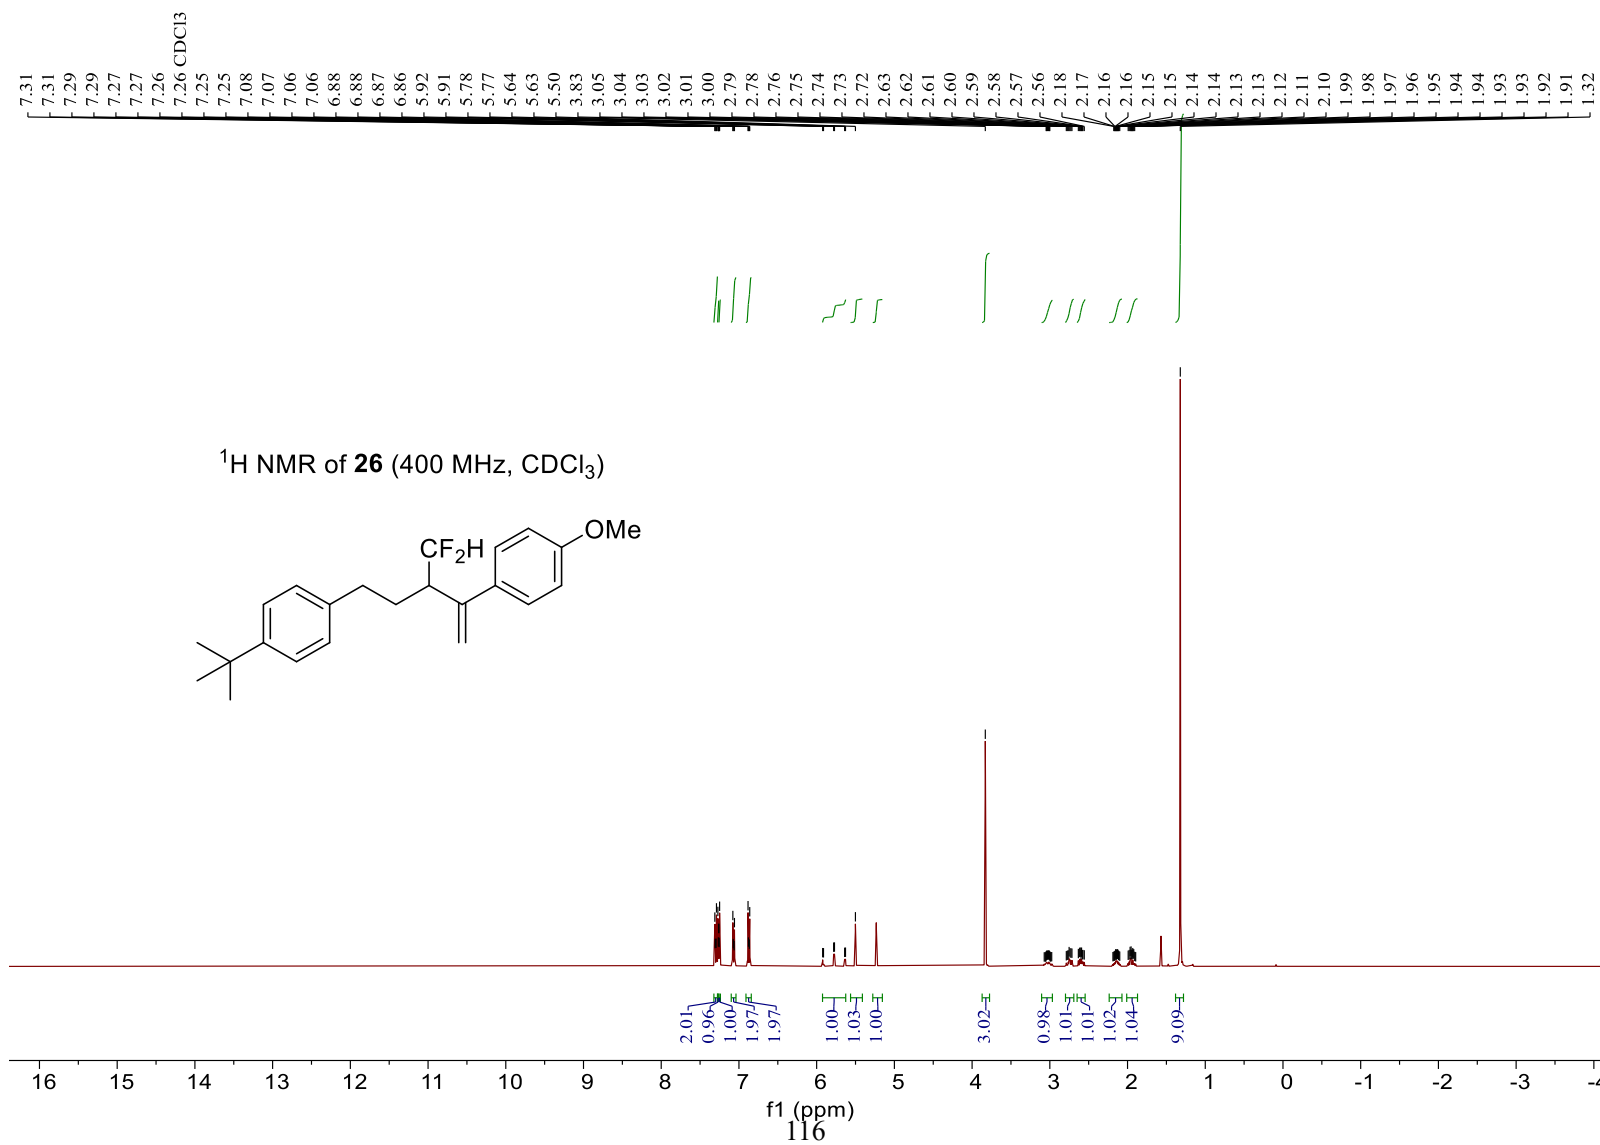



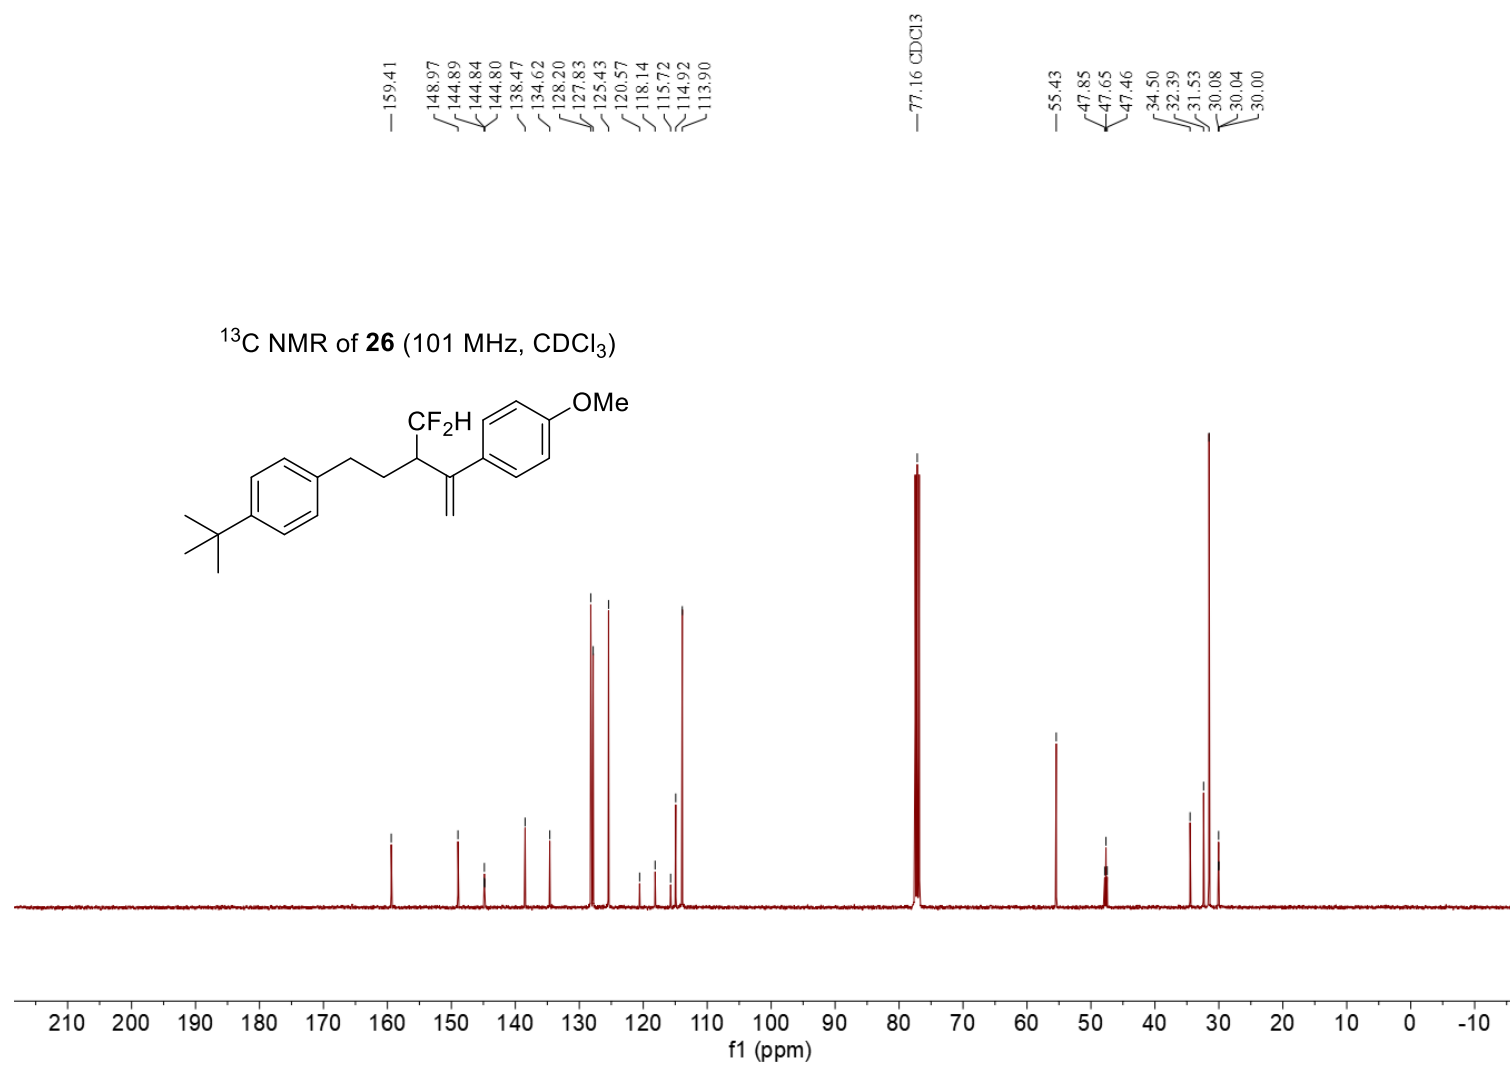

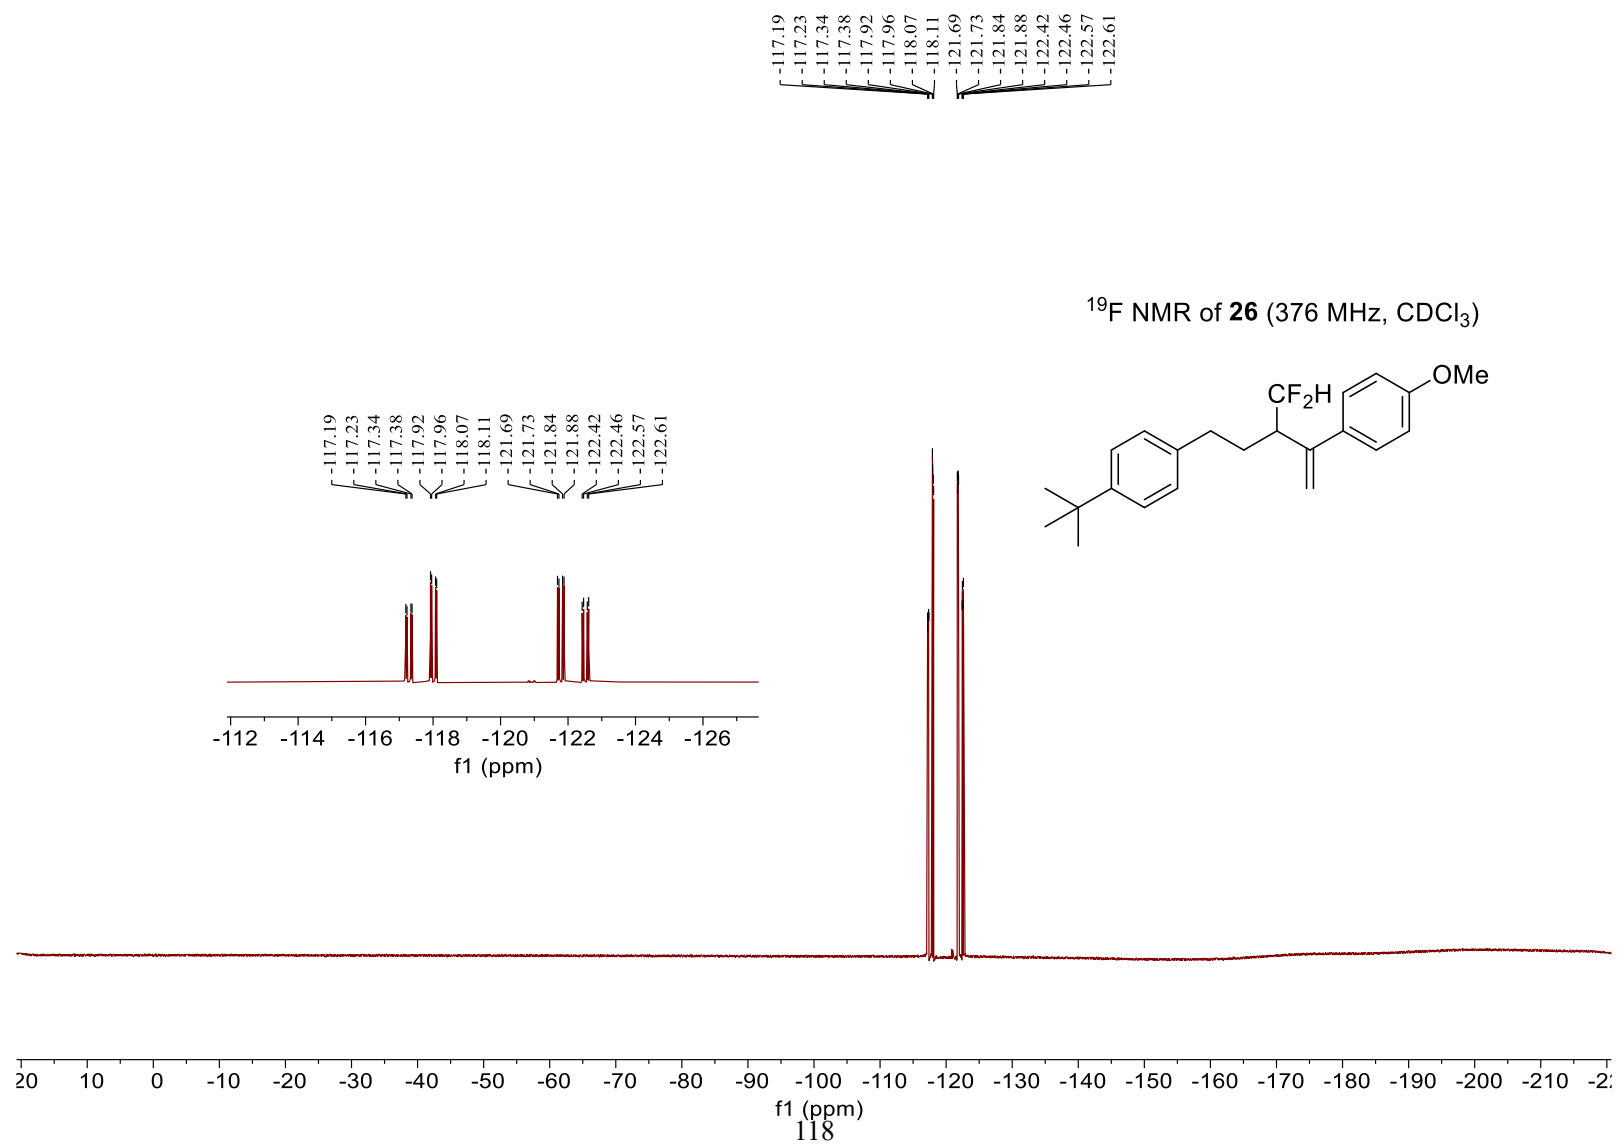

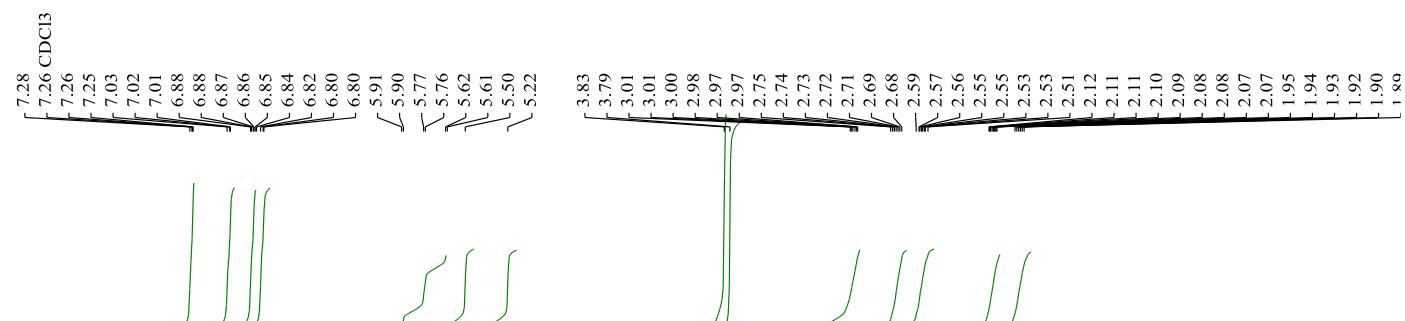

<sup>1</sup>H NMR of **27** (400 MHz, CDCl<sub>3</sub>)

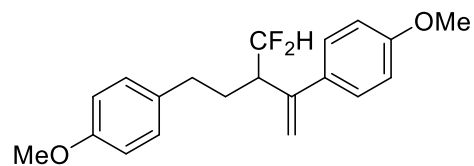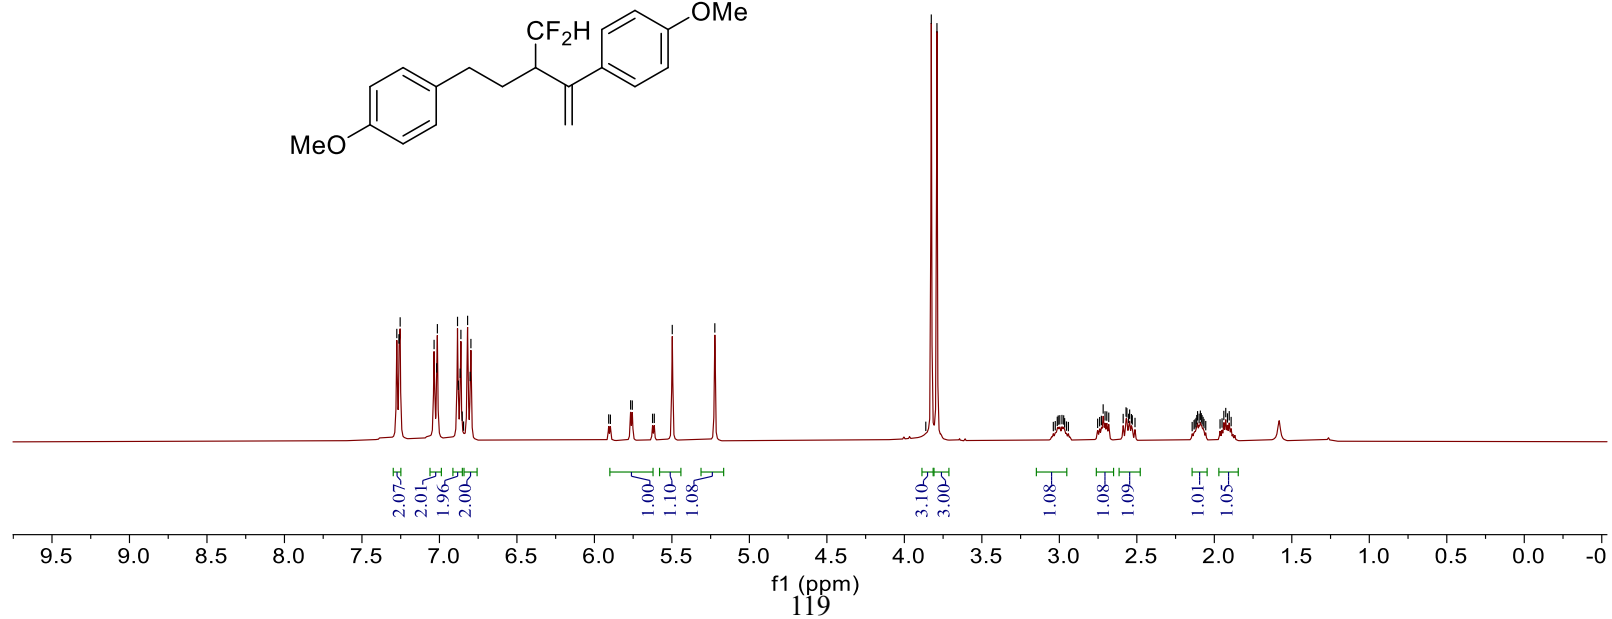

<sup>13</sup>C NMR of **27** (101 MHz, CDCl<sub>3</sub>)

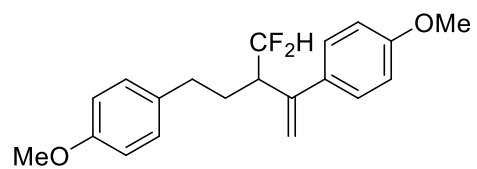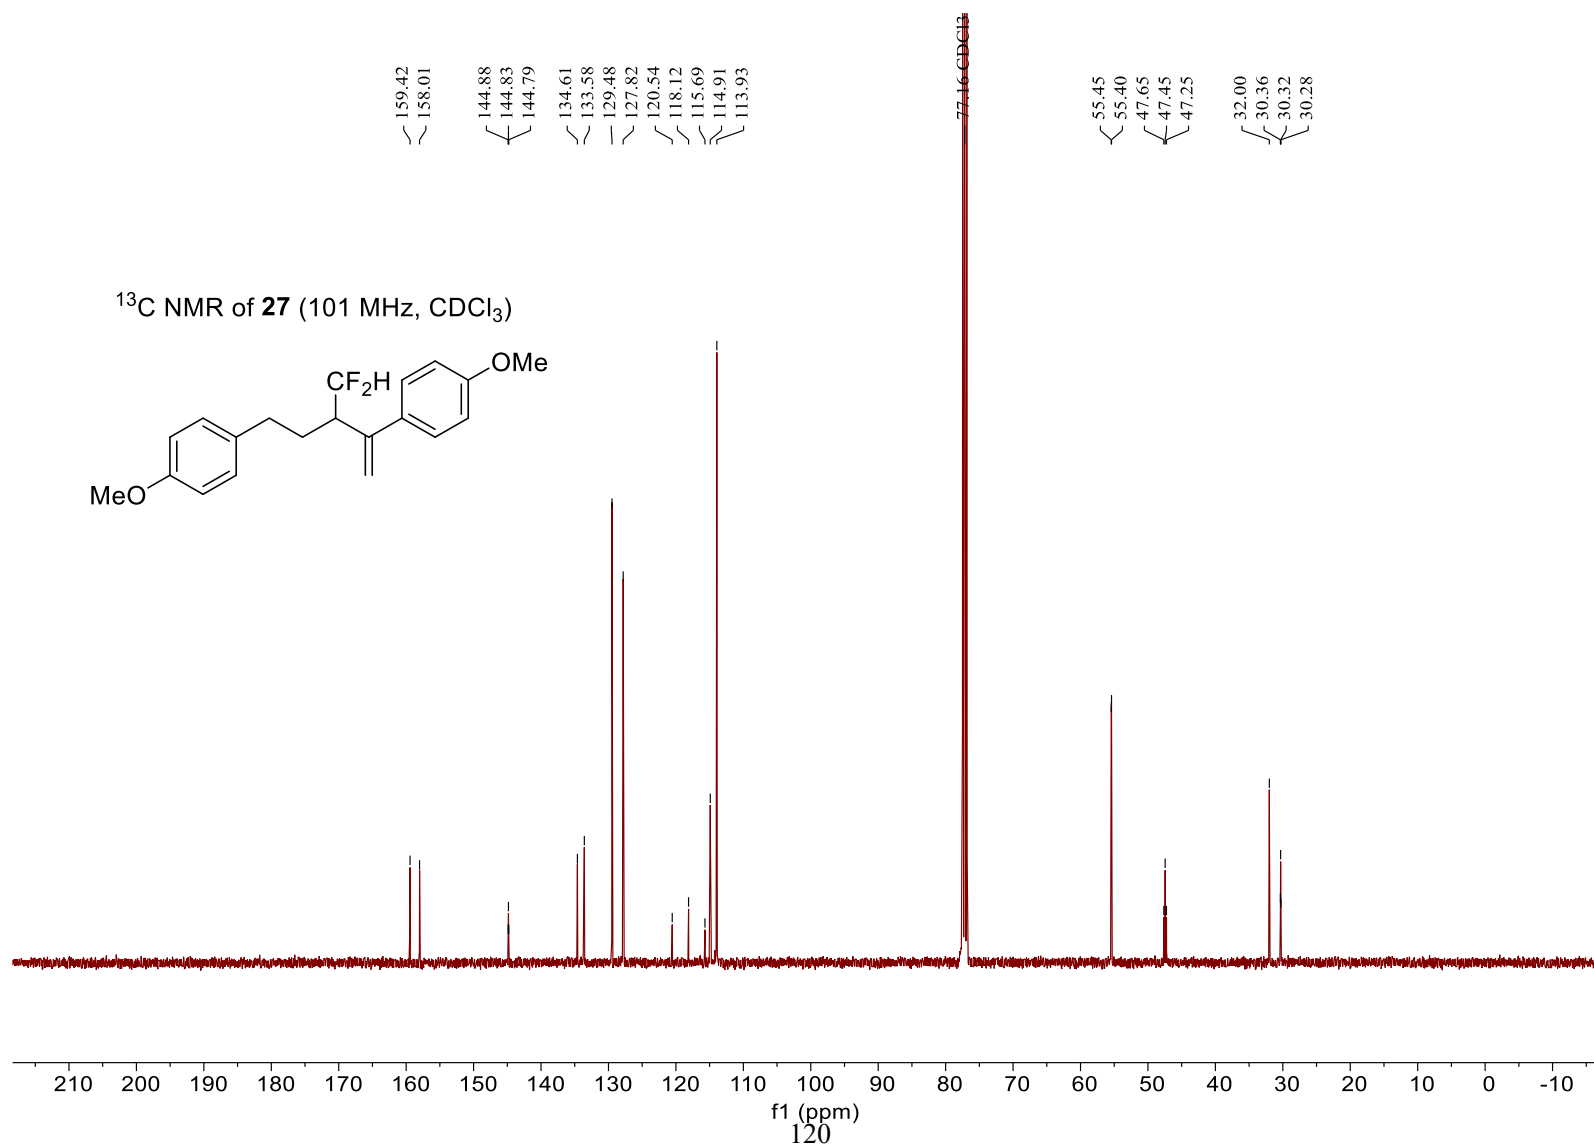

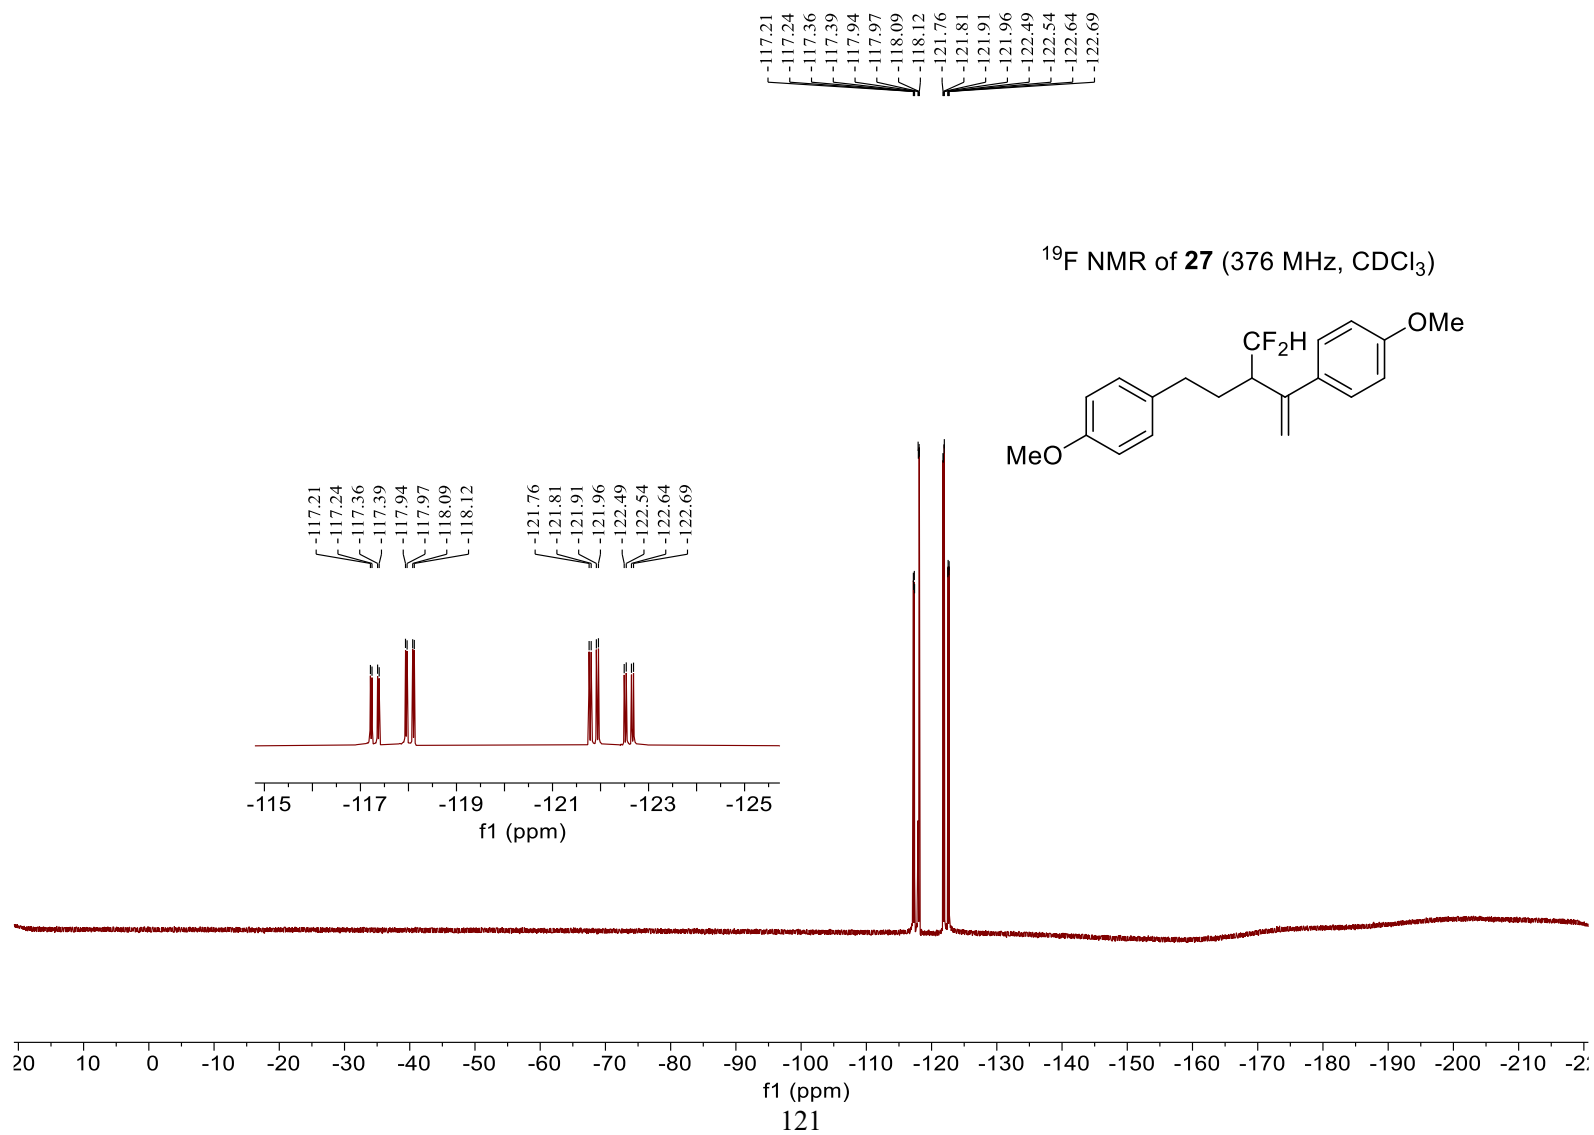

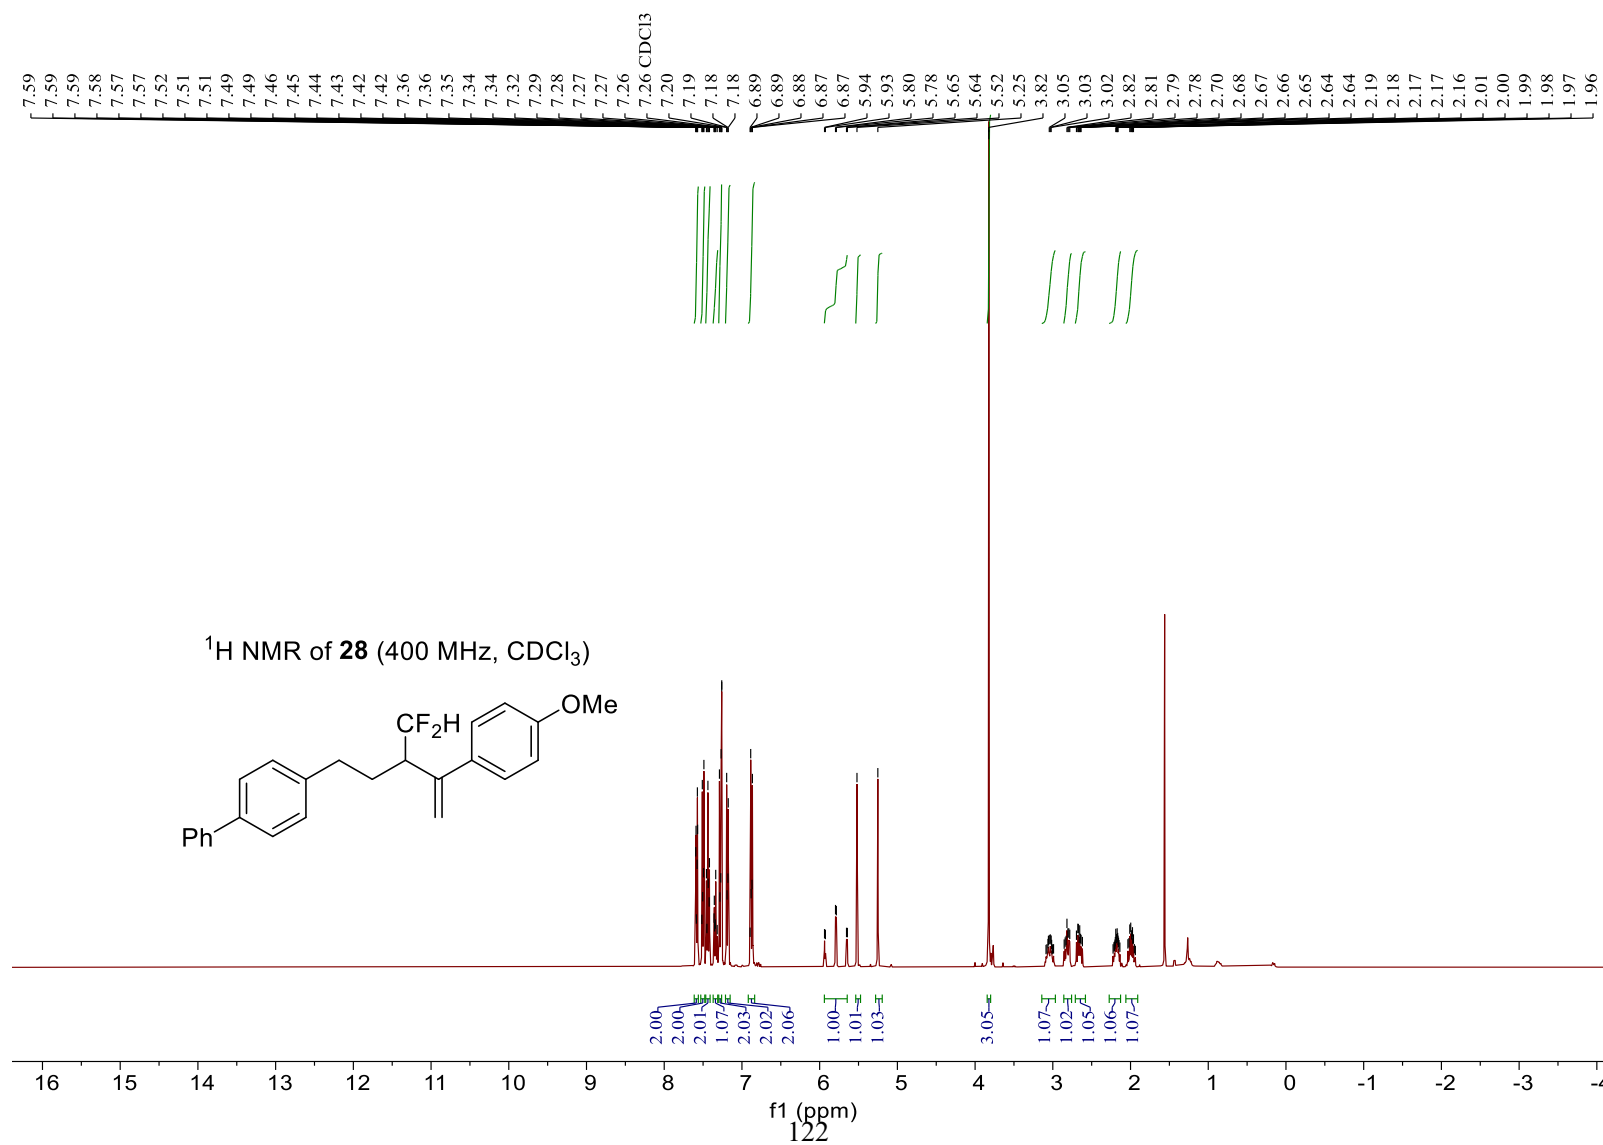

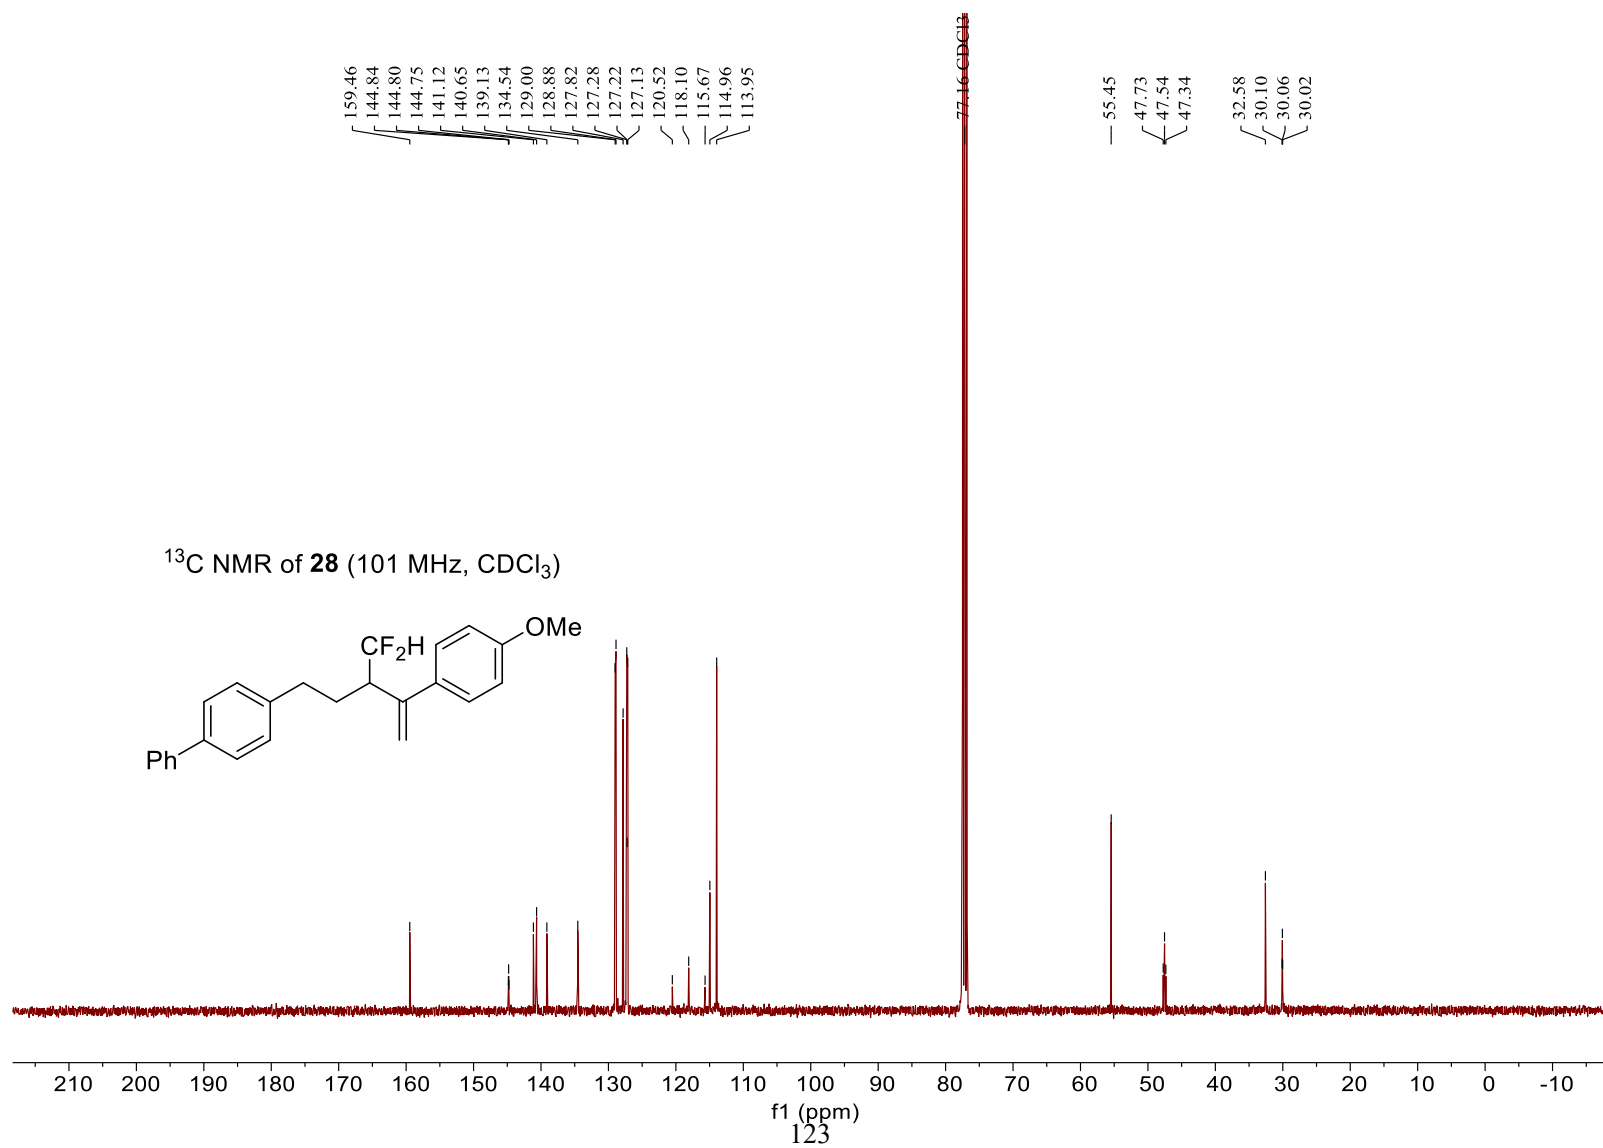

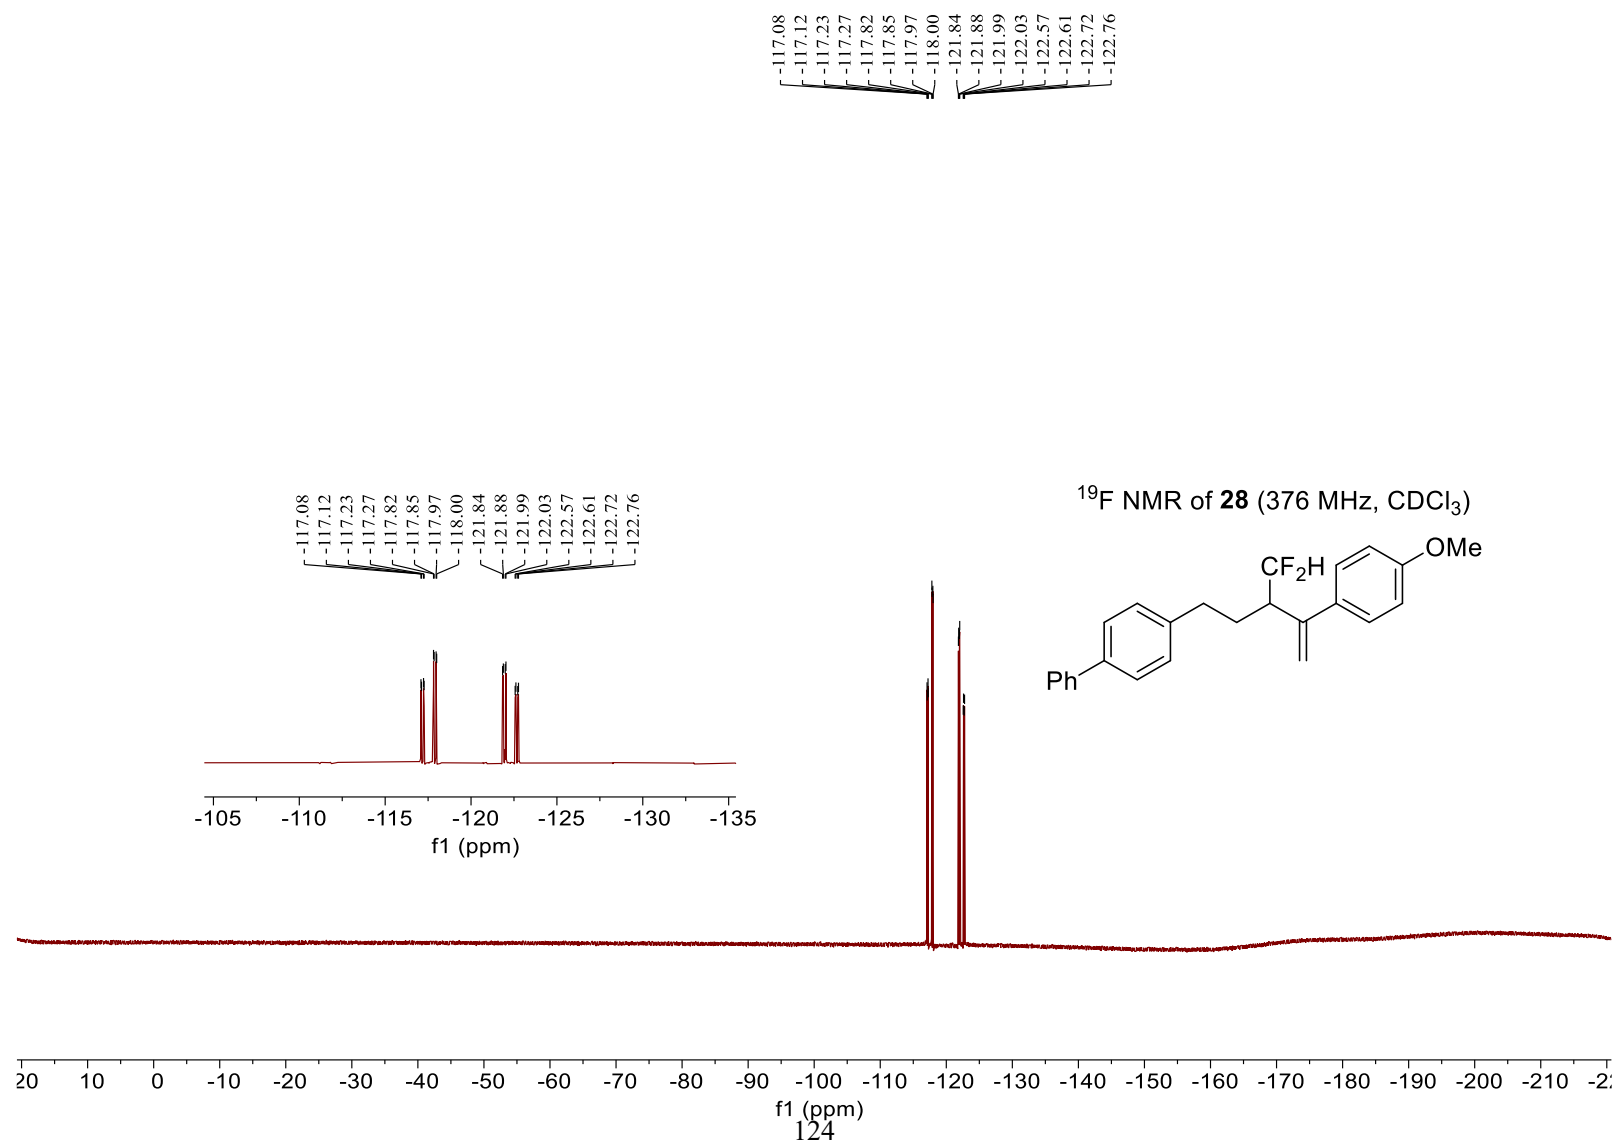



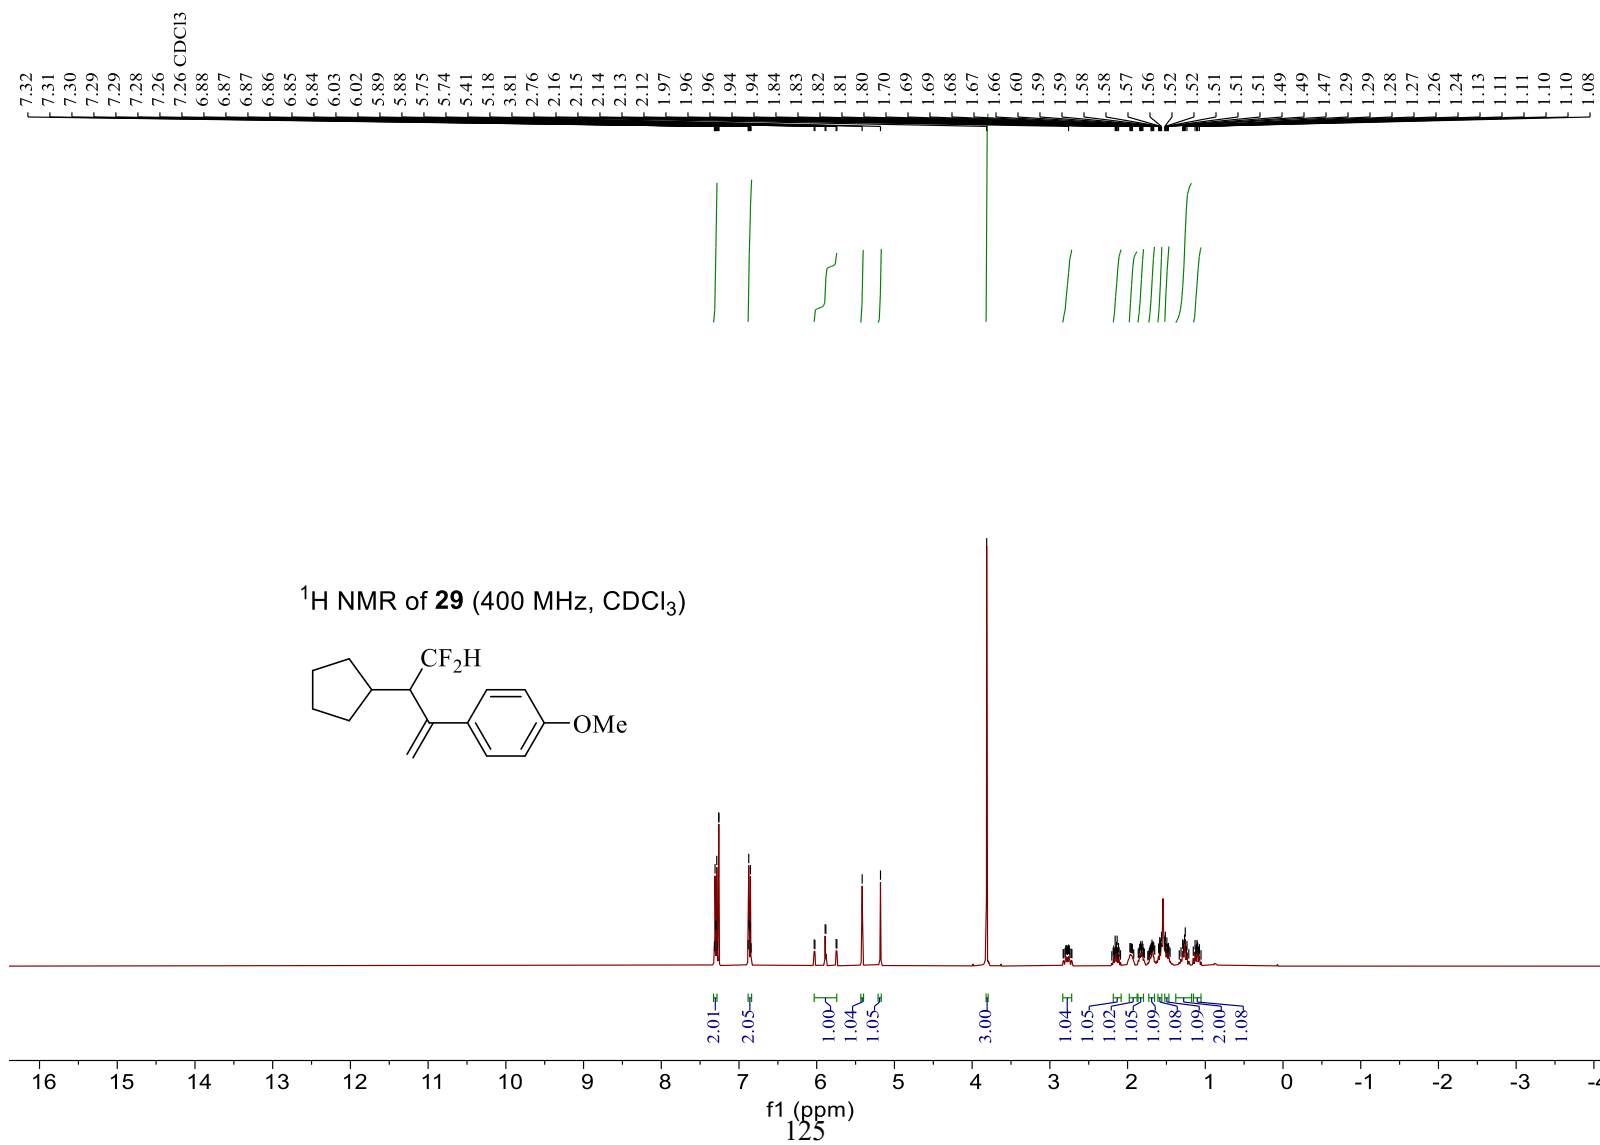

$^{13}\text{C}$  NMR of **29** (101 MHz,  $\text{CDCl}_3$ )

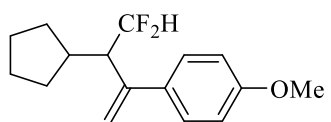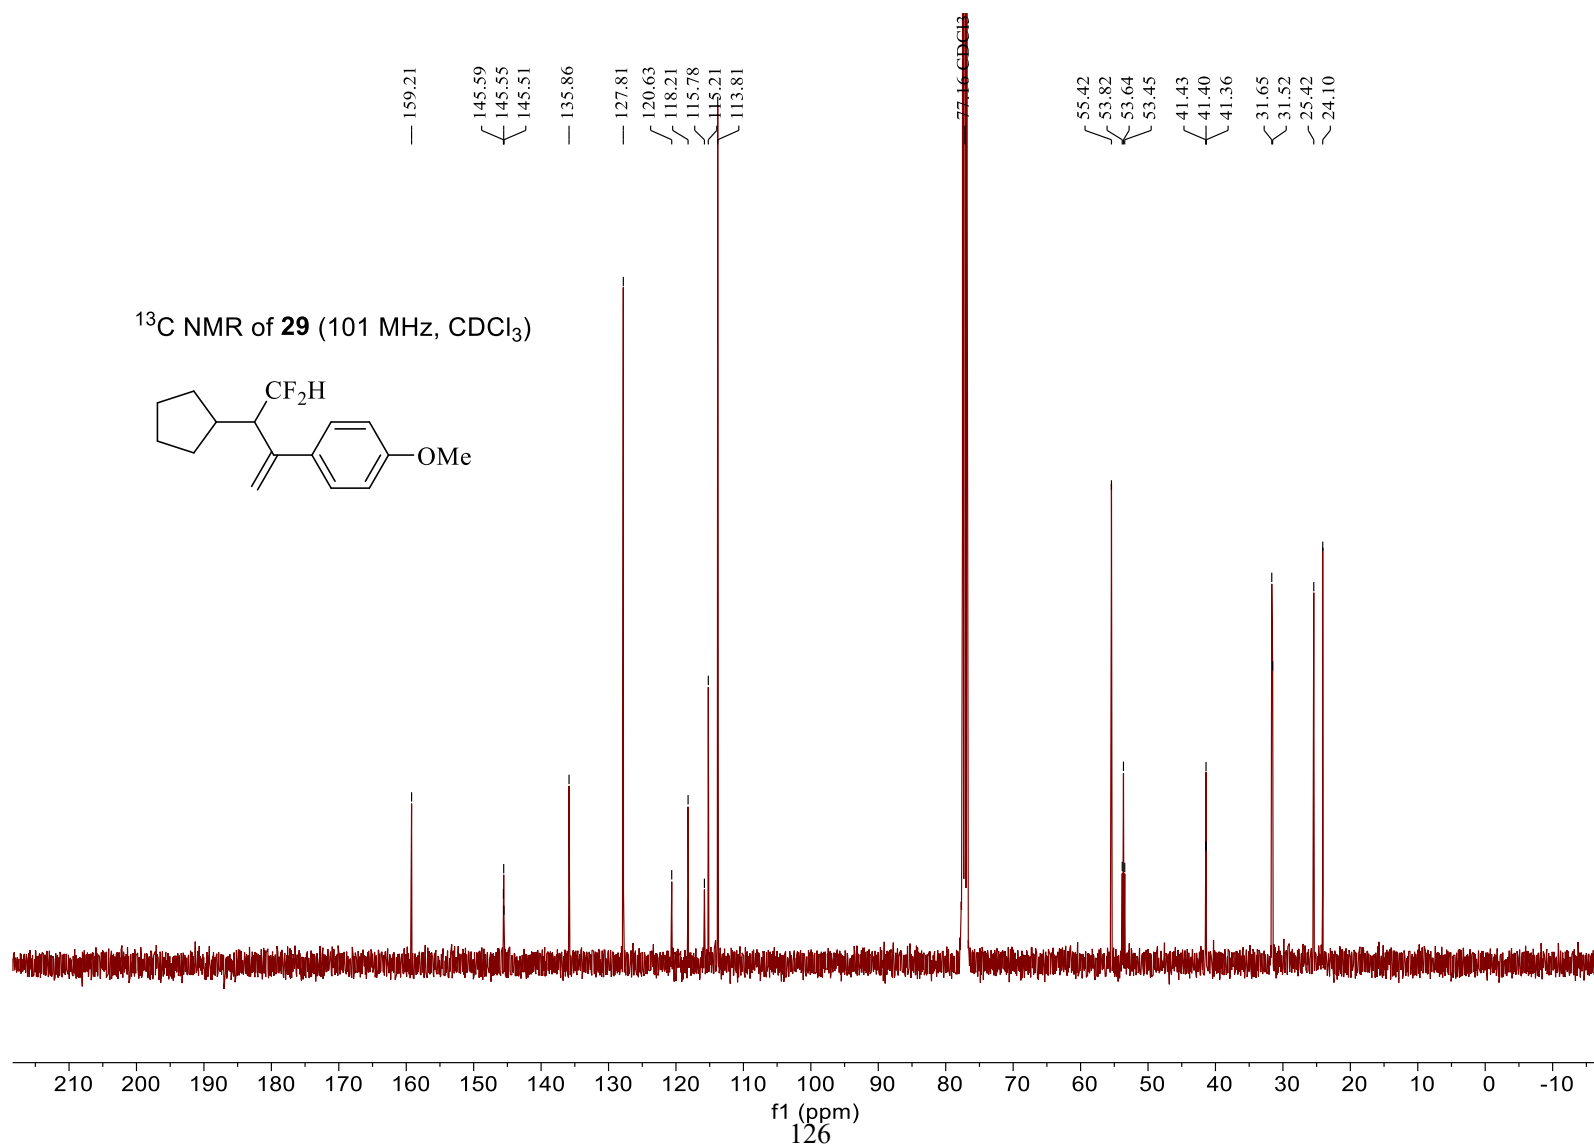

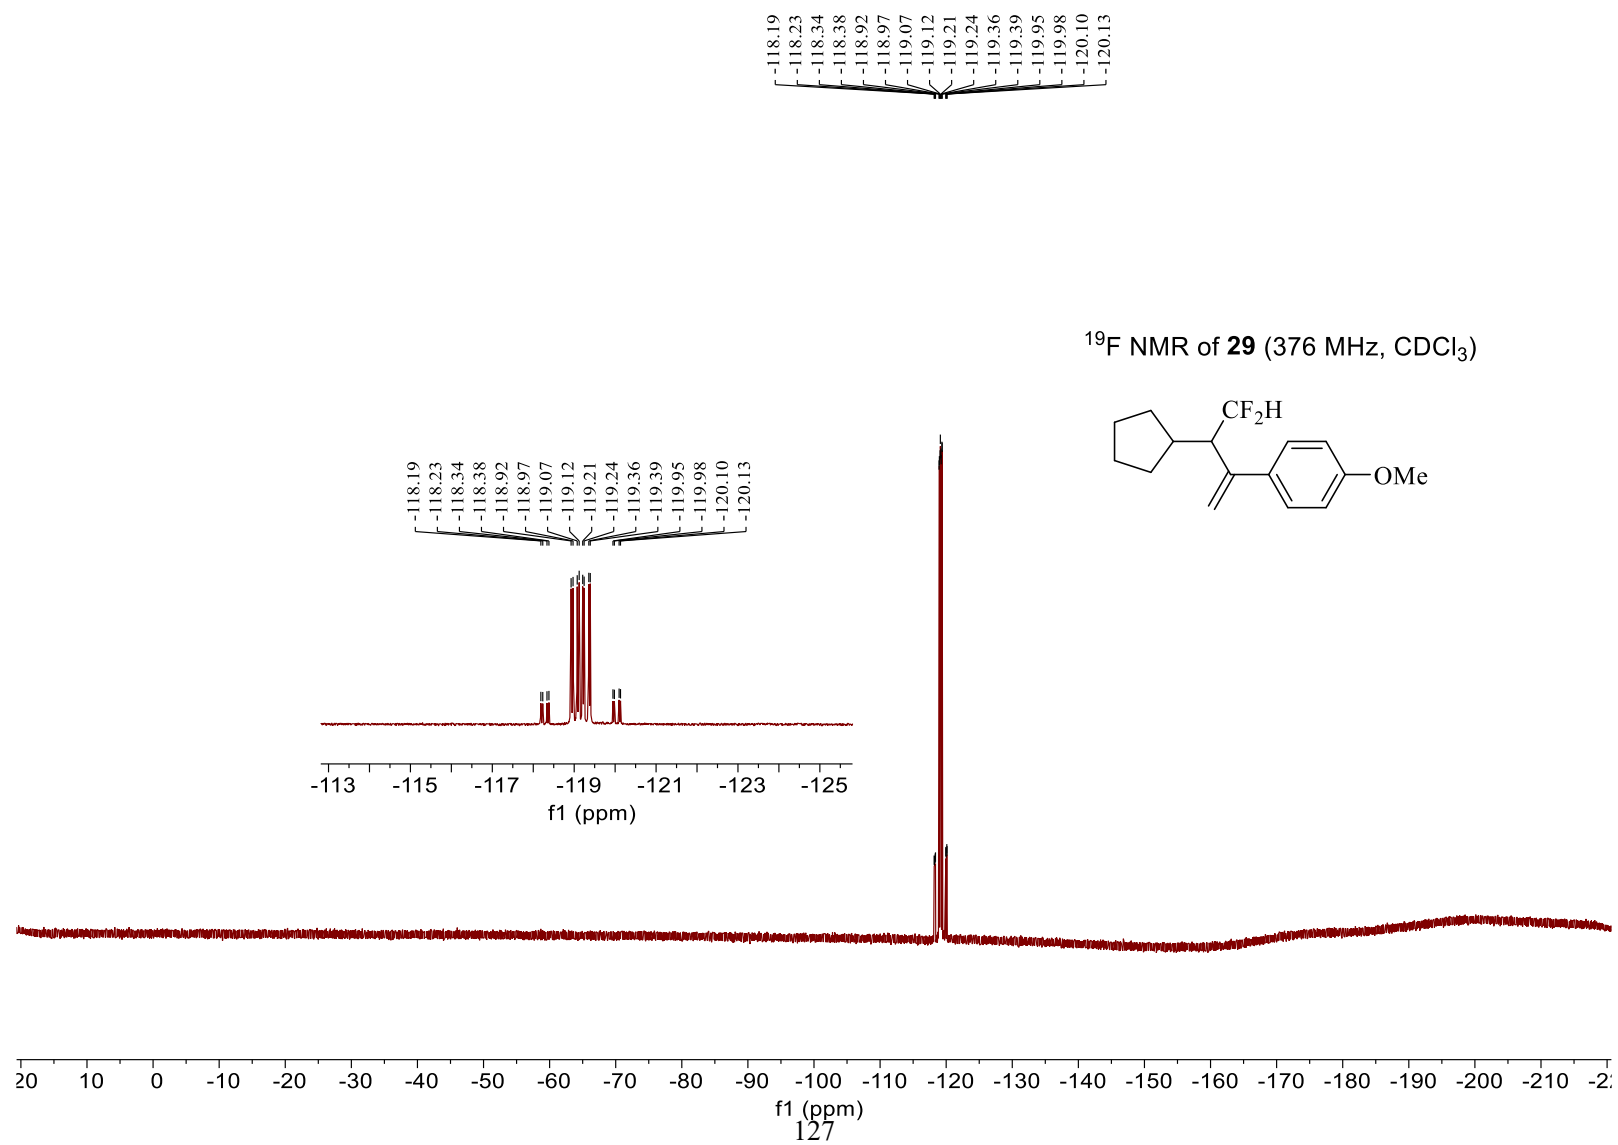

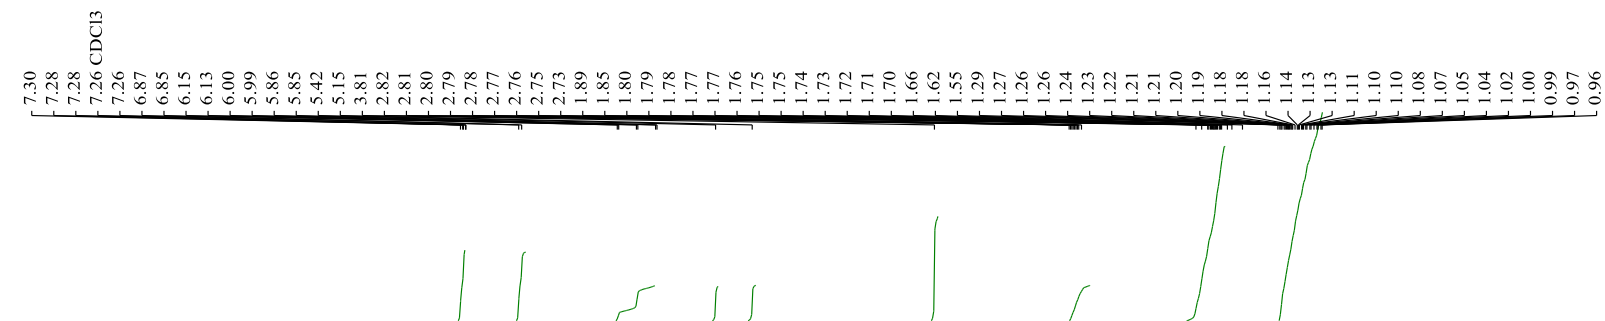

$^1\text{H}$  NMR of **30** (400 MHz,  $\text{CDCl}_3$ )

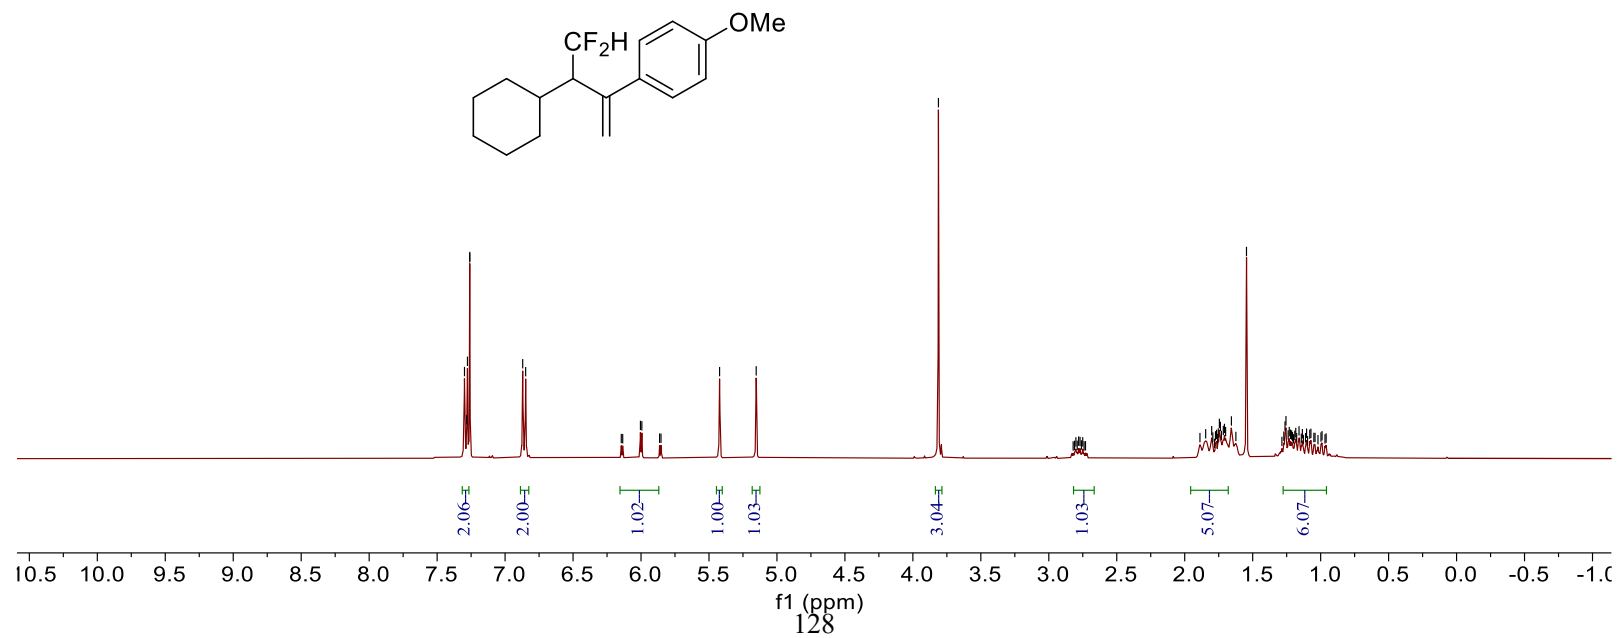

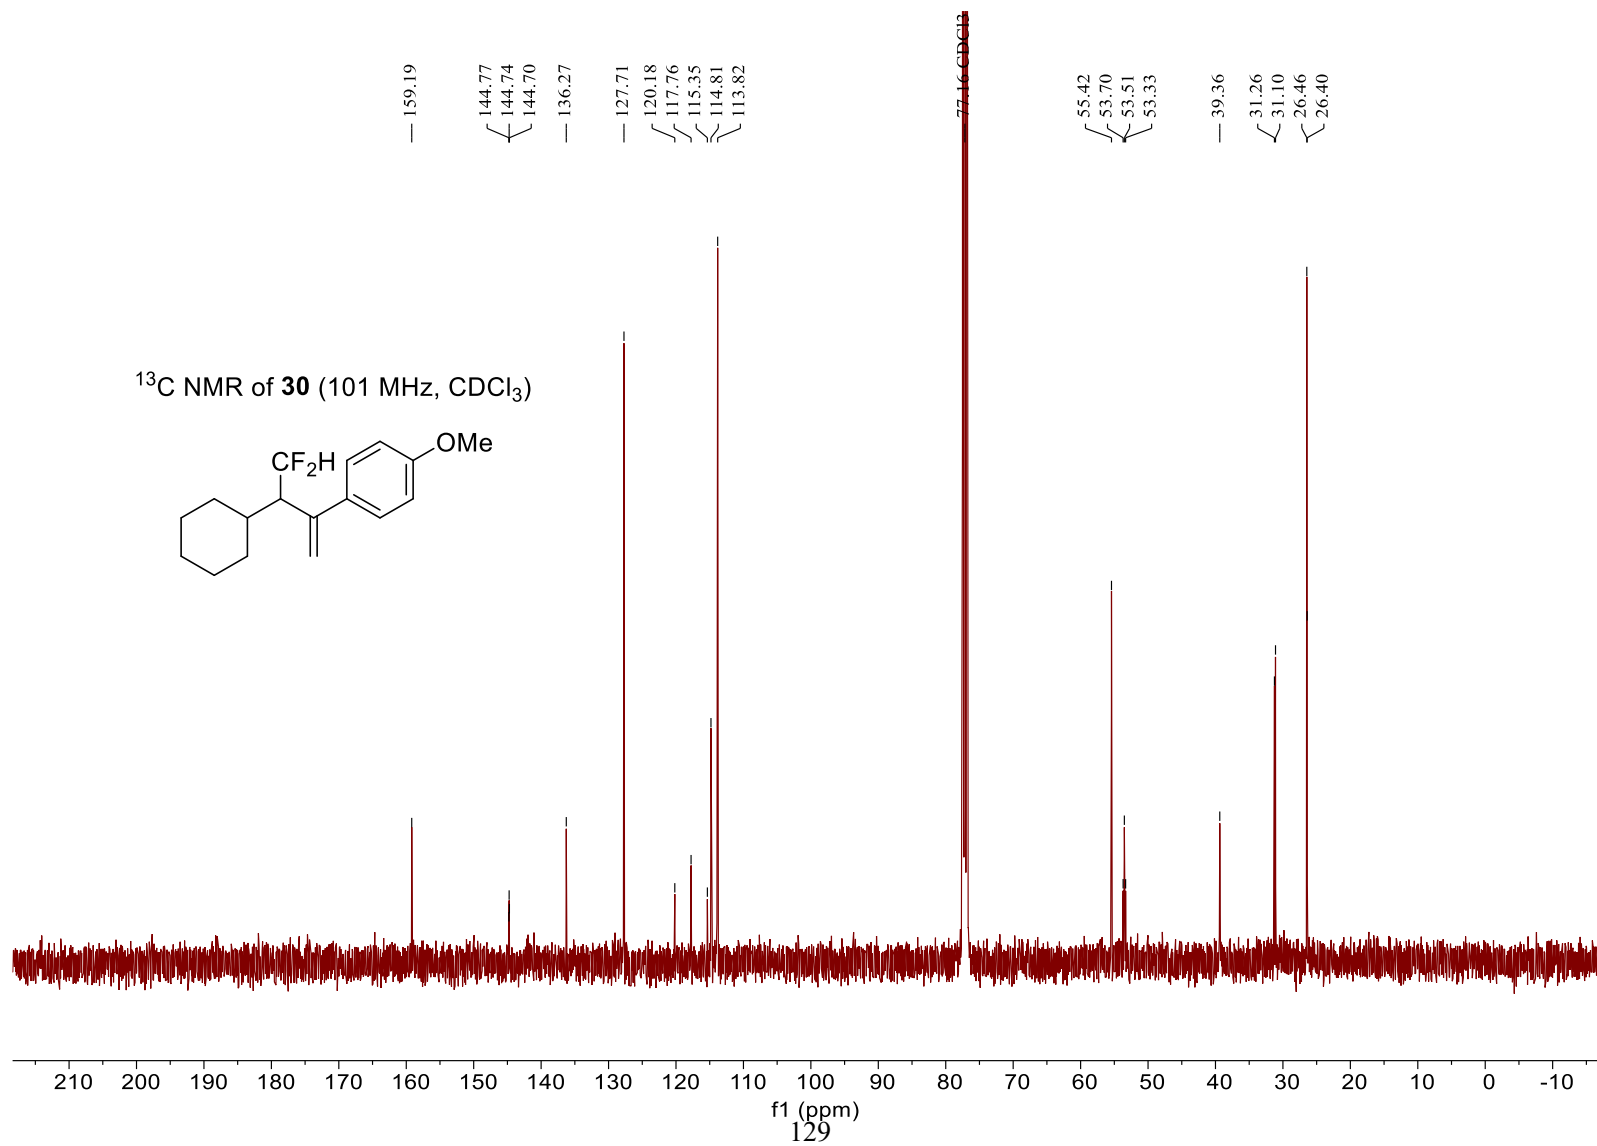

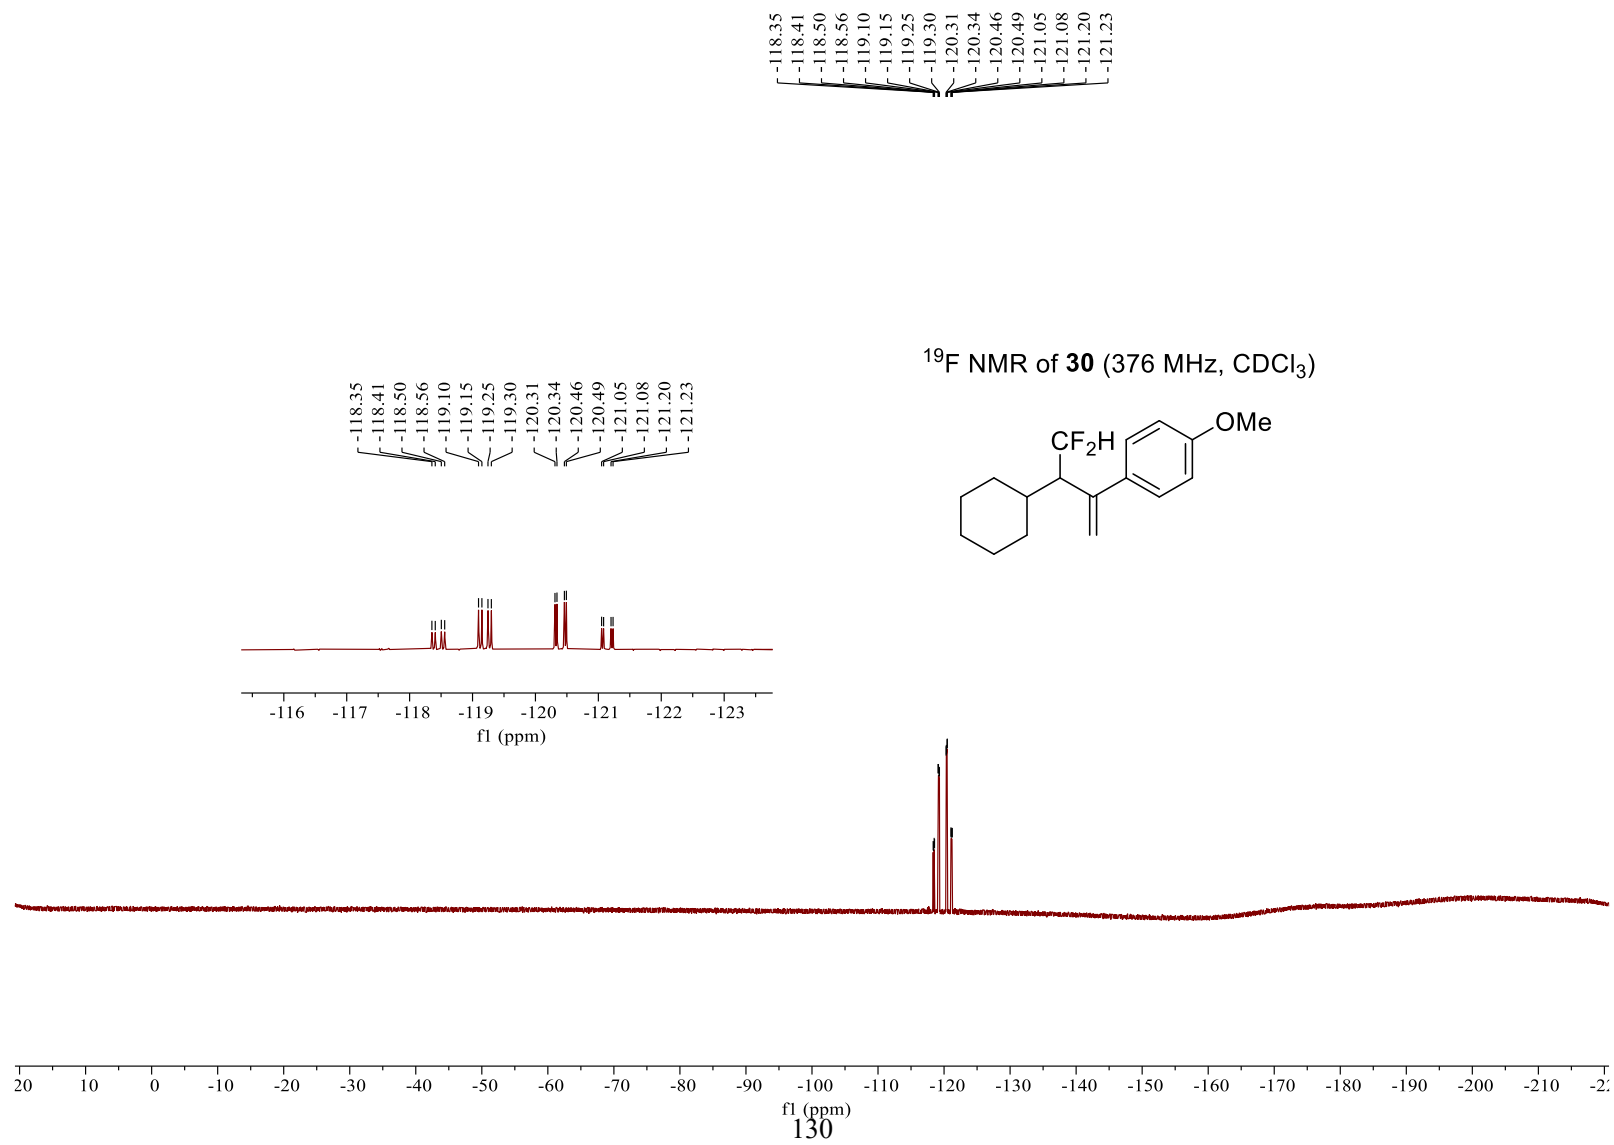

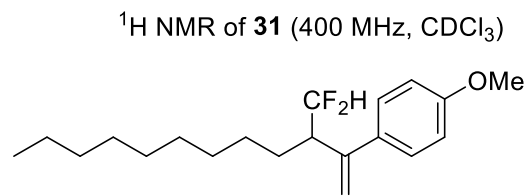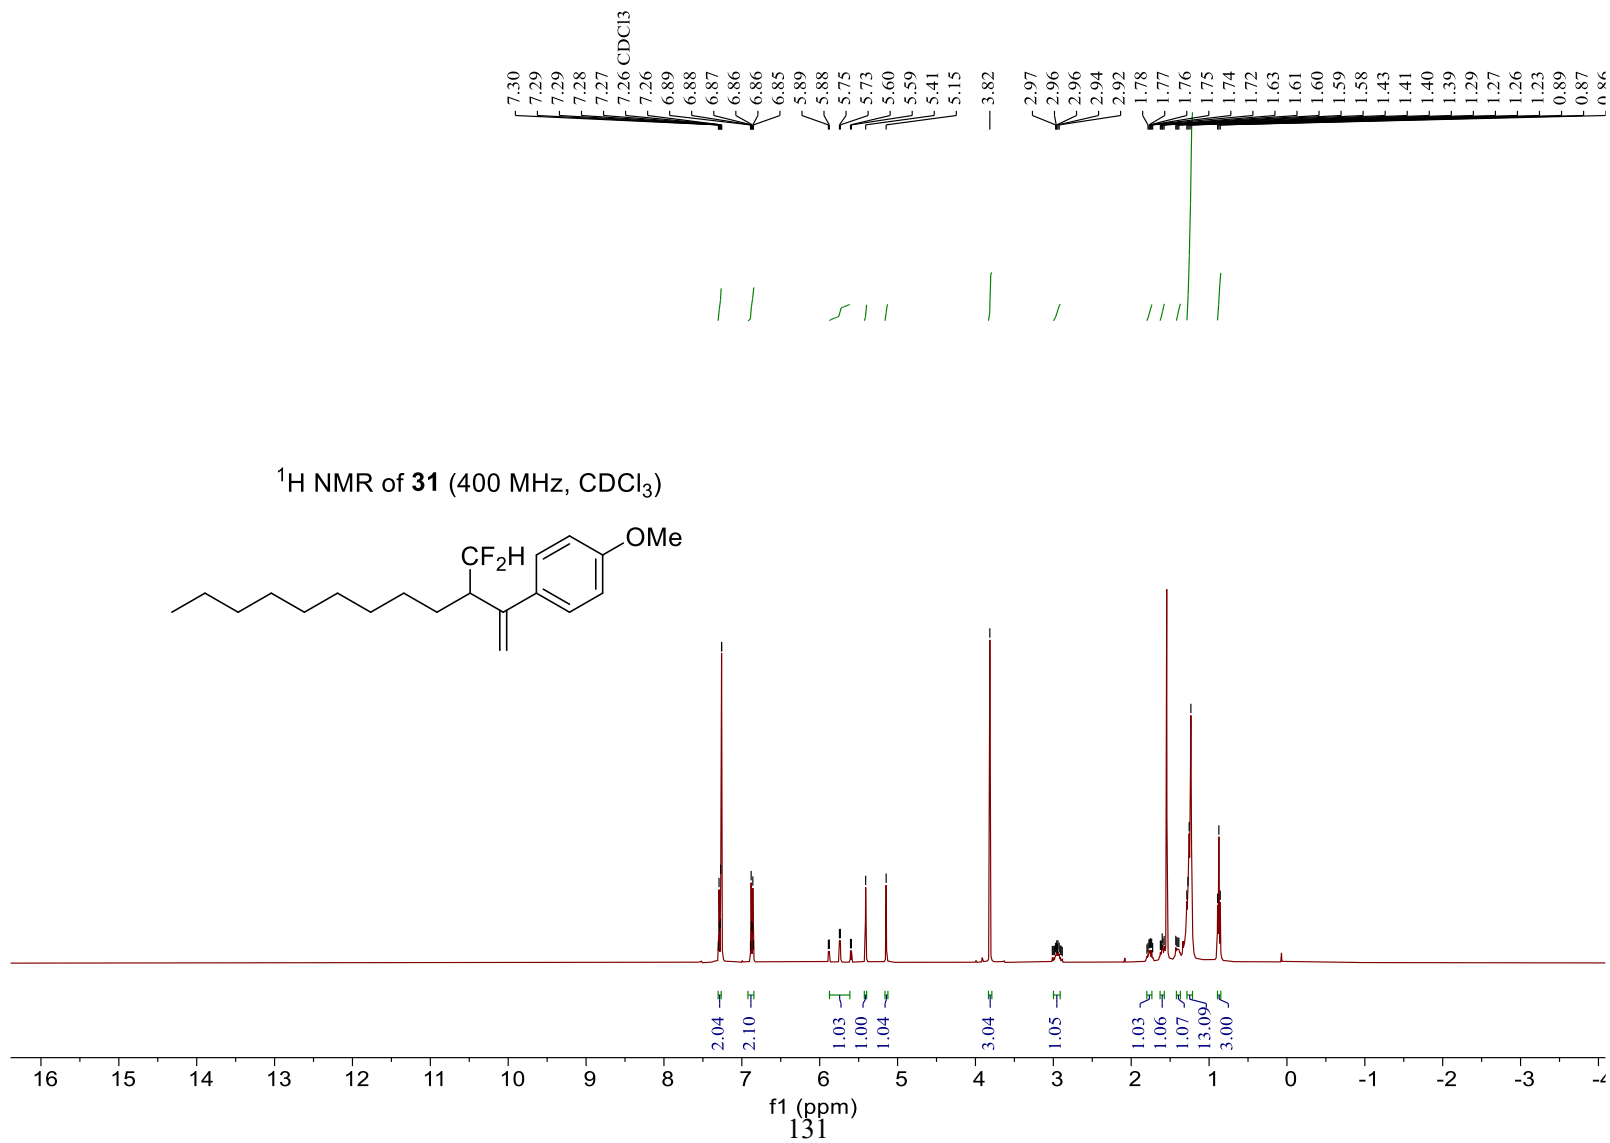

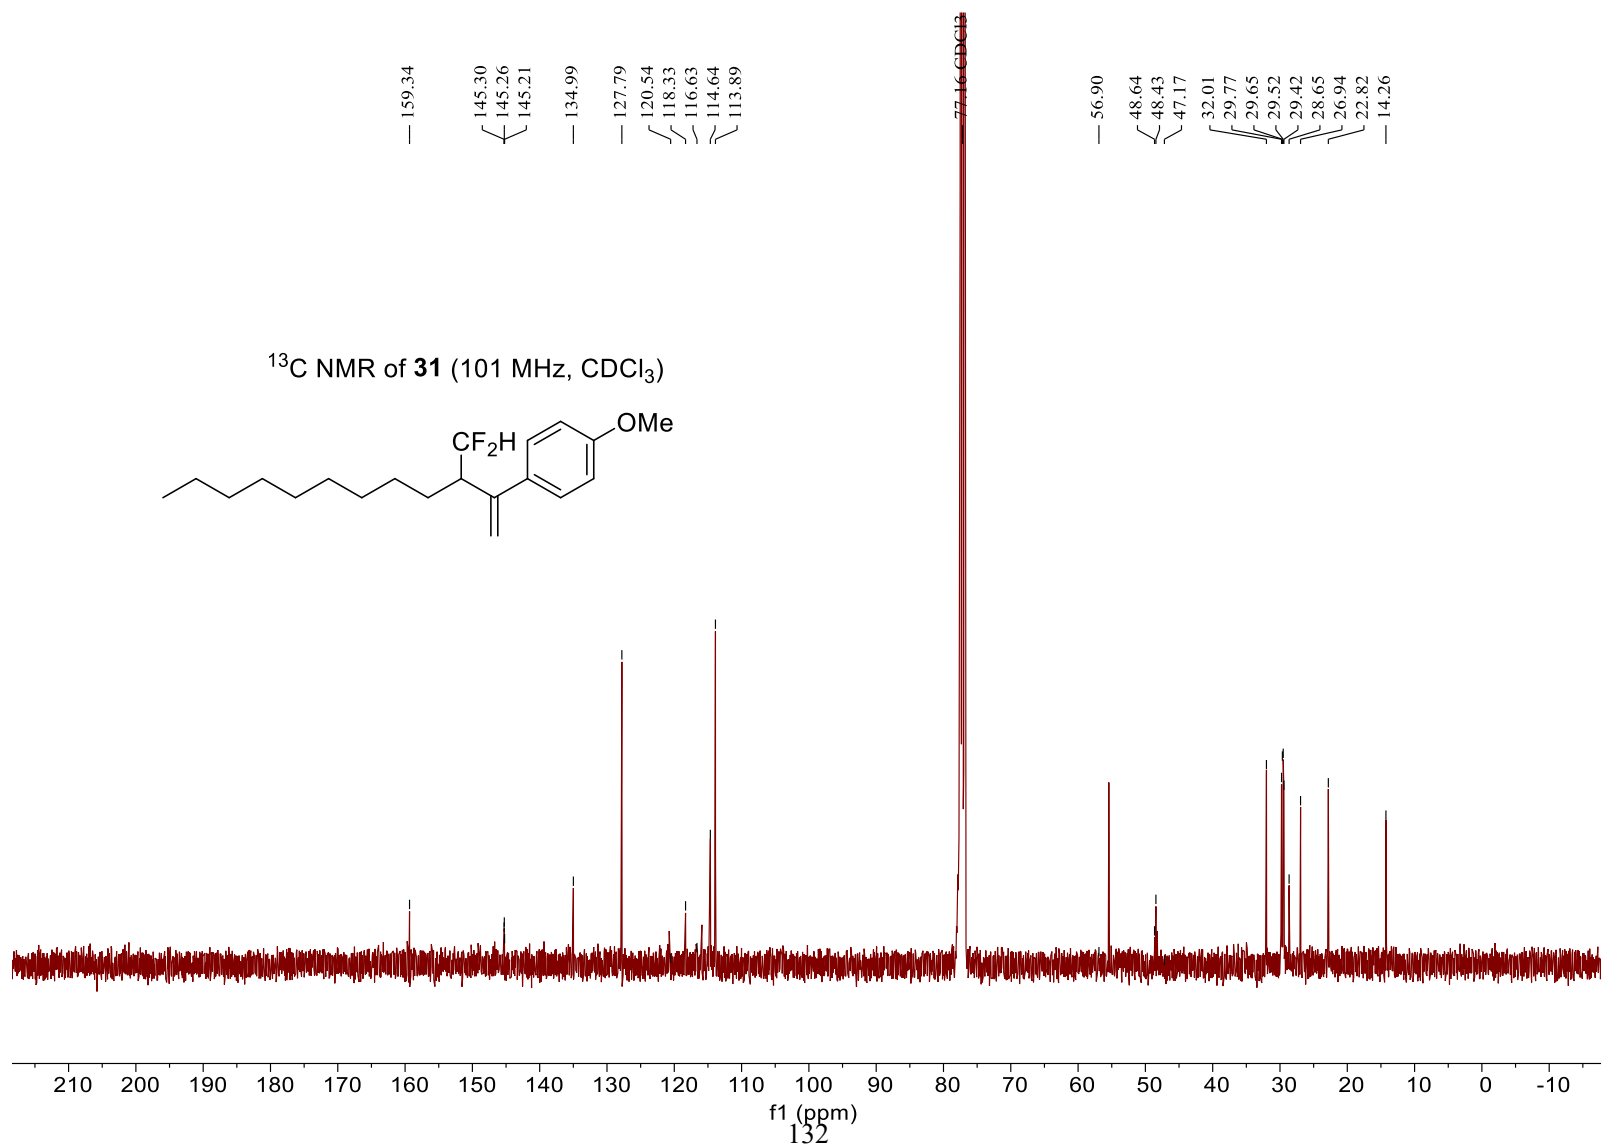



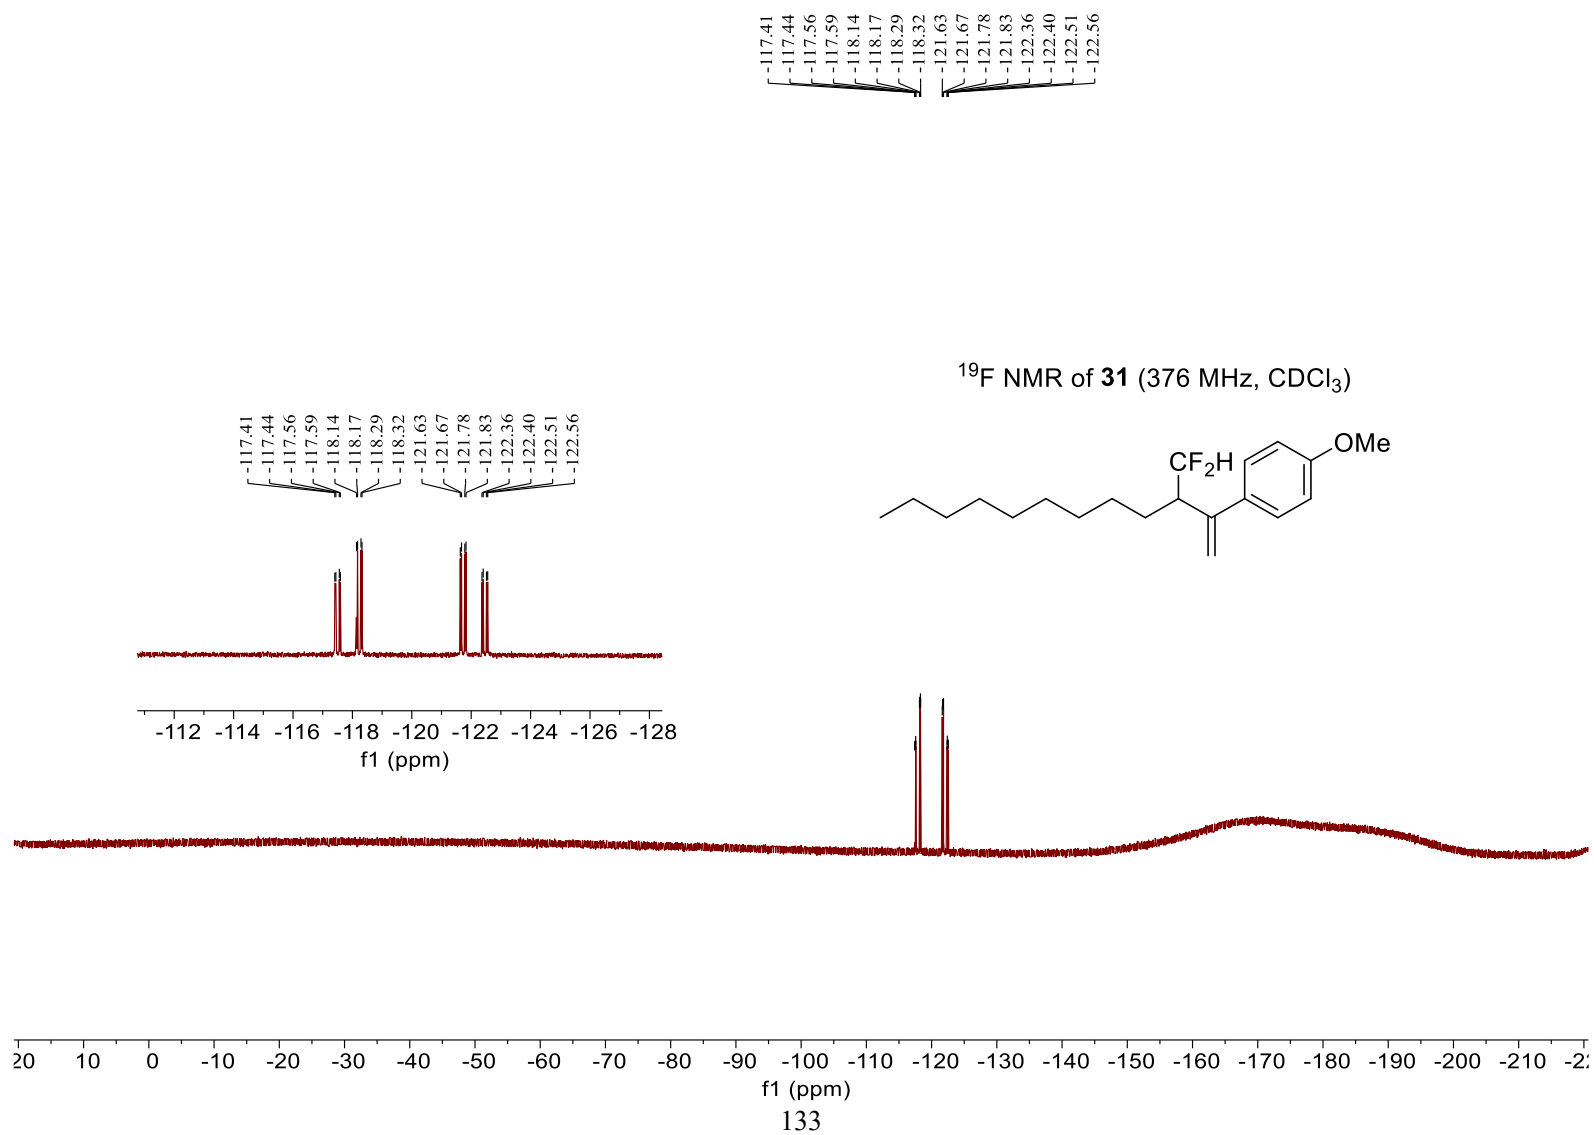

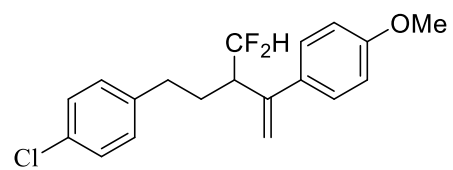

$^1\text{H}$  NMR of **32** (400 MHz,  $\text{CDCl}_3$ )

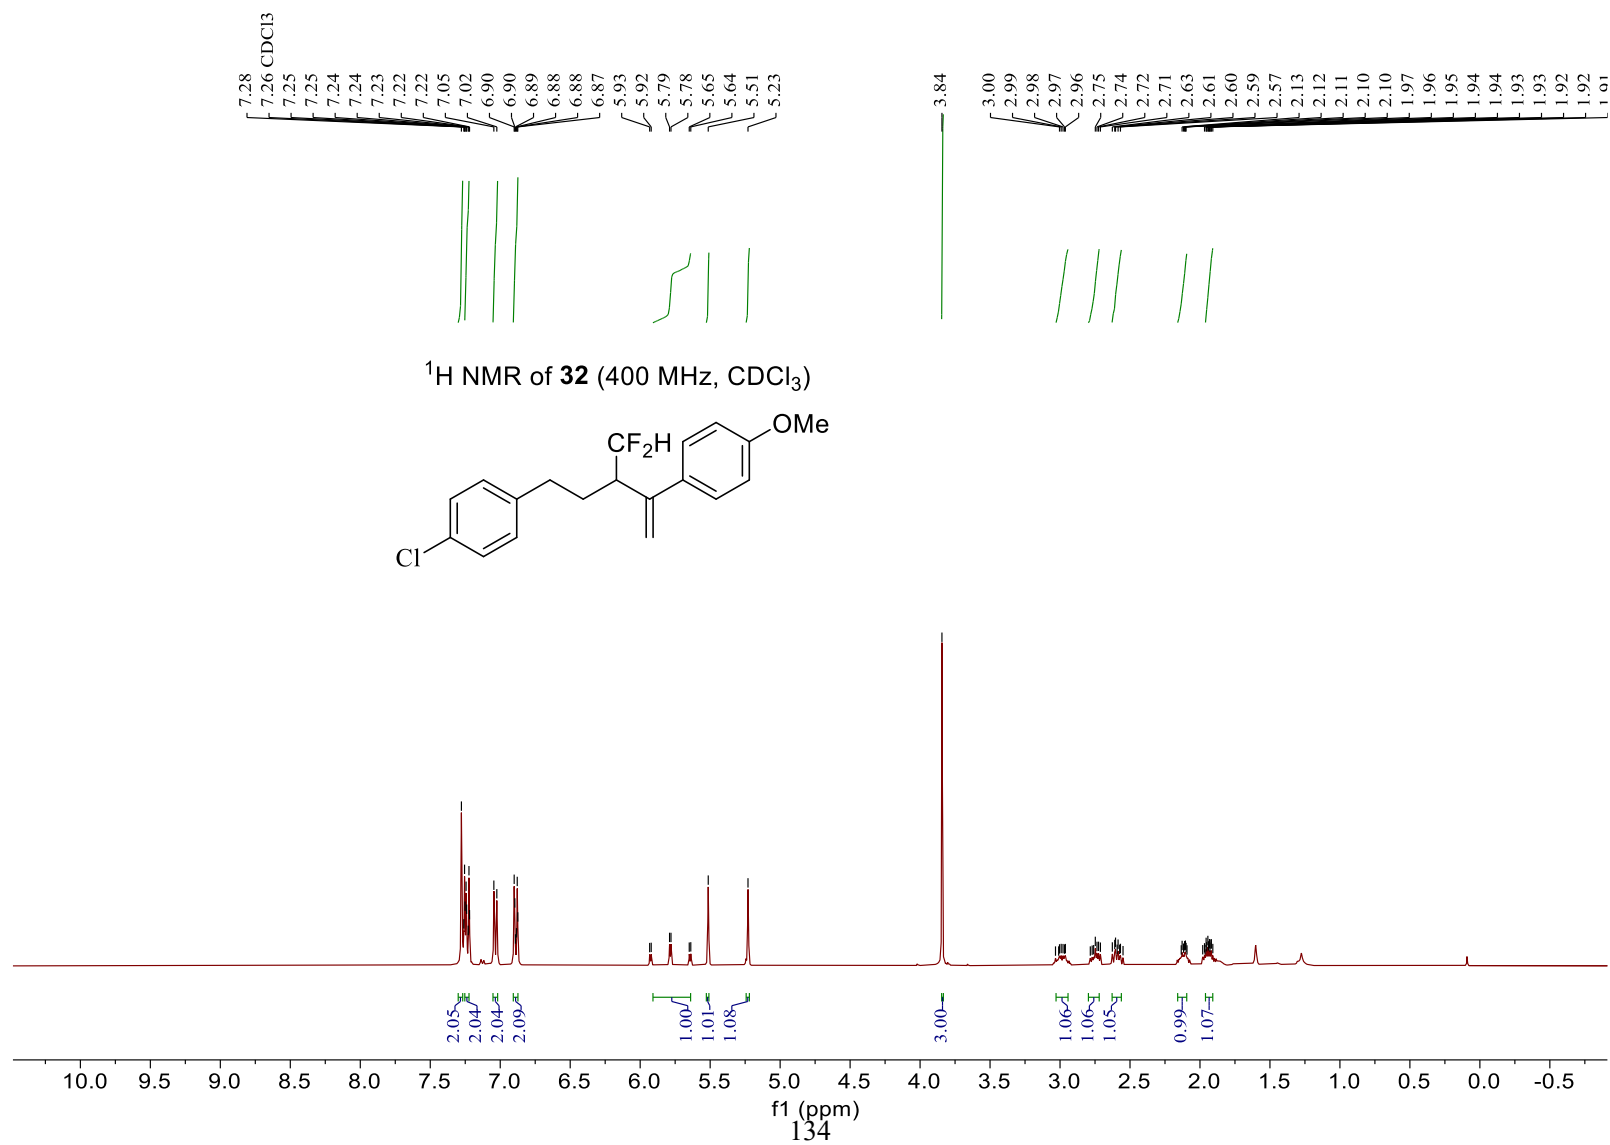

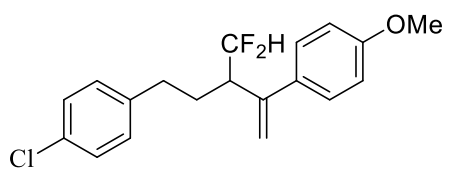

$^{13}\text{C}$  NMR of **32** (101 MHz,  $\text{CDCl}_3$ )

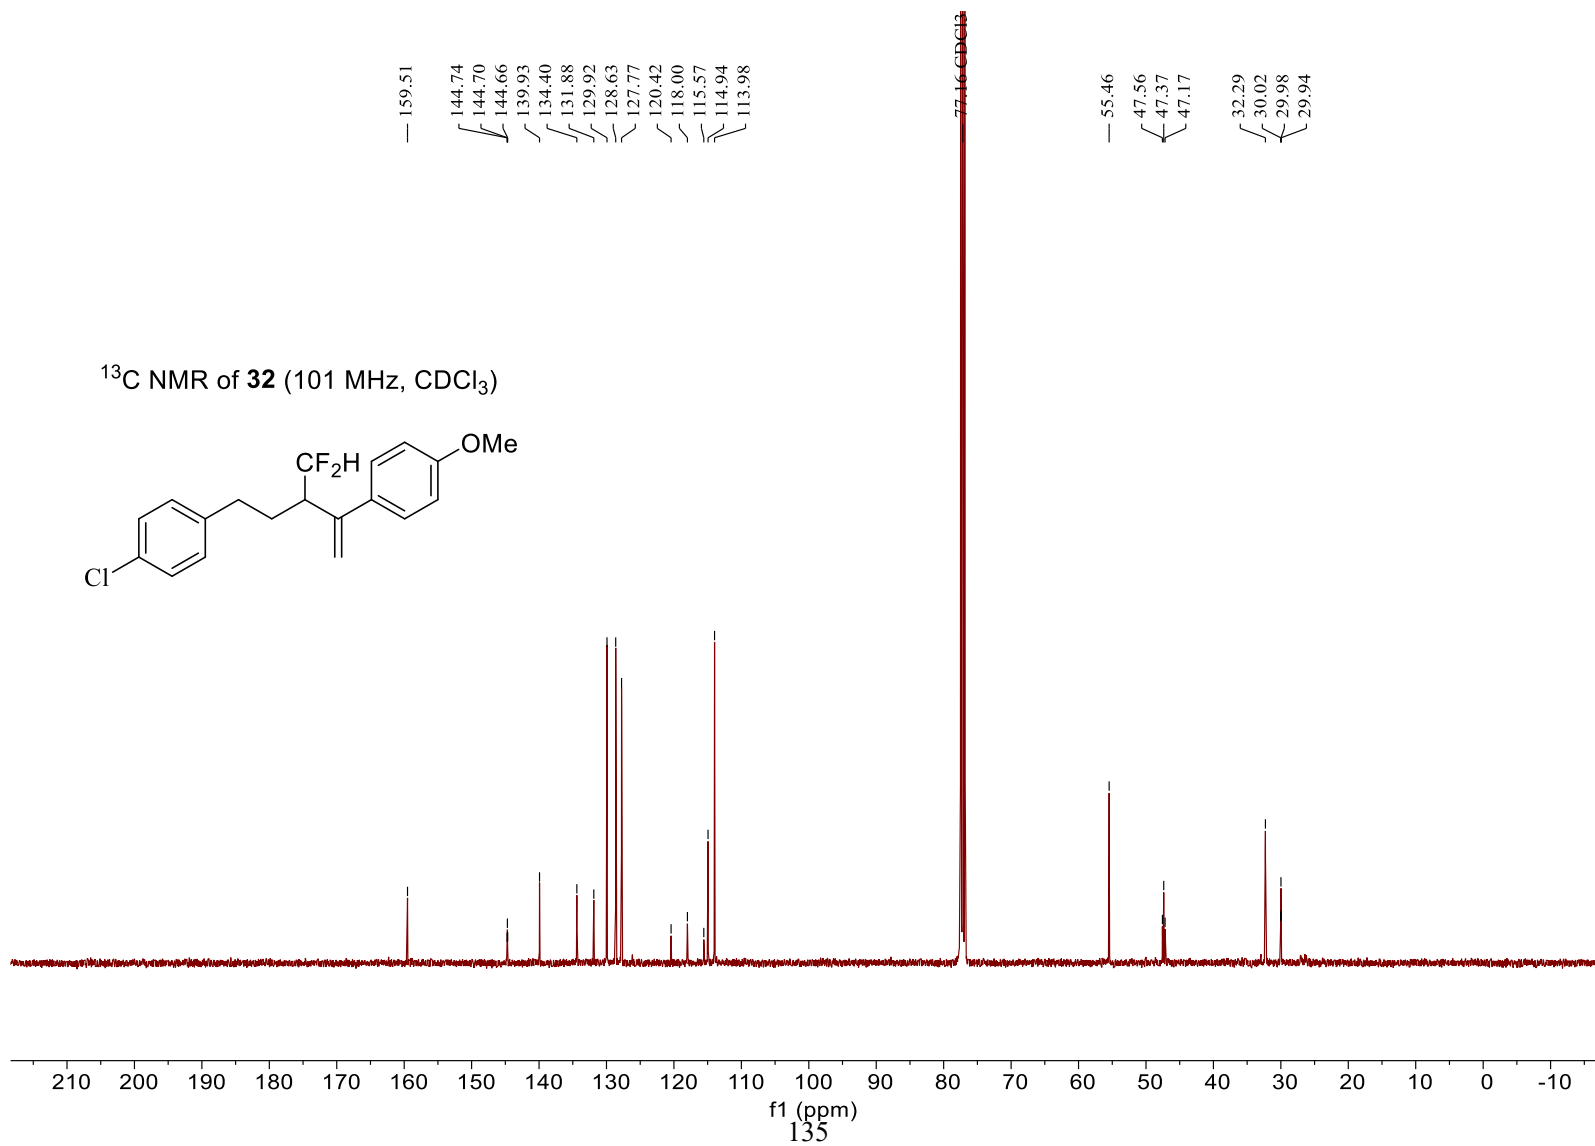

<sup>19</sup>F NMR of **32** (376 MHz, CDCl<sub>3</sub>)

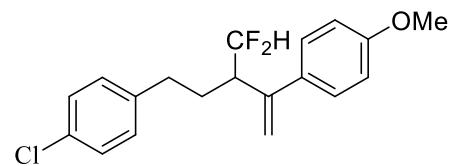

-116.91  
-116.95  
-117.06  
-117.10  
-117.65  
-117.68  
-117.80  
-117.83  
-122.05  
-122.09  
-122.20  
-122.24  
-122.78  
-122.82  
-122.93  
-122.97

-116.91  
-116.95  
-117.06  
-117.10  
-117.65  
-117.68  
-117.80  
-117.83

-122.05  
-122.09  
-122.20  
-122.24  
-122.78  
-122.82  
-122.93  
-122.97

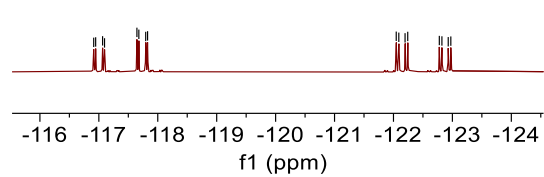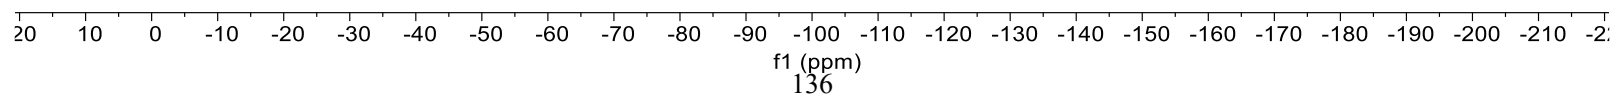

136

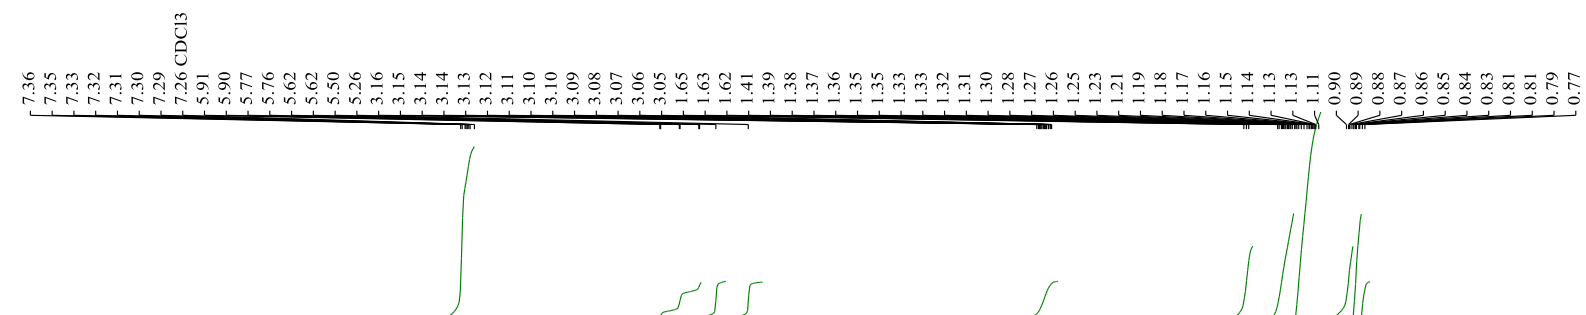

$^1\text{H}$  NMR of **33** (400 MHz,  $\text{CDCl}_3$ )

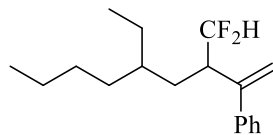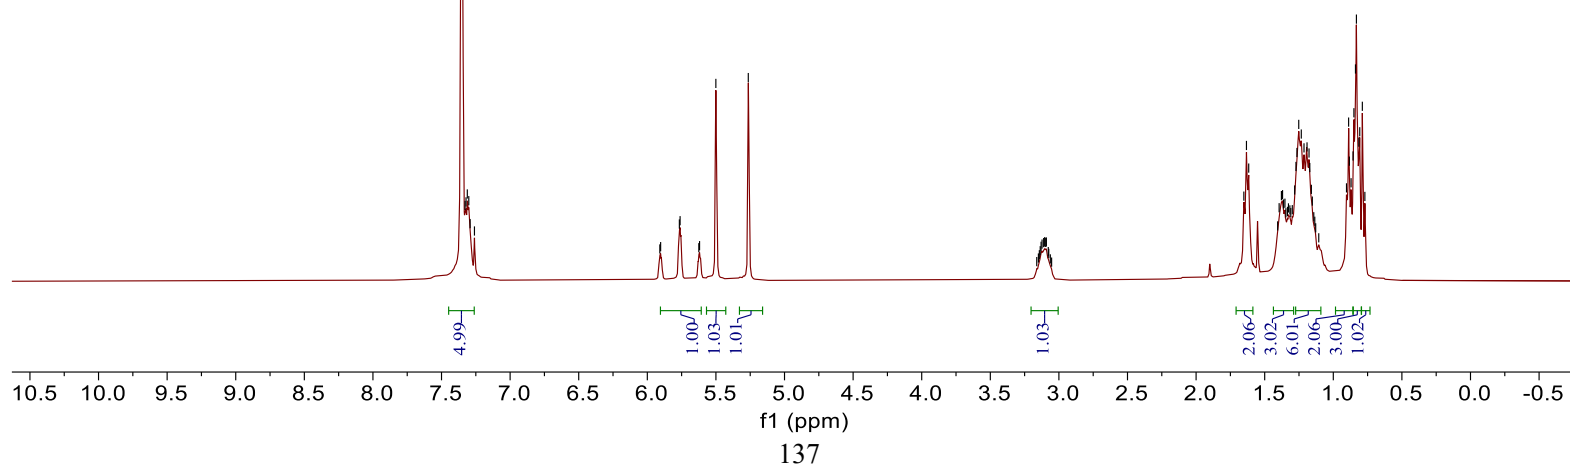

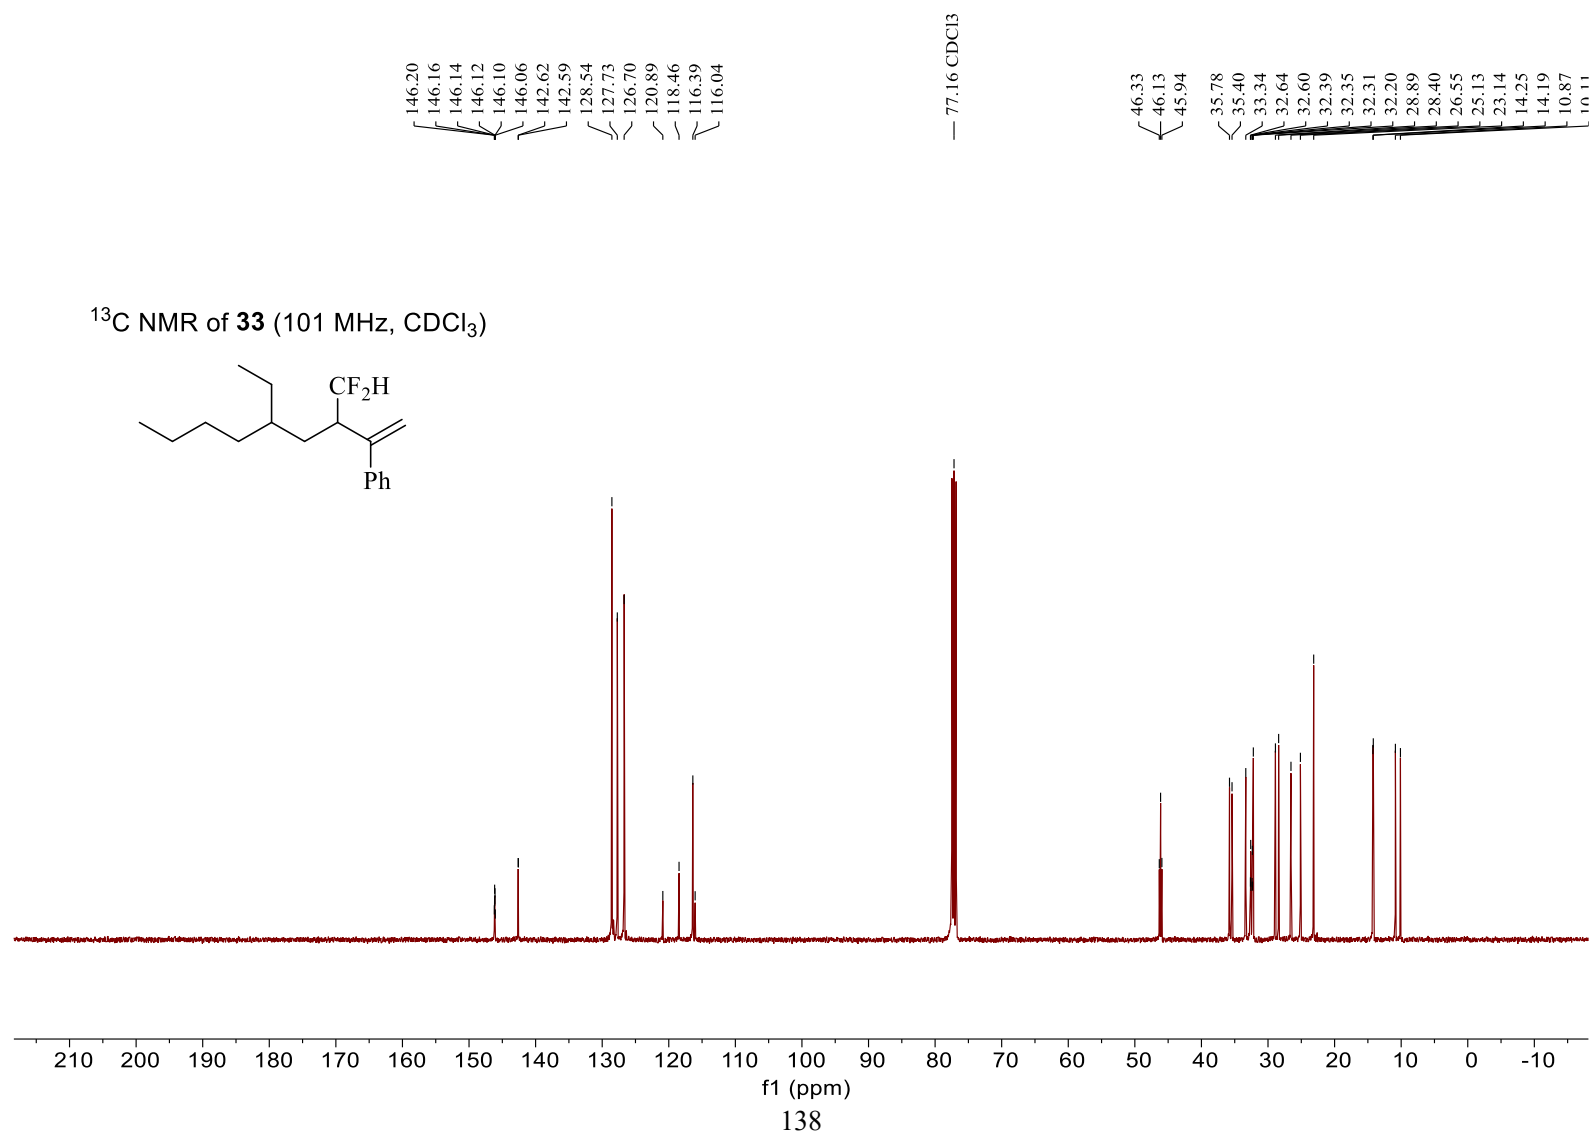

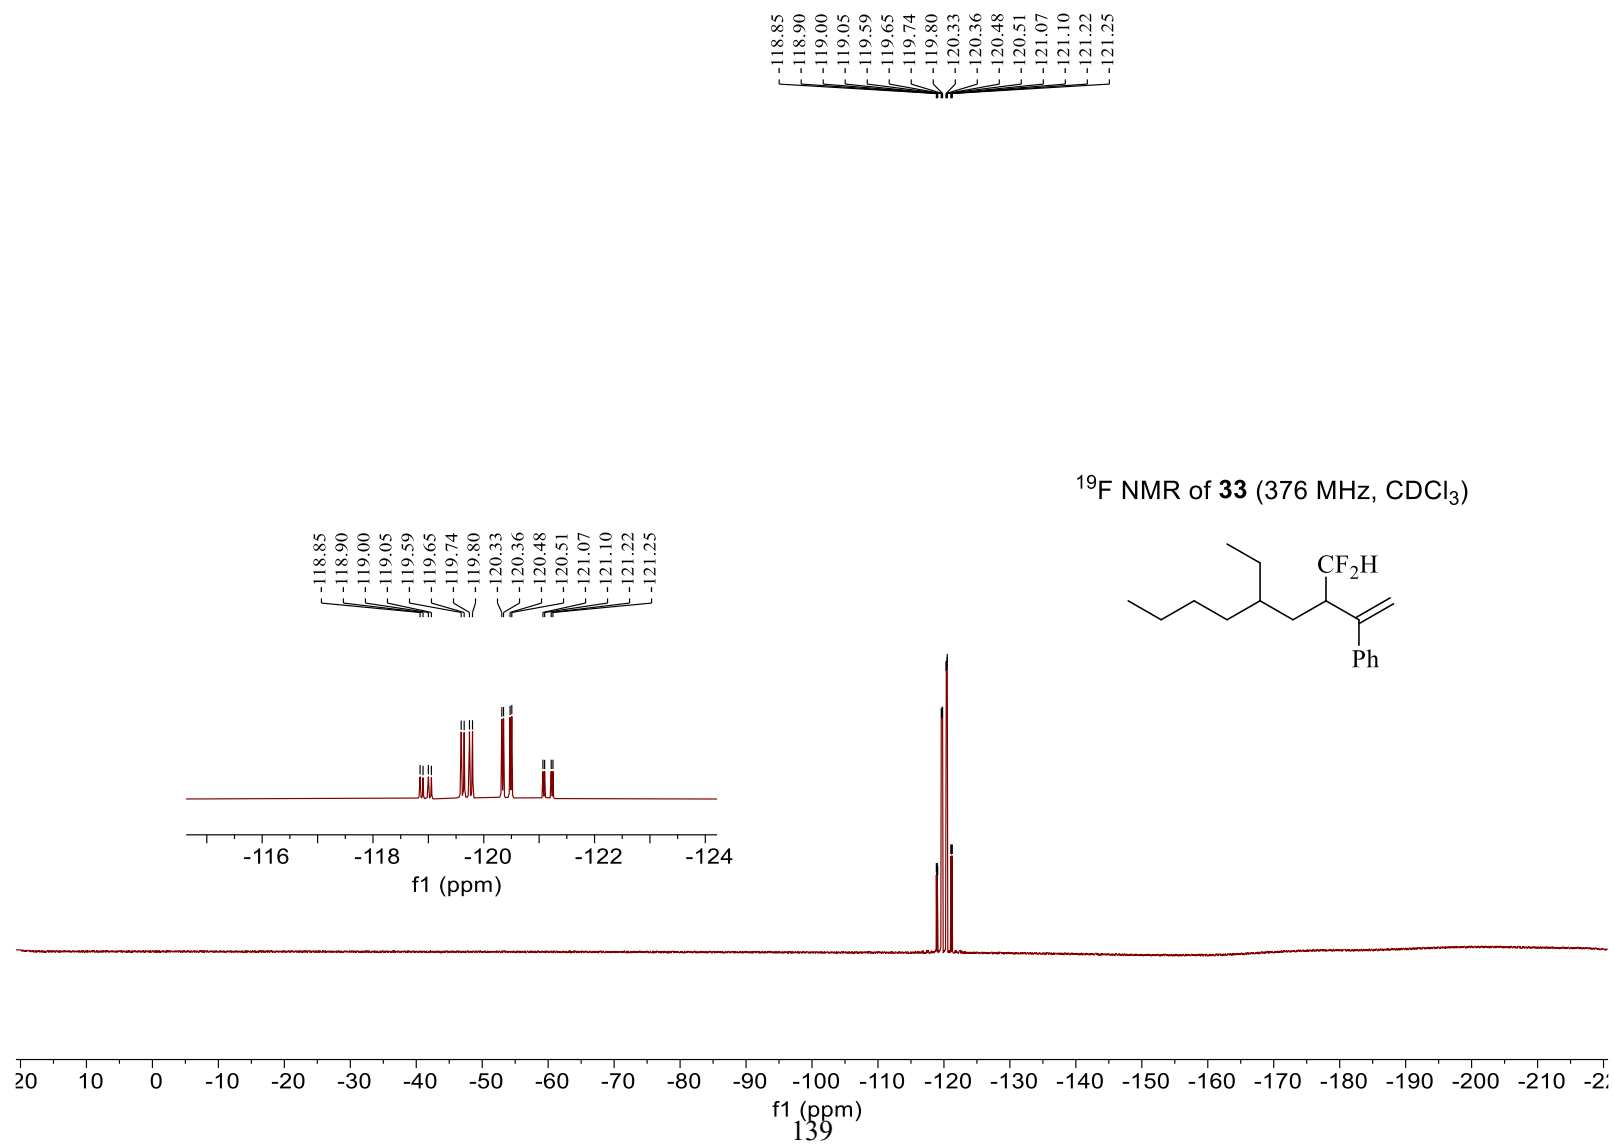

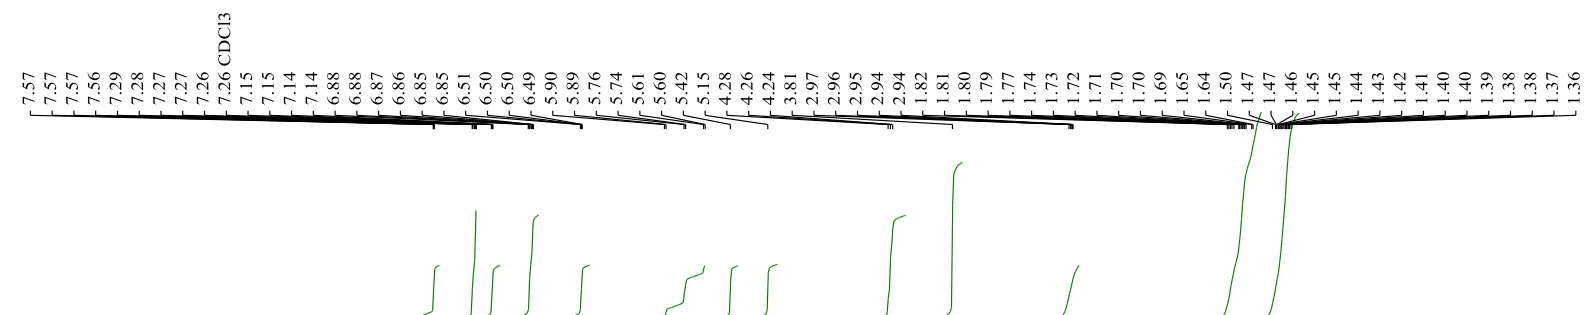

<sup>1</sup>H NMR of **34** (400 MHz, CDCl<sub>3</sub>)

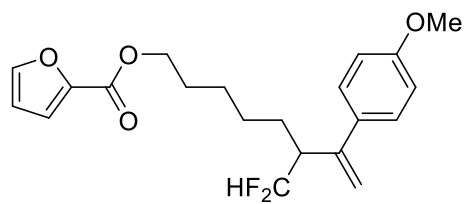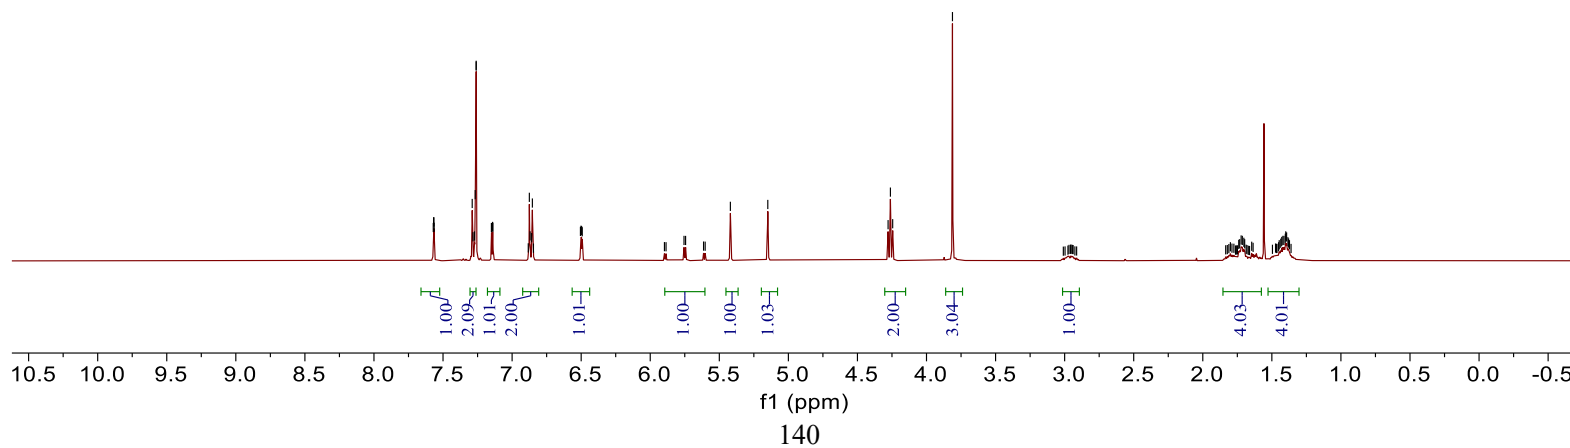



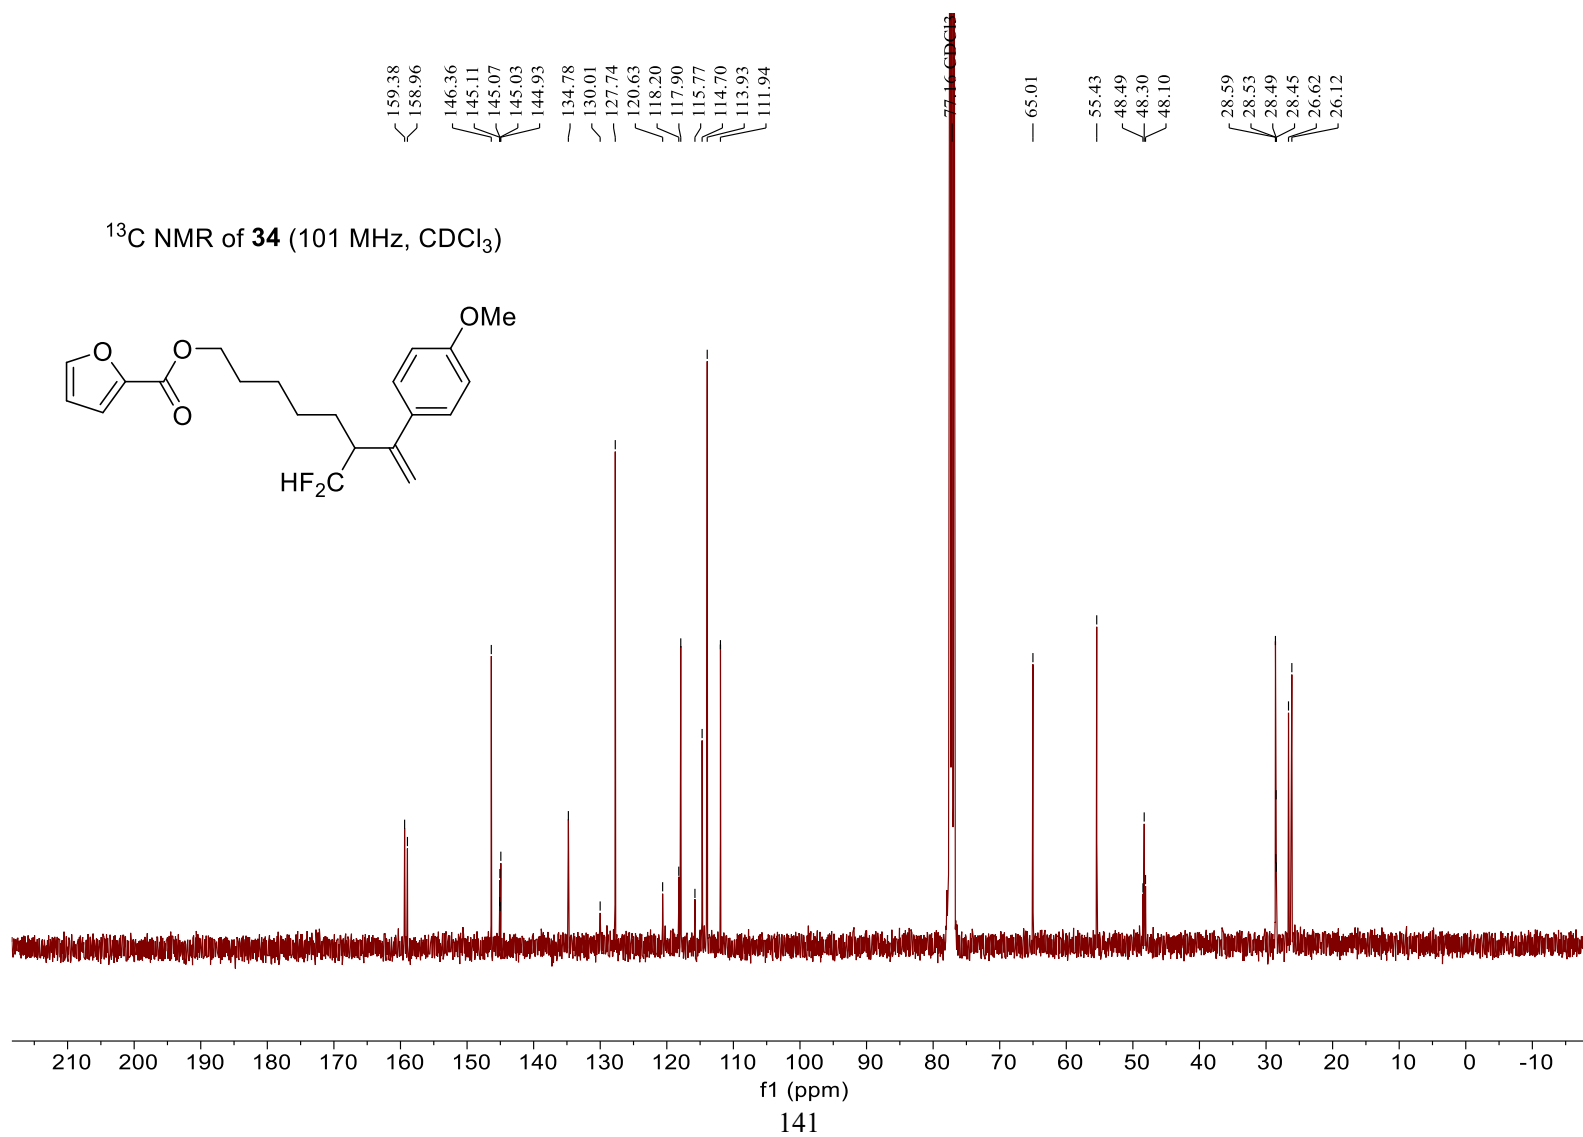

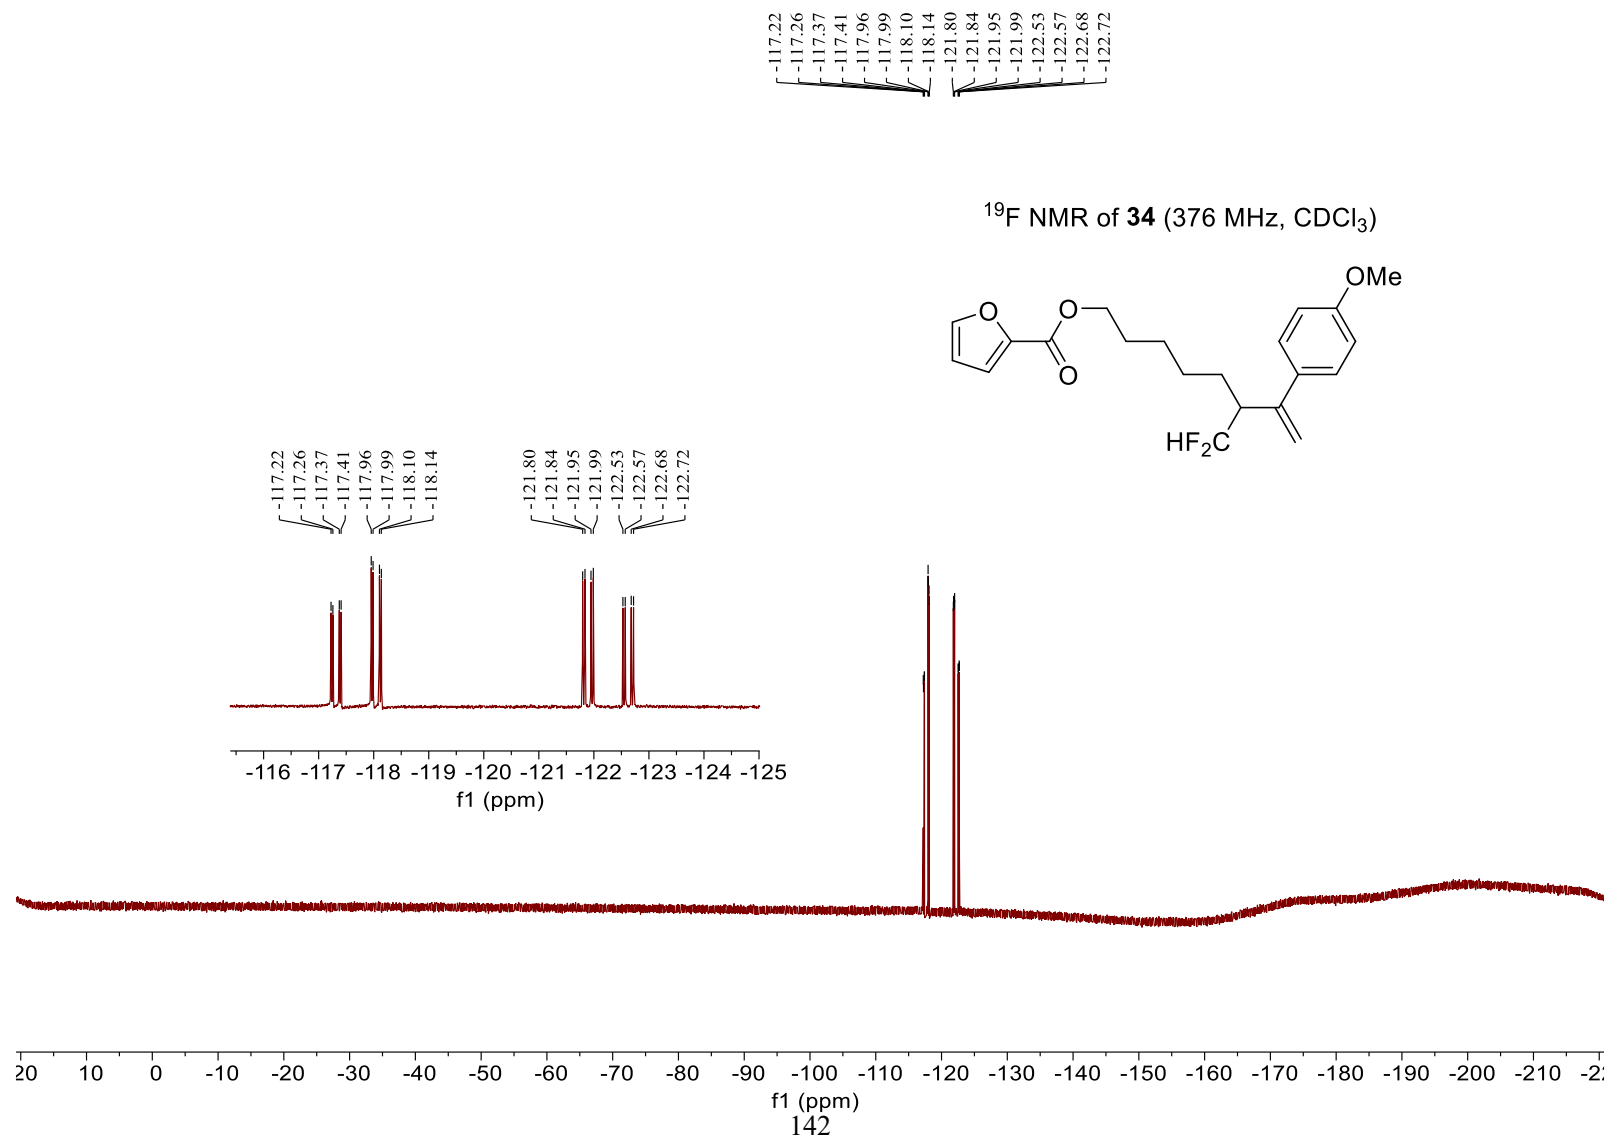

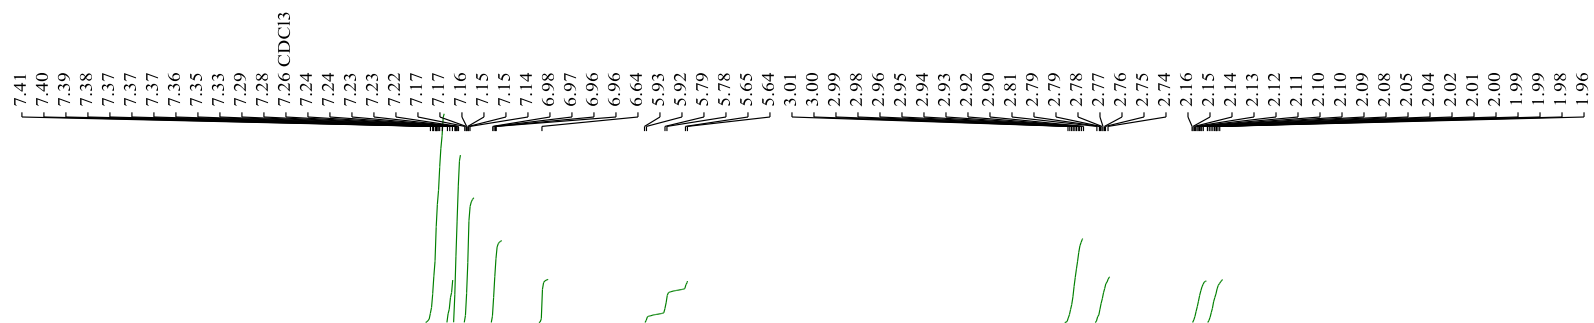

<sup>1</sup>H NMR of **35** (400 MHz, CDCl<sub>3</sub>)

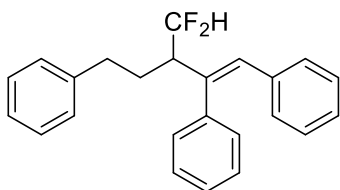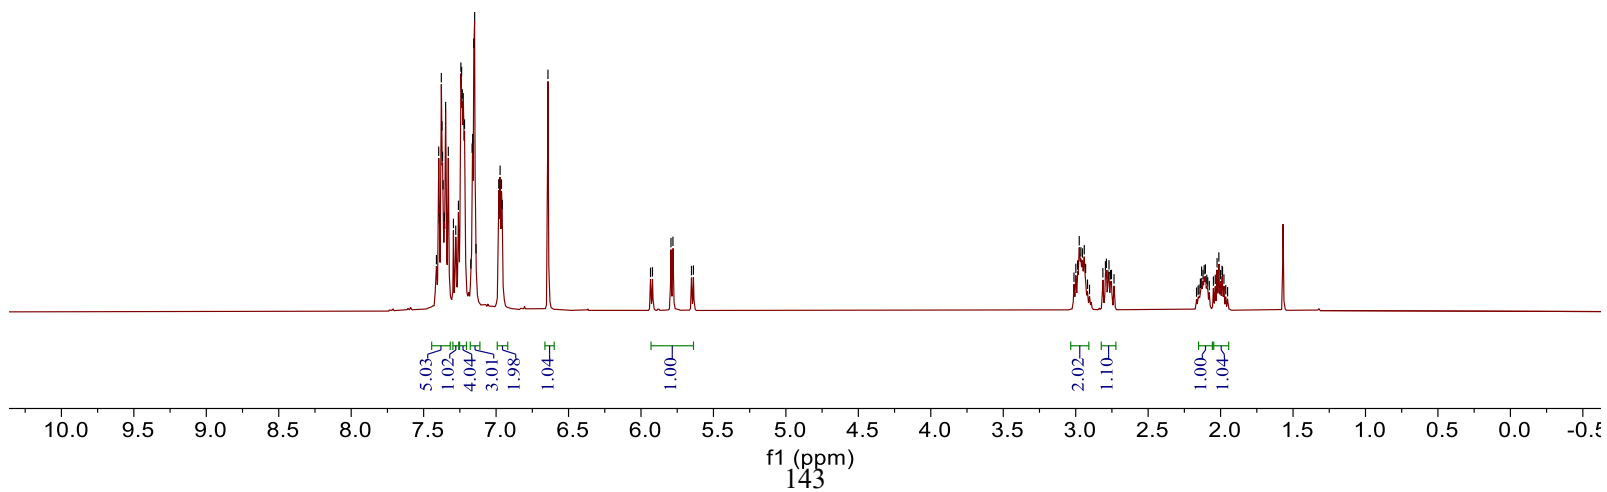

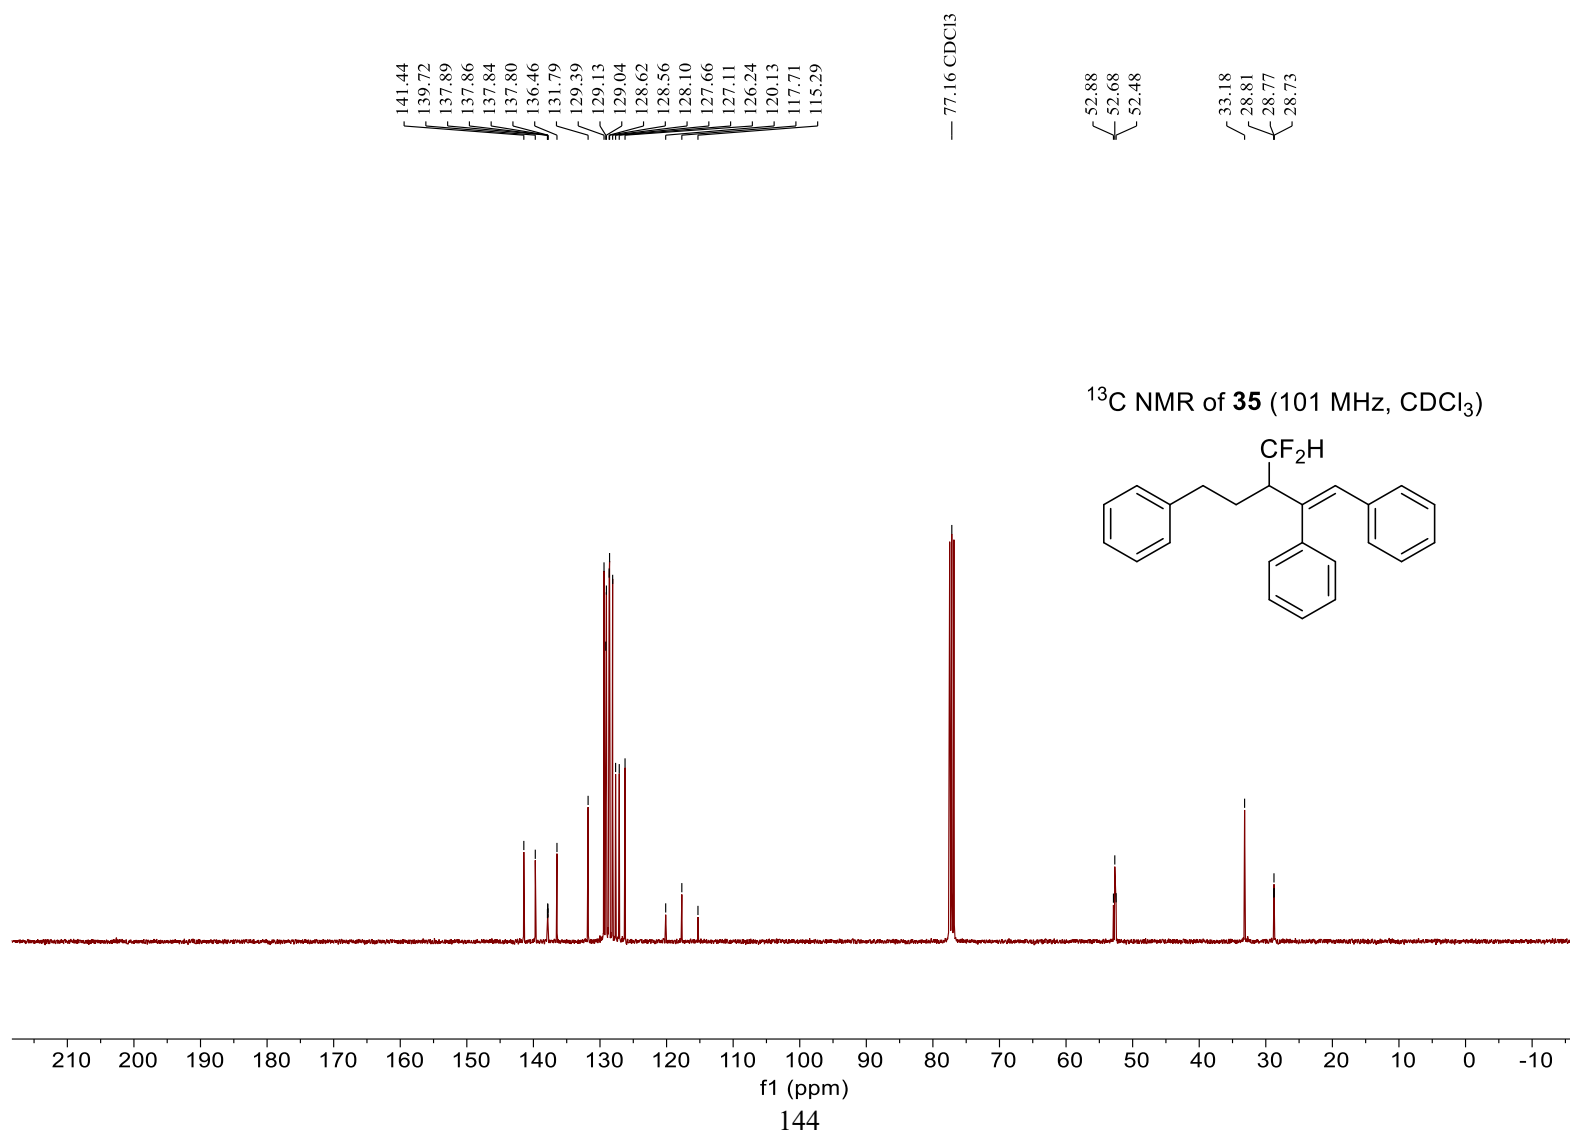

-116.22  
-116.25  
-116.37  
-116.40  
-116.96  
-116.99  
-117.11  
-117.14  
-123.04  
-123.08  
-123.19  
-123.24  
-123.78  
-123.82  
-123.93  
-123.97

$^{19}\text{F}$  NMR of **35** (376 MHz,  $\text{CDCl}_3$ )

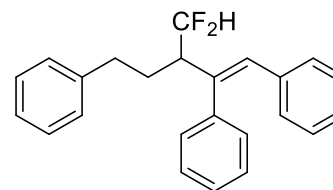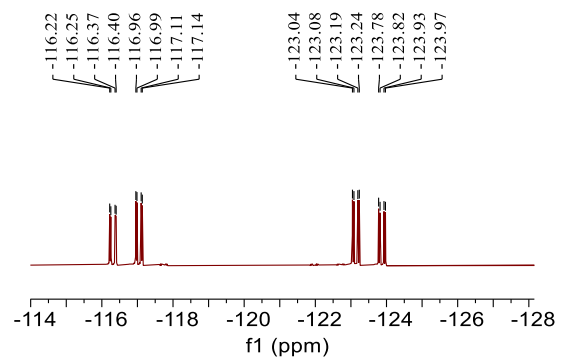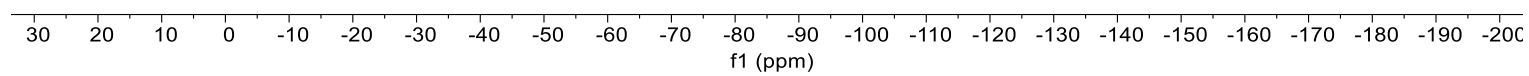

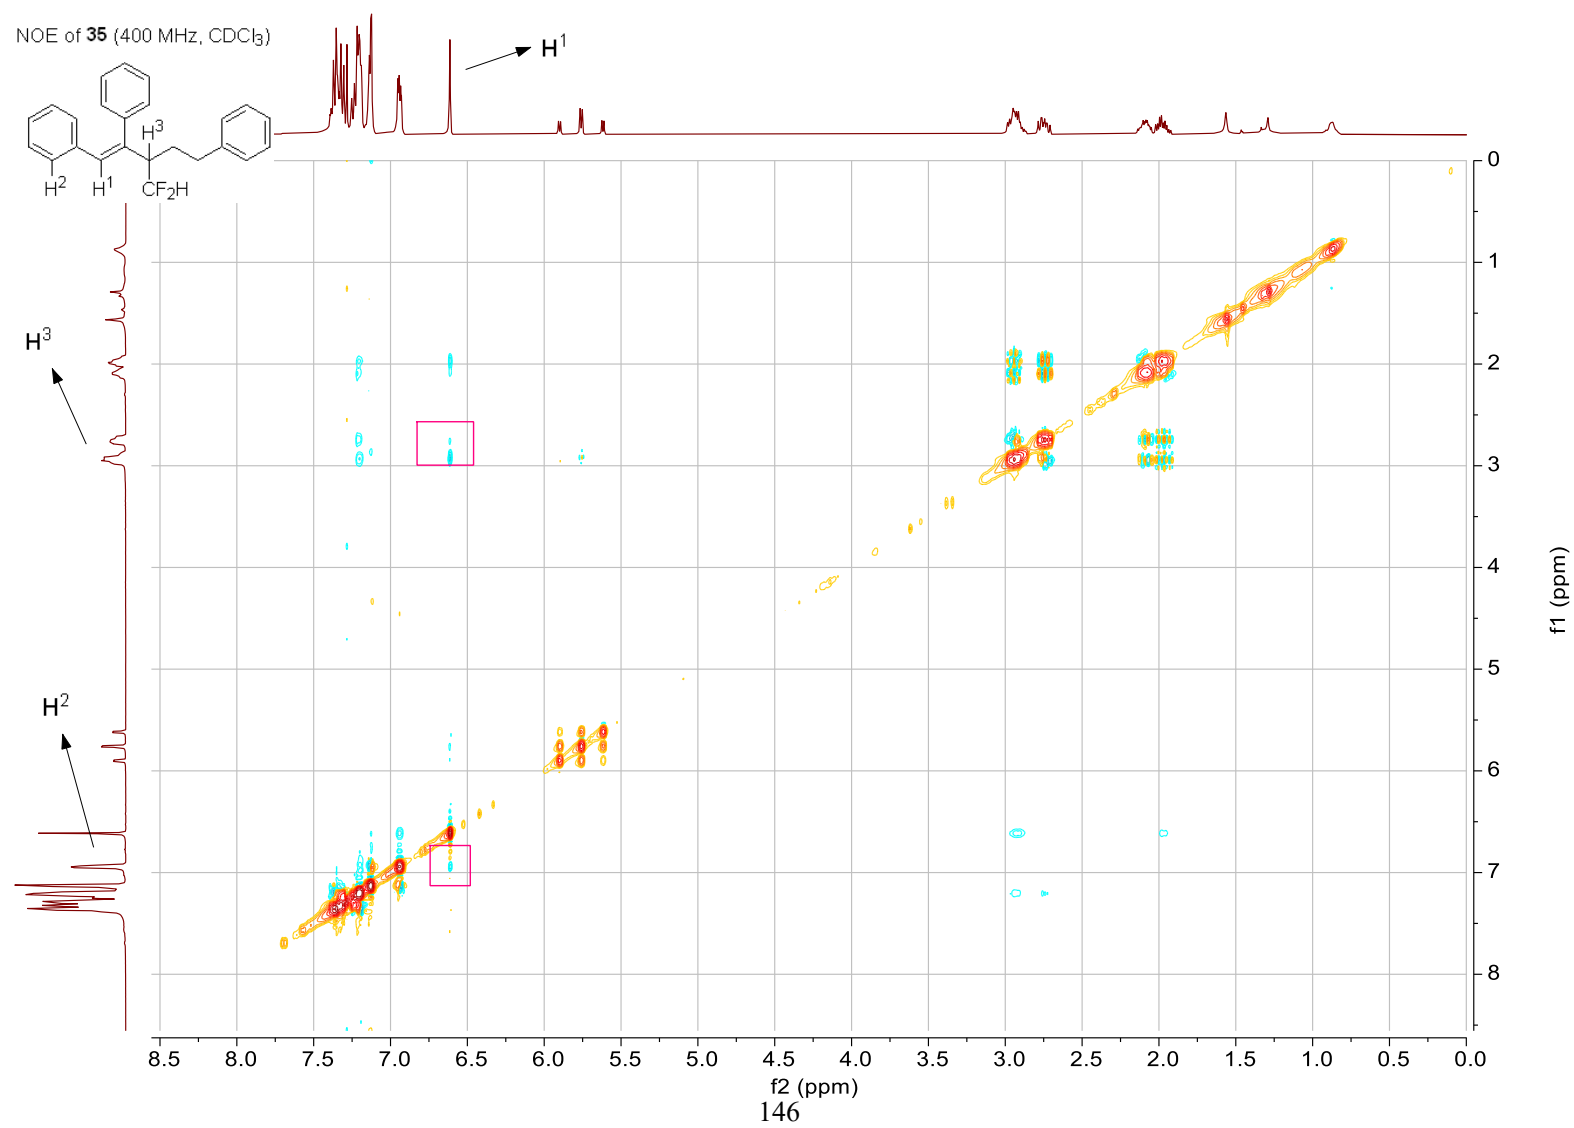

COSY of **35** (400 MHz, CDCl<sub>3</sub>)

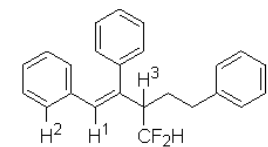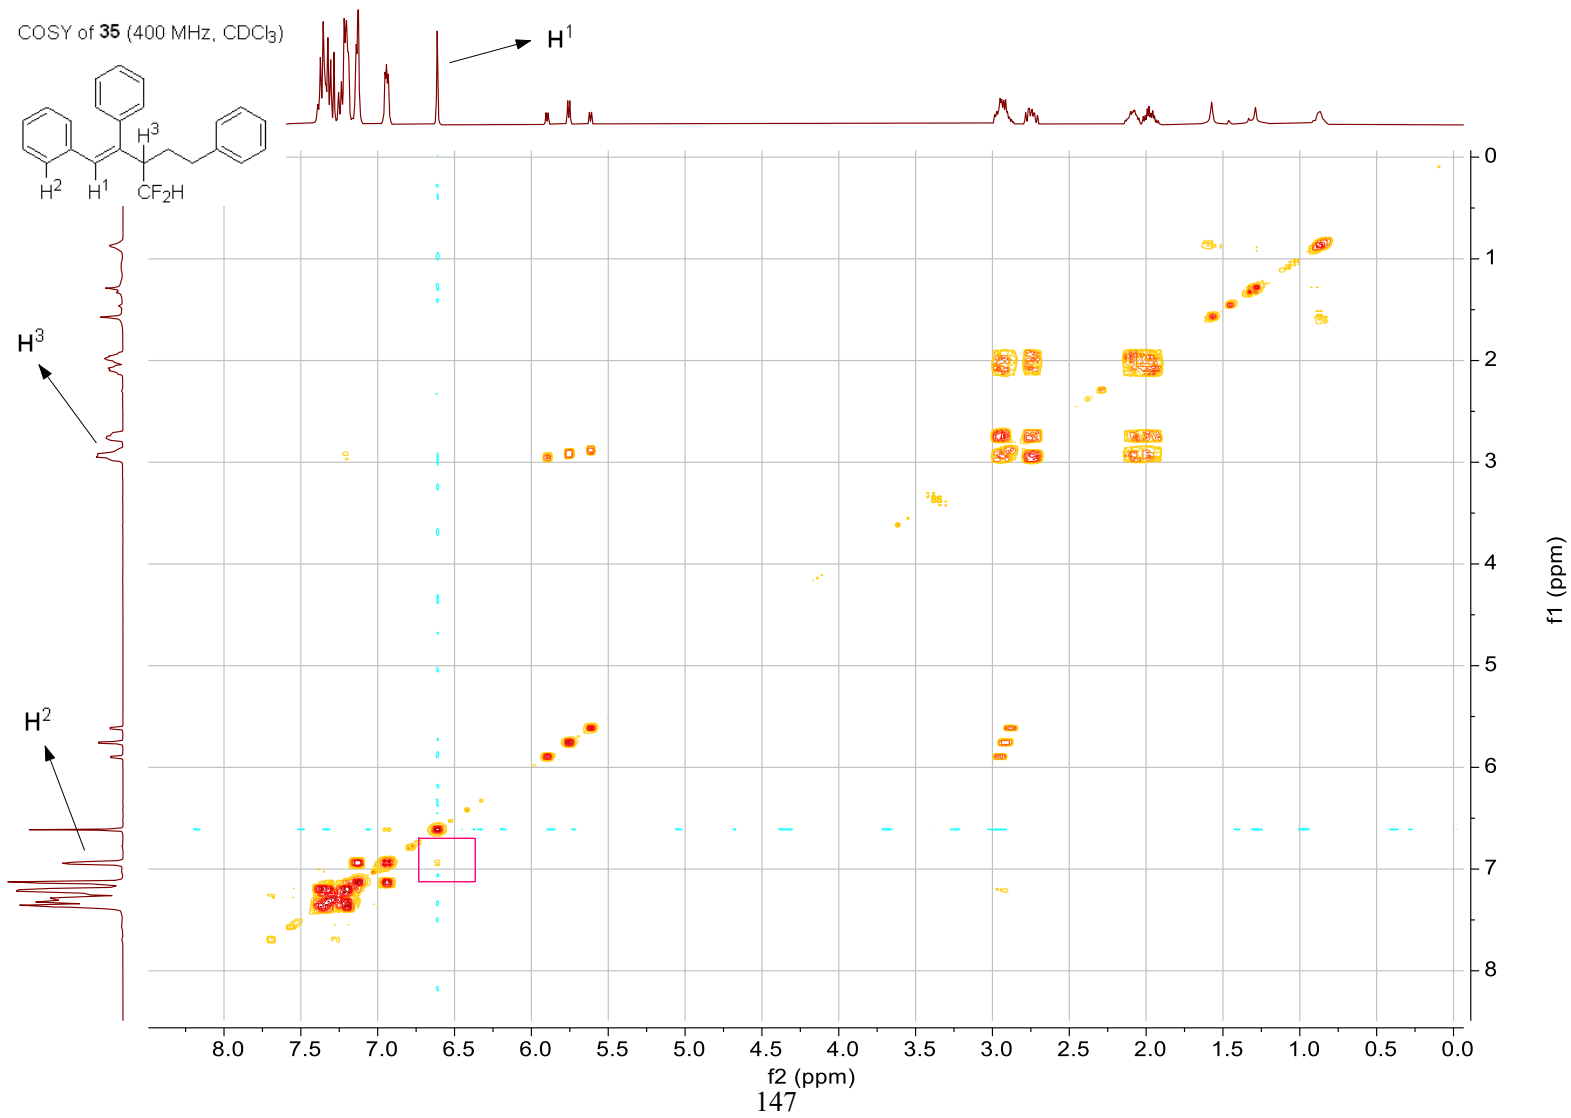

<sup>1</sup>H NMR of **36** (400 MHz, CDCl<sub>3</sub>)

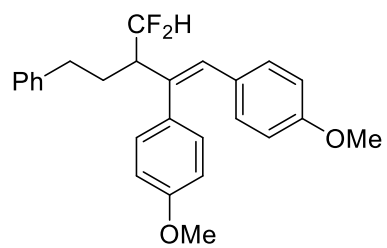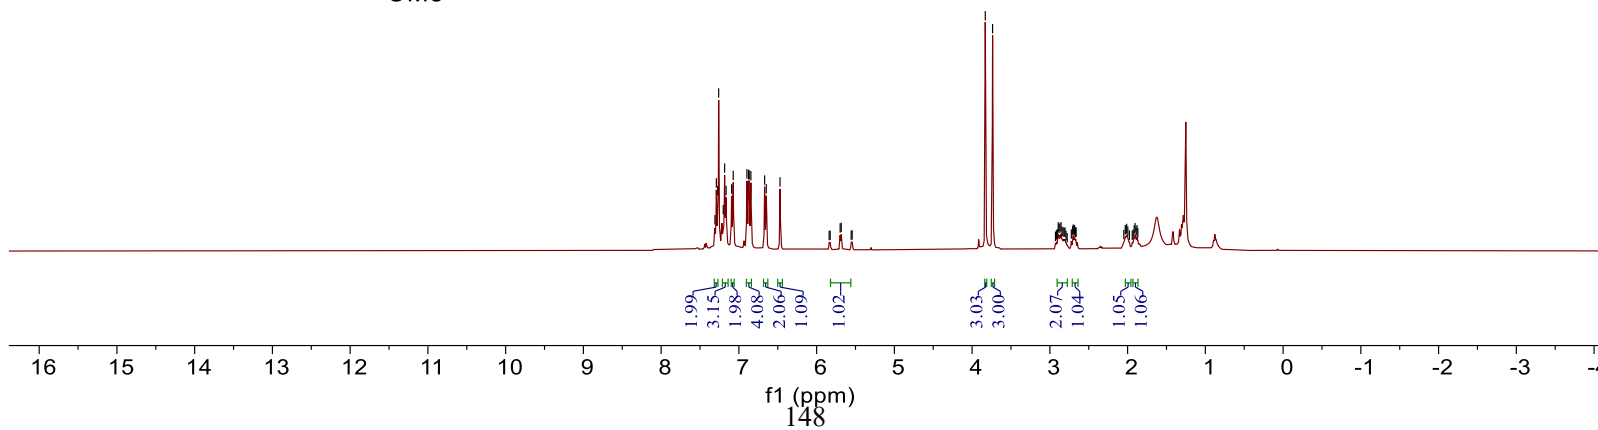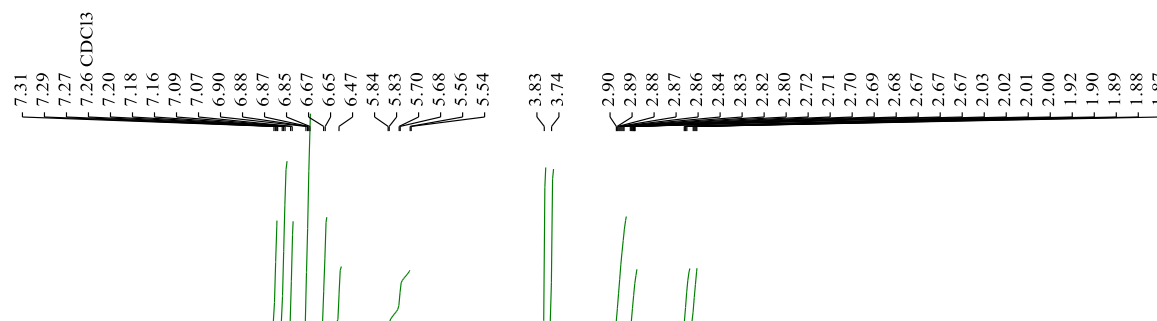



$^{13}\text{C}$  NMR of **36** (101 MHz,  $\text{CDCl}_3$ )

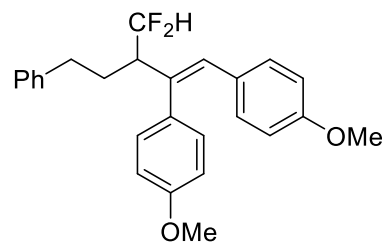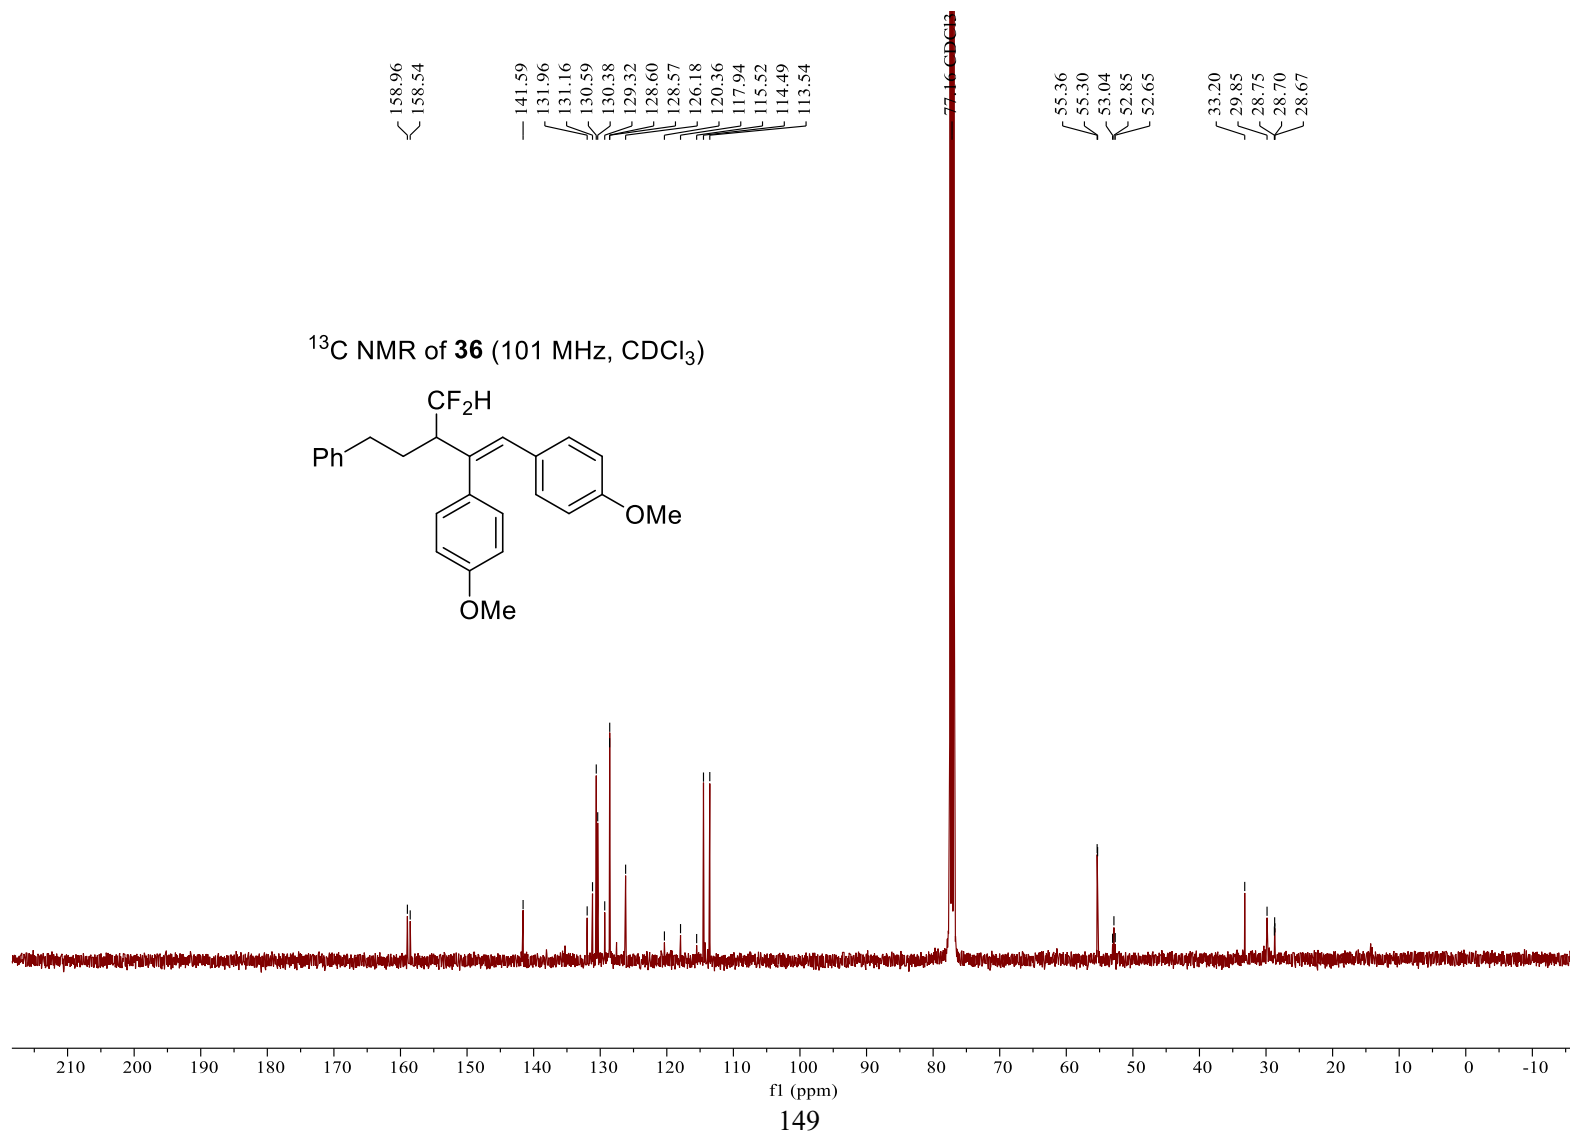

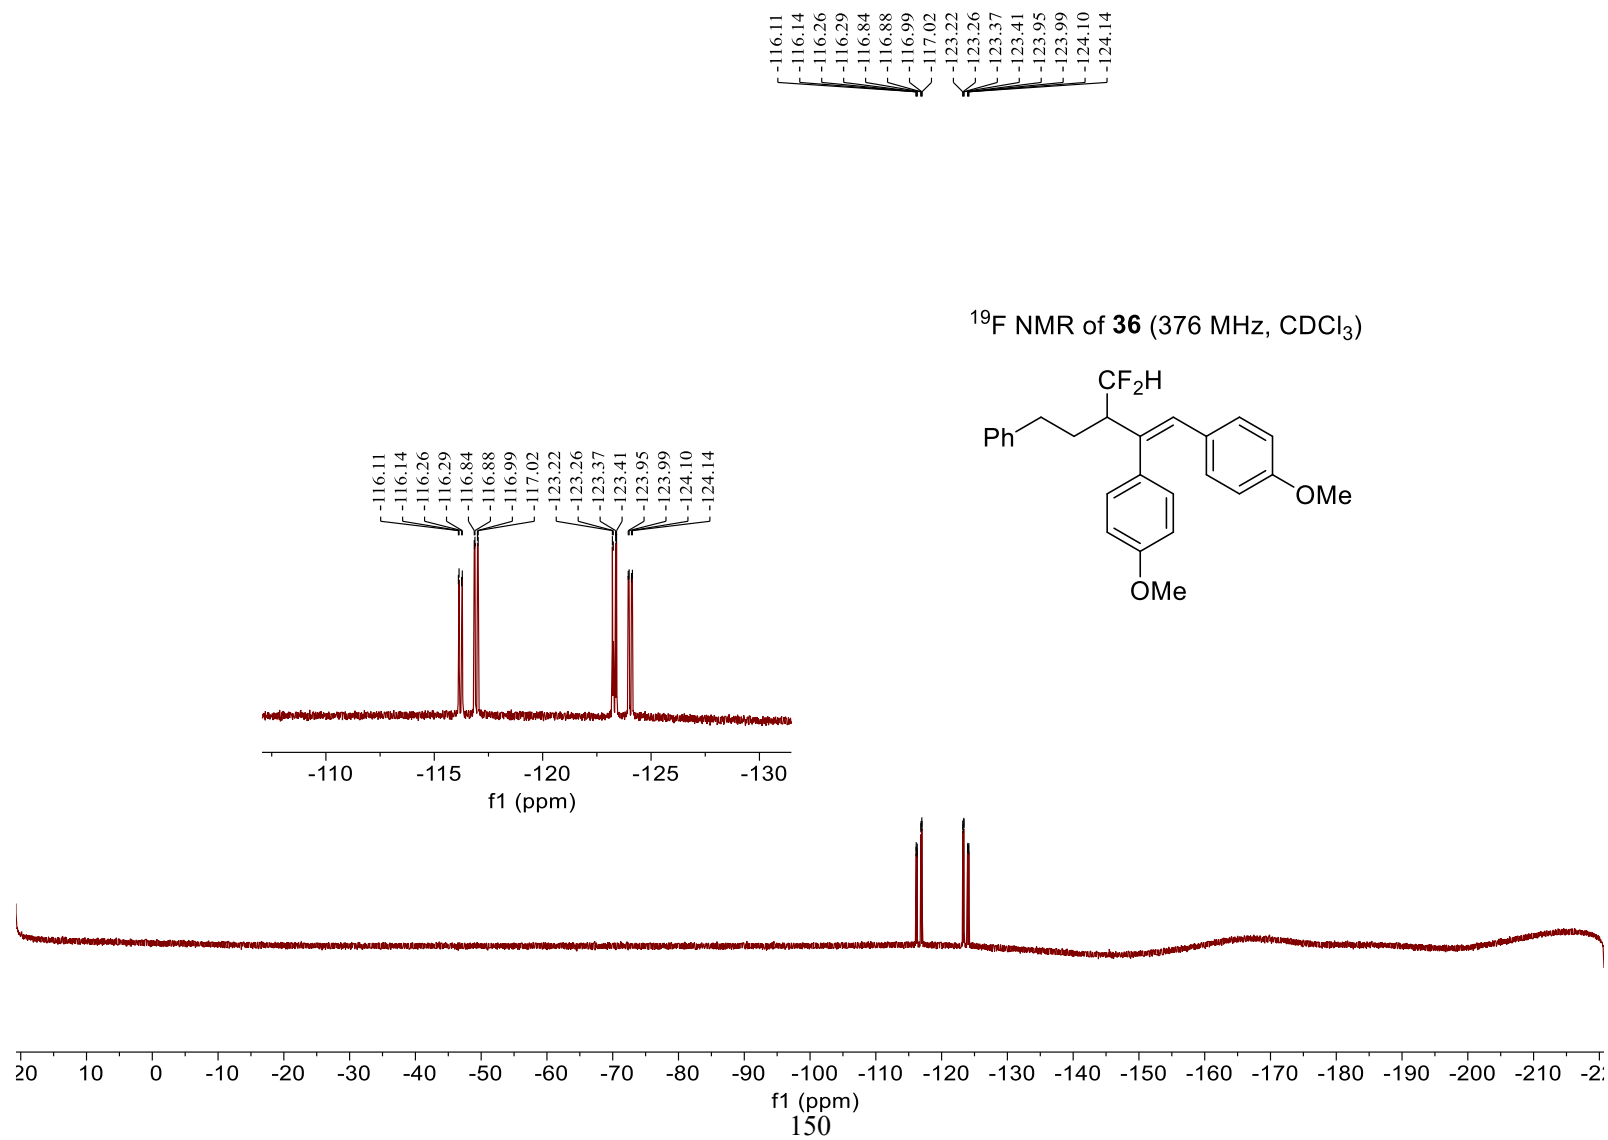

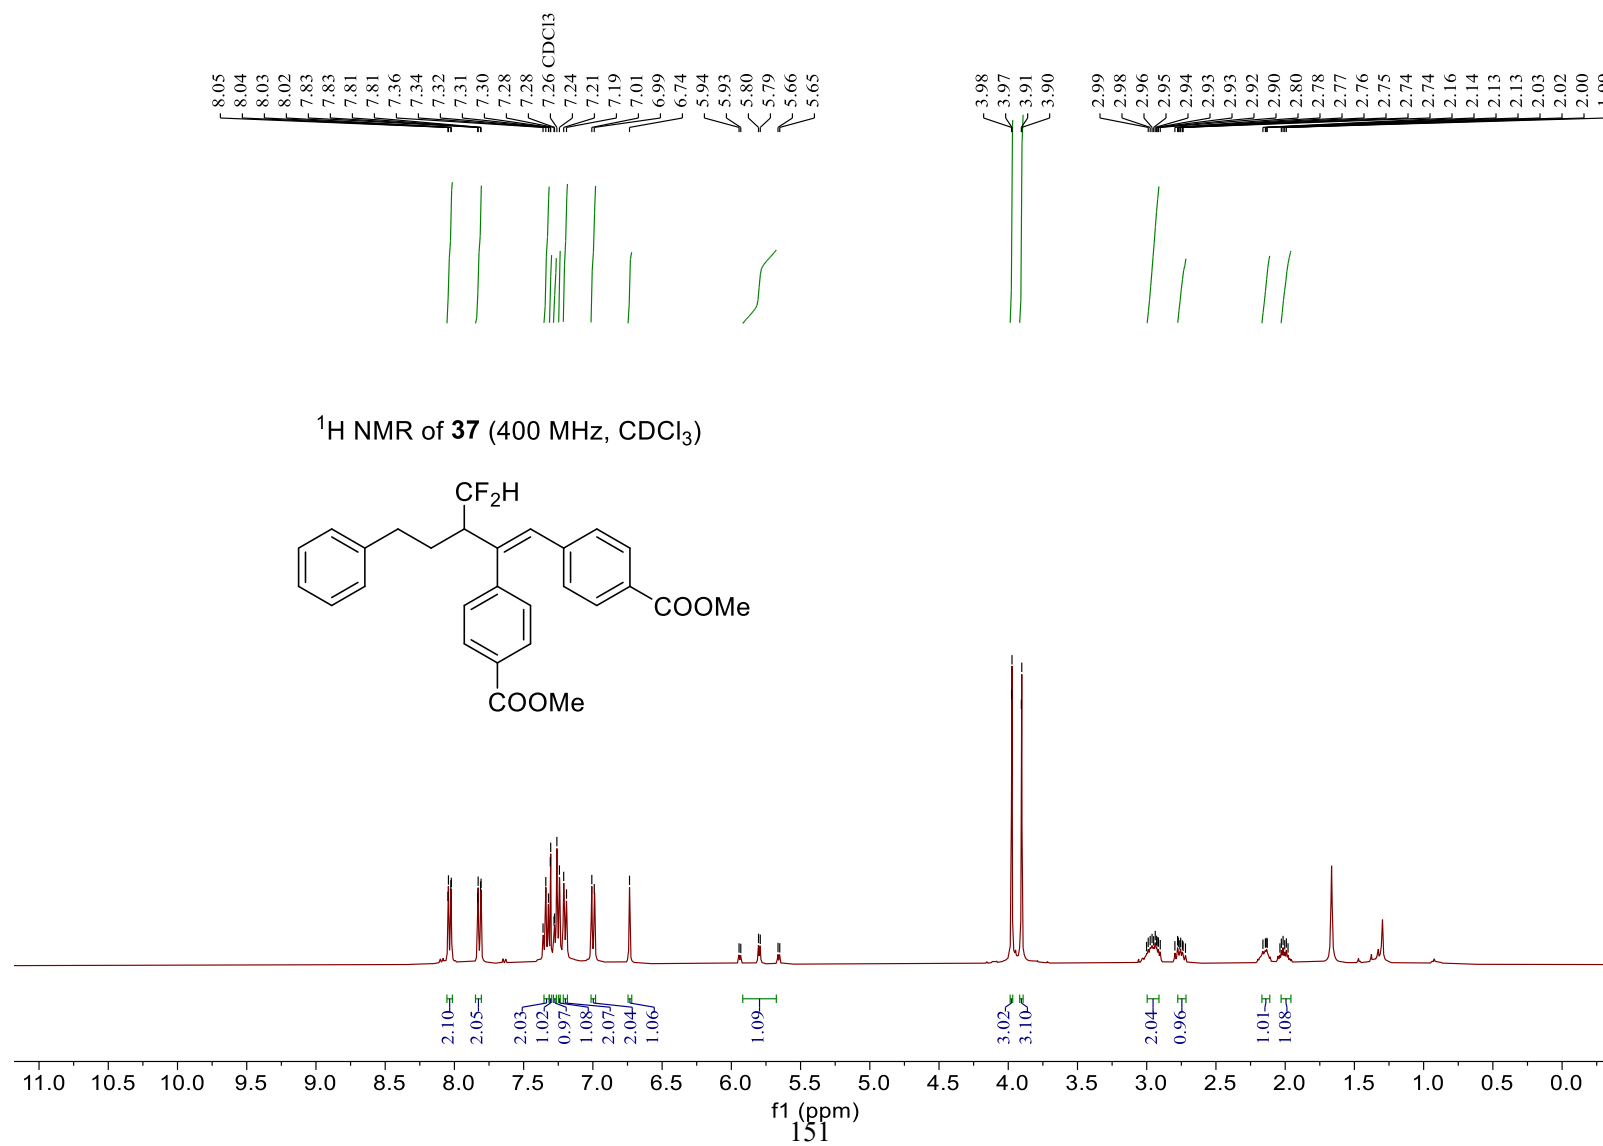

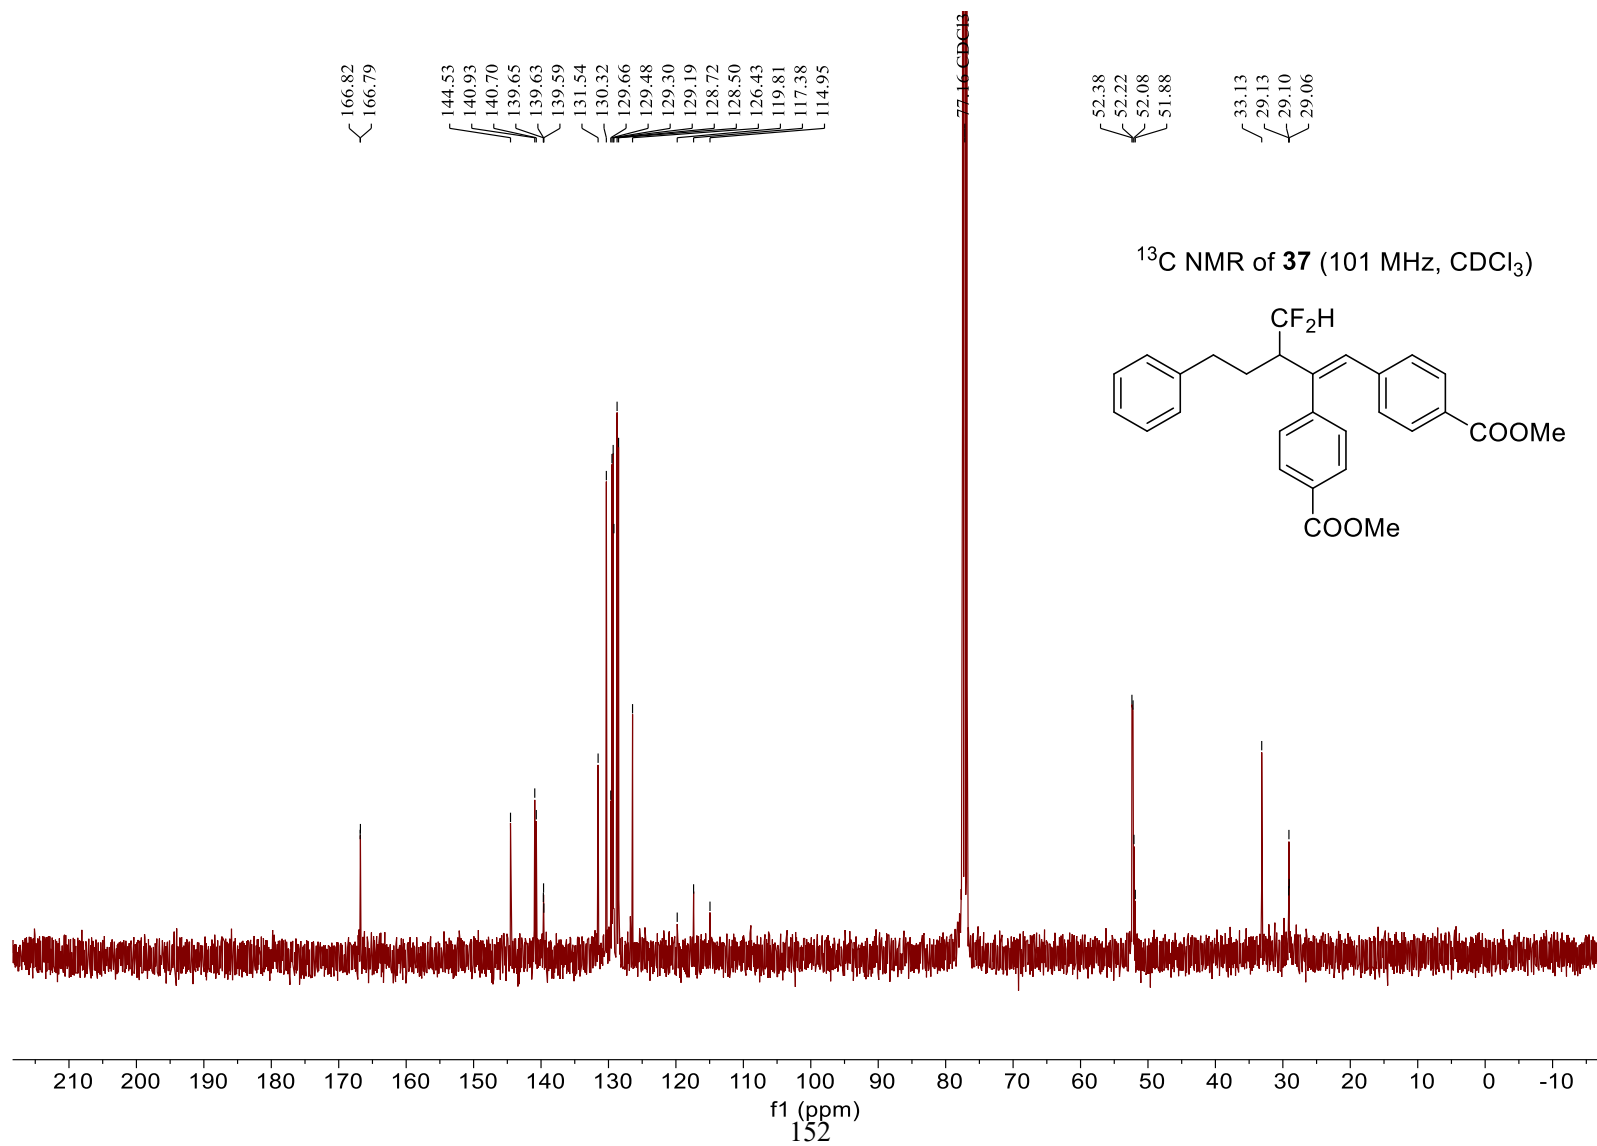

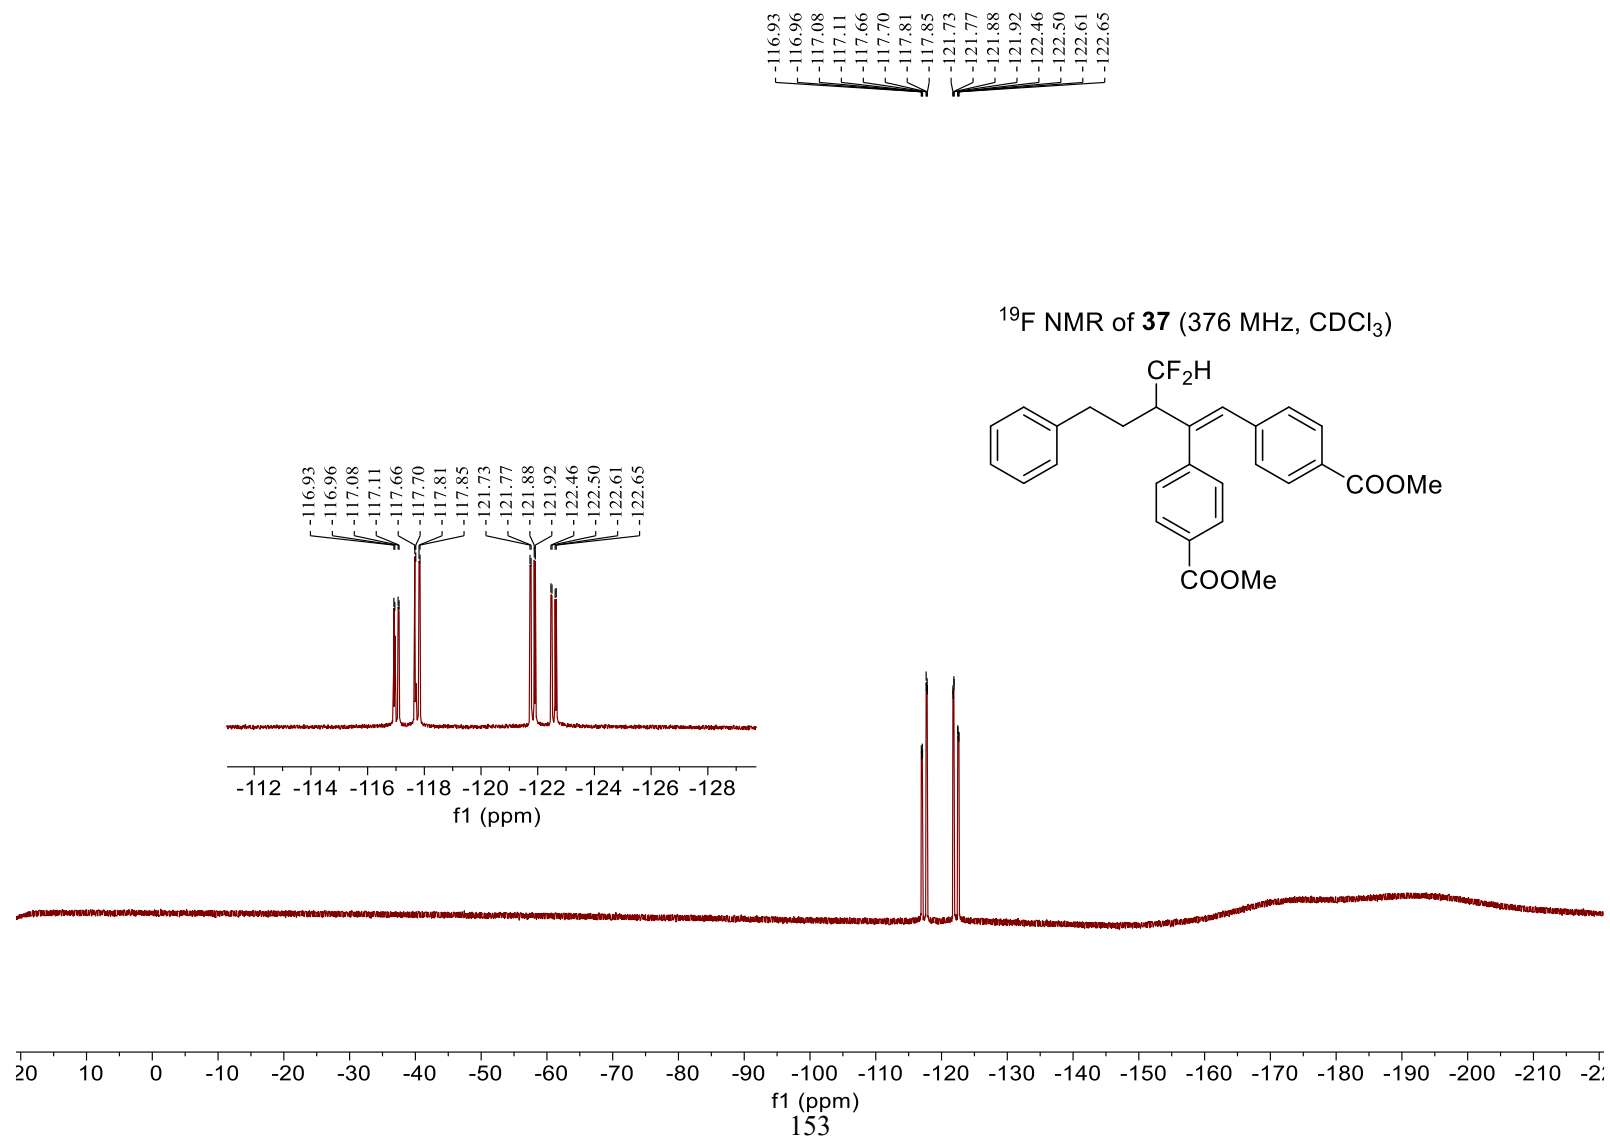

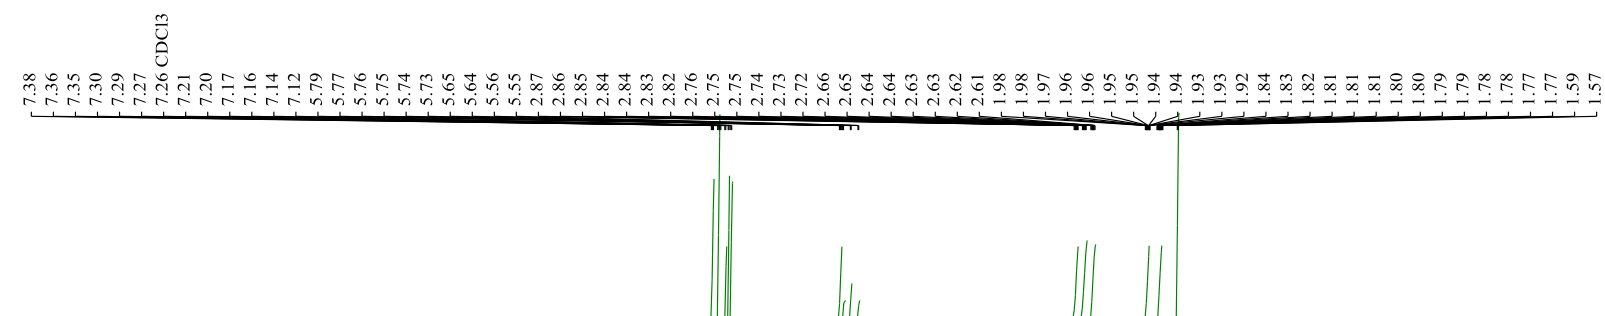

<sup>1</sup>H NMR of **38** (400 MHz, CDCl<sub>3</sub>)

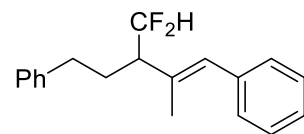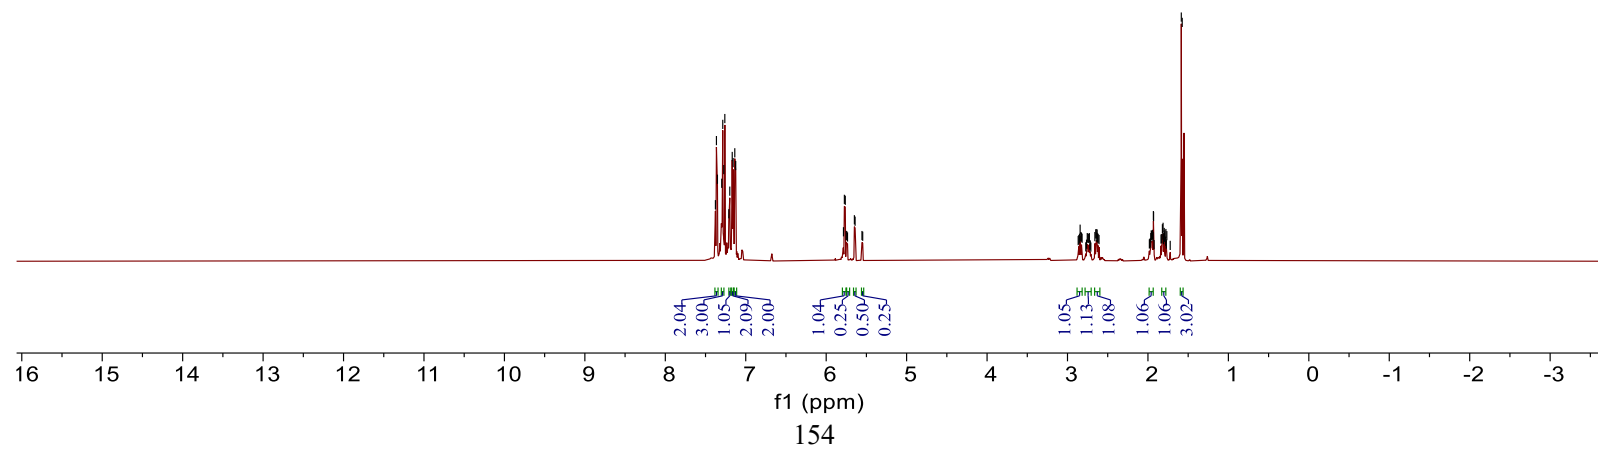

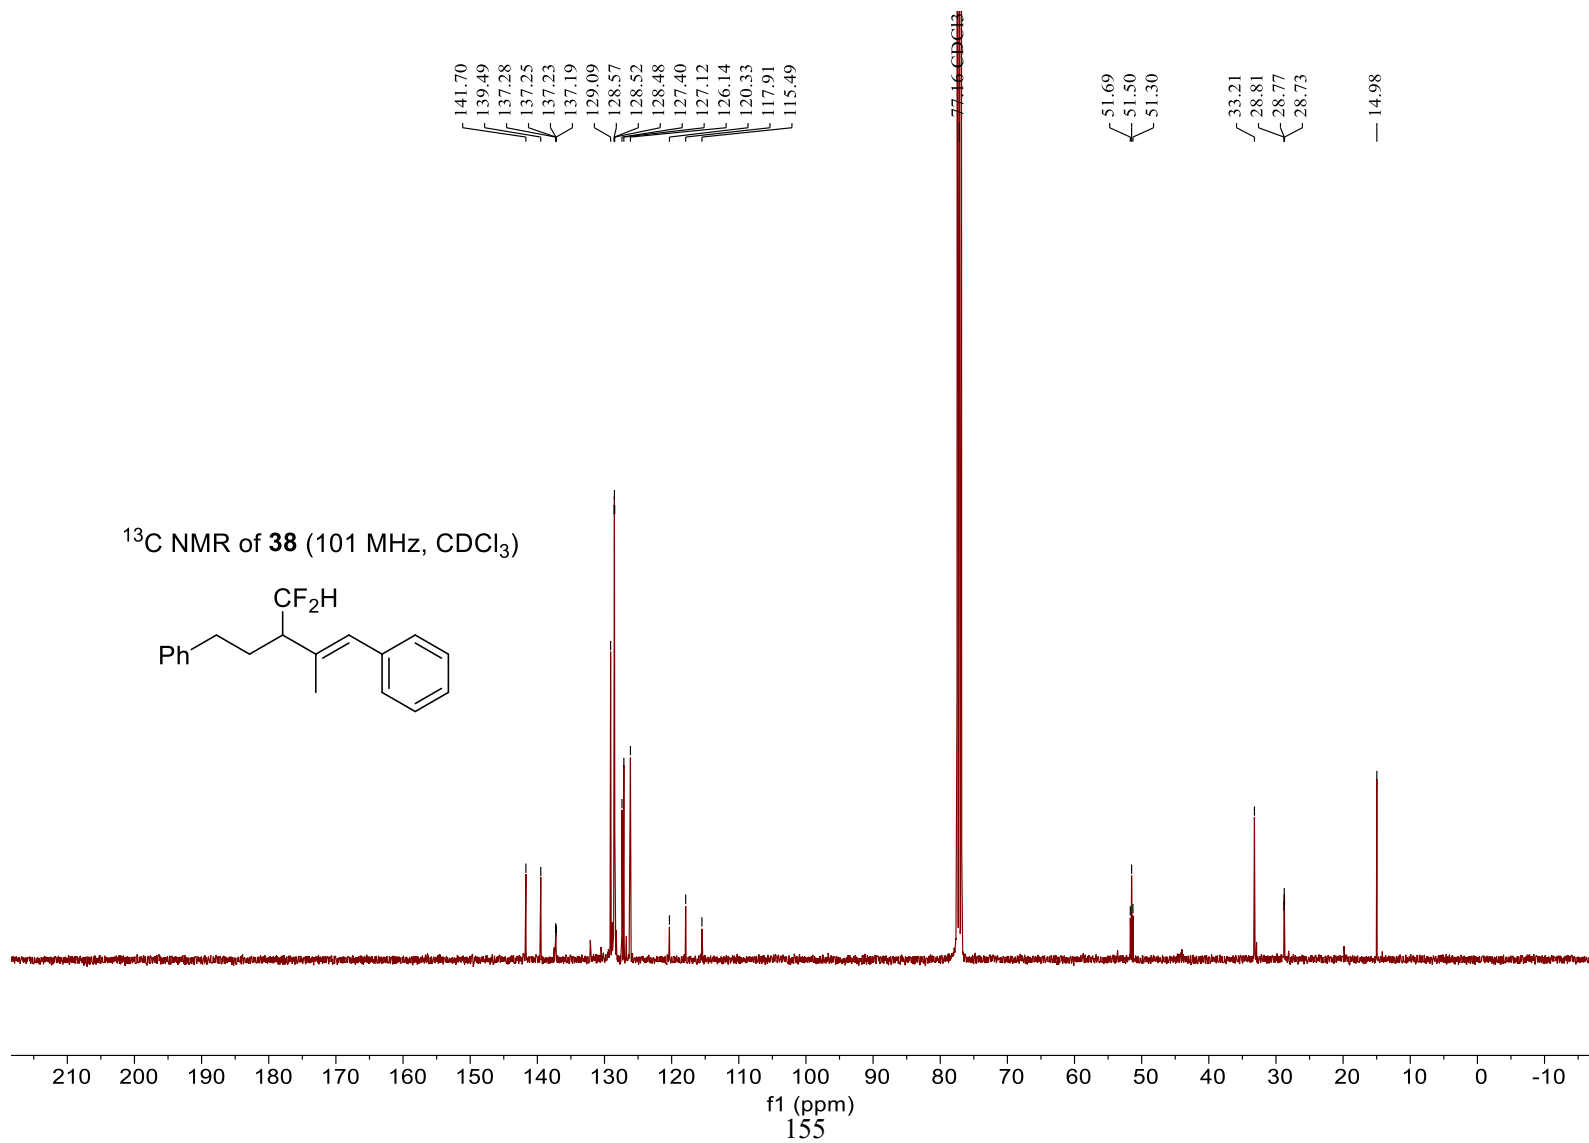

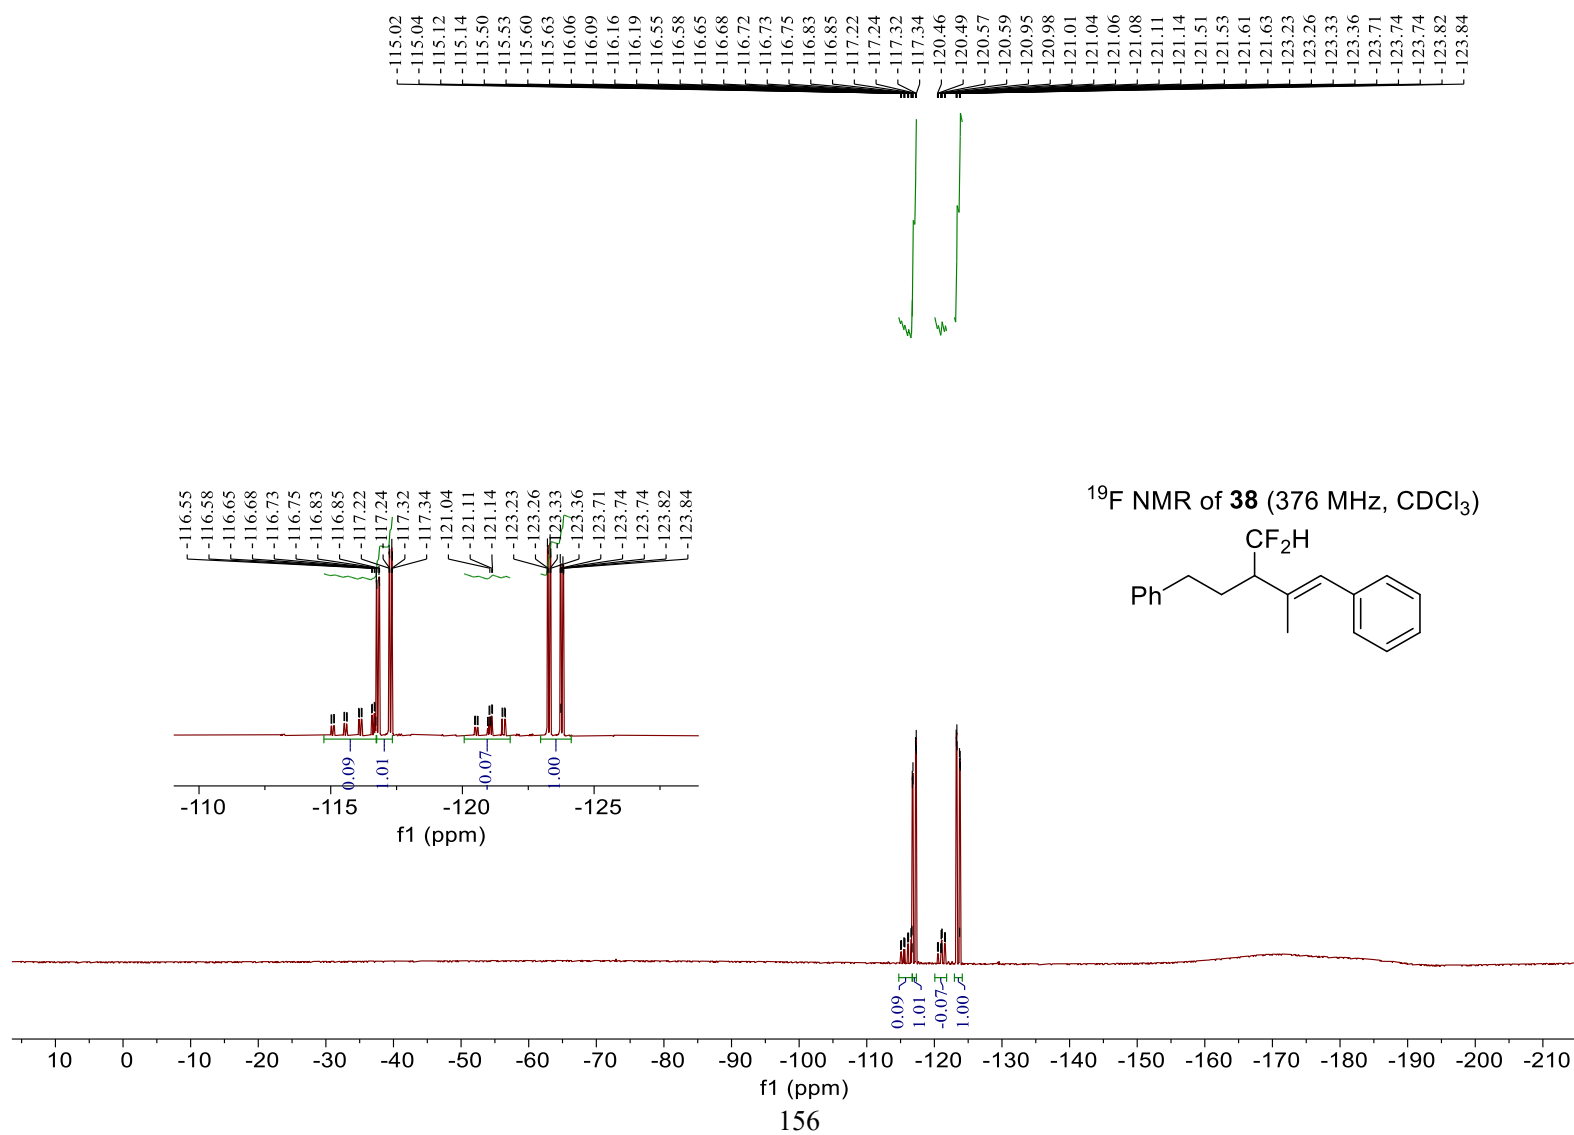



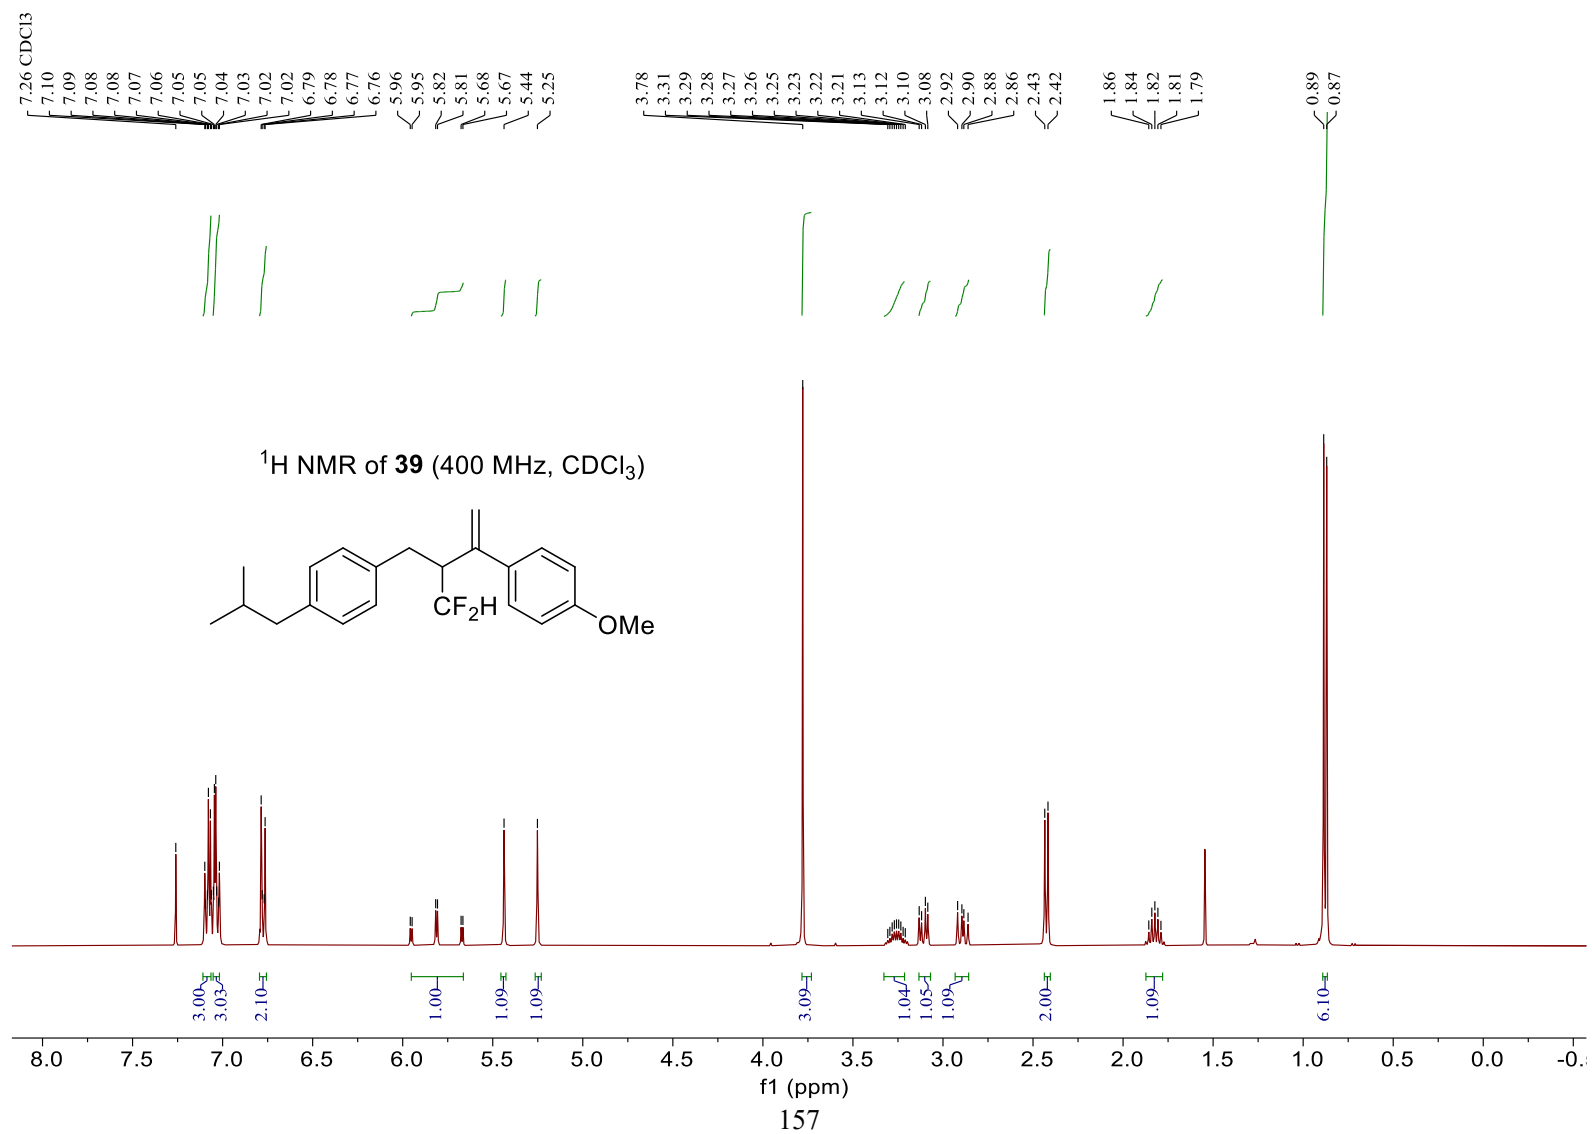

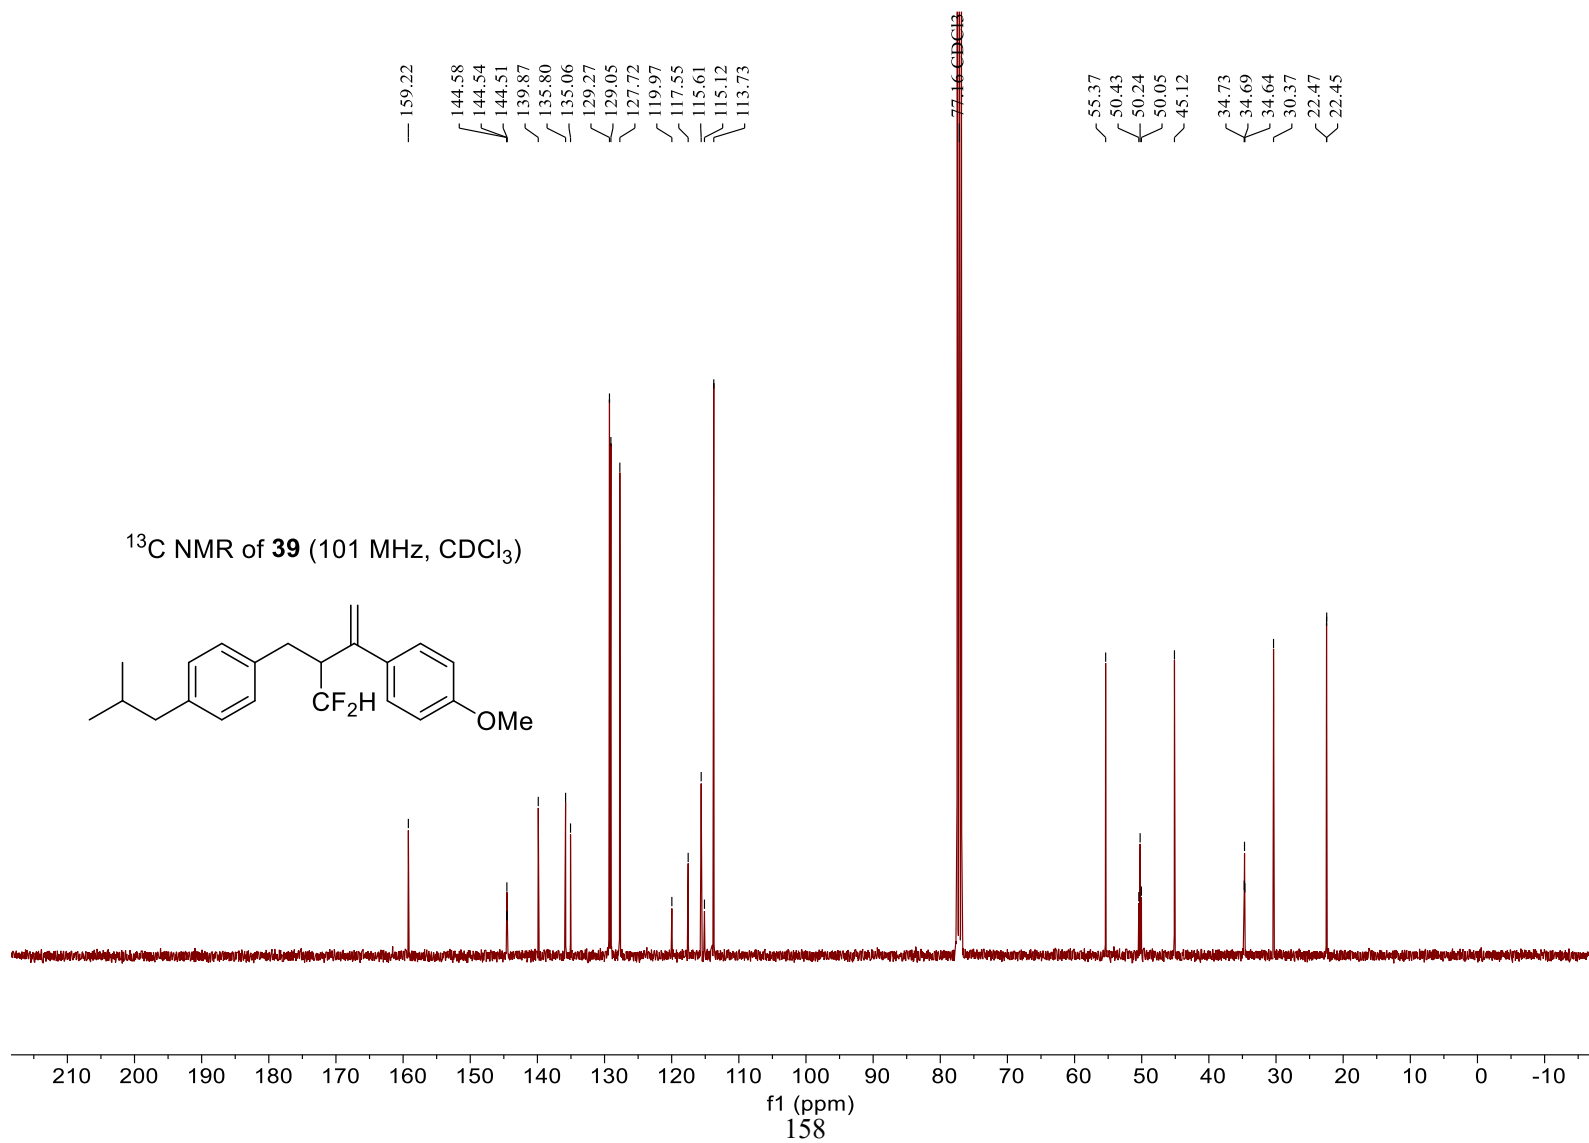

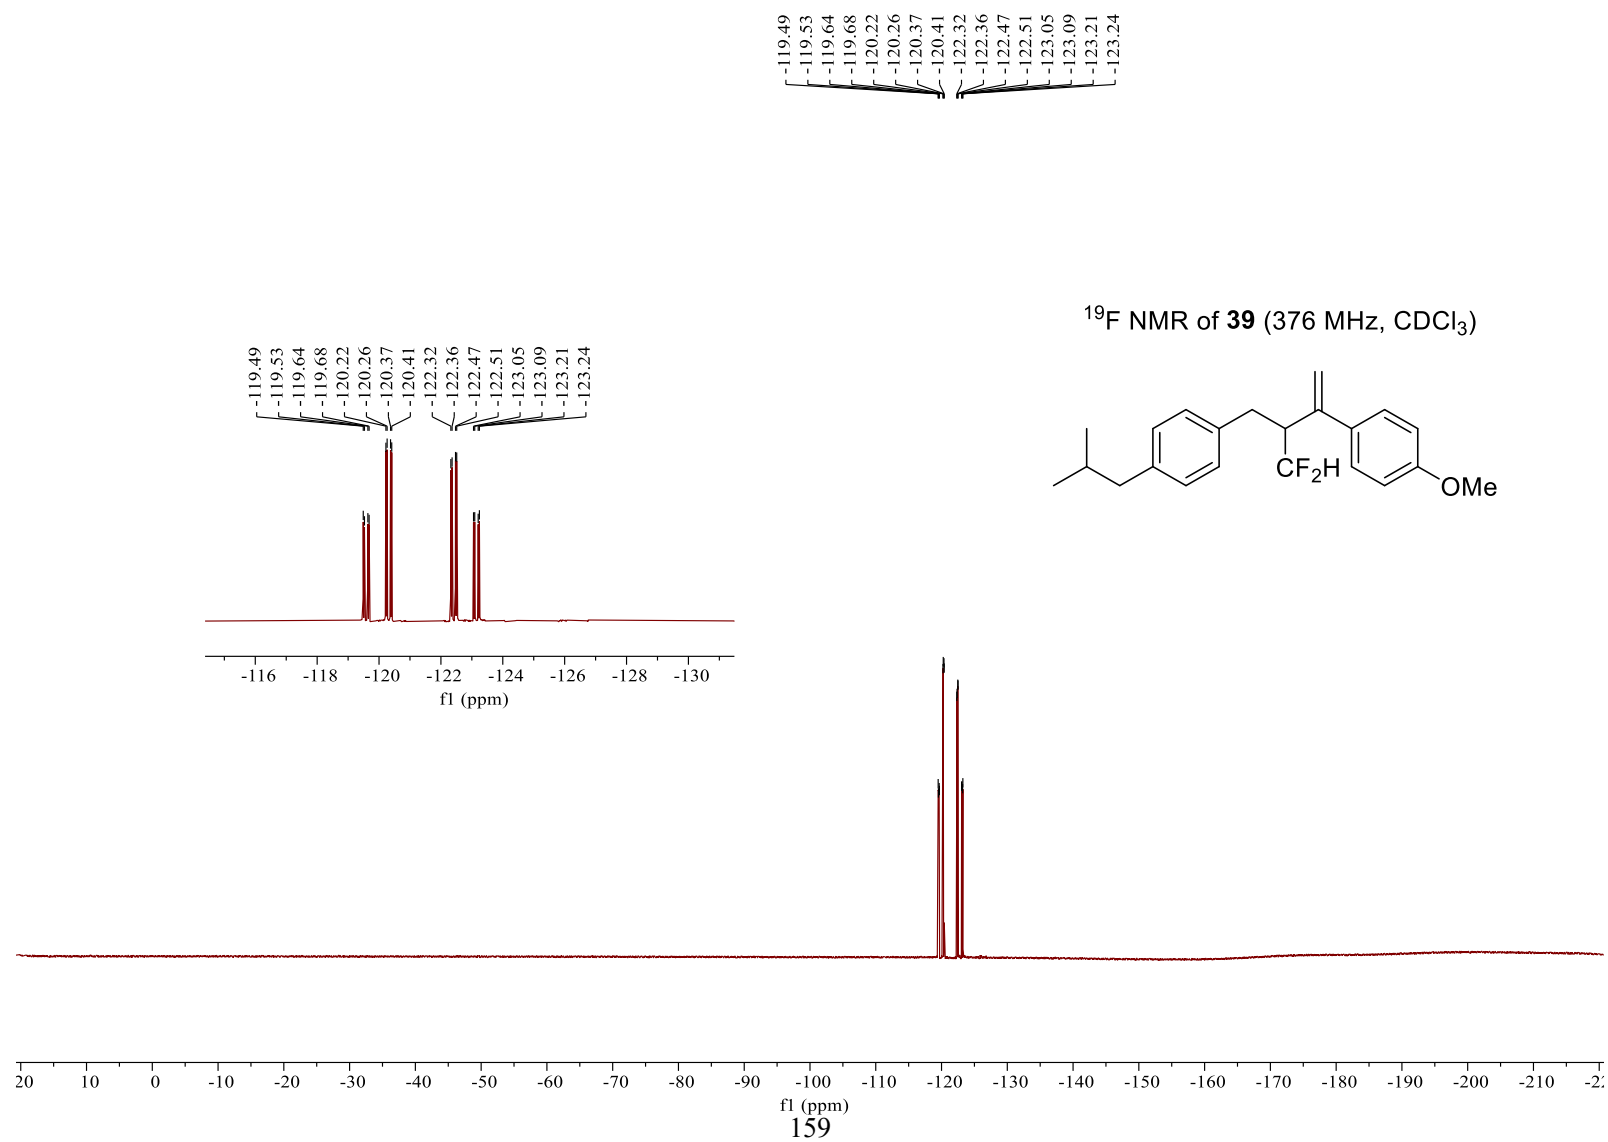

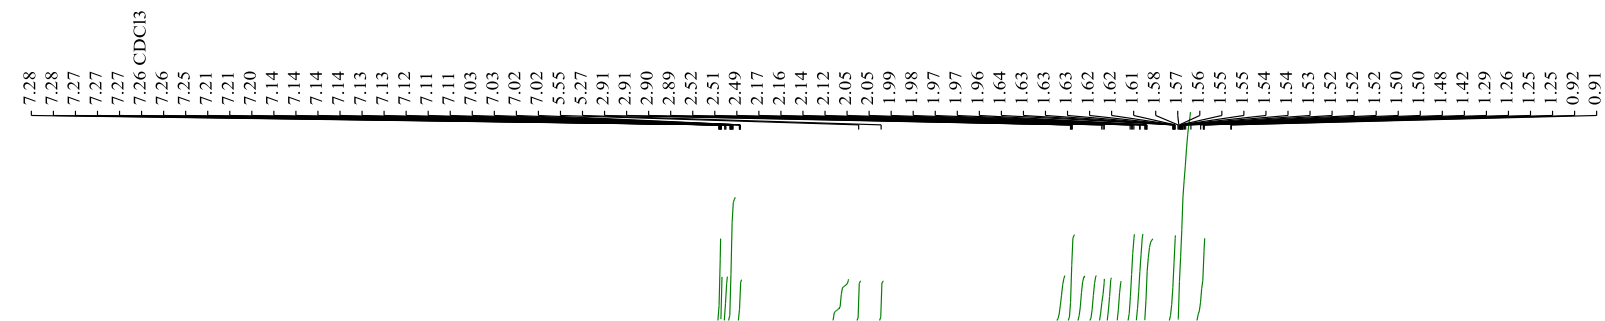

<sup>1</sup>H NMR of **40** (400 MHz, CDCl<sub>3</sub>)

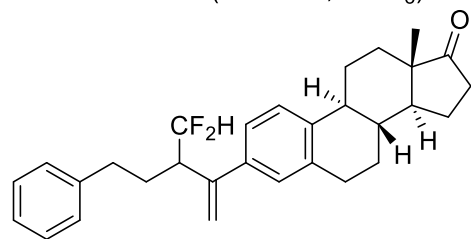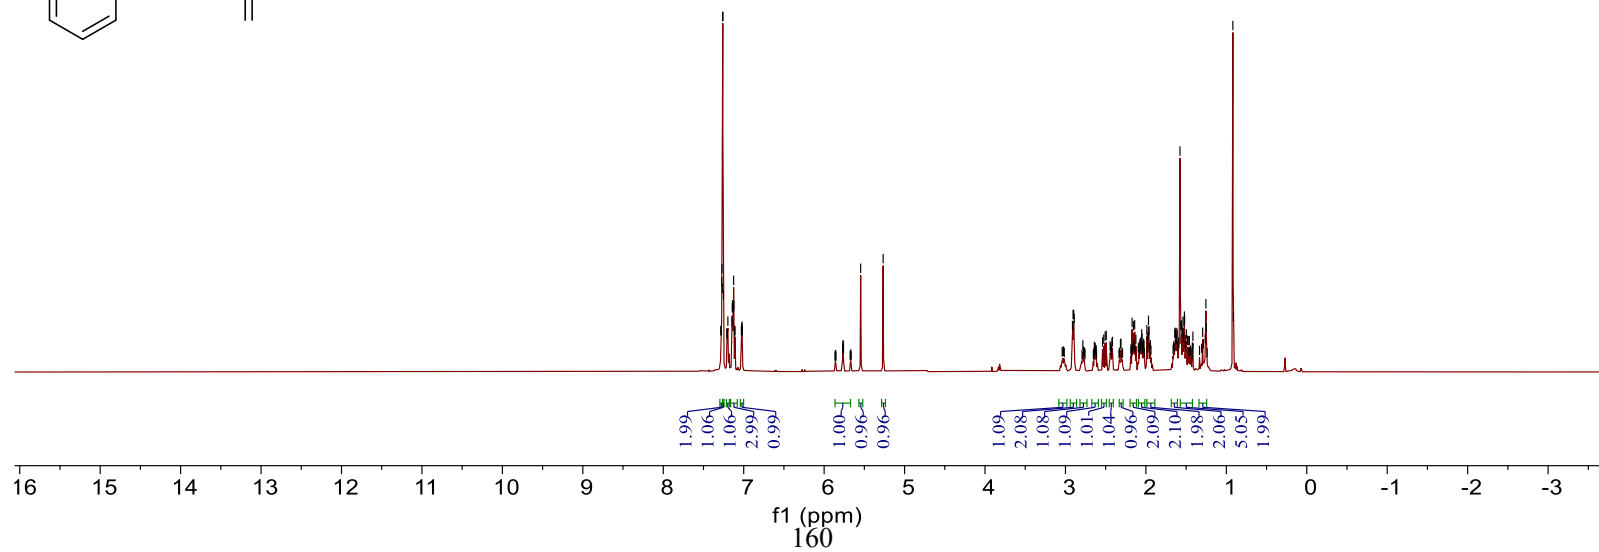

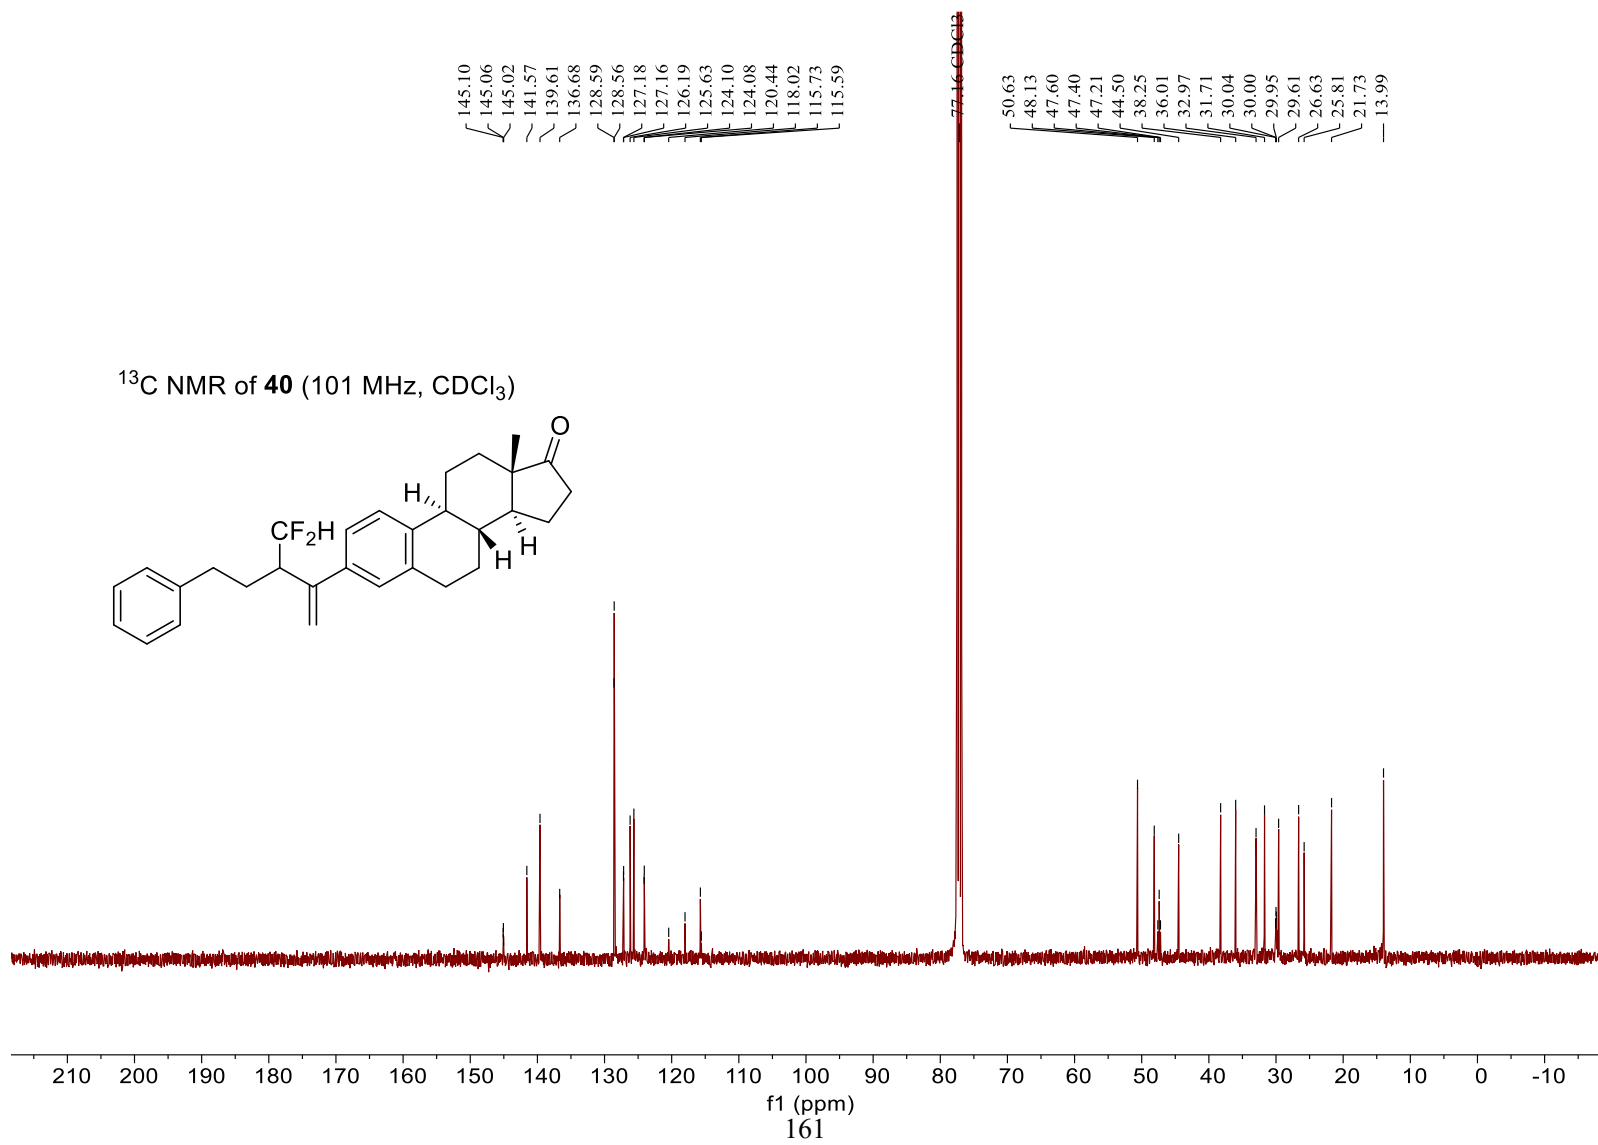

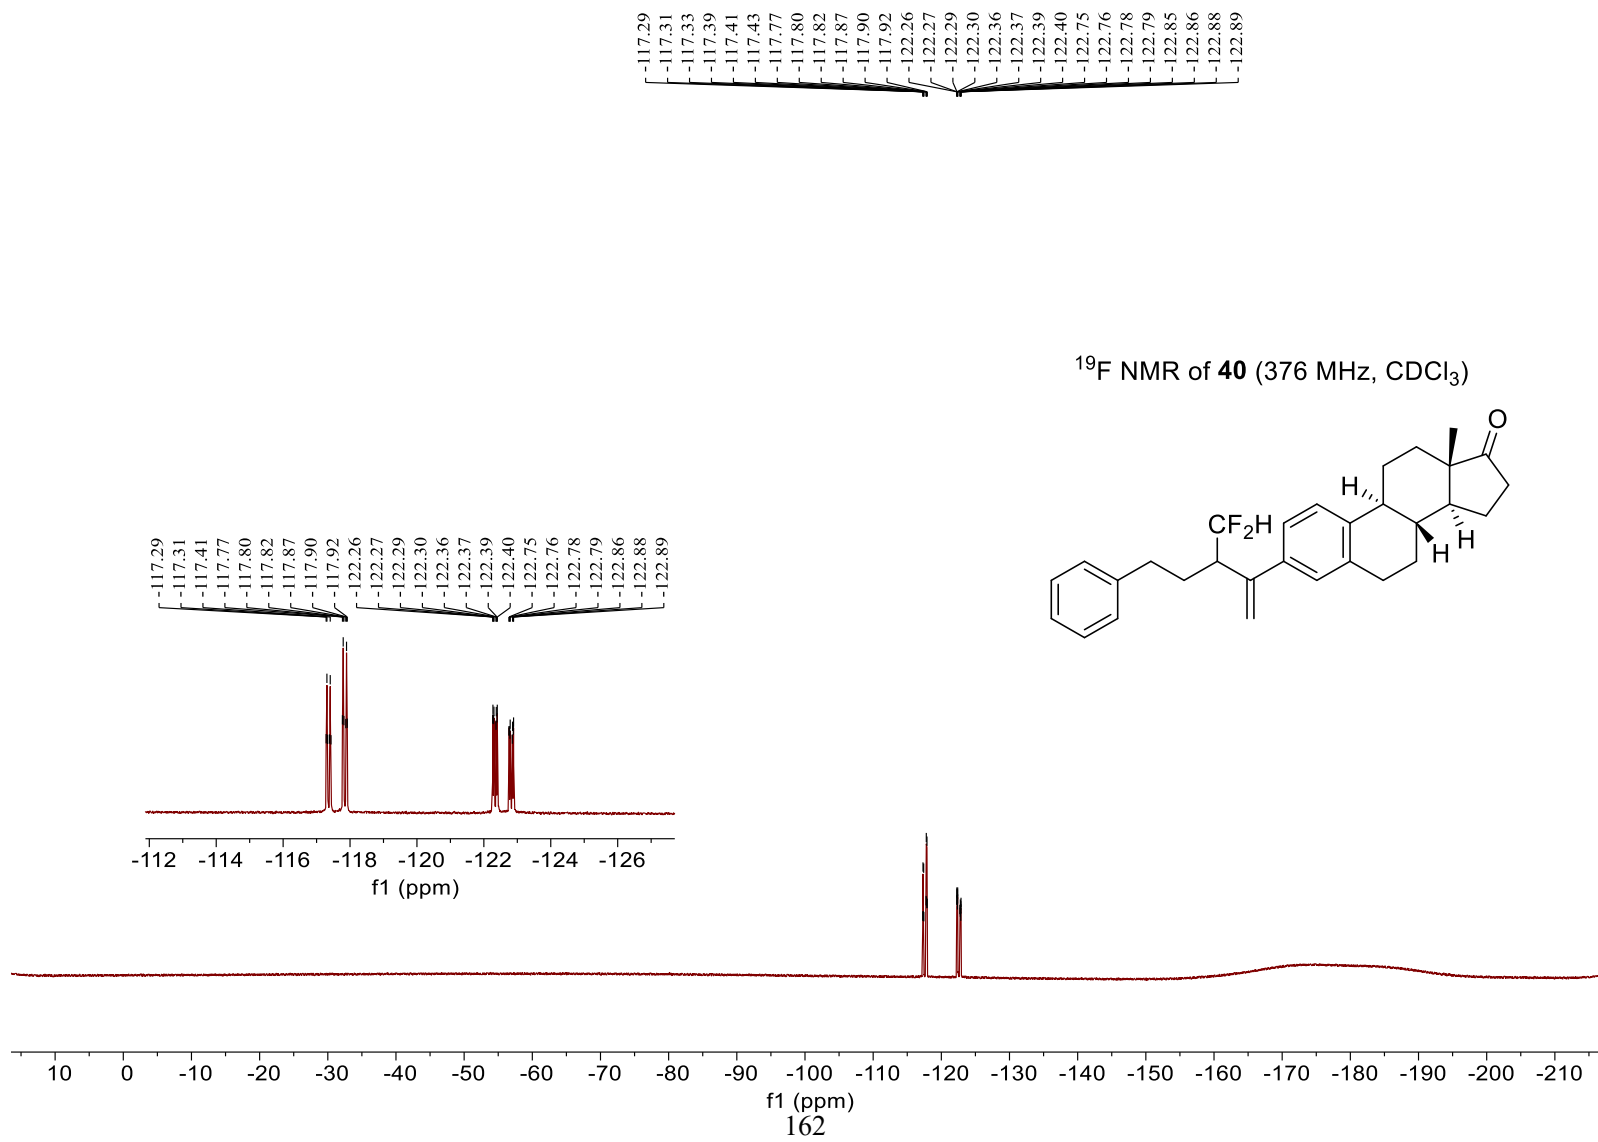

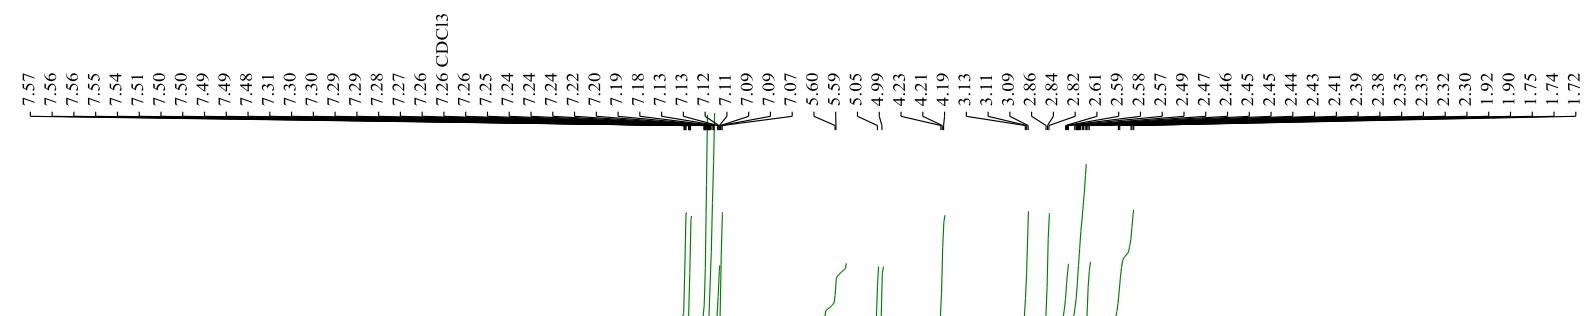

<sup>1</sup>H NMR of **41** (400 MHz, CDCl<sub>3</sub>)

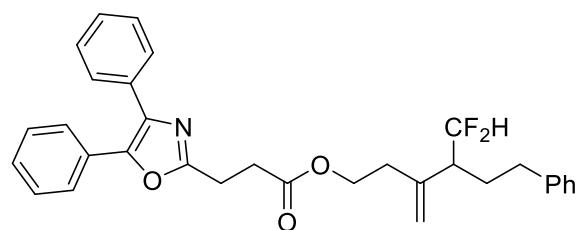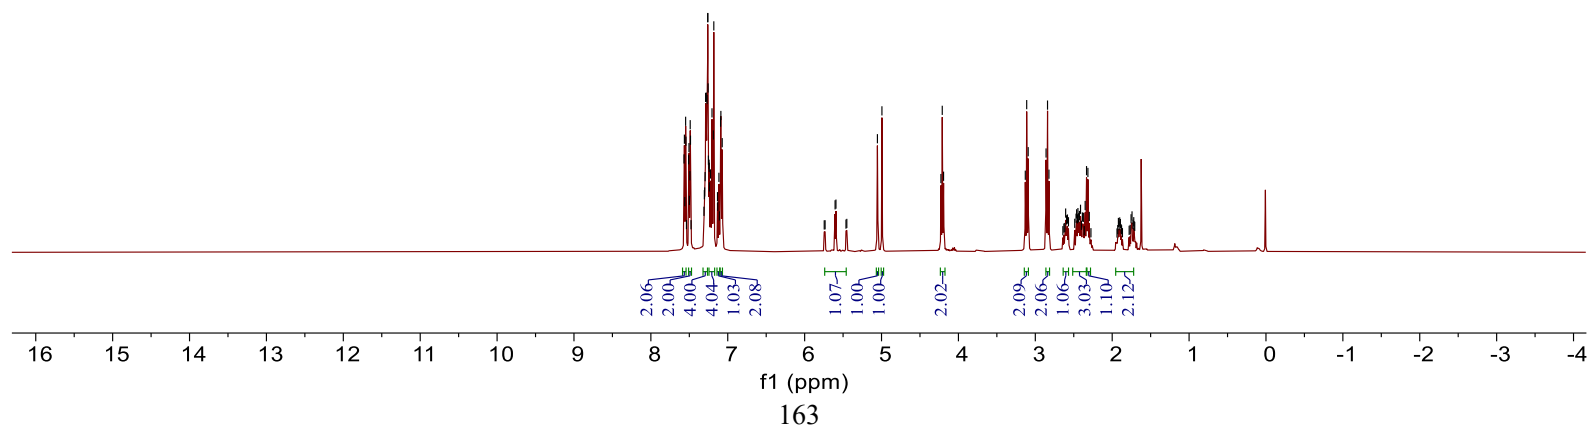

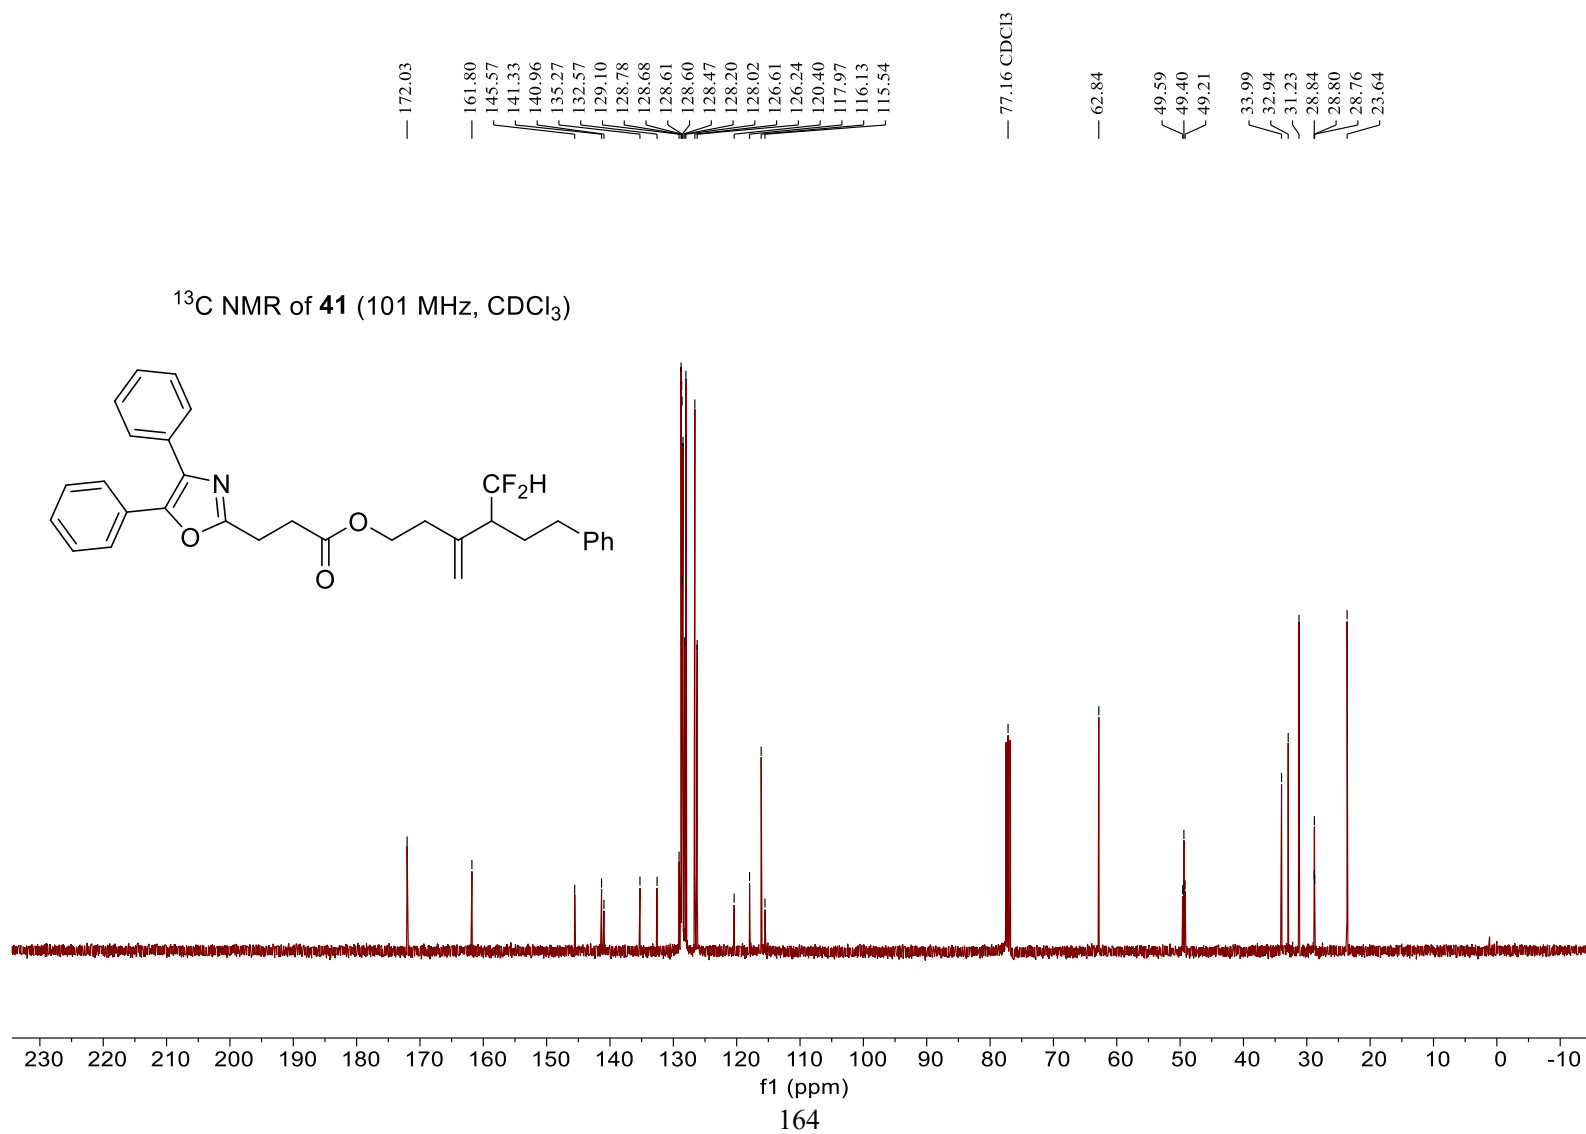



-117.80  
-117.84  
-117.95  
-117.99  
-118.54  
-118.58  
-118.69  
-118.73  
-120.28  
-120.33  
-120.43  
-120.48  
-121.02  
-121.06  
-121.17  
-121.21

$^{19}\text{F}$  NMR of **41** (376 MHz,  $\text{CDCl}_3$ )

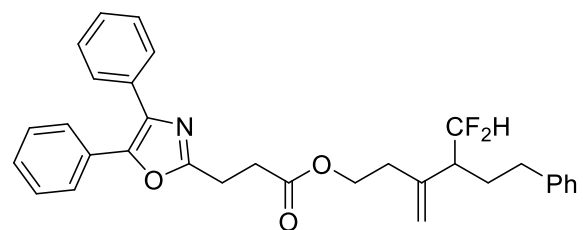

-117.80  
-117.84  
-117.95  
-117.99  
-118.54  
-118.58  
-118.69  
-118.73  
-120.28  
-120.33  
-120.43  
-120.48  
-121.02  
-121.06  
-121.17  
-121.21

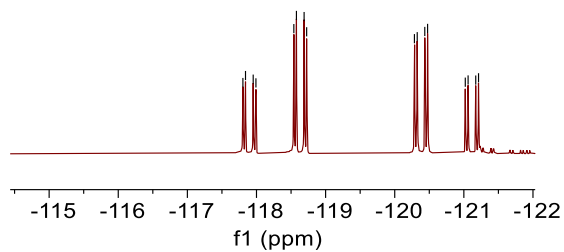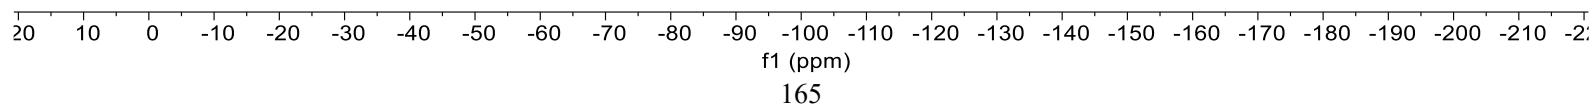

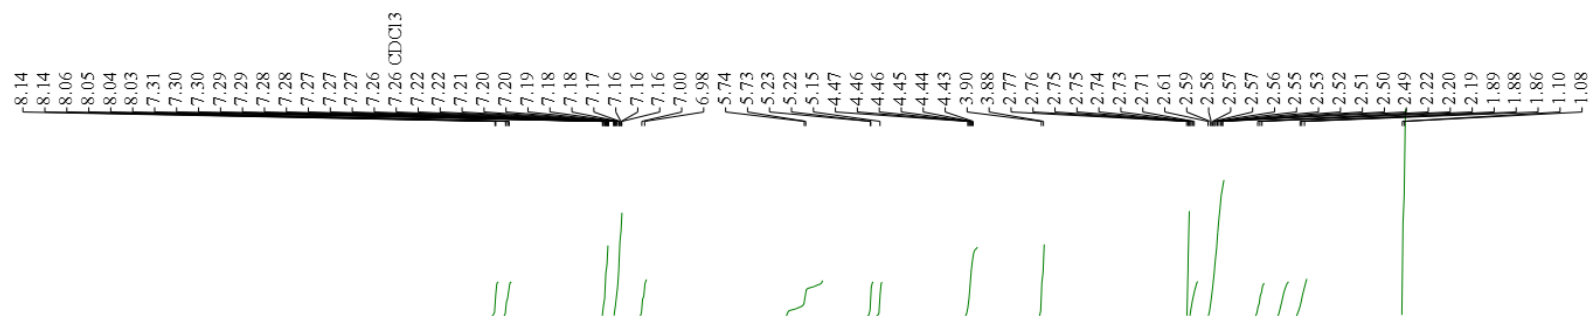

<sup>1</sup>H NMR of **42** (400 MHz, CDCl<sub>3</sub>)

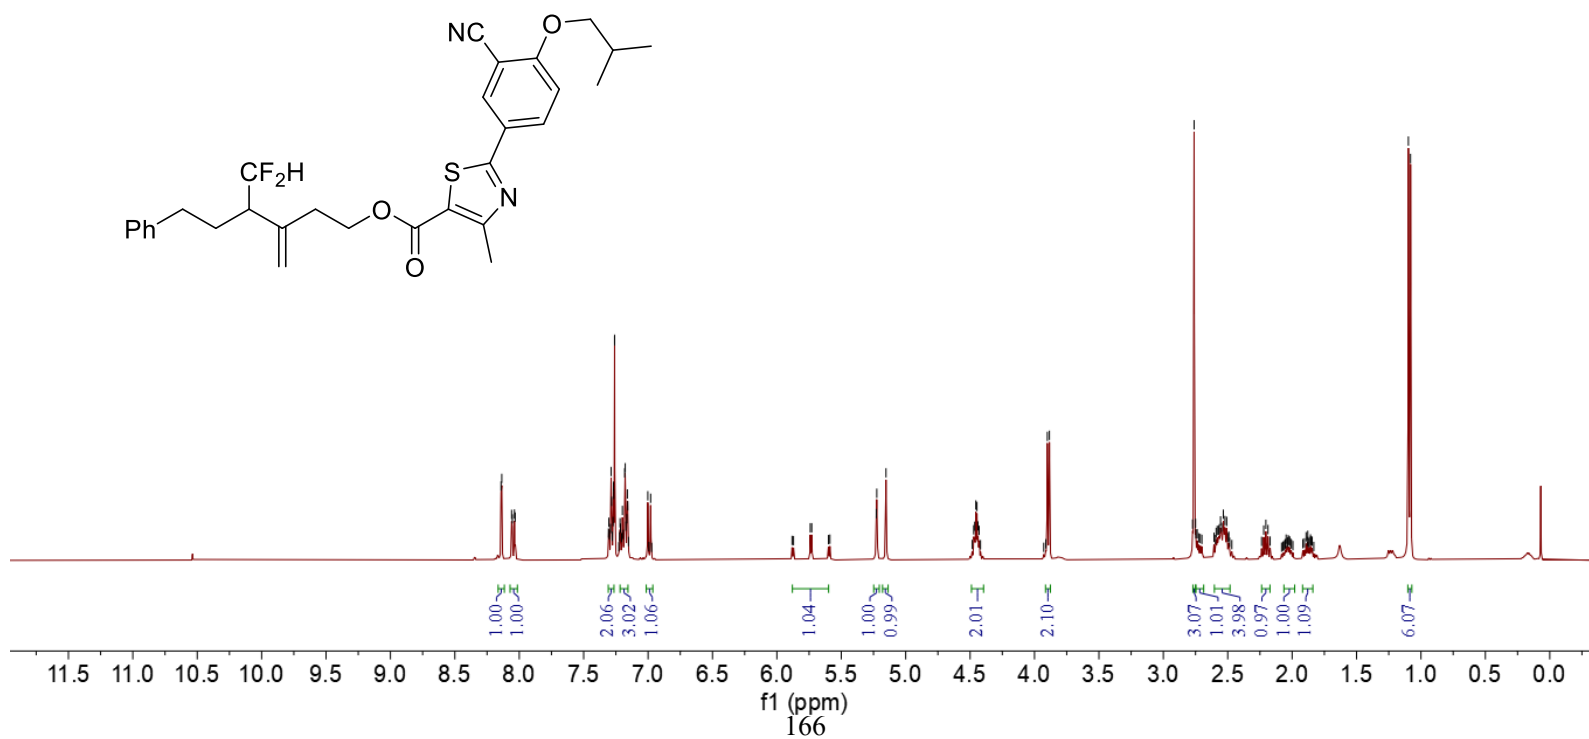

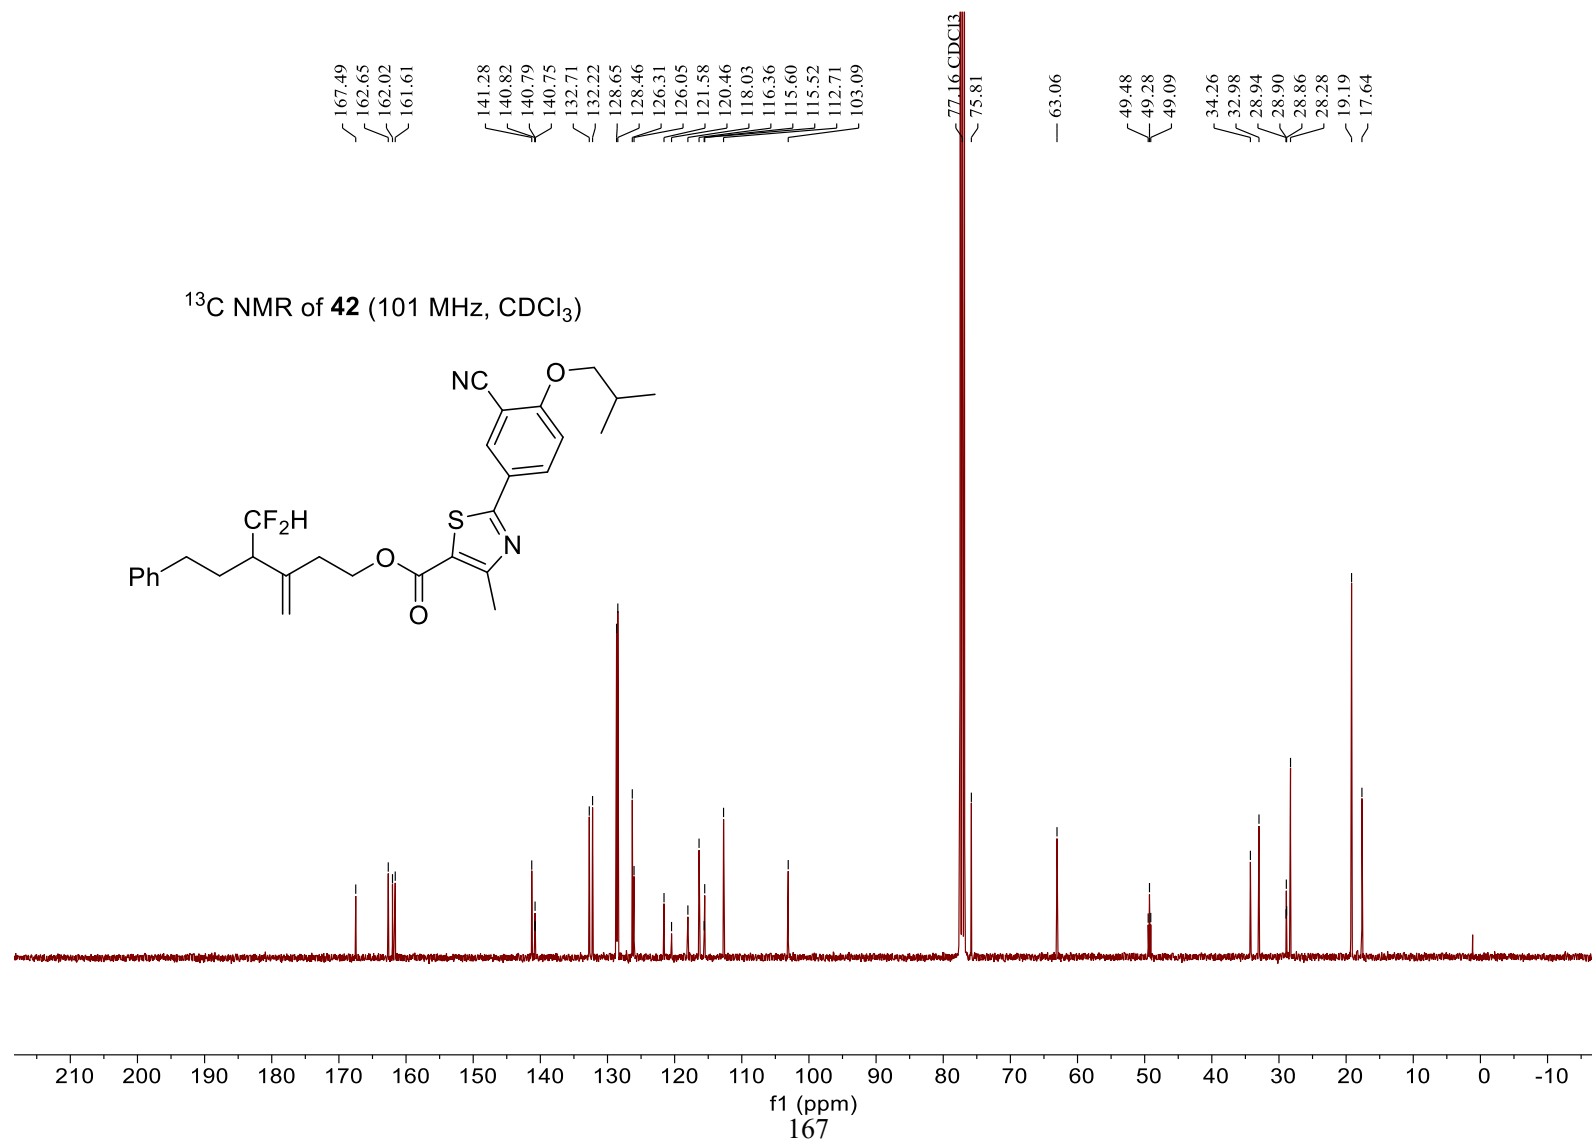

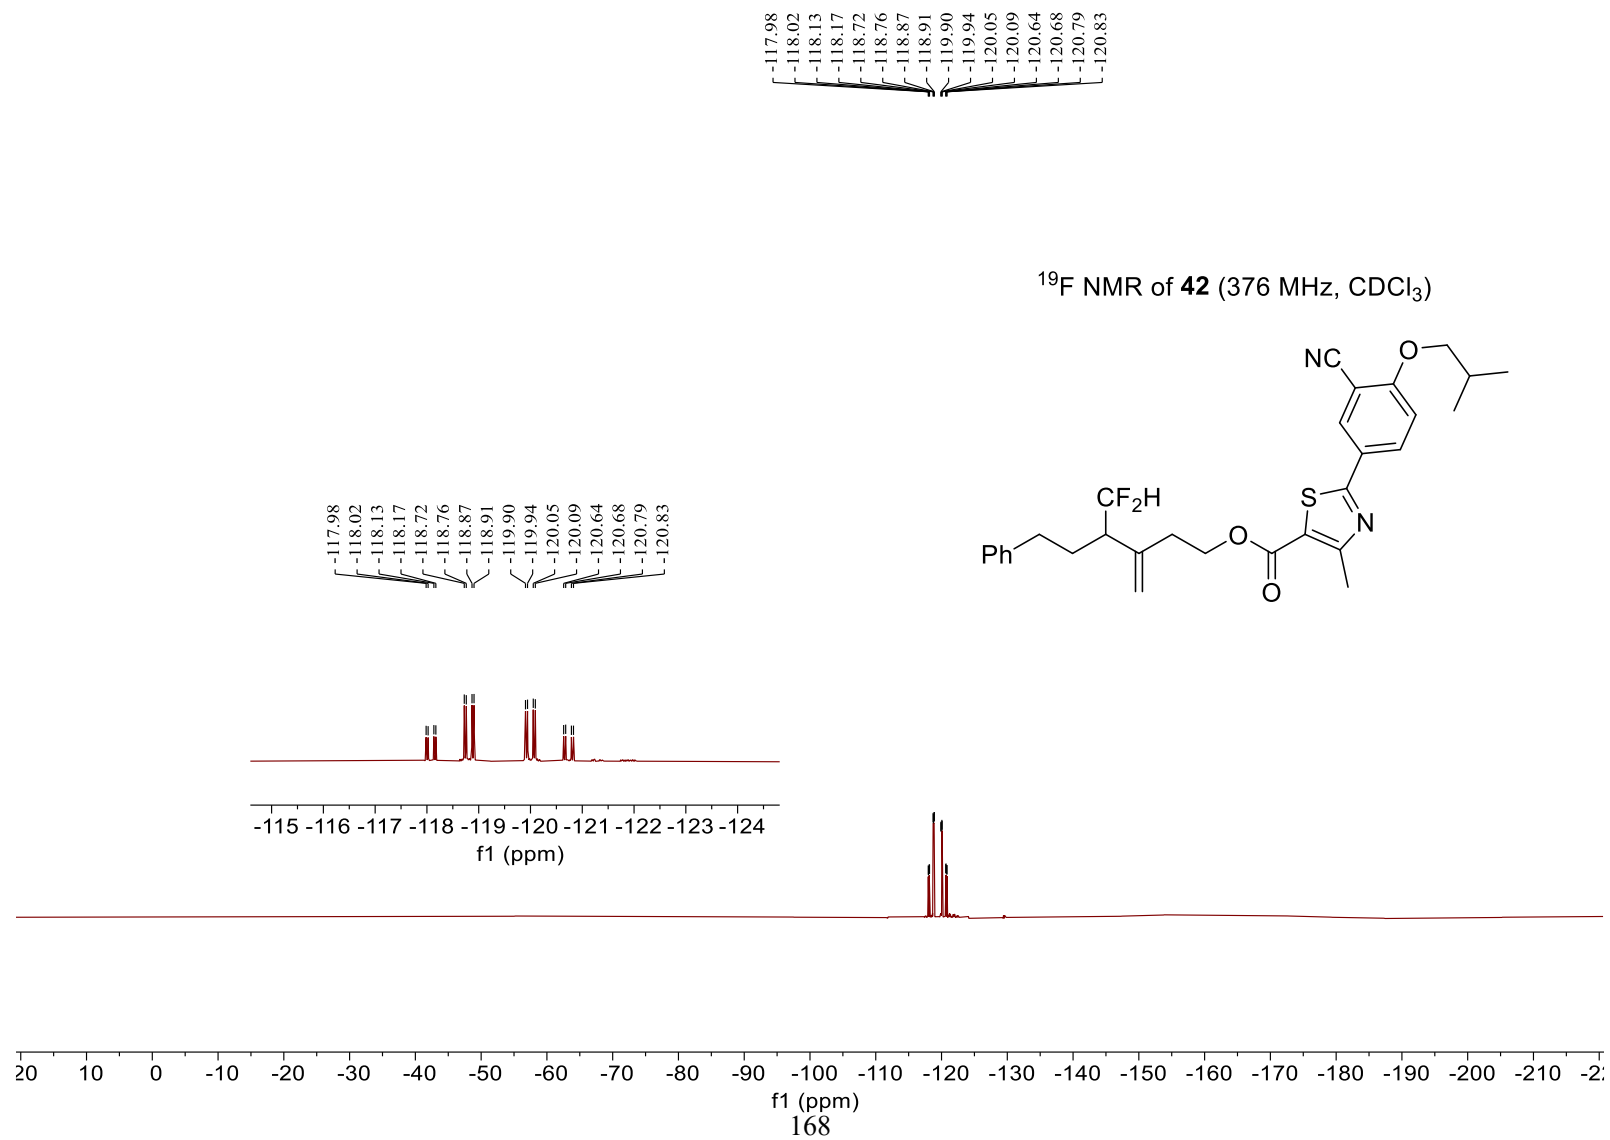

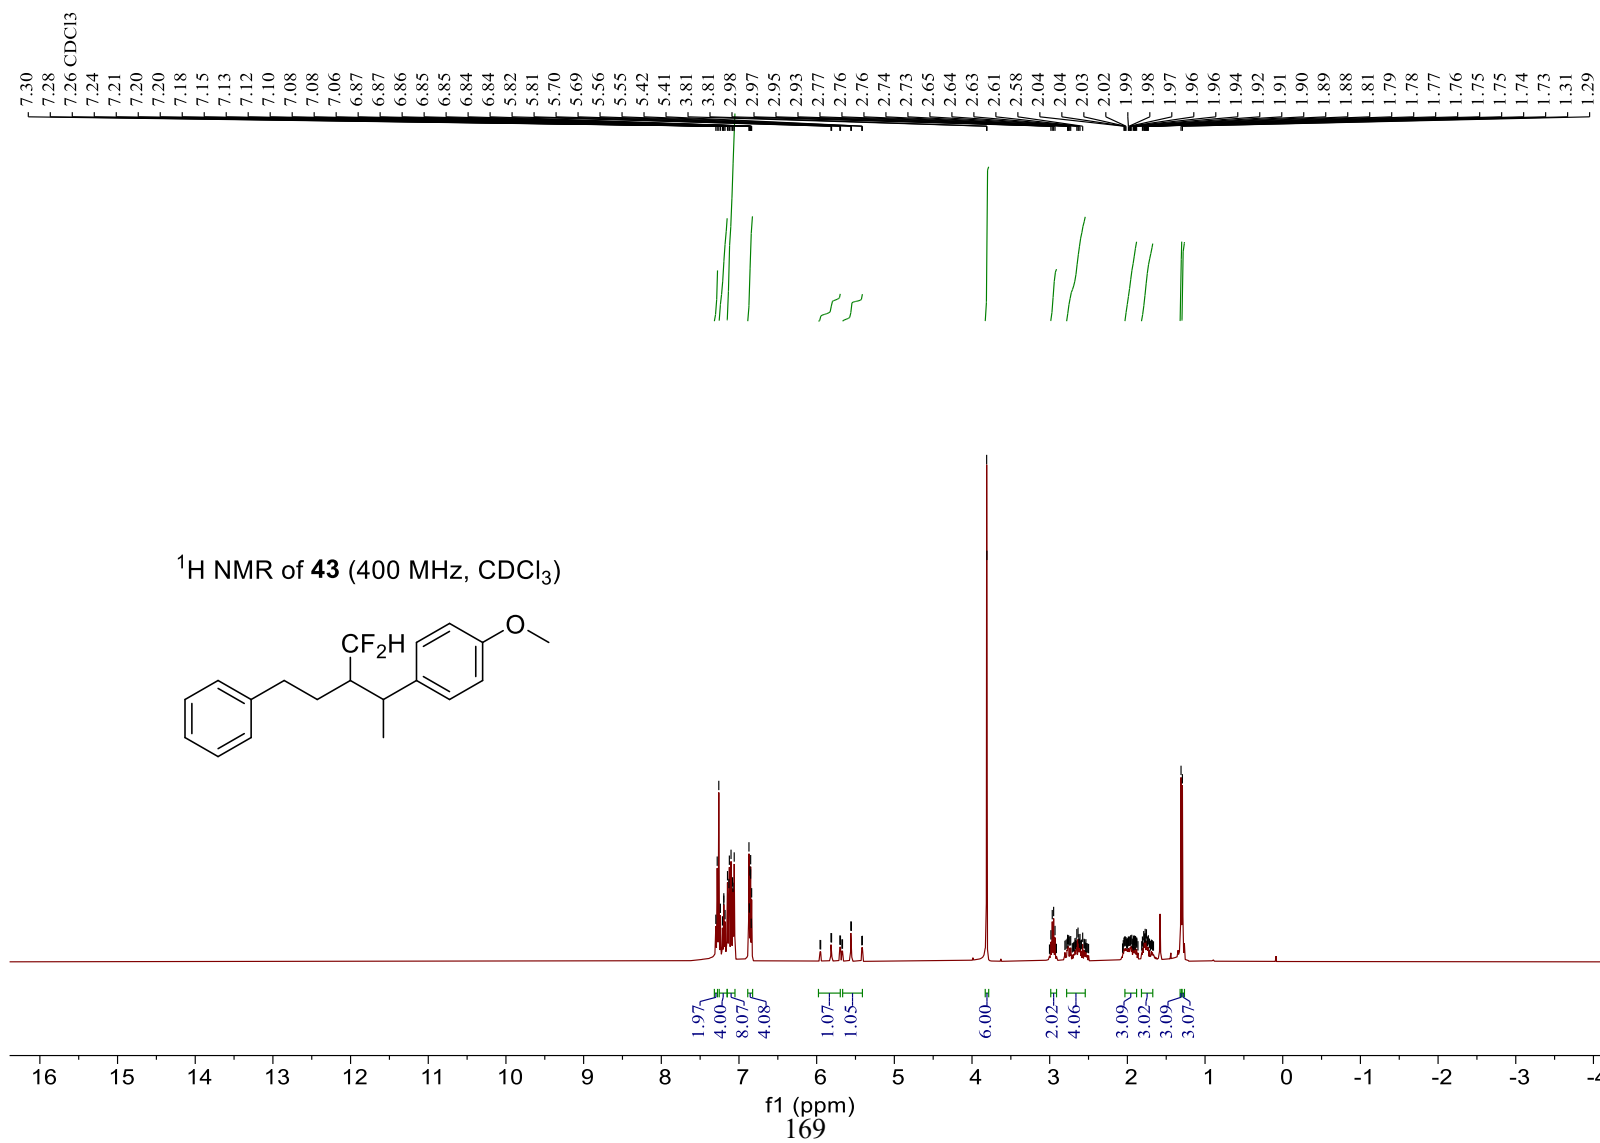

<sup>13</sup>C NMR of **43** (101 MHz, CDCl<sub>3</sub>)

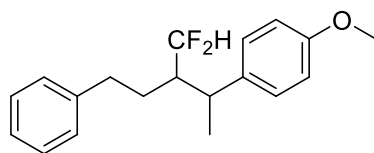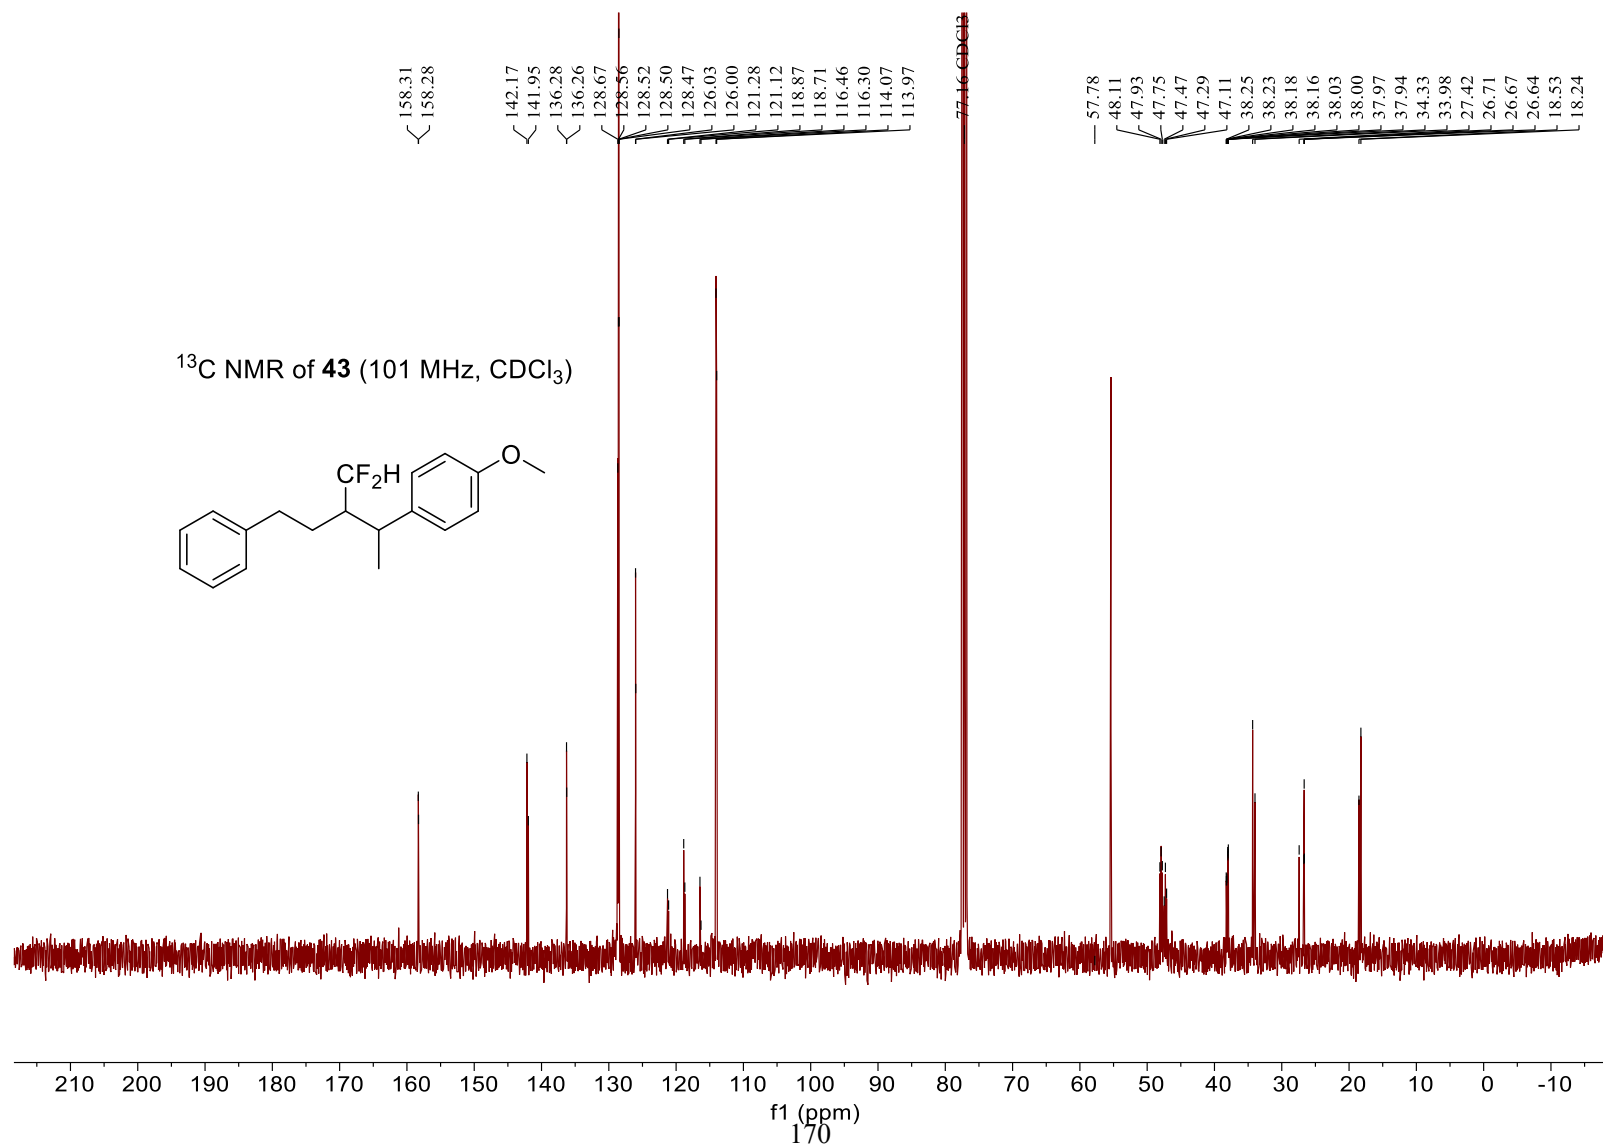

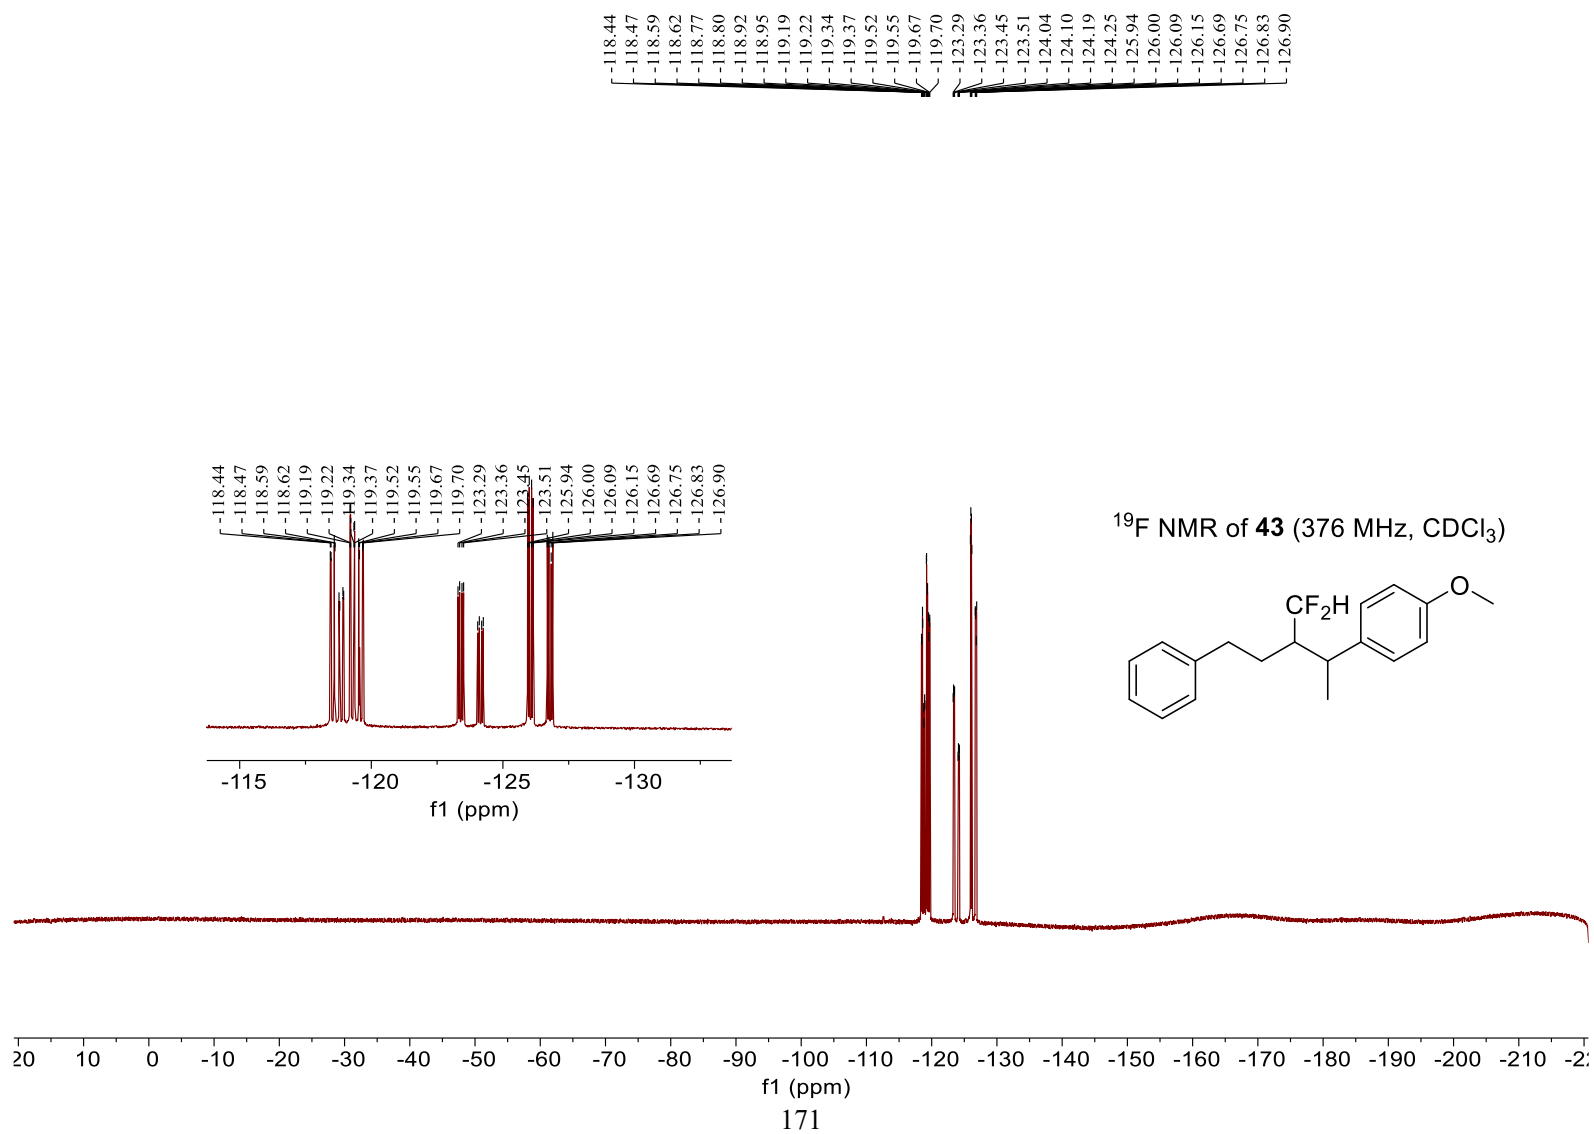

<sup>1</sup>H NMR of **44** (400 MHz, CDCl<sub>3</sub>)

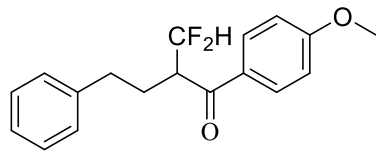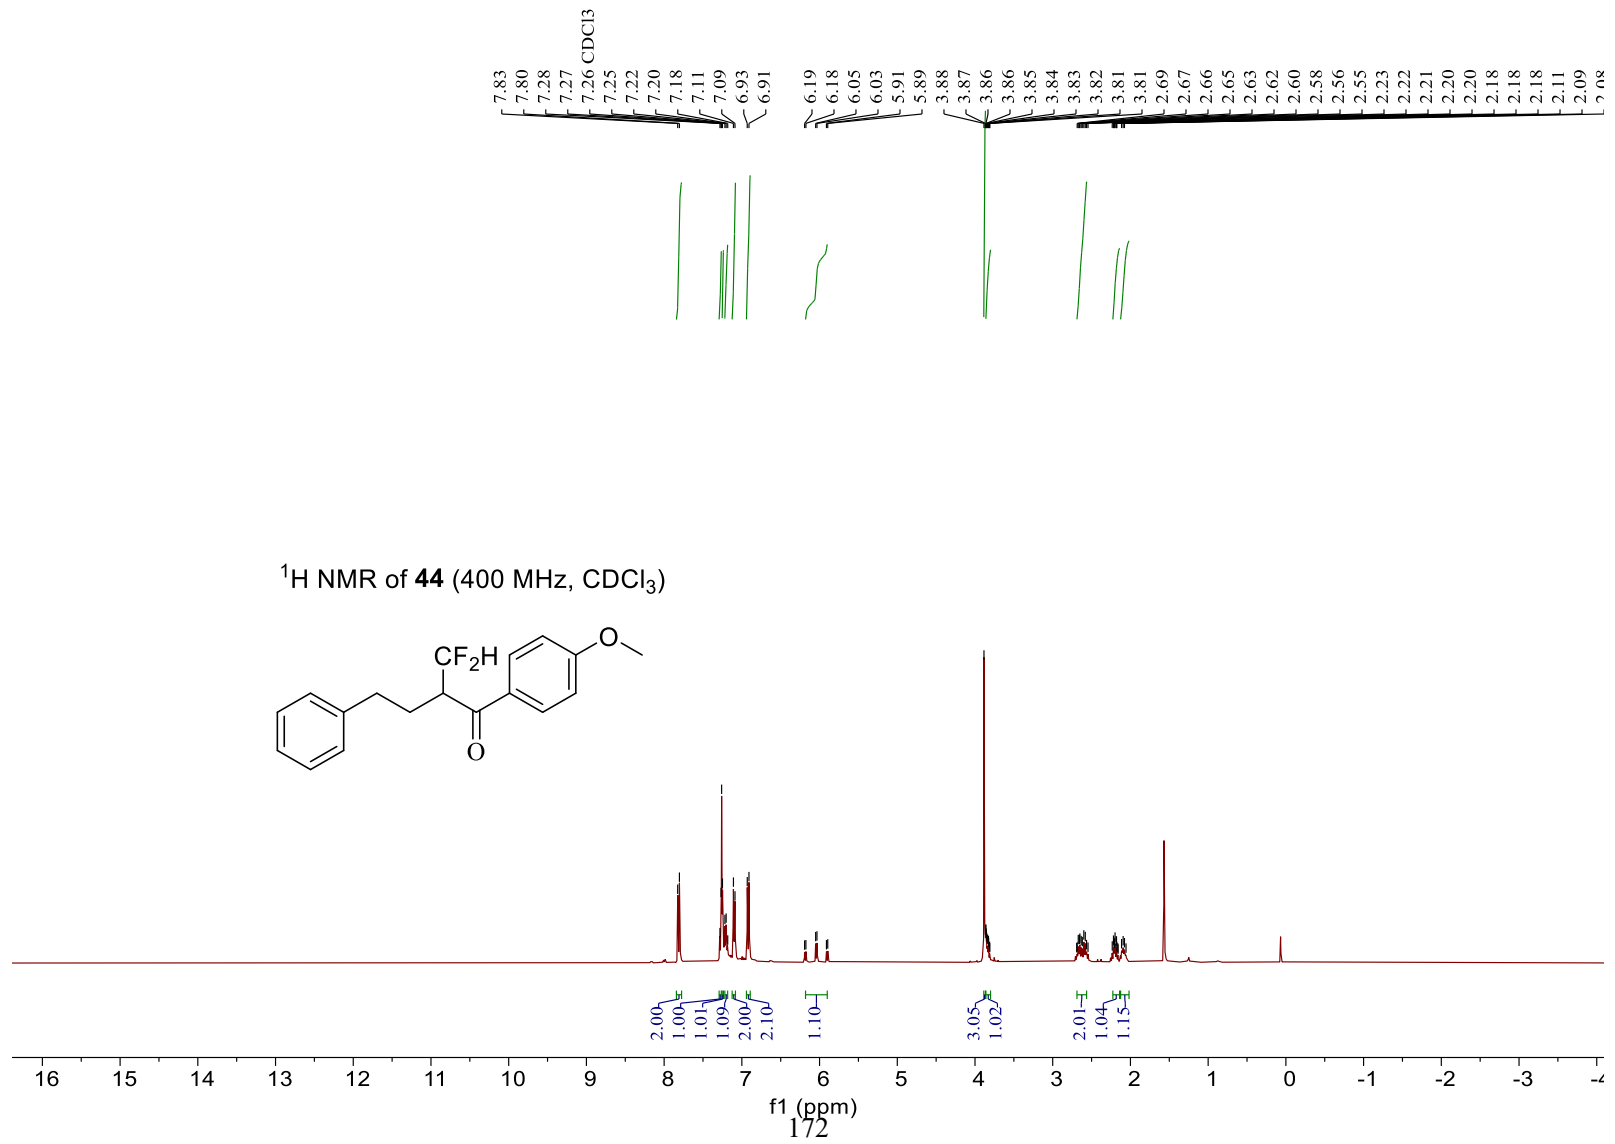



$^{13}\text{C}$  NMR of **44** (101 MHz,  $\text{CDCl}_3$ )

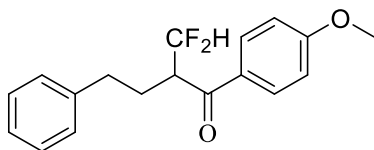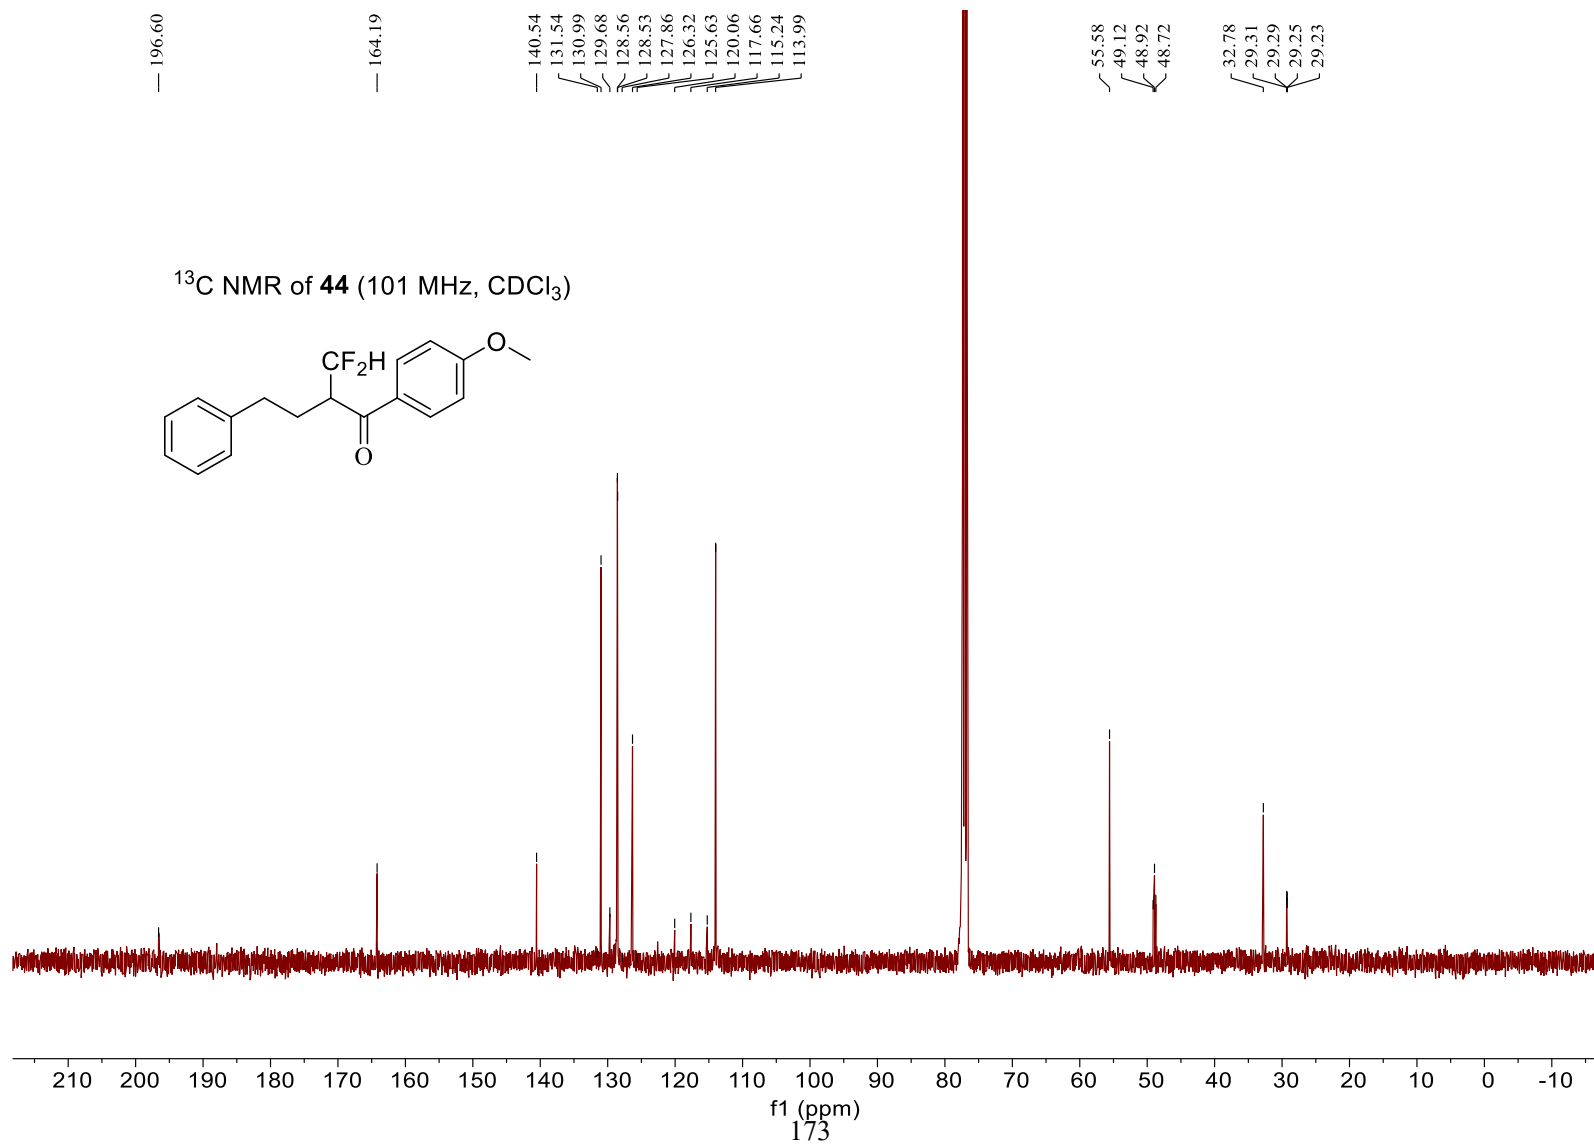

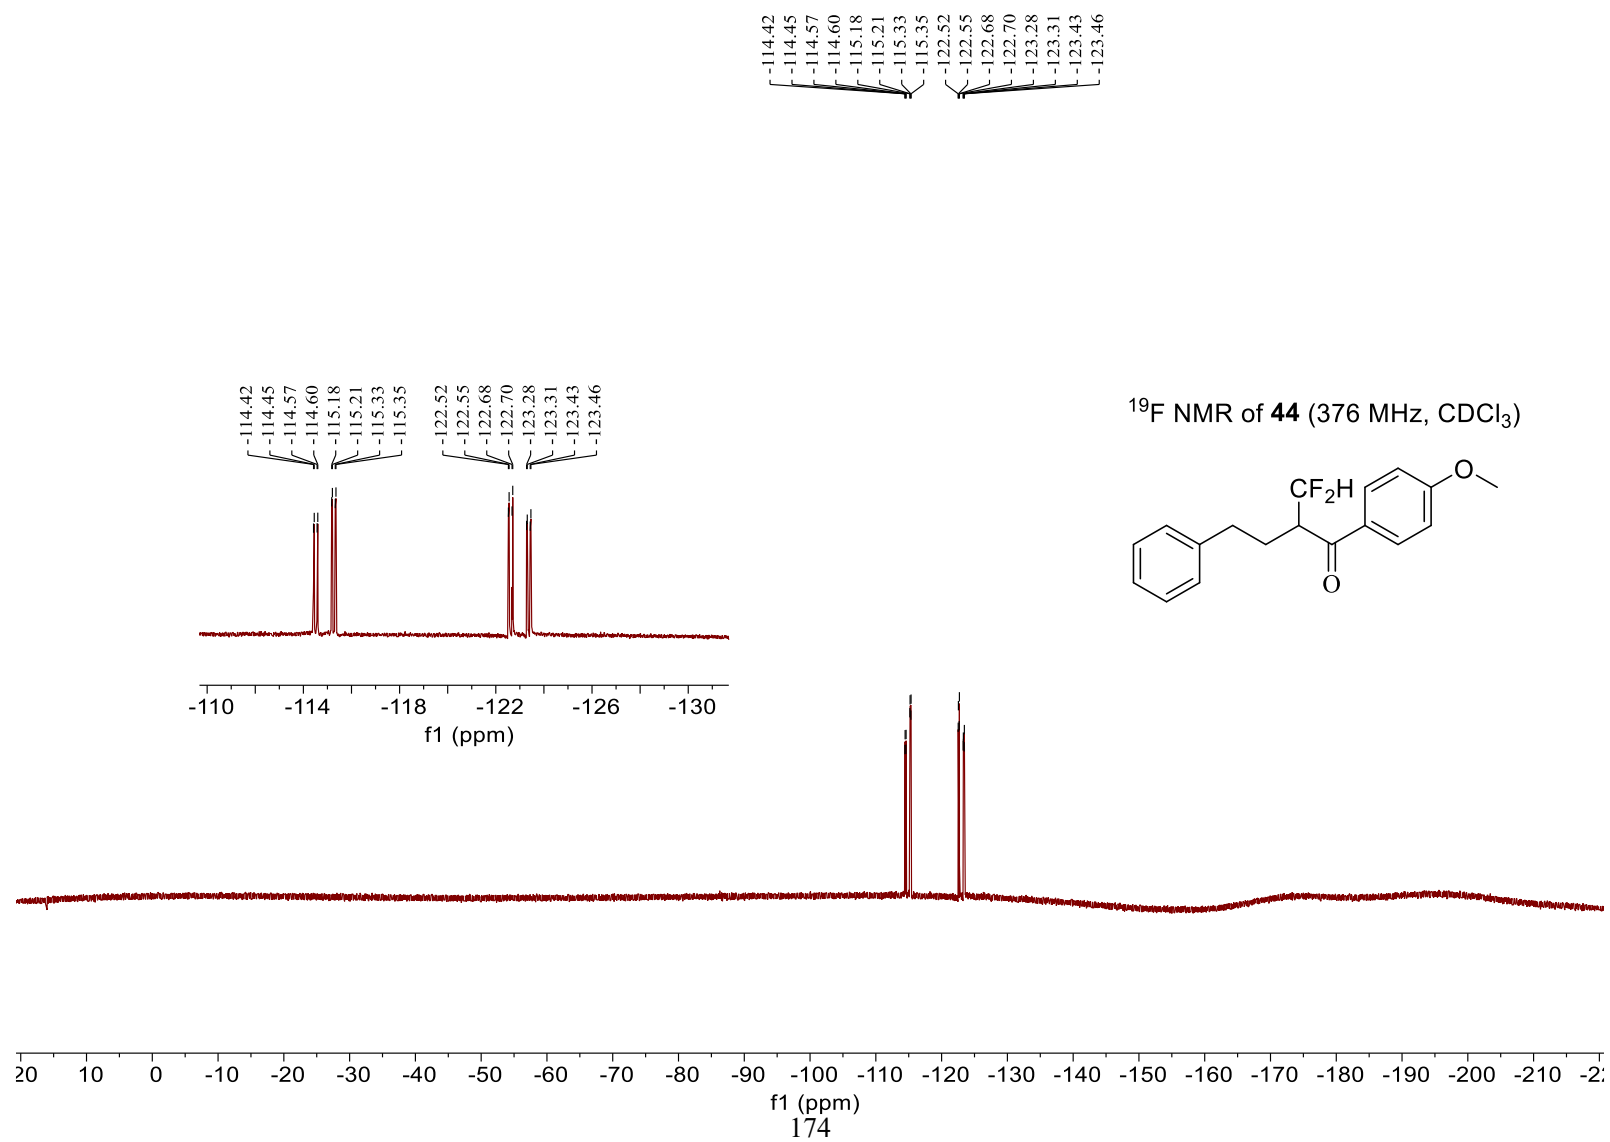

$^1\text{H}$  NMR of **45** (400 MHz,  $\text{CDCl}_3$ )

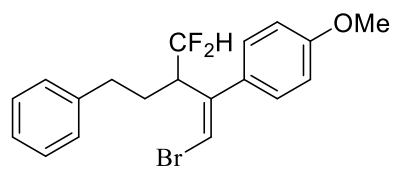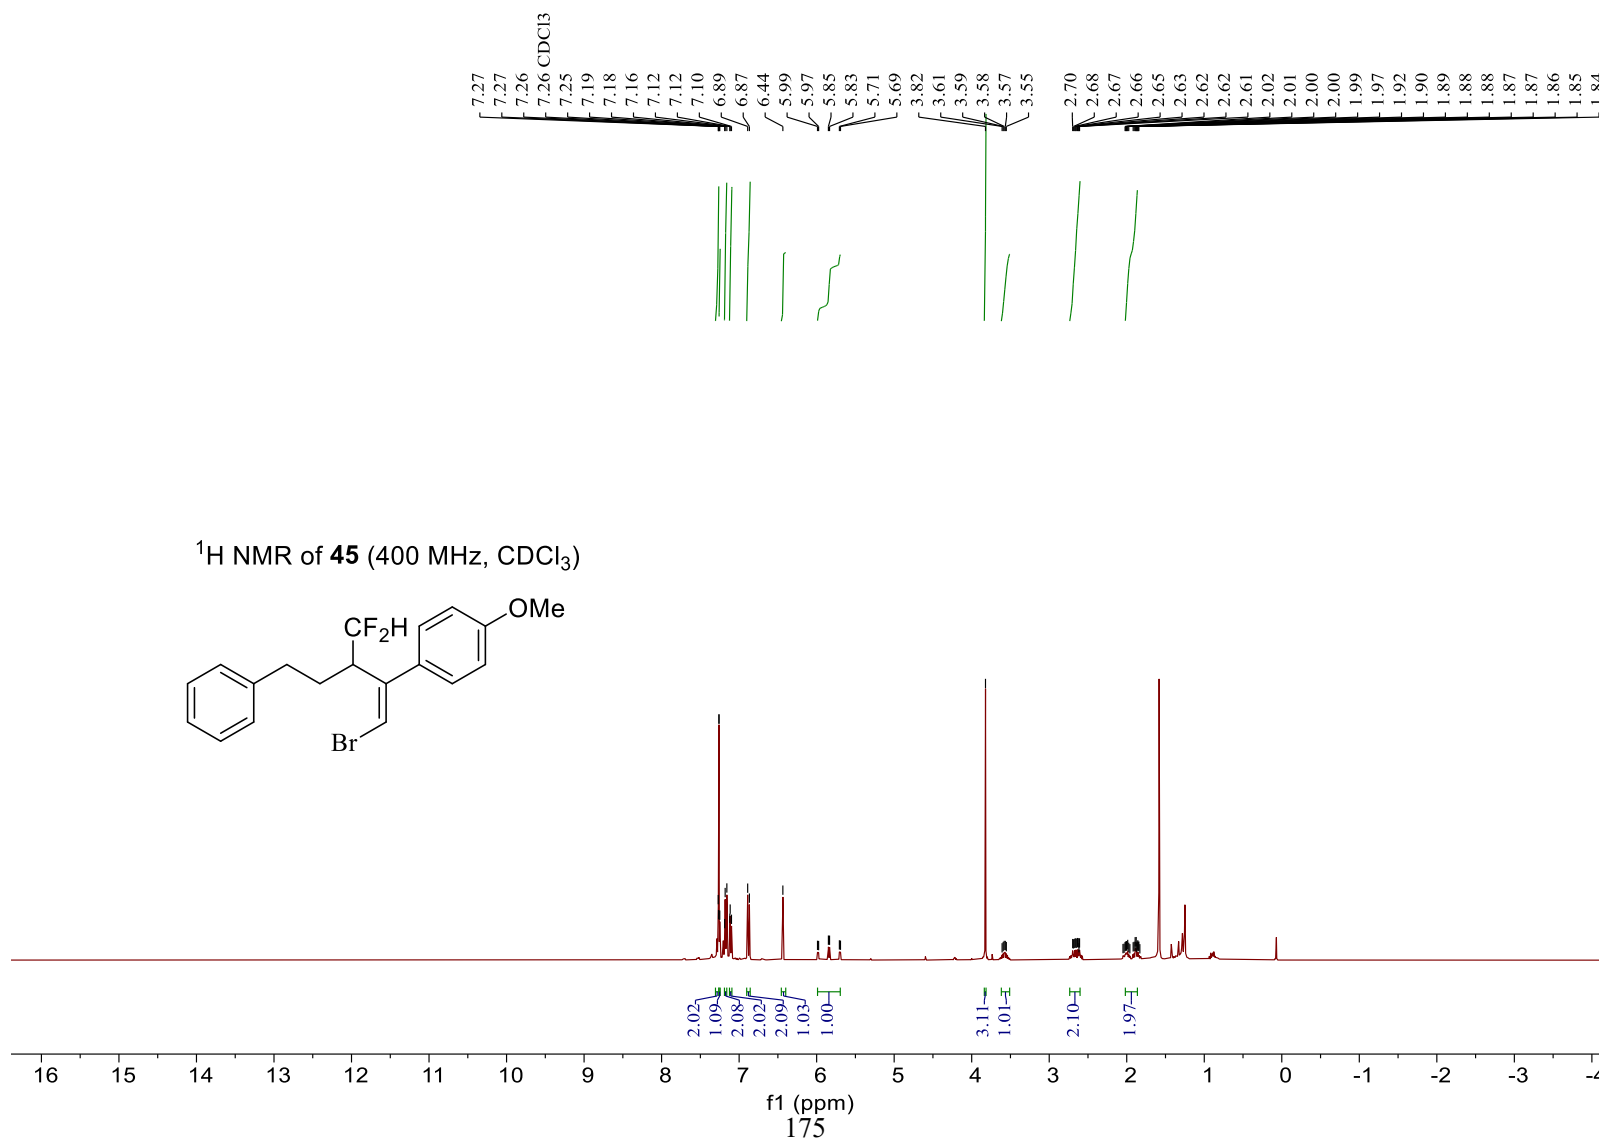

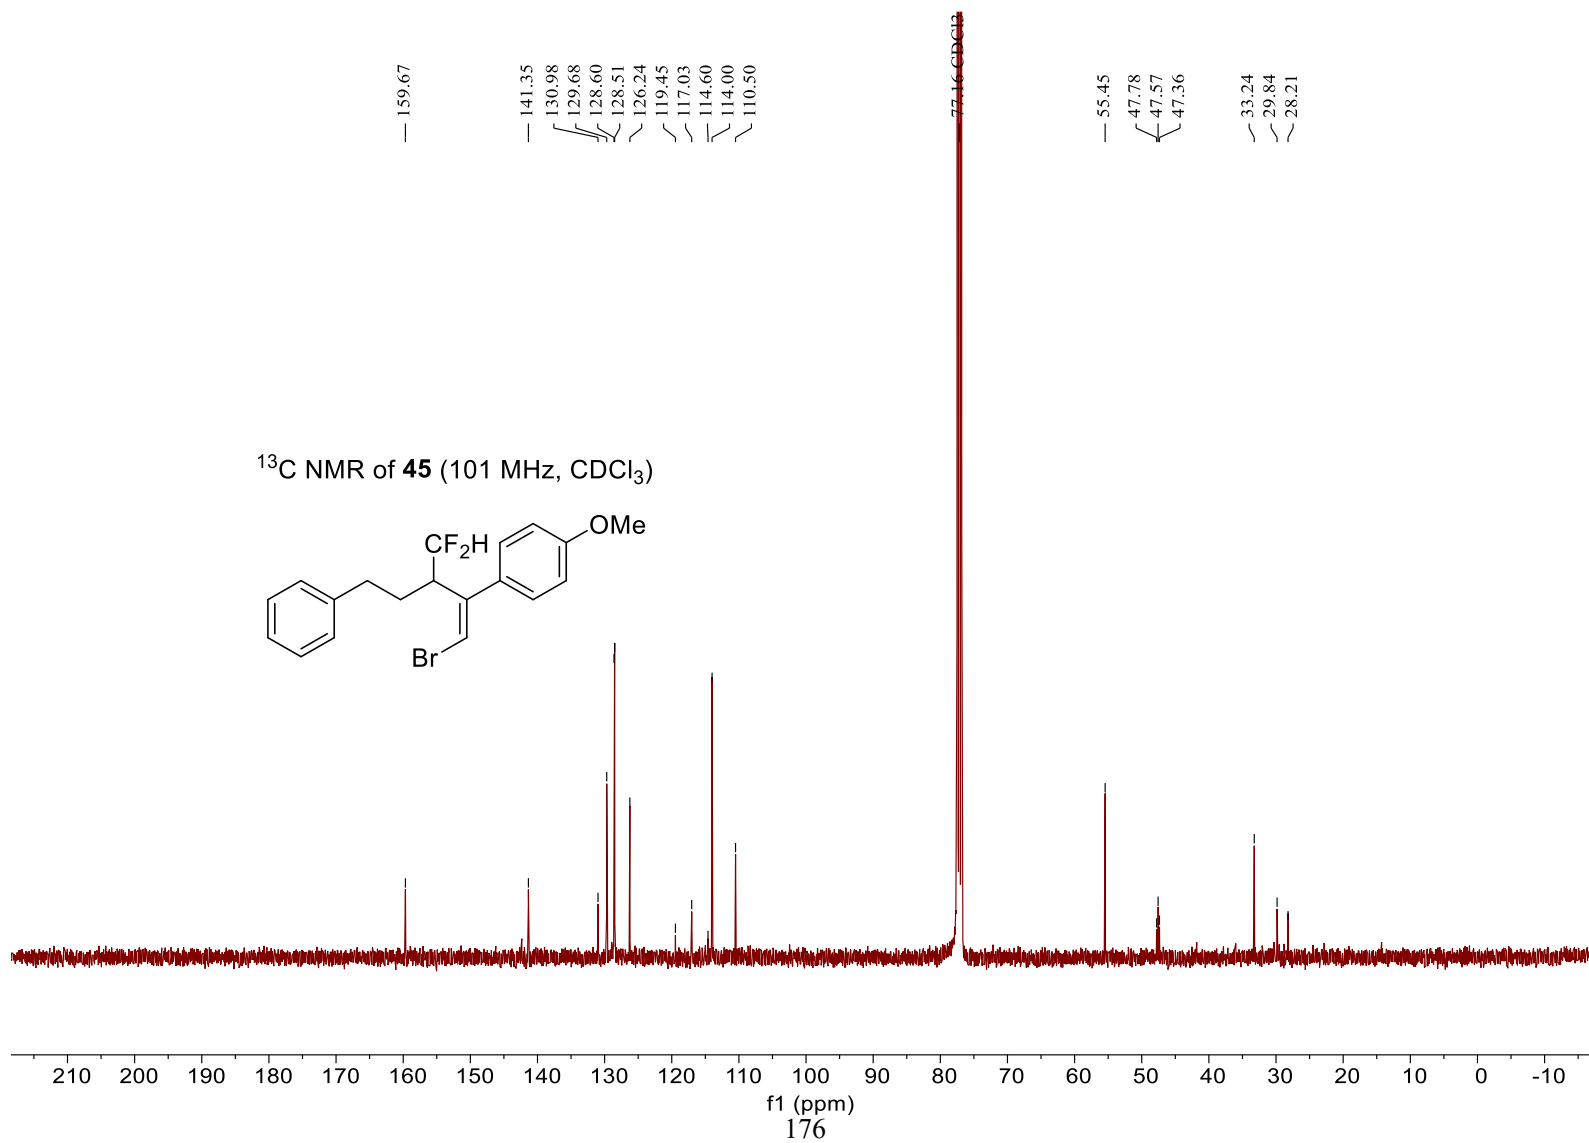

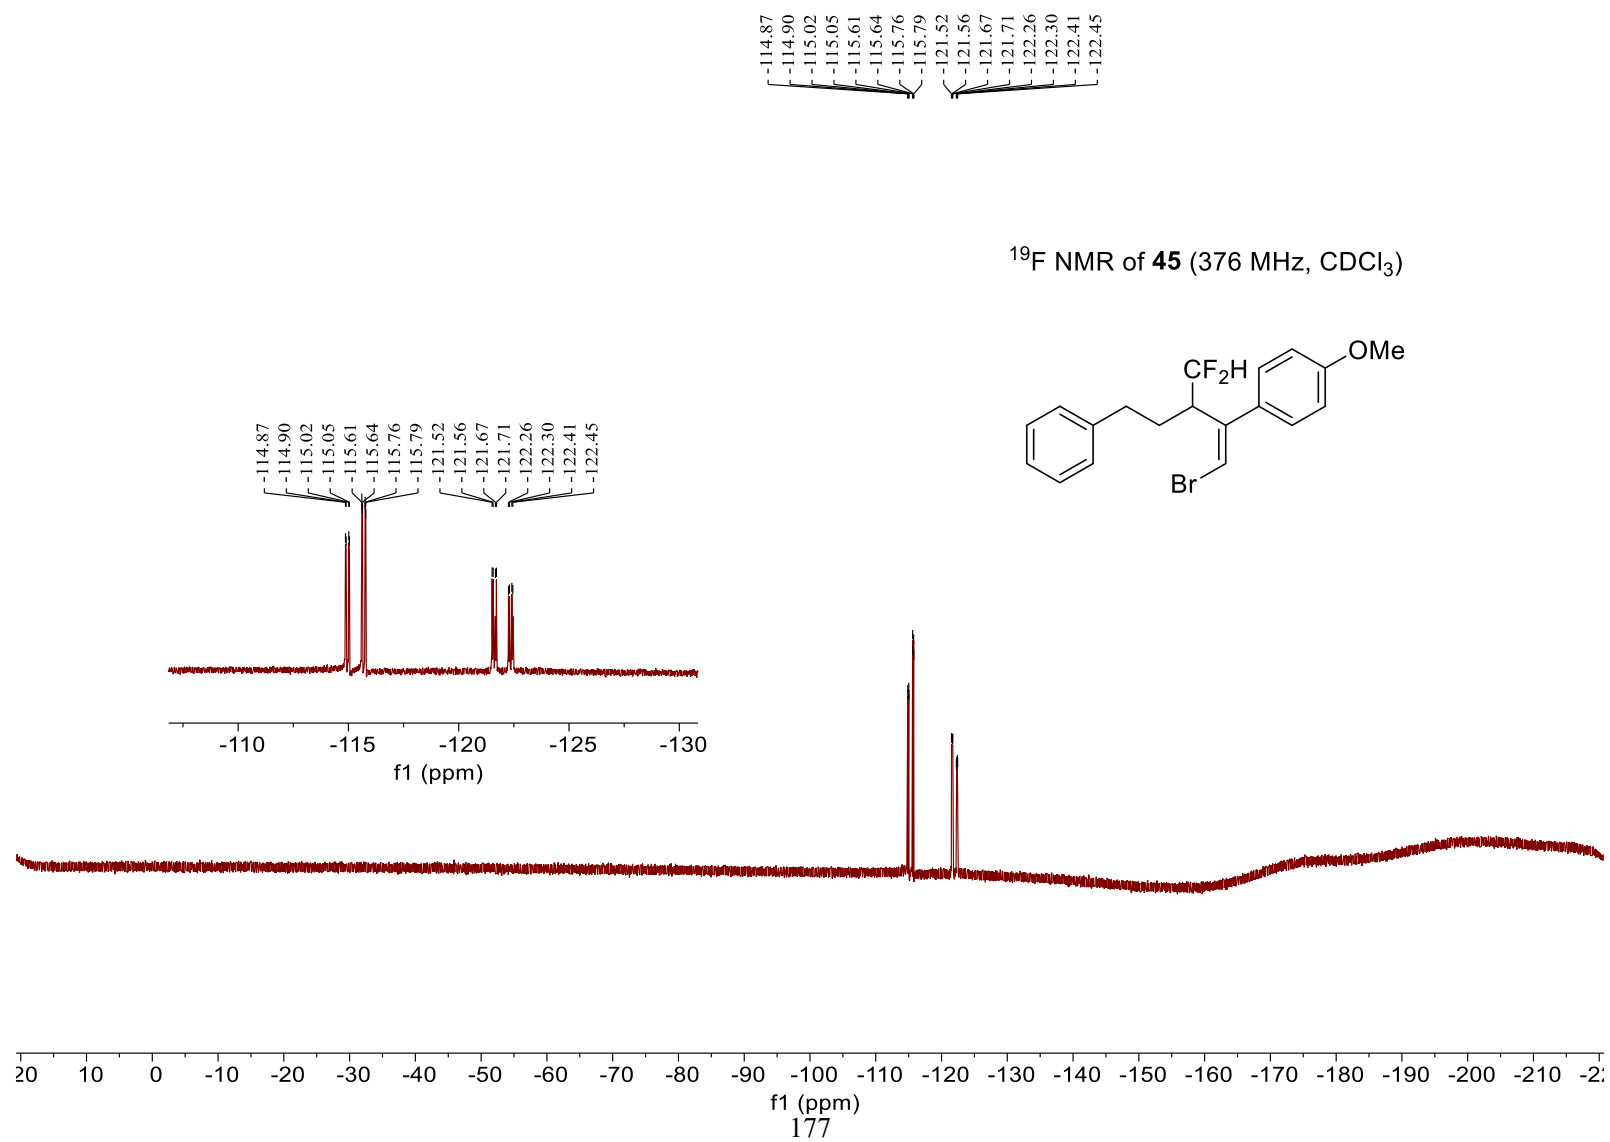

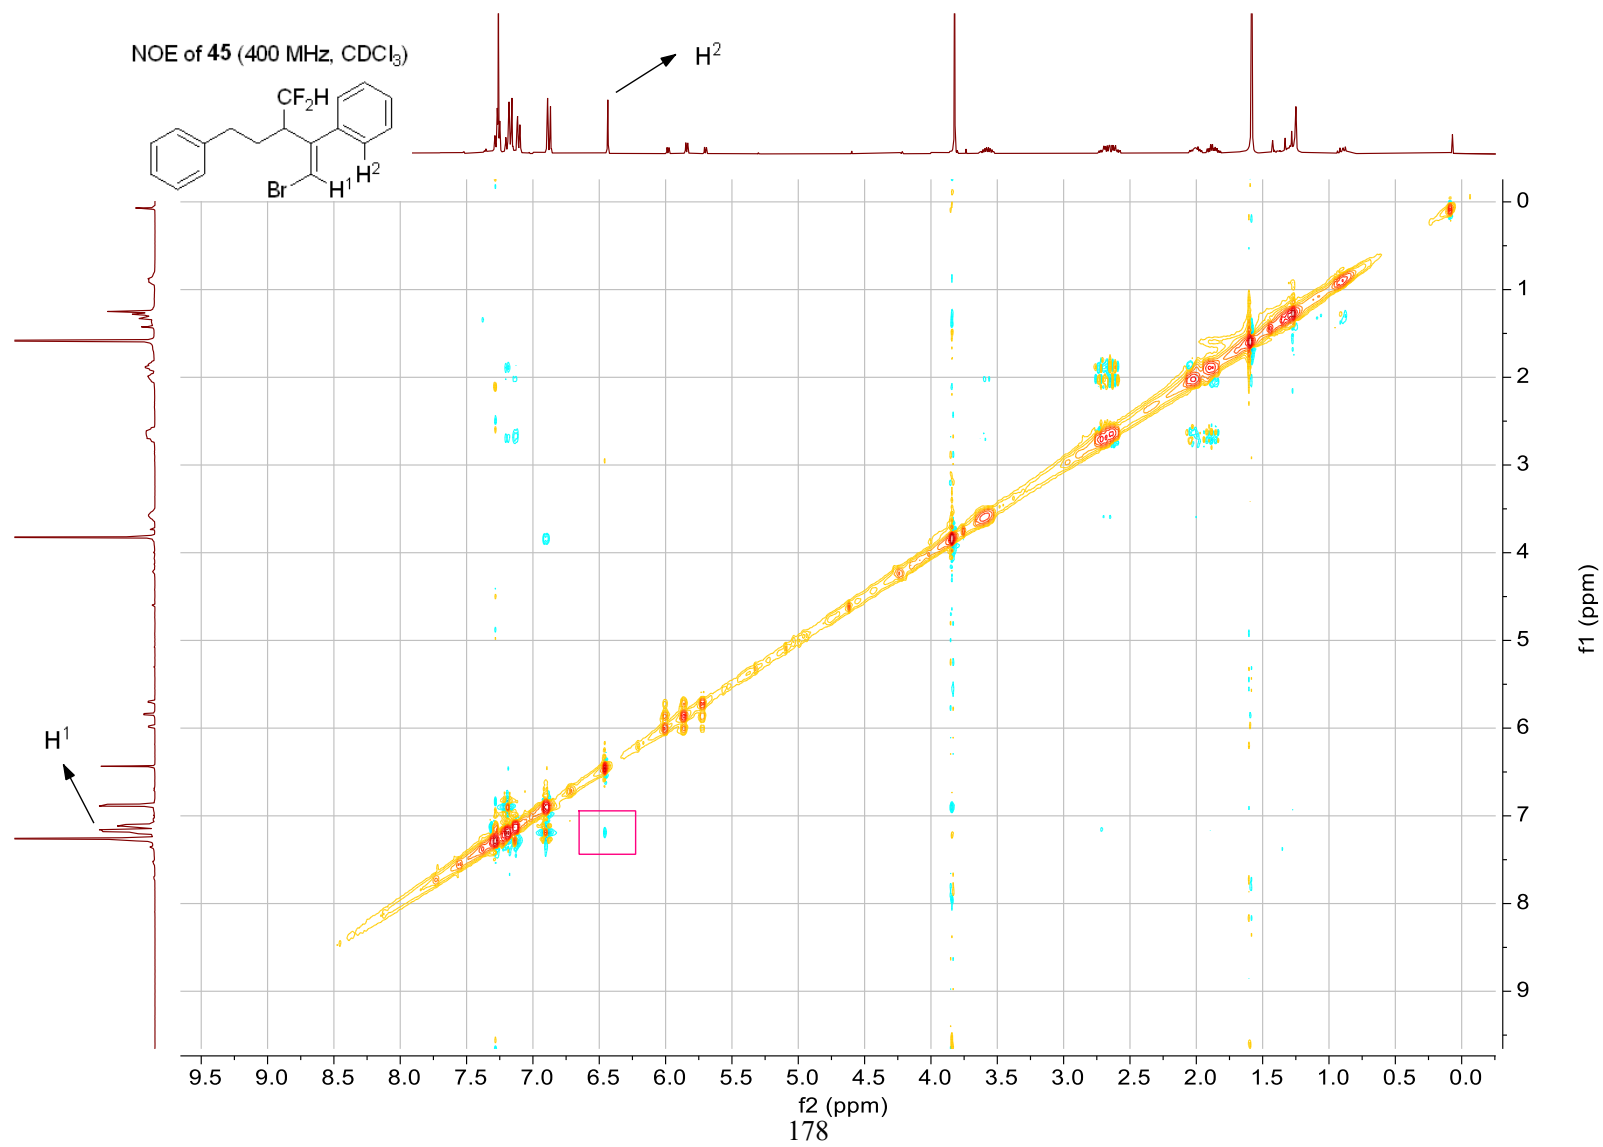

Supplement: d5cc06347g1.pdf [file d5cc06347g1.pdf]
